# Supplementary material for: Comparative Cell Surface Proteomic Analysis of the Primary Human T Cell and Monocyte Responses to Type I Interferon
Source: Front Immunol. 2021 Feb 8;12:600056. doi: 10.3389/fimmu.2021.600056 (PMC7897682; doi:10.3389/fimmu.2021.600056)
Supplement: Supplementary file 3 [file Table_2.xlsx]

## Sheet: S2A
Pre- and post- enrichment cell purity for CD14+ monocytes and CD4+ T cells, assessed by flow cytometry.
	CD14+ monocyte donors	Pre-enrichment percent CD14+	Post-enrichment percent CD14+
	Donor 1	18	91
	Donor 2	26	93
	Donor 3	20	93
	Donor 4	22	92
	Donor 5	28	90
	CD4+ T cell donors	Pre-enrichment percent CD4+	Post-enrichment percent CD4+
	Donor 6	30	96
	Donor 7	45	91
	Donor 8	45	96
	Donor 9	20	96
	Donor 10	25	97

## Sheet: S2B
Number of proteins and peptides quantified in each cell type
	Cell type	Total number of proteins quantified	Number of annotated PM proteins examined	Total Number of peptides	Number of peptides in examined PM annotated proteins
	Thp-1	720	570	8775	7338
	Pan monocyte	716	582	6141	5627
	CD14+ monocyte	989	606	5914	4957
	CD4+ T cells	798	482	4826	3833
