# Supplementary material for: Comparative Cell Surface Proteomic Analysis of the Primary Human T Cell and Monocyte Responses to Type I Interferon
Source: Front Immunol. 2021 Feb 8;12:600056. doi: 10.3389/fimmu.2021.600056 (PMC7897682; doi:10.3389/fimmu.2021.600056)
Supplement: Supplementary file 4 [file Table_3.xlsx]

## Sheet: S3A - Monocytes
Protein Id	Uniprot-L	Uniprot-S	Gene Symbol	Description	CD14+ Monocytes Peptides	M	PM	IPM	CS	XC	Nuc	ShG	Sum of peptides max precursor intensities (MPI)	Theroetical number of tryptic peptides	iBAQ (MPI / number of tryptic peptides)	Scaling factor (unstimulated S:N / total S:N)	iBAQ * scaling factor for unstimulated samples	% of cell surface (PM annotated proteins only, across all donors)	% of cell surface in Donor 1 CD14+ Monocytes	% of cell surface in Donor 2 CD14+ Monocytes	% of cell surface in Donor 3 CD14+ Monocytes	% of cell surface in Donor 4 CD14+ Monocytes	% of cell surface in Donor 5 CD14+ Monocytes	Donor 1 CD14+ monocytes stimulated with IFNa2a S:N	Donor 1 CD14+ monocytes unstimulated S:N	Donor 2 CD14+ monocytes stimulated with IFNa2a S:N	Donor 2 CD14+ monocytes unstimulated S:N	Donor 3 CD14+ monocytes stimulated with IFNa2a S:N	Donor 3 CD14+ monocytes unstimulated S:N	Donor 4 CD14+ monocytes stimulated with IFNa2a S:N	Donor 4 CD14+ monocytes unstimulated S:N	Donor 5 CD14+ monocytes stimulated with IFNa2a S:N	Donor 5 CD14+ monocytes unstimulated S:N
sp|P16070|CD44_HUMAN	P16070	P16070	CD44	CD44 antigen	312	M	PM		CS				5.63473e+10	27	2.08694e+09	0.560841	1.17044e+09	30.0714	24.0746	31.9726	32.4188	31.2127	30.8041	36153.4	49326.1	46426.9	62560.6	47353	59247.9	59409.1	70826.8	55644	70905.7
sp|P11169|GTR3_HUMAN	P11169	P11169	SLC2A3	Solute carrier family 2, facilitated glucose transporter member 3	53	M	PM						7.96095e+09	10	7.96095e+08	0.58982	4.69553e+08	12.0639	10.3965	6.57351	8.41743	14.6843	18.5274	6111.53	7884.16	3128.45	4760.68	3053.3	5693.83	7086.43	12333	12927.4	15784.6
sp|P16150|LEUK_HUMAN	P16150	P16150	SPN	Leukosialin	38	M	PM		CS	XC			6.8953e+09	13	5.30408e+08	0.511296	2.71195e+08	6.96766	6.99824	6.23357	6.29347	8.41915	6.66887	5615.27	6463.9	5555.17	5498.54	4643.04	5185.07	7996.95	8612.36	7425.53	6920.12
sp|P35613|BASI_HUMAN	P35613	P35613	BSG	Basigin	20	M	PM						5.19951e+09	15	3.46634e+08	0.530948	1.84044e+08	4.72854	4.63449	4.3189	4.8953	4.8653	4.89328	5569.5	6297.91	5839.71	5604.96	4467.31	5933.8	6935.13	7322.37	6014.07	7470.5
sp|P08575|PTPRC_HUMAN	P08575	P08575	PTPRC	Receptor-type tyrosine-protein phosphatase C	137	M	PM		CS				1.40515e+10	58	2.42267e+08	0.492456	1.19306e+08	3.06526	3.3131	3.58512	2.44937	3.81704	2.1506	23180.4	22126.2	25190.6	22865.4	19867.3	14591	19979.5	28232.3	18917.7	16135.6
sp|P05107|ITB2_HUMAN	P05107	P05107	ITGB2	Integrin beta-2	111	M	PM		CS	XC			9.65361e+09	44	2.194e+08	0.524035	1.14974e+08	2.95395	4.35243	4.02244	2.37686	1.98679	2.21247	21313.4	27195.7	24400.9	24002.9	13840.2	13247.4	13737.2	13748.9	11836.7	15531.1
sp|P15144|AMPN_HUMAN	P15144	P15144	ANPEP	Aminopeptidase N	109	M	PM			XC			6.42875e+09	45	1.42861e+08	0.590385	8.4343e+07	2.16697	2.41811	3.29412	2.02899	1.82609	1.4309	11769.3	22284.8	20966	28991.9	10460.5	16679	16786.6	18638.1	10375.9	14814.8
sp|P32942|ICAM3_HUMAN	P32942	P32942	ICAM3	Intercellular adhesion molecule 3	44	M	PM						3.28803e+09	25	1.31521e+08	0.506162	6.65711e+07	1.71037	2.19369	2.10765	1.4283	1.37748	1.49456	8972.33	10907.3	9133.25	10007.9	7959.05	6334.6	8629.25	7585.33	7438.26	8348.5
sp|P05556|ITB1_HUMAN	P05556	P05556	ITGB1	Integrin beta-1	78	M	PM		CS				3.13959e+09	33	9.51391e+07	0.599774	5.7062e+07	1.46606	1.67494	1.69726	1.36895	1.29513	1.32919	10276.9	17922.4	12046.8	17344.1	9760.26	13066.1	10784.9	15348.3	10287.5	15978.7
sp|P08571|CD14_HUMAN	P08571	P08571	CD14	Monocyte differentiation antigen CD14	15	M	PM			XC			1311697169	16	8.19811e+07	0.644646	5.28488e+07	1.35781	1.79621	1.84969	1.71165	0.692157	0.924742	3113.63	5236.38	2896.27	5149.66	2080.7	4450.91	1435.25	2234.74	1554.22	3028.66
sp|P00738|HPT_HUMAN	P00738	P00738	HP	Haptoglobin	31					XC			2.07867e+09	20	1.03934e+08	0.500651	5.20344e+07	1.33689	1.83099	1.21562	2.60287	0.480842	0.838925	5500.97	6536.14	4203.38	4144.18	9661.95	8287.94	2929.11	1901.02	1875.31	3364.45
sp|P54709|AT1B3_HUMAN	P54709	P54709	ATP1B3	Sodium/potassium-transporting ATPase subunit beta-3	12	M	PM						1.12669e+09	12	9.38906e+07	0.534204	5.01567e+07	1.28865	1.86476	1.18485	0.981236	1.30575	1.09129	2969.43	4150.19	2554.87	2518.32	1946.25	1947.94	2840.32	3218.48	2387.73	2728.61
sp|Q8N386|LRC25_HUMAN	Q8N386	Q8N386	LRRC25	Leucine-rich repeat-containing protein 25	5	M						ShG	595123444	7	8.50176e+07	0.579467	4.92649e+07	1.26573	1.75661	2.00076	0.807736	0.822091	1.00497	947.666	1620.3	1197.71	1762.47	722.246	664.581	728.763	839.823	706.128	1041.42
sp|Q8N131|PORIM_HUMAN	Q8N131	Q8N131	TMEM123	Porimin	3	M	PM						281340145	2	1.4067e+08	0.343127	4.82677e+07	1.24011	1.07351	0.538822	1.38823	1.5888	1.52321	2415.18	1033.98	1386.27	495.629	1975.93	1192.69	3594.36	1694.82	2239.62	1648.24
sp|P05362|ICAM1_HUMAN	P05362	P05362	ICAM1	Intercellular adhesion molecule 1	45	M	PM		CS	XC			2.06559e+09	22	9.38903e+07	0.450841	4.23296e+07	1.08755	1.07959	0.785871	0.974335	1.23028	1.30027	6088.79	5844.76	5882.05	4063.15	8173.19	4705.15	8278.33	7376.61	7995.84	7908.49
sp|P68032|ACTC_HUMAN	P68032	P68032	ACTC1	Actin, alpha cardiac muscle 1	40	M				XC			1.66116e+09	20	8.30579e+07	0.497971	4.13604e+07	1.06265	0.661438	1.0633	1.45516	0.979419	1.18963	8012.68	5194.02	7748.2	7973.96	10284.4	10192.6	7625.69	8517.87	9047.79	10495
sp|P20701-2|ITAL_HUMAN	P20701-2	P20701	ITGAL	Isoform 2 of Integrin alpha-L	45	M	PM		CS				3.45566e+09	41	8.42843e+07	0.490011	4.13003e+07	1.0611	1.29851	1.24383	0.946818	0.950191	0.894531	9588.79	9637.13	11434	8815.96	5536.54	6267.98	7978.04	7810.19	7082.79	7458.52
sp|P26447|S10A4_HUMAN	P26447	P26447	S100A4	Protein S100-A4	7					XC	Nuc		3.95428e+08	6	6.59047e+07	0.52581	3.46534e+07	0.890328	0.808942	0.856385	1.05655	0.851568	0.897861	962.81	873.321	774.945	882.938	799.382	1017.43	822.486	1018.18	1042.06	1088.98
sp|P08514|ITA2B_HUMAN	P08514	P08514	ITGA2B	Integrin alpha-IIb	48	M	PM		CS				1.87598e+09	37	5.07023e+07	0.560081	2.83974e+07	0.729597	0.845425	0.834441	1.27186	0.316743	0.513828	6928.61	9060.22	4025.83	8540.13	11100.4	12158	3681.82	3759.4	5449.13	6186.38
sp|Q5QGZ9-1|CL12A_HUMAN	Q5QGZ9-1	Q5QGZ9	CLEC12A	Isoform 1 of C-type lectin domain family 12 member A	4	M	PM						7.36696e+08	12	6.13913e+07	0.458484	2.8147e+07	0.723163	1.47834	0.962139	0.616203	0.342221	0.308284	877.179	972.089	801.754	604.192	531.964	361.422	370.988	249.222	270.075	227.739
sp|P20702|ITAX_HUMAN	P20702	P20702	ITGAX	Integrin alpha-X	37	M	PM		CS				2.87953e+09	54	5.33247e+07	0.523297	2.79047e+07	0.716937	1.08343	0.853261	0.649721	0.494501	0.54748	7958.06	8623.06	7445.67	6485.55	3465.26	4612.59	3973.86	4358.87	3552.61	4895.34
sp|Q9Y336|SIGL9_HUMAN	Q9Y336	Q9Y336	SIGLEC9	Sialic acid-binding Ig-like lectin 9	25	M	PM						7.15336e+08	14	5.10954e+07	0.540295	2.76066e+07	0.70928	0.957797	1.10281	0.574233	0.459336	0.507162	3369.43	4788.87	4577.61	5265.83	2630.24	2560.98	2393.51	2543.54	2351.19	2848.79
sp|P68431|H31_HUMAN	P68431	P68431	HIST1H3A	Histone H3.1	12	M				XC	Nuc		2.10144e+08	4	5.25361e+07	0.503813	2.64684e+07	0.680036	0.285895	0.733225	0.803489	0.942988	0.628412	1978.77	914.659	2202.8	2240.24	2545.47	2292.93	2147.58	3341.22	2005.85	2258.66
sp|P12318|FCG2A_HUMAN	P12318	P12318	FCGR2A	Low affinity immunoglobulin gamma Fc region receptor II-a	15	M	PM						4.23708e+08	10	4.23708e+07	0.609791	2.58374e+07	0.663824	0.667684	0.379923	0.640916	0.876571	0.710182	3799.21	5149.83	2086.04	2798.48	2298.2	4409.42	4307.63	7487.84	4146.08	6153.85
sp|P78324-2|SHPS1_HUMAN	P78324-2	P78324	SIRPA	Isoform 2 of Tyrosine-protein phosphatase non-receptor type substrate 1	36	M	PM						1.34861e+09	25	5.39445e+07	0.465911	2.51334e+07	0.645736	0.696018	0.450528	0.865088	0.667745	0.571064	6960.78	7190.42	5652.14	4444.89	9487.3	7971.73	9497.23	7639.98	7234.41	6627.87
sp|P08648|ITA5_HUMAN	P08648	P08648	ITGA5	Integrin alpha-5	40	M	PM		CS				1.30464e+09	35	3.72754e+07	0.57201	2.13219e+07	0.547811	0.642819	0.581174	0.520776	0.519894	0.483868	4779.09	7597.07	5928.38	6559.46	4687.96	5489.92	4357.71	6804.87	4845.24	6424.49
sp|Q92536|YLAT2_HUMAN	Q92536	Q92536	SLC7A6	Y+L amino acid transporter 2	2	M	PM						4.76254e+08	11	4.32958e+07	0.476004	2.0609e+07	0.529494	0.671217	0.419672	0.457649	0.557147	0.52648	292.392	274.058	213.835	163.642	193.381	166.675	286.896	251.94	221.998	241.5
sp|Q08722|CD47_HUMAN	Q08722	Q08722	CD47	Leukocyte surface antigen CD47	10	M	PM						4.17159e+08	10	4.17159e+07	0.461973	1.92716e+07	0.495135	0.656323	0.420005	0.468887	0.51887	0.412965	3003.29	2842.54	2181.83	1737.19	1865.38	1811.4	3288.95	2488.83	2342.54	2009.35
sp|P06703|S10A6_HUMAN	P06703	P06703	S100A6	Protein S100-A6	6	M	PM				Nuc		1.89669e+08	5	3.79339e+07	0.494312	1.87512e+07	0.481763	0.335584	0.6018	0.771629	0.399272	0.361015	1923.76	1172.87	1771.05	2008.66	2085.95	2405.56	1657.34	1545.49	1308.77	1417.52
sp|P07355-2|ANXA2_HUMAN	P07355-2	P07355	ANXA2	Isoform 2 of Annexin A2	29	M	PM		CS	XC	Nuc		8.38194e+08	23	3.64432e+07	0.471464	1.71817e+07	0.441438	0.389304	0.468652	0.545669	0.444357	0.379077	5805.64	4332.69	5415.65	4981.09	4968.84	5416.97	5967.75	5477.08	5809.64	4739.71
sp|Q8NHL6-3|LIRB1_HUMAN	Q8NHL6-3	Q8NHL6	LILRB1	Isoform 3 of Leukocyte immunoglobulin-like receptor subfamily B member 1	51	M	PM			XC			9.50084e+08	26	3.65417e+07	0.452441	1.6533e+07	0.424771	0.521688	0.457667	0.362206	0.442064	0.343168	11817.7	11281.8	13026.7	9451.95	9123.03	6986.86	13755.1	10587.7	8729.6	8337.37
sp|P21730|C5AR1_HUMAN	P21730	P21730	C5AR1	C5a anaphylatoxin chemotactic receptor 1	10	M	PM		CS				2.62978e+08	11	2.39071e+07	0.684707	1.63694e+07	0.420568	0.411888	0.588244	0.840632	0.144437	0.224454	1675.09	4081.4	3020.72	5566.62	2394.3	7430.08	1044.83	1585.09	1609.64	2498.69
sp|P11215-2|ITAM_HUMAN	P11215-2	P11215	ITGAM	Isoform 2 of Integrin alpha-M	68	M	PM		CS	XC	Nuc		1.79007e+09	56	3.19656e+07	0.504536	1.61278e+07	0.414362	0.74404	0.659462	0.33834	0.188869	0.195212	12689.8	15955.9	15701.3	13505.8	6727.62	6471.96	5667.69	4485.73	3524.57	4703.1
sp|P62805|H4_HUMAN	P62805	P62805	HIST1H4A	Histone H4	19	M				XC	Nuc		1.39626e+08	6	2.3271e+07	0.631356	1.46923e+07	0.37748	0.231196	0.411957	0.520855	0.377347	0.364676	2142.98	1500.88	1460.93	2554.01	1576.05	3016.07	923.754	2713.03	1162.05	2659.67
sp|P08637|FCG3A_HUMAN	P08637	P08637	FCGR3A	Low affinity immunoglobulin gamma Fc region receptor III-A	8	M	PM						1.39779e+08	7	1.99684e+07	0.692649	1.38311e+07	0.355355	0.563684	0.520092	0.303435	0.142553	0.280886	985.284	2471.7	1188.49	2177.93	514.446	1186.81	423.479	692.282	399.294	1383.71
sp|P24071|FCAR_HUMAN	P24071	P24071	FCAR	Immunoglobulin alpha Fc receptor	5	M	PM			XC			2.30418e+08	11	2.09471e+07	0.622583	1.30413e+07	0.335063	0.432465	0.455882	0.254692	0.2561	0.287317	412.237	1009.45	640.546	1016.23	423.454	530.282	472.925	662.051	458.374	753.442
sp|Q9NP99|TREM1_HUMAN	Q9NP99	Q9NP99	TREM1	Triggering receptor expressed on myeloid cells 1	12	M	PM			XC			3.19903e+08	15	2.13269e+07	0.600529	1.28074e+07	0.329052	0.429925	0.404723	0.208811	0.309665	0.289519	2518.39	4692.95	1617.61	4219.07	2440.95	2033.13	2265.21	3743.63	3290.58	3550.47
sp|P16284|PECA1_HUMAN	P16284	P16284	PECAM1	Platelet endothelial cell adhesion molecule	46	M	PM			XC			9.82541e+08	43	2.28498e+07	0.545608	1.2467e+07	0.320308	0.42237	0.43649	0.369425	0.159848	0.249884	8606.85	10679.7	8188.32	10540.1	7089.75	8332.05	4913.42	4476.34	5452.7	7098.39
sp|P04839|CY24B_HUMAN	P04839	P04839	CYBB	Cytochrome b-245 heavy chain	31	M	PM						7.92795e+08	27	2.93628e+07	0.400111	1.17484e+07	0.301844	0.291111	0.221354	0.287613	0.396935	0.297375	8799.28	6205.58	8395.97	4506.27	7848.05	5468.79	12531.6	9371.12	11412.8	7121.7
sp|P32249|GP183_HUMAN	P32249	P32249	GPR183	G-protein coupled receptor 183	13	M	PM						2.48204e+08	15	1.65469e+07	0.657052	1.08722e+07	0.279333	0.3202	0.236764	0.292956	0.236348	0.3107	1092.51	2200.27	846.035	1553.73	723.074	1795.62	993.87	1798.69	1431.9	2398.56
sp|Q9UKJ1|PILRA_HUMAN	Q9UKJ1	Q9UKJ1	PILRA	Paired immunoglobulin-like type 2 receptor alpha	13	M	PM						2.95712e+08	12	2.46427e+07	0.424597	1.04632e+07	0.268824	0.28766	0.296655	0.225589	0.279164	0.252536	1720.09	1561.48	2394.74	1537.85	1733.57	1092.28	2431.42	1678.28	1761.98	1540.06
sp|O60603|TLR2_HUMAN	O60603	O60603	TLR2	Toll-like receptor 2	36	M	PM		CS				8.29378e+08	44	1.88495e+07	0.543851	1.02513e+07	0.263381	0.292671	0.270464	0.304581	0.213261	0.247984	7759.43	9183.11	7426.53	8104.46	5959.38	8524.53	5595.6	7410.87	8456.38	8741.55
sp|Q9NRM0|GTR9_HUMAN	Q9NRM0	Q9NRM0	SLC2A9	Solute carrier family 2, facilitated glucose transporter member 9	3	M	PM						3.27027e+08	16	2.04392e+07	0.470759	9.62192e+06	0.24721	0.356136	0.187629	0.211148	0.270995	0.206086	915.317	869.818	578.766	437.64	521.637	460	810.263	733.028	620.863	565.477
sp|P05090|APOD_HUMAN	P05090	P05090	APOD	Apolipoprotein D	12					XC			1.63793e+08	9	1.81993e+07	0.51549	9.38153e+06	0.241034	0.374507	0.204942	0.274464	0.160706	0.205554	1432.52	2458.14	1075.41	1284.65	2790.31	1606.9	1250.09	1168.22	1002.54	1515.75
sp|Q12913|PTPRJ_HUMAN	Q12913	Q12913	PTPRJ	Receptor-type tyrosine-protein phosphatase eta	47	M	PM		CS				1.15067e+09	56	2.05476e+07	0.456057	9.37087e+06	0.24076	0.213368	0.243097	0.261108	0.260472	0.22757	7447.82	6751.5	9043.13	7346.09	8446.93	7369.71	10908.1	9128.1	10294.2	8089.86
sp|Q9UGN4|CLM8_HUMAN	Q9UGN4	Q9UGN4	CD300A	CMRF35-like molecule 8	14	M	PM						1.62823e+08	10	1.62823e+07	0.54618	8.89304e+06	0.228484	0.165699	0.19635	0.249554	0.295379	0.229009	1878.6	2107.9	2563.99	2385.42	1887.28	2831.74	3314.11	4161.57	2619.73	3272.94
sp|P11279|LAMP1_HUMAN	P11279	P11279	LAMP1	Lysosome-associated membrane glycoprotein 1	12	M	PM						3.1645e+08	19	1.66553e+07	0.509786	8.49061e+06	0.218144	0.285305	0.136992	0.164728	0.212467	0.275355	6399.72	4424.94	1540.46	2029.08	1785.25	2278.9	3797.02	3649.54	2998.28	4797.84
sp|P15529-2|MCP_HUMAN	P15529-2	P15529	CD46	Isoform B of Membrane cofactor protein	14	M	PM		CS				2.35228e+08	13	1.80945e+07	0.462932	8.37652e+06	0.215213	0.241446	0.299791	0.196691	0.175389	0.173929	2742.76	2791.87	3996.54	3310.53	3053.34	2028.69	2716.63	2246.08	2151.04	2259.45
sp|P50281|MMP14_HUMAN	P50281	P50281	MMP14	Matrix metalloproteinase-14	12	M	PM			XC			3.24277e+08	21	1.54418e+07	0.533897	8.2443e+06	0.211816	0.169622	0.0943957	0.181959	0.3017	0.284285	1560.39	1805.55	1224.66	959.589	1562.67	1727.67	2965.26	3556.73	2682.42	3399.67
sp|P30273|FCERG_HUMAN	P30273	P30273	FCER1G	High affinity immunoglobulin epsilon receptor subunit gamma	4	M	PM		CS				4.43467e+07	3	1.47822e+07	0.522977	7.73078e+06	0.198622	0.163507	0.132871	0.231925	0.267765	0.19117	568.29	669.631	503.633	519.678	632.711	847.239	1084.33	1214.51	978.71	879.579
sp|P26038|MOES_HUMAN	P26038	P26038	MSN	Moesin	16	M	PM			XC	Nuc		5.46349e+08	34	1.60691e+07	0.478445	7.68818e+06	0.197528	0.147324	0.221189	0.309168	0.193651	0.137285	3867.1	2651.29	3990.77	3801.48	4554.56	4962.92	3647.68	3859.69	3617.36	2775.63
sp|Q8N423|LIRB2_HUMAN	Q8N423	Q8N423	LILRB2	Leukocyte immunoglobulin-like receptor subfamily B member 2	25	M	PM		CS	XC			4.32787e+08	26	1.66457e+07	0.396181	6.5947e+06	0.169434	0.10963	0.18381	0.10892	0.237765	0.191129	4765.42	3262.12	9071.06	5223.28	4387.04	2890.93	12397.3	7835.49	8397.7	6389.29
sp|Q9NY15|STAB1_HUMAN	Q9NY15	Q9NY15	STAB1	Stabilin-1	14	M	PM						1.38218e+09	110	1.25653e+07	0.499856	6.28084e+06	0.16137	0.1671	0.165527	0.199351	0.141089	0.142574	1655.03	1527.66	1478.07	1445.18	1923.18	1625.65	1249.5	1428.53	1189.92	1464.35
sp|Q92692|NECT2_HUMAN	Q92692	Q92692	NECTIN2	Nectin-2	18	M	PM		CS				3.1202e+08	21	1.48581e+07	0.419519	6.23326e+06	0.160147	0.187435	0.1517	0.144814	0.151952	0.163292	3796.47	3015.27	3474.17	2330.59	3309.84	2078	3977.87	2707.26	3543.4	2951.19
sp|P19440|GGT1_HUMAN	P19440	P19440	GGT1	Gamma-glutamyltranspeptidase 1	23	M	PM			XC			2.87917e+08	23	1.25181e+07	0.493431	6.17684e+06	0.158698	0.208318	0.118753	0.16363	0.174397	0.129093	7212.06	7392.69	4582.7	4024.6	5193.44	5179.61	7509.24	6854.27	4861.87	5146.75
sp|Q10588|BST1_HUMAN	Q10588	Q10588	BST1	ADP-ribosyl cyclase/cyclic ADP-ribose hydrolase 2	7	M	PM						2.301e+08	19	1.21106e+07	0.50358	6.09864e+06	0.156689	0.226207	0.0976003	0.162269	0.122748	0.174067	5218.46	4562.96	1819.56	1880.17	2395.57	2919.67	3178.68	2742.22	3209.2	3944.67
sp|Q8N370-3|LAT4_HUMAN	Q8N370-3	Q8N370	SLC43A2	Isoform 3 of Large neutral amino acids transporter small subunit 4	12	M	PM						1.26072e+08	13	9.69783e+06	0.6247	6.05824e+06	0.155651	0.181406	0.115863	0.166646	0.15525	0.158212	2148.39	3746.47	1451.51	2285.19	1418.24	3069.91	2421.54	3551	2366.9	3670.85
sp|Q9Y286|SIGL7_HUMAN	Q9Y286	Q9Y286	SIGLEC7	Sialic acid-binding Ig-like lectin 7	7	M	PM						1.65952e+08	15	1.10635e+07	0.5197	5.7497e+06	0.147724	0.186589	0.167913	0.106062	0.143492	0.133217	1044.15	1324.95	1091.91	1138.68	753.759	671.789	1145.33	1128.46	887.644	1062.74
sp|P63000-2|RAC1_HUMAN	P63000-2	P63000	RAC1	Isoform B of Ras-related C3 botulinum toxin substrate 1	8	M	PM						98066427	8	1.22583e+07	0.464132	5.68947e+06	0.146176	0.117817	0.165823	0.16593	0.144493	0.140693	1643.33	1517.78	2079.27	2040.09	2525.7	1906.71	2090.15	2061.56	2701.87	2036.23
sp|P19256|LFA3_HUMAN	P19256	P19256	CD58	Lymphocyte function-associated antigen 3	5	M	PM		CS				8.34211e+07	7	1.19173e+07	0.47663	5.68015e+06	0.145937	0.205199	0.144721	0.126597	0.138335	0.117068	1323.79	1445.53	1195.89	973.621	958.099	795.488	1402.67	1079.28	851.907	926.504
sp|P02749|APOH_HUMAN	P02749	P02749	APOH	Beta-2-glycoprotein 1	8				CS	XC			1.81605e+08	17	1.06827e+07	0.527117	5.63102e+06	0.144674	0.250307	0.196883	0.17769	0.0518055	0.0716066	1040.45	1801.51	973.08	1353.25	1931.02	1140.73	479.503	412.94	319.344	578.99
sp|Q8TDQ1-6|CLM1_HUMAN	Q8TDQ1-6	Q8TDQ1	CD300LF	Isoform 6 of CMRF35-like molecule 1	14	M	PM						1.07045e+08	10	1.07045e+07	0.510179	5.46124e+06	0.140312	0.207195	0.184215	0.138521	0.0976886	0.0868997	2177.55	2809.34	2398.49	2385.37	1829.31	1675.33	1747.75	1466.96	1122.12	1323.73
sp|Q93033|IGSF2_HUMAN	Q93033	Q93033	CD101	Immunoglobulin superfamily member 2	45	M	PM						5.54104e+08	54	1.02612e+07	0.516332	5.29818e+06	0.136123	0.128614	0.206697	0.14251	0.0915697	0.121665	7353.81	8940.5	12625.2	13721.9	8480.89	8836.46	8326.34	7049.76	8224.15	9501.54
sp|P13987|CD59_HUMAN	P13987	P13987	CD59	CD59 glycoprotein	3	M	PM		CS	XC			4.8663e+07	6	8.11049e+06	0.633984	5.14193e+06	0.132108	0.155455	0.0742489	0.057821	0.160824	0.191185	530.171	908.344	248.762	414.326	297.984	301.363	477.782	1040.75	708.315	1255.04
sp|P16671|CD36_HUMAN	P16671	P16671	CD36	Platelet glycoprotein 4	10	M	PM		CS	XC			1.54172e+08	16	9.63575e+06	0.525241	5.06109e+06	0.130032	0.184516	0.195531	0.136635	0.039964	0.109402	2553.42	2863.47	2634.22	2897.88	1639.39	1891.38	859.757	686.872	1575.36	1907.39
sp|P15509-7|CSF2R_HUMAN	P15509-7	P15509	CSF2RA	Isoform 7 of Granulocyte-macrophage colony-stimulating factor receptor subunit alpha	9	M	PM			XC			2.0046e+08	19	1.05505e+07	0.461762	4.87183e+06	0.125169	0.145557	0.163567	0.160646	0.0810961	0.0896608	1269.93	1105.76	1453.29	1186.66	1143.71	1088.57	1067.96	682.3	693.308	765.218
sp|P04083|ANXA1_HUMAN	P04083	P04083	ANXA1	Annexin A1	24	M	PM		CS	XC	Nuc		174822823	19	9.2012e+06	0.526925	4.84834e+06	0.124566	0.120267	0.121615	0.163982	0.108171	0.115767	4290.38	4023.31	3000.11	3885.34	3684.87	4893.21	3467.1	4007.71	4555.46	4350.88
sp|Q9NY25|CLC5A_HUMAN	Q9NY25	Q9NY25	CLEC5A	C-type lectin domain family 5 member A	10	M	PM		CS				7.22966e+07	12	6.02472e+06	0.80022	4.8211e+06	0.123866	0.1056	0.277497	0.116351	0.0650378	0.0734861	255.763	1302.98	548.66	3269.91	422.779	1280.57	320.531	888.764	389.828	1018.67
sp|P04217|A1BG_HUMAN	P04217	P04217	A1BG	Alpha-1B-glycoprotein	8					XC			1.30304e+08	15	8.68696e+06	0.54293	4.71641e+06	0.121176	0.212814	0.172933	0.196947	0.0253261	0.0299407	1103.31	1997.32	1317.2	1550	1920.01	1648.76	270.198	263.248	251.021	315.692
sp|P09326|CD48_HUMAN	P09326	P09326	CD48	CD48 antigen	13	M	PM						1.14066e+08	12	9.5055e+06	0.486441	4.62386e+06	0.118798	0.206283	0.136577	0.0841397	0.0870267	0.0846515	3942.61	4453.97	3186.15	2816.23	2439.94	1620.48	2246.41	2081.06	1936.15	2053.4
sp|Q9NQS5|GPR84_HUMAN	Q9NQS5	Q9NQS5	GPR84	G-protein coupled receptor 84	13	M	PM						1.72788e+08	16	1.07992e+07	0.390637	4.21858e+06	0.108385	0.10513	0.0842562	0.109786	0.141939	0.0976049	4074.14	2118.55	3778.79	1621.51	2383.92	1973.41	3688.93	3167.84	3375.42	2209.73
sp|Q14242-2|SELPL_HUMAN	Q14242-2	Q14242	SELPLG	Isoform 2 of P-selectin glycoprotein ligand 1	6	M	PM						8.64998e+07	10	8.64998e+06	0.472122	4.08384e+06	0.104924	0.0760457	0.0875531	0.144679	0.100135	0.118551	1282.13	990.45	1640.71	1089.02	1688.77	1680.82	1447.51	1444.42	1699.78	1734.67
sp|P19397|CD53_HUMAN	P19397	P19397	CD53	Leukocyte surface antigen CD53	8	M	PM		CS				4.95004e+07	7	7.07148e+06	0.567726	4.01467e+06	0.103146	0.160228	0.11459	0.0683523	0.090488	0.0827135	1267.04	2158.31	1113.37	1474.1	986.835	821.27	1116.69	1349.94	888.083	1251.72
sp|P08174-7|DAF_HUMAN	P08174-7	P08174	CD55	Isoform 7 of Complement decay-accelerating factor	17	M	PM		CS	XC			2.40544e+08	30	8.01813e+06	0.495297	3.97135e+06	0.102034	0.119472	0.130503	0.0503105	0.0809101	0.124201	3355.13	3709.48	2764.27	3869.66	2513.44	1393.36	3341.94	2782.26	4417.92	4332.4
sp|P14209|CD99_HUMAN	P14209	P14209	CD99	CD99 antigen	8	M	PM						3.20433e+07	4	8.01084e+06	0.493841	3.95608e+06	0.101641	0.158672	0.0754033	0.0879868	0.0573274	0.127707	1368.65	1482.51	758.896	672.811	606.989	733.286	828.335	593.209	1379.73	1340.5
sp|P02765|FETUA_HUMAN	P02765	P02765	AHSG	Alpha-2-HS-glycoprotein	6					XC			1.08475e+08	13	8.34421e+06	0.473507	3.95104e+06	0.101512	0.185448	0.095775	0.110772	0.0629942	0.0622934	1519.75	2509.44	1106.37	1237.69	2815.47	1337.04	1537.97	944.066	776.222	947.001
sp|P08670|VIME_HUMAN	P08670	P08670	VIM	Vimentin	25	M	PM						2.56789e+08	32	8.02466e+06	0.487804	3.91446e+06	0.100572	0.0667197	0.13319	0.176179	0.0848423	0.0584533	5077.01	3523.15	6291.17	6716.66	8338.14	8298.3	4404.03	4961.77	4205.73	3467.69
sp|P04075-2|ALDOA_HUMAN	P04075-2	P04075	ALDOA	Isoform 2 of Fructose-bisphosphate aldolase A	5	M				XC	Nuc		1.79507e+08	22	8.1594e+06	0.465031	3.79437e+06	0.0974865	0.0747495	0.127081	0.174131	0.0932696	0.0358716	1540.77	877.106	1399.11	1424.06	1454.84	1822.55	1282.76	1212.08	1004.79	472.878
sp|P60903|S10AA_HUMAN	P60903	P60903	S100A10	Protein S100-A10	1	M	PM						30412168	4	7603042	0.483494	3.67602e+06	0.0944458	0.0782107	0.119201	0.192465	0.0999643	0.00458871	338.471	226.492	371.298	329.665	315.865	497.163	242.559	320.612	215.5	14.9291
sp|P05141|ADT2_HUMAN	P05141	P05141	SLC25A5	ADP/ATP translocase 2	8	M	PM				Nuc		1.45742e+08	19	7.67064e+06	0.476465	3.65479e+06	0.0939003	0.0770092	0.0965364	0.120242	0.0964483	0.083268	1482.99	1264.05	1388.43	1513.27	1754.39	1760.5	1979.82	1753.33	1994.24	1535.51
sp|P11021|GRP78_HUMAN	P11021	P11021	HSPA5	78 kDa glucose-regulated protein	21	M	PM		CS		Nuc		2.35939e+08	32	7.37309e+06	0.493409	3.63795e+06	0.0934677	0.0705465	0.0765784	0.113673	0.104442	0.101366	5394.52	4749.08	4559.51	4923.17	6849.03	6825.72	8464.27	7786.78	7537.22	7666.23
sp|P34910-2|EVI2B_HUMAN	P34910-2	P34910	EVI2B	Isoform 2 of Protein EVI2B	14	M	PM						1.2353e+08	16	7.72064e+06	0.470707	3.63416e+06	0.0933703	0.0937866	0.0893256	0.0930141	0.105156	0.0851025	1818.13	1728.88	1896.04	1572.56	1678.43	1529.44	2403.06	2146.87	2032.41	1762.47
sp|P58335|ANTR2_HUMAN	P58335	P58335	ANTXR2	Anthrax toxin receptor 2	8	M	PM			XC			1.31731e+08	22	5.98775e+06	0.578179	3.46199e+06	0.0889469	0.118074	0.0837941	0.0934065	0.0718558	0.0807085	1534.44	1974.6	1127.03	1338.27	722.203	1393.35	990.354	1330.87	1136.73	1516.35
sp|P23528|COF1_HUMAN	P23528	P23528	CFL1	Cofilin-1	7	M				XC	Nuc		7.183e+07	10	7.183e+06	0.472188	3.39173e+06	0.0871417	0.0736536	0.0990153	0.152979	0.0884373	0.0355044	2442.62	1846.04	2601.77	2370.03	2807.37	3420.08	2395.14	2454.88	2150.36	999.734
sp|P49961-6|ENTP1_HUMAN	P49961-6	P49961	ENTPD1	Isoform 6 of Ectonucleoside triphosphate diphosphohydrolase 1	14	M	PM						1.33959e+08	19	7.05048e+06	0.47788	3.36928e+06	0.086565	0.129209	0.084799	0.0754235	0.0781935	0.0672066	2999.65	3084.53	2177.26	1933.26	1636.99	1606.05	2596.56	2067.35	2054.62	1802.44
sp|Q8NBI5-2|S43A3_HUMAN	Q8NBI5-2	Q8NBI5	SLC43A3	Isoform 2 of Solute carrier family 43 member 3	7	M						ShG	94386576	15	6.29244e+06	0.531917	3.34706e+06	0.0859939	0.0905116	0.072472	0.0805684	0.0960572	0.0878545	2452.34	2832.37	2201.58	2165.81	1922.67	2248.89	2991.9	3329.07	2456.37	3088.62
sp|P20333|TNR1B_HUMAN	P20333	P20333	TNFRSF1B	Tumor necrosis factor receptor superfamily member 1B	5	M	PM			XC	Nuc		6.08223e+07	11	5.5293e+06	0.601223	3.32434e+06	0.0854104	0.0644829	0.0340276	0.059681	0.124073	0.130031	513.422	646.941	340.744	326.03	408.909	534.091	679.032	1378.63	944.011	1465.62
sp|Q15722|LT4R1_HUMAN	Q15722	Q15722	LTB4R	Leukotriene B4 receptor 1	3	M	PM						80289551	13	6.17612e+06	0.513763	3.17306e+06	0.0815236	0.0814032	0.0739588	0.0958494	0.0846405	0.0736145	672.952	719.372	725.16	624.177	601.915	755.544	763.167	828.396	699.142	730.855
sp|P04406|G3P_HUMAN	P04406	P04406	GAPDH	Glyceraldehyde-3-phosphate dehydrogenase	16	M	PM				Nuc		1.16888e+08	17	6.87579e+06	0.460734	3.16791e+06	0.0813911	0.0596574	0.0819902	0.100183	0.0815885	0.0851126	6125.73	3185.98	4603.57	4181.62	5210.62	4772.33	5403.06	4825.64	4491.35	5106.54
sp|Q6PCB8|EMB_HUMAN	Q6PCB8	Q6PCB8	EMB	Embigin	8	M	PM						8.90858e+07	14	6.36327e+06	0.49669	3.16057e+06	0.0812026	0.131031	0.0788453	0.0640849	0.0661236	0.0673093	2515.32	3271.96	2144.68	1880.24	1765.17	1427.4	2246.39	1828.68	1762.25	1888.27
sp|Q9Y624|JAM1_HUMAN	Q9Y624	Q9Y624	F11R	Junctional adhesion molecule A	15	M	PM						9.17593e+07	15	6.11729e+06	0.50932	3.11565e+06	0.0800486	0.112238	0.0689015	0.0999092	0.0579069	0.066931	3850.75	4407.86	2595.5	2584.18	3558.79	3499.87	2868.96	2518.64	2505.39	2953.05
sp|Q06830|PRDX1_HUMAN	Q06830	Q06830	PRDX1	Peroxiredoxin-1	7					XC	Nuc		9.50349e+07	14	6.78821e+06	0.438999	2.98002e+06	0.0765638	0.0433141	0.0937492	0.10969	0.0656867	0.0759723	1326.27	648.68	1354.67	1340.83	1783.56	1465.3	1558.88	1089.5	1417.31	1278.24
sp|Q86VB7-2|C163A_HUMAN	Q86VB7-2	Q86VB7	CD163	Isoform 2 of Scavenger receptor cysteine-rich type 1 protein M130	26	M	PM			XC			3.28907e+08	51	6.44915e+06	0.459141	2.96107e+06	0.0760769	0.0455733	0.0604396	0.0550436	0.126512	0.0835019	4916.9	2373.74	4657.61	3006.42	3655.07	2557.33	5852.24	7297.96	4621.15	4886.23
sp|Q8NHJ6-3|LIRB4_HUMAN	Q8NHJ6-3	Q8NHJ6	LILRB4	Isoform 3 of Leukocyte immunoglobulin-like receptor subfamily B member 4	22	M	PM						1.58043e+08	17	9.29666e+06	0.312225	2.90265e+06	0.0745759	0.103879	0.105037	0.0533136	0.0669598	0.0469886	5942.71	2972.83	6477.45	2870.73	3380.98	1360.94	4864.39	2122.29	3207.67	1510.75
sp|P08195-4|4F2_HUMAN	P08195-4	P08195	SLC3A2	Isoform 4 of 4F2 cell-surface antigen heavy chain	14	M	PM		CS		Nuc		1.62128e+08	28	5.79027e+06	0.496637	2.87566e+06	0.0738826	0.0889602	0.0540272	0.0701005	0.083192	0.0711658	2593.16	2672.49	1848.13	1550.02	1579.34	1878.45	2695.7	2767.9	2707.04	2401.86
sp|P20138|CD33_HUMAN	P20138	P20138	CD33	Myeloid cell surface antigen CD33	13	M	PM						8.71457e+07	15	5.80971e+06	0.492848	2.86331e+06	0.0735652	0.0993197	0.0952891	0.0861095	0.0520085	0.0434651	1881.95	2088.28	2133.37	1913.38	1573.47	1614.96	1559.95	1211.08	933.622	1026.71
sp|P25942|TNR5_HUMAN	P25942	P25942	CD40	Tumor necrosis factor receptor superfamily member 5	7	M	PM		CS	XC			1.11075e+08	12	9.25624e+06	0.306805	2.83986e+06	0.0729628	0.0880635	0.0589517	0.047207	0.1019	0.0633545	1267.44	727.818	1063.35	465.295	1743.99	348.01	1756.61	932.716	1087.1	588.246
sp|Q9NV96|CC50A_HUMAN	Q9NV96	Q9NV96	TMEM30A	Cell cycle control protein 50A	9	M	PM						8.73049e+07	15	5.82032e+06	0.481066	2.79996e+06	0.0719377	0.0743974	0.0598915	0.0759287	0.0816008	0.0672935	1517.33	1288.87	1204.15	990.881	1079.25	1173.32	1702.87	1565.65	1322.98	1309.72
sp|P06733|ENOA_HUMAN	P06733	P06733	ENO1	Alpha-enolase	12	M	PM			XC	Nuc		1.25226e+08	22	5.69207e+06	0.485085	2.76114e+06	0.0709403	0.0557635	0.0777055	0.117209	0.0725535	0.0403723	2391.26	1570.57	2216.21	2090.08	2280.92	2944.59	1964.59	2263.15	1916.78	1277.45
sp|P05106|ITB3_HUMAN	P05106	P05106	ITGB3	Integrin beta-3	34	M	PM		CS		Nuc		1.74831e+08	35	4.99517e+06	0.551336	2.75401e+06	0.0707572	0.101274	0.0782521	0.0965985	0.0333536	0.0535786	5350.37	8256.43	2771.13	6092.49	8815.23	7024.62	2834.35	3011.51	4066.35	4907.28
sp|Q04941|PLP2_HUMAN	Q04941	Q04941	PLP2	Proteolipid protein 2	4	M	PM						2.71425e+07	5	5.4285e+06	0.494005	2.68171e+06	0.0688994	0.0705323	0.0595323	0.0893745	0.034878	0.0926907	844.769	648.906	494.163	523.06	714.437	733.442	376.817	355.38	866.772	958.043
sp|Q9NZQ7|PD1L1_HUMAN	Q9NZQ7	Q9NZQ7	CD274	Programmed cell death 1 ligand 1	13	M	PM						1.50338e+08	18	8.35209e+06	0.317964	2.65566e+06	0.0682303	0.0743816	0.0227273	0.0381661	0.118758	0.0754949	4514.76	1694.79	2149.19	494.54	2153.58	775.685	4306.62	2996.81	3809.32	1932.51
sp|P62937|PPIA_HUMAN	P62937	P62937	PPIA	Peptidyl-prolyl cis-trans isomerase A	10	M				XC	Nuc		5.70573e+07	10	5.70573e+06	0.465048	2.65344e+06	0.0681733	0.0506377	0.088148	0.103584	0.0571505	0.0495538	1983.16	1412.09	2279.61	2347.51	2897.43	2576.55	1917.09	1765.05	2027.48	1552.46
sp|O15439|MRP4_HUMAN	O15439	O15439	ABCC4	Multidrug resistance-associated protein 4	5	M	PM						3.66047e+08	69	5.30502e+06	0.499658	2.6507e+06	0.0681028	0.0619548	0.0529255	0.0815846	0.0635054	0.0803047	1844.89	1812.27	1654.84	1478.49	2001.62	2128.7	2034.53	2057.34	2593.77	2639.02
sp|O43315|AQP9_HUMAN	O43315	O43315	AQP9	Aquaporin-9	4	M	PM						3.50533e+07	6	5.84222e+06	0.452218	2.64196e+06	0.0678783	0.0859142	0.0443489	0.0547958	0.0896577	0.0607426	3078.77	2221.69	1716.21	1095.23	1313.79	1263.93	2501.95	2567.75	2186.12	1764.68
sp|P31949|S10AB_HUMAN	P31949	P31949	S100A11	Protein S100-A11	2					XC	Nuc		26098965	5	5219793	0.472744	2.46763e+06	0.0633992	0.0443154	0.0935719	0.101555	0.0486539	0.038979	321.793	227.073	420.279	457.89	544.662	464.163	285.676	276.107	267.427	224.386
sp|P02787|TRFE_HUMAN	P02787	P02787	TF	Serotransferrin	23	M	PM		CS	XC			1.9232e+08	40	4.808e+06	0.510888	2.45635e+06	0.0631094	0.116746	0.0635924	0.0890955	0.0285898	0.0283544	9892.35	12513.1	6070.63	6509.29	10279.9	8517.99	4110.83	3393.76	2530.71	3414.27
sp|Q03405|UPAR_HUMAN	Q03405	Q03405	PLAUR	Urokinase plasminogen activator surface receptor	10	M	PM						6.4231e+07	17	3.77829e+06	0.634085	2.39576e+06	0.0615528	0.081945	0.0687119	0.0384919	0.0524964	0.0645534	751.725	2139.87	656.777	1713.57	875.034	896.588	892.1	1518.24	1534.5	1893.82
sp|Q13740-2|CD166_HUMAN	Q13740-2	Q13740	ALCAM	Isoform 2 of CD166 antigen	13	M	PM						1.40365e+08	27	5.19871e+06	0.46072	2.39515e+06	0.0615372	0.080418	0.0931407	0.0546356	0.0402402	0.0443404	2892.36	3575.92	4657.9	3955.3	3377.09	2167.05	2917.35	1981.72	2419.7	2215.08
sp|P02656|APOC3_HUMAN	P02656	P02656	APOC3	Apolipoprotein C-III	2					XC			2.2521e+07	6	3.75349e+06	0.632479	2.37401e+06	0.0609939	0.0553241	0.111543	0.152317	0.00516361	0.00560129	334.289	558.084	659.239	1074.57	708.396	1370.54	69.6891	57.6882	43.888	63.4787
sp|P20645|MPRD_HUMAN	P20645	P20645	M6PR	Cation-dependent mannose-6-phosphate receptor	10	M	PM						6.68493e+07	15	4.45662e+06	0.518958	2.3128e+06	0.0594213	0.0610612	0.025668	0.0464238	0.0778259	0.0788304	2018.39	2029.29	846.786	814.662	1504.4	1376.19	2361.84	2864.52	2563.86	2943.26
sp|Q8IYS5-3|OSCAR_HUMAN	Q8IYS5-3	Q8IYS5	OSCAR	Isoform 3 of Osteoclast-associated immunoglobulin-like receptor	4	M	PM			XC			5.09795e+07	10	5.09795e+06	0.451079	2.29958e+06	0.0590817	0.0612323	0.0480088	0.0582742	0.0551355	0.0711116	514.611	401.724	515.31	300.797	372.561	341.021	517.153	400.614	475.588	524.134
sp|O75022-2|LIRB3_HUMAN	O75022-2	O75022	LILRB3	Isoform 2 of Leukocyte immunoglobulin-like receptor subfamily B member 3	10	M	PM						1.12294e+08	21	5.34732e+06	0.415311	2.2208e+06	0.0570577	0.0809673	0.064869	0.026968	0.0561183	0.0539518	2595.75	1819.71	2106.5	1392.31	749.935	540.628	2074.72	1396.83	1640.5	1362.24
sp|P43119|PI2R_HUMAN	P43119	P43119	PTGIR	Prostacyclin receptor	3	M	PM						5.02804e+07	10	5.02804e+06	0.43807	2.20264e+06	0.056591	0.0497259	0.0495154	0.049018	0.0647723	0.0666638	866.554	554.205	782.077	527.027	668.203	487.306	921.248	799.512	870.219	834.704
sp|P17813|EGLN_HUMAN	P17813	P17813	ENG	Endoglin	10	M	PM		CS	XC			6.93453e+07	20	3.46726e+06	0.627885	2.17704e+06	0.0559335	0.088063	0.0943489	0.0377559	0.0278092	0.0368366	1101.59	2633.19	1226.07	2694.2	1222.77	1007.01	834.884	920.928	647.899	1237.44
sp|P05023-4|AT1A1_HUMAN	P05023-4	P05023	ATP1A1	Isoform 4 of Sodium/potassium-transporting ATPase subunit alpha-1	25	M	PM			XC			1.94113e+08	45	4.31361e+06	0.504642	2.17683e+06	0.055928	0.0459227	0.0444088	0.0624924	0.0630511	0.0623919	2660.28	2921.35	2748.58	2697.93	3620.42	3546.03	4202.58	4442.19	4502.29	4459.02
sp|P30511-3|HLAF_HUMAN	P30511-3	P30511	HLA-F	Isoform 3 of HLA class I histocompatibility antigen, alpha chain F	4	M	PM		CS				130069856	20	6.50349e+06	0.334571	2.17588e+06	0.0559035	0.0499087	0.0474274	0.0524969	0.0573233	0.0697499	1218.16	671.985	1408.3	609.842	1271.61	630.485	1941.79	854.795	1762.09	1055.07
sp|Q9Y639|NPTN_HUMAN	Q9Y639	Q9Y639	NPTN	Neuroplastin	11	M			CS				7.9505e+07	20	3.97525e+06	0.530361	2.10831e+06	0.0541677	0.0646009	0.0487199	0.0513411	0.0588985	0.0470923	1386.93	1862.11	1128.78	1341.15	1153.61	1320.05	1728.96	1880.27	1622.56	1525.01
sp|Q6GTX8|LAIR1_HUMAN	Q6GTX8	Q6GTX8	LAIR1	Leukocyte-associated immunoglobulin-like receptor 1	4	M	PM						4.35981e+07	10	4.35981e+06	0.474418	2.06837e+06	0.0531415	0.0898149	0.0439774	0.0362709	0.0485501	0.0462088	651.949	673.398	471.625	314.889	353.382	242.572	409.775	403.145	354.697	389.227
sp|O14672|ADA10_HUMAN	O14672	O14672	ADAM10	Disintegrin and metalloproteinase domain-containing protein 10	12	M	PM		CS		Nuc		1.51916e+08	40	3.79789e+06	0.543729	2.06502e+06	0.0530554	0.0894534	0.0460391	0.0366105	0.0495248	0.0431587	3022.27	5191.99	2728.3	2551.93	2396.22	1895.4	2897.44	3183.52	2077.66	2814.23
sp|P02750|A2GL_HUMAN	P02750	P02750	LRG1	Leucine-rich alpha-2-glycoprotein	11	M				XC			6.92279e+07	17	4.07223e+06	0.496437	2.02161e+06	0.0519399	0.0867619	0.04421	0.074418	0.0283141	0.0329589	1626.36	2268.09	1114.01	1103.72	2646.22	1735.28	1056.24	819.753	550.94	967.965
sp|P08962|CD63_HUMAN	P08962	P08962	CD63	CD63 antigen	4	M	PM		CS	XC			2.78772e+07	7	3.98245e+06	0.49828	1.98438e+06	0.0509834	0.0785	0.0270718	0.0417847	0.0602935	0.0449422	2058.33	1933.54	633.071	636.802	656.248	918.032	2020.73	1644.75	1052.4	1243.63
sp|P05164-3|PERM_HUMAN	P05164-3	P05164	MPO	Isoform H7 of Myeloperoxidase	18					XC	Nuc		1.76791e+08	46	3.84329e+06	0.509136	1.95676e+06	0.0502738	0.0668199	0.0273185	0.0445328	0.0571884	0.0528009	3785.75	3209.82	1347.98	1253.25	1392.61	1908.15	3212.94	3042.5	2083.83	2849.52
sp|P48509|CD151_HUMAN	P48509	P48509	CD151	CD151 antigen	4	M	PM						3.24571e+07	10	3.24571e+06	0.595287	1.93213e+06	0.0496411	0.078442	0.0811057	0.0279264	0.019862	0.0438553	680.066	1855.33	945.875	1832.01	1436.57	589.177	420.595	520.288	570.32	1165.33
sp|Q9NPY3|C1QR1_HUMAN	Q9NPY3	Q9NPY3	CD93	Complement component C1q receptor	13	M	PM		CS				5.71666e+07	23	2.4855e+06	0.774512	1.92505e+06	0.0494592	0.0411319	0.0539707	0.0552297	0.030158	0.0674822	670.749	2610.47	655.806	3271.17	607.066	3126.6	577.927	2119.78	2129.02	4811.55
sp|P21333|FLNA_HUMAN	P21333	P21333	FLNA	Filamin-A	39	M	PM			XC	Nuc		4.80302e+08	129	3.72327e+06	0.507631	1.89005e+06	0.0485599	0.0335778	0.0492233	0.0691021	0.0471693	0.0463925	5386.08	4313.82	5579.25	6039.29	7709.48	7918.81	5644.44	6711.46	6407.72	6695.96
sp|Q07954|LRP1_HUMAN	Q07954	Q07954	LRP1	Prolow-density lipoprotein receptor-related protein 1	94	M	PM						5.80821e+08	222	2.61631e+06	0.716666	1.87502e+06	0.0481738	0.0419068	0.0642217	0.0429399	0.0409861	0.0513515	9183.35	20730.6	12429.4	30340	7558.1	18947.4	7849.2	22455	10822.1	28538.9
sp|P04899|GNAI2_HUMAN	P04899	P04899	GNAI2	Guanine nucleotide-binding protein G(i) subunit alpha-2	8	M	PM			XC			6.12015e+07	17	3.60009e+06	0.514224	1.85125e+06	0.0475631	0.0448456	0.0457608	0.057945	0.0497037	0.0411607	1813.3	1680.19	1468.25	1637.33	1150.4	1936.48	1779.52	2062.41	2336.84	1732.51
sp|O15389|SIGL5_HUMAN	O15389	O15389	SIGLEC5	Sialic acid-binding Ig-like lectin 5	16	M						ShG	9.92439e+07	24	4.13516e+06	0.445433	1.84194e+06	0.0473238	0.0568274	0.0356087	0.0365709	0.0521771	0.0525762	2733.03	2046.42	1787.71	1224.61	1409.11	1174.71	2505.15	2080.96	2338.98	2127.06
sp|P60709|ACTB_HUMAN	P60709	P60709	ACTB	Actin, cytoplasmic 1	5	M	PM			XC			7.78349e+07	20	3.89175e+06	0.471569	1.83523e+06	0.0471514	0.0411359	0.0513382	0.0712753	0.0392566	0.037576	491.846	256.039	299.185	305.162	394.529	395.715	232.369	270.611	252.05	262.755
sp|Q8WWI5|CTL1_HUMAN	Q8WWI5	Q8WWI5	SLC44A1	Choline transporter-like protein 1	4	M	PM						9.67472e+07	30	3.22491e+06	0.551357	1.77807e+06	0.045683	0.0570313	0.0425757	0.0401982	0.0475553	0.0407322	678.875	986.932	598.498	703.623	622.082	620.496	805.819	911.423	561.25	791.893
sp|O15031|PLXB2_HUMAN	O15031	O15031	PLXNB2	Plexin-B2	38	M	PM		CS				2.77619e+08	86	3.22812e+06	0.532834	1.72006e+06	0.0441923	0.0699435	0.0642527	0.0417313	0.0204041	0.029623	5809.63	8328.6	6696.63	7306.7	5036.19	4432.46	2556.98	2690.86	3328.79	3962.86
sp|Q9NPR2|SEM4B_HUMAN	Q9NPR2	Q9NPR2	SEMA4B	Semaphorin-4B	9	M	PM			XC			9.40828e+07	33	2.85099e+06	0.597752	1.70419e+06	0.0437847	0.046478	0.0628818	0.0342473	0.0265387	0.0497271	976.203	1917.14	2091.11	2477.05	936.104	1260.06	880.172	1212.36	1287.9	2304.38
sp|Q9NPH3|IL1AP_HUMAN	Q9NPH3	Q9NPH3	IL1RAP	Interleukin-1 receptor accessory protein	19	M	PM			XC			7.56724e+07	30	2.52241e+06	0.65634	1.65556e+06	0.0425353	0.038897	0.0340052	0.0422031	0.0534701	0.042509	2011.15	3258.13	1812.87	2720.21	1413.91	3153.22	2037.25	4960.33	2197.88	4000.26
sp|Q9BS26|ERP44_HUMAN	Q9BS26	Q9BS26	ERP44	Endoplasmic reticulum resident protein 44	10	M			CS				5.14728e+07	18	2.8596e+06	0.578327	1.65379e+06	0.0424897	0.0627162	0.0237742	0.0228061	0.0325816	0.0657907	2553.51	3225.97	832.474	1167.86	967.053	1046.38	1787.81	1856.1	1951.13	3801.9
sp|Q92542|NICA_HUMAN	Q92542	Q92542	NCSTN	Nicastrin	12	M	PM						1.02404e+08	28	3.65728e+06	0.44912	1.64256e+06	0.0422012	0.0386451	0.0239025	0.0469854	0.0521277	0.0473374	2587.26	2167.61	1829.52	1280.37	2175.32	2350.76	3659.37	3238.2	4491.87	2982.95
sp|O60486|PLXC1_HUMAN	O60486	O60486	PLXNC1	Plexin-C1	27	M	PM						2.5592e+08	77	3.32363e+06	0.478629	1.59079e+06	0.0408711	0.0564691	0.0513615	0.0395247	0.0297095	0.0301419	7673.08	8675.99	9133.75	7536.18	5927.65	5416.71	6416.67	5055.35	5583.42	5202.77
sp|P14618|KPYM_HUMAN	P14618	P14618	PKM	Pyruvate kinase PKM	14	M	PM			XC	Nuc		9.84922e+07	30	3.28307e+06	0.480718	1.57823e+06	0.0405486	0.0277978	0.0467988	0.0717276	0.039288	0.0230726	2895.4	1872.51	3134.16	3010.61	3556.2	4309.82	2757.57	2931.05	2639.42	1746.09
sp|O95976|IGSF6_HUMAN	O95976	O95976	IGSF6	Immunoglobulin superfamily member 6	3	M	PM						3.44838e+07	10	3.44838e+06	0.456198	1.57314e+06	0.0404178	0.0453994	0.0306126	0.0420855	0.042537	0.0409054	766.457	668.921	673.833	430.755	584.207	553.116	800.645	694.127	779.601	677.112
sp|P40197|GPV_HUMAN	P40197	P40197	GP5	Platelet glycoprotein V	9	M	PM						6.58778e+07	23	2.86425e+06	0.542285	1.55324e+06	0.0399065	0.0438375	0.0441179	0.0881922	0.0157573	0.0182968	1441.94	1625.1	1553.28	1561.9	2030.66	2916.23	572.554	646.937	742.205	762.015
sp|P13598|ICAM2_HUMAN	P13598	P13598	ICAM2	Intercellular adhesion molecule 2	5	M	PM						4.63626e+07	16	2.89766e+06	0.510463	1.47915e+06	0.0380029	0.0594911	0.0537838	0.0466387	0.0125028	0.023743	1024.68	1525.58	1323.9	1317.16	1549.3	1066.81	411.759	355.09	436.15	684.026
sp|Q9Y6M5|ZNT1_HUMAN	Q9Y6M5	Q9Y6M5	SLC30A1	Zinc transporter 1	10	M	PM						5.51997e+07	19	2.90525e+06	0.501446	1.45683e+06	0.0374293	0.0441394	0.0452561	0.0333644	0.0319508	0.0334316	2393.48	3053.68	3771.8	2990.05	2333.09	2058.91	2234.11	2448.08	2340.83	2598.42
sp|Q13291-4|SLAF1_HUMAN	Q13291-4	Q13291	SLAMF1	Isoform 4 of Signaling lymphocytic activation molecule	8	M	PM						7.51648e+07	15	5.01099e+06	0.287828	1.4423e+06	0.0370562	0.0106764	0.00241094	0.0178155	0.0841262	0.0588622	1263.88	174.399	198.08	37.6104	771.548	259.582	2716.7	1521.94	2655.13	1080.21
sp|P07996|TSP1_HUMAN	P07996	P07996	THBS1	Thrombospondin-1	25	M	PM		CS	XC			2.05107e+08	61	3.3624e+06	0.421088	1.41587e+06	0.036377	0.0167529	0.0173112	0.0549248	0.0199756	0.071494	2262.89	1539.72	1478.56	1519.43	7592.78	4502.74	2373.05	2033.28	9633	7382.01
sp|Q8NG11|TSN14_HUMAN	Q8NG11	Q8NG11	TSPAN14	Tetraspanin-14	2	M	PM		CS				30401296	12	2.53344e+06	0.555641	1.40768e+06	0.0361668	0.0701272	0.038909	0.0152411	0.0281582	0.0281163	637.402	1478.06	749.35	783.179	620.731	286.537	609.55	657.292	478.562	665.761
sp|Q9UMR7|CLC4A_HUMAN	Q9UMR7	Q9UMR7	CLEC4A	C-type lectin domain family 4 member A	6	M	PM						3.31684e+07	13	2.55142e+06	0.540524	1.3791e+06	0.0354324	0.0422751	0.0267254	0.0376475	0.032355	0.0380183	1247.85	1500.58	931.221	905.95	964.63	1191.98	1052.61	1271.93	1232.6	1516.08
sp|P01130|LDLR_HUMAN	P01130	P01130	LDLR	Low-density lipoprotein receptor	26	M	PM		CS				1.27936e+08	45	2.84302e+06	0.471678	1.34099e+06	0.0344532	0.0238948	0.0376627	0.0236639	0.0511097	0.0332693	2044.23	2022.18	3512.08	3043.92	2497.08	1786.32	4665.04	4790.35	3865.52	3163.12
sp|P09382|LEG1_HUMAN	P09382	P09382	LGALS1	Galectin-1	4				CS	XC	Nuc		24416412	9	2.71293e+06	0.490261	1.33005e+06	0.0341721	0.0292548	0.0357282	0.0461018	0.0346982	0.0272359	1416.21	1111.21	1334.9	1296.02	1214.43	1561.97	1462.86	1459.66	1424.54	1162.23
sp|P06396|GELS_HUMAN	P06396	P06396	GSN	Gelsolin	8	M	PM			XC			8.61799e+07	32	2.69312e+06	0.493403	1.3288e+06	0.0341399	0.0276349	0.0409332	0.0677481	0.0328795	0.00871419	3227.6	2583.14	3922.19	3654.01	4257.4	5648.65	2628.81	3403.78	2601.98	915.105
sp|Q15758|AAAT_HUMAN	Q15758	Q15758	SLC1A5	Neutral amino acid transporter B(0)	6	M	PM						3.81768e+07	16	2.38605e+06	0.556105	1.32689e+06	0.0340911	0.0301714	0.0237815	0.0384029	0.0376314	0.0394304	937.031	1168.46	784.8	879.553	1020.17	1326.6	1238.5	1614.04	1370.93	1715.55
sp|P13224-2|GP1BB_HUMAN	P13224-2	P13224	GP1BB	Isoform 2 of Platelet glycoprotein Ib beta chain	5	M	PM						3.72252e+07	17	2.18972e+06	0.590297	1.29258e+06	0.0332096	0.0468834	0.0379623	0.0480021	0.0139666	0.0242233	882.076	1399.9	429.628	1082.52	1228.31	1278.49	395.438	461.869	559.409	812.581
sp|Q4KMQ2-2|ANO6_HUMAN	Q4KMQ2-2	Q4KMQ2	ANO6	Isoform 2 of Anoctamin-6	15	M	PM		CS				1.04437e+08	42	2.48659e+06	0.517474	1.28674e+06	0.0330596	0.0391515	0.030921	0.0291538	0.035232	0.0304143	3014.28	3840.33	2978.97	2896.54	2663.37	2550.78	3645.94	3827.41	3052.05	3351.61
sp|P07204|TRBM_HUMAN	P07204	P07204	THBD	Thrombomodulin	5	M	PM		CS	XC			1.48906e+07	10	1.48906e+06	0.859522	1.27988e+06	0.0328833	0.0237357	0.0318984	0.0191206	0.0282848	0.0573232	120.069	786.686	136.172	1009.66	108.939	565.275	180.332	1038.25	359.002	2134.45
sp|P11166|GTR1_HUMAN	P11166	P11166	SLC2A1	Solute carrier family 2, facilitated glucose transporter member 1	4	M	PM				Nuc		2.36264e+07	13	1.81742e+06	0.699581	1.27143e+06	0.0326661	0.0268028	0.0163296	0.0375852	0.0362995	0.0442847	272.936	496.741	109.748	289.022	155.097	621.333	252.04	745.073	530.336	922.058
sp|Q14246|AGRE1_HUMAN	Q14246	Q14246	ADGRE1	Adhesion G protein-coupled receptor E1	4	M	PM						69061426	22	3.13916e+06	0.398931	1.25231e+06	0.0321748	0.0264159	0.0423682	0.032586	0.0357177	0.0248167	1228.36	827.091	1700.95	1266.88	1144.76	910.078	2168.44	1238.57	1465.08	872.946
sp|P78536|ADA17_HUMAN	P78536	P78536	ADAM17	Disintegrin and metalloproteinase domain-containing protein 17	18	M	PM		CS				1.01226e+08	44	2.30058e+06	0.532184	1.22433e+06	0.0314561	0.0397362	0.0368281	0.0292691	0.023903	0.0287015	2808.24	4079.24	3568.95	3610.59	3010.01	2680.16	2576.09	2717.65	2451.19	3310.19
sp|P01589|IL2RA_HUMAN	P01589	P01589	IL2RA	Interleukin-2 receptor subunit alpha	2	M	PM						25102095	7	3.58601e+06	0.33817	1.21268e+06	0.0311568	0.0124782	0.00388972	0.010191	0.0478474	0.0711538	790.268	183.614	313.974	54.6607	561.934	133.761	1035.23	779.756	1854.8	1176.27
sp|P14384|CBPM_HUMAN	P14384	P14384	CPM	Carboxypeptidase M	10	M	PM		CS	XC			6.5967e+07	22	2.9985e+06	0.401766	1.2047e+06	0.0309515	0.0442628	0.0261895	0.0213037	0.0330665	0.0287263	5516.09	3362.6	2808	1900.06	1876.5	1443.6	4415.75	2782.09	3162.52	2451.72
sp|P07359|GP1BA_HUMAN	P07359	P07359	GP1BA	Platelet glycoprotein Ib alpha chain	4	M	PM		CS				5.87076e+07	23	2.55251e+06	0.469077	1.19732e+06	0.0307621	0.0290616	0.0202678	0.059052	0.0228614	0.0265238	629.042	460.65	423.691	306.804	776.016	834.919	445.312	401.33	528.418	472.325
sp|Q9H7F0|AT133_HUMAN	Q9H7F0	Q9H7F0	ATP13A3	Probable cation-transporting ATPase 13A3	15	M	PM						9.78008e+07	49	1.99593e+06	0.594376	1.18634e+06	0.0304798	0.0192155	0.0236203	0.0356977	0.0350016	0.0377369	990.618	1547.6	1268.3	1816.75	1560.22	2564.51	1856.49	3122.07	2831.23	3414.5
sp|Q5VTE0|EF1A3_HUMAN	Q5VTE0	Q5VTE0	EEF1A1P5	Putative elongation factor 1-alpha-like 3	12					XC	Nuc		4.72538e+07	19	2.48704e+06	0.466414	1.15999e+06	0.0298029	0.0194203	0.0278322	0.0409196	0.0346646	0.027101	2499.29	1646.16	2210.33	2253.03	3019.7	3093.89	3309.41	3254.23	3636.88	2580.81
sp|Q9Y666|S12A7_HUMAN	Q9Y666	Q9Y666	SLC12A7	Solute carrier family 12 member 7	17	M	PM						9.82941e+07	43	2.28591e+06	0.500193	1.1434e+06	0.0293766	0.0292417	0.0233372	0.0286033	0.0388533	0.0259023	2605.62	2478.58	2273	1889.1	1808.89	2162.59	3374.56	3647.34	2572.35	2466.57
sp|Q9Y5U5-2|TNR18_HUMAN	Q9Y5U5-2	Q9Y5U5	TNFRSF18	Isoform 2 of Tumor necrosis factor receptor superfamily member 18	2	M	PM			XC			1.76439e+07	8	2.20549e+06	0.517335	1.14098e+06	0.0293145	0.00466495	0.0107151	0.0280925	0.0570575	0.0406869	40.4846	69.2372	105.95	151.877	412.881	371.913	859.263	937.892	642.699	678.425
sp|P43652|AFAM_HUMAN	P43652	P43652	AFM	Afamin	20					XC			8.64539e+07	37	2.33659e+06	0.485343	1.13405e+06	0.0291364	0.0423093	0.0312391	0.0321677	0.0206102	0.0216221	3749.64	5820.36	3582.82	4104.09	7145.21	3947.22	4587.17	3140.11	2517.97	3341.69
sp|Q9C0K1|S39A8_HUMAN	Q9C0K1	Q9C0K1	SLC39A8	Zinc transporter ZIP8	2	M	PM						1.41787e+07	5	2.83574e+06	0.38858	1.10191e+06	0.0283108	0.0253429	0.0145187	0.0192431	0.0590894	0.0195342	309.842	198.962	252.533	108.855	141.96	134.756	609.232	513.774	462.313	172.292
sp|P29323|EPHB2_HUMAN	P29323	P29323	EPHB2	Ephrin type-B receptor 2	5	M	PM			XC			1.56199e+08	50	3.12398e+06	0.351693	1.09868e+06	0.0282278	0.0323104	0.0262683	0.0483959	0.031146	0.00736982	820.195	546.606	1576.1	424.394	886.549	730.297	526.34	583.556	660.895	140.07
sp|P06756|ITAV_HUMAN	P06756	P06756	ITGAV	Integrin alpha-V	19	M	PM		CS				1.19781e+08	58	2.0652e+06	0.531284	1.09721e+06	0.0281899	0.0252812	0.0178544	0.0230197	0.0340477	0.0378949	1889.93	2825.71	1465.66	1905.82	2576.84	2295.03	3716.29	4214.71	4466.76	4758.47
sp|P21462|FPR1_HUMAN	P21462	P21462	FPR1	fMet-Leu-Phe receptor	2	M	PM						2.75627e+07	13	2.12021e+06	0.497669	1.05516e+06	0.0271097	0.0427962	0.0292318	0.0325368	0.0188694	0.0151574	1886.23	2032.33	1458.34	1325.71	1365.35	1378.23	1000.78	992.415	887.874	808.666
sp|O60449-2|LY75_HUMAN	O60449-2	O60449	LY75	Isoform 2 of Lymphocyte antigen 75	20	M	PM						1.7284e+08	85	2.03341e+06	0.517028	1.05133e+06	0.0270111	0.0474896	0.061509	0.0150982	0.0071254	0.00851976	4861.28	6891.19	8190.47	8523.92	2827.62	1954.25	1518.03	1145.12	1195.03	1388.92
sp|P42081|CD86_HUMAN	P42081	P42081	CD86	T-lymphocyte activation antigen CD86	7	M	PM		CS				2.3048e+07	9	2.56089e+06	0.395514	1.01287e+06	0.026023	0.030032	0.025657	0.0292604	0.0183897	0.0277202	1366.09	1325.98	2093.76	1081.85	2479.62	1152.37	1298.43	899.241	1679.22	1375.01
sp|Q8IWA5-3|CTL2_HUMAN	Q8IWA5-3	Q8IWA5	SLC44A2	Isoform 3 of Choline transporter-like protein 2	10	M	PM						50252728	28	1.79474e+06	0.563915	1.01208e+06	0.0260028	0.0329936	0.0238507	0.0230523	0.0259821	0.0239725	1777.14	2573.85	1480.82	1776.89	1408.95	1604.08	1772.15	2244.79	1526.56	2100.98
sp|P60174|TPIS_HUMAN	P60174	P60174	TPI1	Triosephosphate isomerase	5					XC	Nuc		4.19414e+07	19	2.20744e+06	0.457539	1.00999e+06	0.0259491	0.020662	0.0314481	0.0449398	0.0253085	0.0115344	1598.77	1089.72	1806.56	1583.95	1890.92	2114.13	1484.43	1478.28	1458.71	683.43
sp|Q9UHW9|S12A6_HUMAN	Q9UHW9	Q9UHW9	SLC12A6	Solute carrier family 12 member 6	11	M	PM						8.20606e+07	48	1.7096e+06	0.57622	985103	0.0253097	0.0227526	0.0186657	0.0256013	0.0301382	0.0282419	1599.14	2045.89	1458.45	1602.88	1357	2053.39	2117.28	3001.34	1967.34	2852.99
sp|P62158|CALM_HUMAN	P62158	P62158	CALM1	Calmodulin	4	M	PM			XC	Nuc		1.91439e+07	9	2.1271e+06	0.451397	960165	0.0246689	0.0219886	0.0333975	0.0479993	0.0215818	0.00415468	1189.73	865.363	1385.42	1255.22	1481.77	1684.98	1074.07	940.669	860.555	183.693
sp|P23229|ITA6_HUMAN	P23229	P23229	ITGA6	Integrin alpha-6	17	M	PM		CS				9.99039e+07	59	1.69329e+06	0.551914	934549	0.0240108	0.0322889	0.0273434	0.0302216	0.0112583	0.0214498	2881.63	3853.53	1874.83	3116.47	2848.05	3217.23	1485.66	1488.07	2723.65	2875.96
sp|P13473-2|LAMP2_HUMAN	P13473-2	P13473	LAMP2	Isoform LAMP-2B of Lysosome-associated membrane glycoprotein 2	5	M	PM			XC			3.34077e+07	18	1.85599e+06	0.486903	903685	0.0232178	0.0269091	0.0125874	0.0202203	0.0234698	0.0311003	1208.79	911.144	366.519	407.032	574.098	610.708	1115.26	880.127	942.165	1183.06
sp|O95497|VNN1_HUMAN	O95497	O95497	VNN1	Pantetheinase	5	M	PM						3.44743e+07	21	1.64164e+06	0.546044	896404	0.0230308	0.00596213	0.00786543	0.0349738	0.0422681	0.0226686	172.09	179.493	179.858	226.138	678.825	939.176	1302.12	1409.31	594.163	766.7
sp|P56199|ITA1_HUMAN	P56199	P56199	ITGA1	Integrin alpha-1	18	M	PM		CS				9.29991e+07	54	1.72221e+06	0.519929	895425	0.0230056	0.0228632	0.0280325	0.0267389	0.0221214	0.0167668	2524.8	3143.2	3764.72	3680.47	2802.26	3278.97	3478.57	3368.19	2258.92	2589.65
sp|P25705|ATPA_HUMAN	P25705	P25705	ATP5A1	ATP synthase subunit alpha, mitochondrial	9	M	PM						6.10393e+07	31	1.96901e+06	0.45116	888338	0.0228235	0.0168774	0.0267727	0.0375396	0.020134	0.0157265	1702.49	1243.75	1833.04	1884.19	2493.67	2467.6	2140.23	1643.26	2220.52	1302.01
sp|P28907|CD38_HUMAN	P28907	P28907	CD38	ADP-ribosyl cyclase/cyclic ADP-ribose hydrolase 1	15	M	PM		CS		Nuc		78387851	20	3.91939e+06	0.224368	879386	0.0225935	0.0445318	0.0319716	0.0140322	0.0116297	0.0126998	5181.55	2037.96	5143.09	1397.32	3400.89	572.809	2756.26	589.443	1668.94	652.949
sp|Q9UM01|YLAT1_HUMAN	Q9UM01	Q9UM01	SLC7A7	Y+L amino acid transporter 1	5	M	PM						1.69385e+07	10	1.69385e+06	0.517499	876566	0.0225211	0.0242639	0.0190933	0.0234231	0.0223095	0.0233761	471.625	525.278	507.44	394.743	376.705	452.306	472.575	534.892	479.974	568.532
sp|P08631|HCK_HUMAN	P08631	P08631	HCK	Tyrosine-protein kinase HCK	6	M	PM				Nuc		4.47471e+07	26	1.72104e+06	0.506305	871373	0.0223877	0.0152178	0.0222931	0.0269779	0.0234506	0.0241577	706.769	673.402	986.747	942.104	972.804	1064.85	1074.72	1149.28	1164.27	1200.97
sp|P63104|1433Z_HUMAN	P63104	P63104	YWHAZ	14-3-3 protein zeta/delta	5	M				XC	Nuc		2.41436e+07	14	1.72454e+06	0.496761	856685	0.0220103	0.0174536	0.0220468	0.0303253	0.0229441	0.0185128	743.299	592.738	658.734	715.035	850.791	918.629	800.735	862.967	791.625	706.322
sp|P15151|PVR_HUMAN	P15151	P15151	PVR	Poliovirus receptor	5	M	PM		CS	XC			1.96574e+07	10	1.96574e+06	0.435418	855919	0.0219906	0.0086148	0.0144999	0.0192867	0.0370263	0.0275886	411.835	324.899	826.566	522.243	1011.05	648.813	1956.6	1546.54	1254.67	1168.93
sp|O75871|CEAM4_HUMAN	O75871	O75871	CEACAM4	Carcinoembryonic antigen-related cell adhesion molecule 4	2	M	PM						1.277e+07	7	1.82429e+06	0.465463	849138	0.0218164	0.0411788	0.0217473	0.0308922	0.00563057	0.0133907	332.195	315.717	206.818	159.234	237.482	211.267	60.2749	47.8107	138.645	115.34
sp|P18433|PTPRA_HUMAN	P18433	P18433	PTPRA	Receptor-type tyrosine-protein phosphatase alpha	9	M	PM						5.86071e+07	36	1.62797e+06	0.519118	845111	0.0217129	0.0161711	0.0185058	0.026719	0.0253578	0.0218043	1509.41	1623.8	2038.24	1774.62	1904.09	2393.17	2401.34	2820.03	2402.83	2459.75
sp|Q9Y5S1|TRPV2_HUMAN	Q9Y5S1	Q9Y5S1	TRPV2	Transient receptor potential cation channel subfamily V member 2	7	M	PM		CS				4.89554e+07	29	1.68812e+06	0.480004	810303	0.0208186	0.0211818	0.0178181	0.0188247	0.0215273	0.0239306	862.705	916.063	929.254	735.917	822.214	726.189	1069.85	1031.1	1268.87	1162.71
sp|P11142|HSP7C_HUMAN	P11142	P11142	HSPA8	Heat shock cognate 71 kDa protein	10	M	PM			XC	Nuc		6.50386e+07	33	1.97087e+06	0.410793	809619	0.020801	0.0171687	0.0247057	0.0396945	0.0199481	0.00655513	2708.68	2193.09	2865.91	3013.84	4825.66	4522.79	4220.04	2822.06	4732.2	940.708
sp|P02652|APOA2_HUMAN	P02652	P02652	APOA2	Apolipoprotein A-II	1					XC			7350234	5	1.47005e+06	0.540738	794910	0.0204231	0.0244561	0.0206081	0.0523615	0.00479887	0.00672067	227.215	302.646	215.972	243.551	499.713	577.988	73.6372	65.7711	73.4812	93.4363
sp|Q92854|SEM4D_HUMAN	Q92854	Q92854	SEMA4D	Semaphorin-4D	15	M	PM			XC			6.56131e+07	33	1.98828e+06	0.397987	791308	0.0203306	0.0209819	0.025955	0.0215959	0.0132402	0.0209549	2183.07	2169.66	7933.55	2563.14	2737.1	1991.94	1611.4	1516.32	1683	2434.37
sp|Q01151|CD83_HUMAN	Q01151	Q01151	CD83	CD83 antigen	8	M	PM						3.24861e+07	13	2.49893e+06	0.312989	782139	0.020095	0.0190287	0.0133683	0.023549	0.0245455	0.0196326	1605.18	657.845	1463.02	441.361	1366.12	726.179	2080.53	939.794	1228.43	762.513
sp|Q15743|OGR1_HUMAN	Q15743	Q15743	GPR68	Ovarian cancer G-protein coupled receptor 1	4	M	PM						1.05644e+07	11	960396	0.802084	770318	0.0197913	0.0140757	0.0164145	0.0361372	0.0135938	0.020881	118.896	683.434	331.409	761.132	309.875	1565.1	184.956	730.997	258.935	1139.03
sp|Q9UPY5|XCT_HUMAN	Q9UPY5	Q9UPY5	SLC7A11	Cystine/glutamate transporter	6	M	PM		CS				2.34147e+07	19	1.23235e+06	0.624142	769164	0.0197617	0.0233088	0.0108085	0.0206879	0.0201592	0.0230878	634.485	1010.44	283.525	447.466	357.416	799.955	495.036	967.858	849.194	1124.42
sp|P02790|HEMO_HUMAN	P02790	P02790	HPX	Hemopexin	9					XC			3.32939e+07	22	1.51336e+06	0.507862	768576	0.0197466	0.0378706	0.0237409	0.0254896	0.00604034	0.00917068	2151.57	3290.51	1929.08	1969.98	3099.52	1975.52	826.423	581.259	436.115	895.193
sp|Q96BD0|SO4A1_HUMAN	Q96BD0	Q96BD0	SLCO4A1	Solute carrier organic anion transporter family member 4A1	10	M	PM						3.03297e+07	20	1.51648e+06	0.506231	767692	0.0197239	0.025612	0.0145096	0.0153042	0.0250576	0.0171662	1908.24	1964.35	954.639	1062.76	969.776	1047	1955.04	2128.46	1704.9	1479.13
sp|P31785|IL2RG_HUMAN	P31785	P31785	IL2RG	Cytokine receptor common subunit gamma	4	M	PM						1.61351e+07	12	1.34459e+06	0.561126	754486	0.0193846	0.0153062	0.017301	0.020242	0.0242988	0.0192605	1756.44	1800.03	1996.67	1943.06	1320.45	2123.35	2282.73	3164.78	1697.57	2544.68
sp|Q00325|MPCP_HUMAN	Q00325	Q00325	SLC25A3	Phosphate carrier protein, mitochondrial	5	M	PM				Nuc		28611016	19	1.50584e+06	0.499795	752613	0.0193364	0.0167169	0.0130803	0.0191643	0.0212833	0.0252036	801.763	730.737	521.056	546.045	716.291	747.231	1097.51	1030.37	1159	1237.72
sp|O14786|NRP1_HUMAN	O14786	O14786	NRP1	Neuropilin-1	8	M	PM			XC			4.01985e+07	41	980450	0.761732	746840	0.0191881	0.0228429	0.026694	0.0298617	0.0050561	0.0150115	1161.79	4463.59	1488.12	4981.4	1376.54	5204.81	562.834	1094.2	1366.2	3295.42
sp|P13796|PLSL_HUMAN	P13796	P13796	LCP1	Plastin-2	8	M	PM			XC			55599842	38	1.46315e+06	0.509514	745497	0.0191536	0.0163251	0.0200231	0.0331538	0.018503	0.0104579	1676.41	1263.75	1698.35	1480.27	1449.9	2289.26	1248.82	1586.33	1174.45	909.498
sp|Q9UIB8-3|SLAF5_HUMAN	Q9UIB8-3	Q9UIB8	CD84	Isoform 3 of SLAM family member 5	5	M	PM						2.34786e+07	16	1.46741e+06	0.507199	744270	0.0191221	0.0239339	0.0193002	0.0296872	0.0117297	0.0135867	438.657	515.971	402.852	397.355	499.84	570.873	341.304	280.058	351.247	329.065
sp|Q9H813-2|TM206_HUMAN	Q9H813-2	Q9H813	TMEM206	Isoform 2 of Transmembrane protein 206	2	M			CS				2.62843e+07	17	1.54613e+06	0.479723	741716	0.0190565	0.0215497	0.0166793	0.0196899	0.0170861	0.0202975	391.393	347.146	377.226	256.598	296.82	282.925	338.182	304.832	286.999	367.34
sp|P0CG48|UBC_HUMAN	P0CG48	P0CG48	UBC	Polyubiquitin-C	17	M	PM			XC	Nuc		6.55704e+07	44	1.49024e+06	0.493412	735300	0.0188916	0.0117943	0.0152653	0.0234727	0.0248715	0.0187594	2621.9	1764.89	2822.29	2181.51	1986.14	3133.05	4097.87	4121.89	3210.17	3153.7
sp|P05771-2|KPCB_HUMAN	P05771-2	P05771	PRKCB	Isoform Beta-II of Protein kinase C beta type	5	M	PM				Nuc		5.11486e+07	34	1.50437e+06	0.487613	733551	0.0188467	0.0108268	0.0146611	0.0200142	0.0192769	0.0281922	778.525	865.293	739.108	1119.01	2070.48	1426.79	1548.68	1706.27	2900.5	2531.32
sp|P01042-2|KNG1_HUMAN	P01042-2	P01042	KNG1	Isoform LMW of Kininogen-1	9	M	PM			XC			3.91942e+07	26	1.50747e+06	0.484679	730639	0.0187719	0.029487	0.0209574	0.0229692	0.0087725	0.0139013	1110.12	1590.02	923.666	1079.24	2002.97	1104.78	856.729	523.895	571.564	842.139
sp|P25445|TNR6_HUMAN	P25445	P25445	FAS	Tumor necrosis factor receptor superfamily member 6	7	M	PM		CS		Nuc		3.26131e+07	19	1.71648e+06	0.402914	691592	0.0177687	0.0255082	0.0181069	0.0100242	0.0197026	0.0148343	1071.71	963.966	1201.83	653.478	710.996	337.902	1230.45	824.621	838.028	629.804
sp|P25105|PTAFR_HUMAN	P25105	P25105	PTAFR	Platelet-activating factor receptor	2	M	PM						1.05719e+07	8	1.32148e+06	0.520857	688305	0.0176842	0.0224037	0.0133088	0.0139574	0.0201369	0.0177437	836.078	858.26	829.527	486.905	412.745	476.938	644.398	854.358	441.859	763.657
sp|P40925-3|MDHC_HUMAN	P40925-3	P40925	MDH1	Isoform 3 of Malate dehydrogenase, cytoplasmic	6					XC			2.53373e+07	16	1.58358e+06	0.434234	687643	0.0176672	0.0164107	0.0229172	0.0320487	0.0162866	0.00426544	1802.14	1292.53	1980.34	1723.77	2097.74	2251.56	1599.46	1420.67	1726.6	377.427
sp|Q496F6|CLM2_HUMAN	Q496F6	Q496F6	CD300E	CMRF35-like molecule 2	4	M	PM						1.08517e+07	11	986518	0.67977	670606	0.0172295	0.0296581	0.0225437	0.0169333	0.00851144	0.0104786	220.273	642.156	272.348	466.152	126.038	327.036	107.389	204.102	166.345	254.89
sp|P13612|ITA4_HUMAN	P13612	P13612	ITGA4	Integrin alpha-4	7	M	PM		CS				5.80756e+07	45	1.29057e+06	0.507296	654700	0.0168208	0.033738	0.0228457	0.0125946	0.00677922	0.00989574	3601.86	4212.97	3183.42	2724.44	1189.53	1402.85	1073.14	937.555	1311.35	1388.26
sp|P17301|ITA2_HUMAN	P17301	P17301	ITGA2	Integrin alpha-2	9	M	PM		CS				5.25204e+07	45	1.16712e+06	0.556892	649960	0.016699	0.015603	0.0211588	0.0304312	0.00733353	0.0122132	896.851	1033.98	678.417	1339.06	1439.38	1798.79	530.069	538.225	926.463	909.257
sp|P30101|PDIA3_HUMAN	P30101	P30101	PDIA3	Protein disulfide-isomerase A3	14				CS		Nuc		3.44955e+07	27	1.27761e+06	0.50056	639521	0.0164308	0.0142659	0.0154912	0.0253601	0.0164984	0.0120004	2747.65	2479.24	2330.41	2571.05	3257.04	3931.24	3191.18	3175.49	2941.31	2342.99
sp|P12931-2|SRC_HUMAN	P12931-2	P12931	SRC	Isoform 2 of Proto-oncogene tyrosine-protein kinase Src	5	M	PM				Nuc		3.19568e+07	25	1.27827e+06	0.497257	635630	0.0163308	0.0132172	0.0146434	0.0208582	0.0158755	0.017391	493.42	533.566	620.423	564.542	736.27	751.075	712.865	709.78	821.641	788.728
sp|Q15762|CD226_HUMAN	Q15762	Q15762	CD226	CD226 antigen	2	M	PM		CS				15758777	14	1.12563e+06	0.554085	623694	0.0160242	0.0216677	0.0164574	0.0229895	0.00908756	0.0119405	522.482	729.761	314.543	529.338	624.764	690.644	324.354	338.971	419.357	451.8
sp|Q8IU68|TMC8_HUMAN	Q8IU68	Q8IU68	TMC8	Transmembrane channel-like protein 8	3	M				XC			3.45494e+07	29	1.19136e+06	0.511103	608908	0.0156443	0.0235908	0.0106984	0.014861	0.0162326	0.0128173	526.382	631.027	349.816	273.294	354.484	354.579	480.118	480.884	321.837	385.176
sp|P27797|CALR_HUMAN	P27797	P27797	CALR	Calreticulin	5	M	PM		CS	XC	Nuc		2.41915e+07	19	1.27324e+06	0.465671	592911	0.0152333	0.013334	0.0180776	0.023131	0.0164413	0.00704467	1431.35	1057.08	1235.1	1368.64	1551.4	1635.67	1566.29	1443.54	1252.35	627.422
sp|Q9H0X4|F234A_HUMAN	Q9H0X4	Q9H0X4	FAM234A	Protein FAM234A	7	M			CS				2.1446e+07	19	1.12873e+06	0.508221	573646	0.0147383	0.0149471	0.0161167	0.0177385	0.0124074	0.0132966	1147.47	1358.08	1457.72	1398.46	1359.47	1437.62	1337.41	1248.53	1277.91	1357.26
sp|P15529|MCP_HUMAN	P15529	P15529	CD46	Membrane cofactor protein	3	M	PM		CS				1.42363e+07	12	1.18636e+06	0.470217	557847	0.0143324	0.0149524	0.0194184	0.0133444	0.0131375	0.0114196	465.057	474.16	775.667	588.075	382.845	377.462	539.293	461.396	437.436	406.838
sp|P33527|MRP1_HUMAN	P33527	P33527	ABCC1	Multidrug resistance-associated protein 1	15	M	PM						8.48539e+07	73	1.16238e+06	0.475052	552192	0.0141871	0.0113679	0.0128263	0.0141794	0.0139204	0.0181224	2011.36	1797.84	2579.02	1937.2	2122.81	2000.25	2725.25	2438.19	3151.6	3219.88
sp|P31146|COR1A_HUMAN	P31146	P31146	CORO1A	Coronin-1A	2	M	PM						24066811	20	1.20334e+06	0.456849	549745	0.0141243	0.0122603	0.0170797	0.0242062	0.0126187	0.00675052	336.027	229.879	358.695	305.833	399.894	404.841	266.421	262.036	237.79	142.197
sp|P16050|LOX15_HUMAN	P16050	P16050	ALOX15	Arachidonate 15-lipoxygenase	8	M	PM						4.48011e+07	38	1.17898e+06	0.463389	546325	0.0140364	0.0144212	0.0198997	0.0254926	0.0120016	0.00161968	2991.23	2011.67	2827.66	2650.98	2894.53	3171.97	1566.85	1854.15	1233.37	253.829
sp|P04156|PRIO_HUMAN	P04156	P04156	PRNP	Major prion protein	4	M	PM		CS		Nuc		7.87411e+06	9	874901	0.612471	535852	0.0137673	0.0224974	0.0262623	0.00809056	0.00481913	0.00870335	379.932	818.682	552.785	912.684	321.319	262.615	179.881	194.222	175.761	355.814
sp|Q687X5|STEA4_HUMAN	Q687X5	Q687X5	STEAP4	Metalloreductase STEAP4	4	M	PM						2.48855e+07	23	1.08198e+06	0.488806	528879	0.0135882	0.0112853	0.014779	0.0219579	0.0127215	0.00883471	387.766	546.204	723.408	683.114	1004.66	947.964	813.434	681.911	563.262	480.385
sp|P02786|TFR1_HUMAN	P02786	P02786	TFRC	Transferrin receptor protein 1	13	M	PM		CS	XC			4.14969e+07	40	1.03742e+06	0.503387	522225	0.0134172	0.00756818	0.00364141	0.00929347	0.0225996	0.0211557	2423.56	1691.91	1260.05	777.43	1863.67	1853.2	4620.7	5595.44	4858.38	5313.35
sp|Q96DU3|SLAF6_HUMAN	Q96DU3	Q96DU3	SLAMF6	SLAM family member 6	1	M	PM						17559586	16	1.09747e+06	0.475032	521336	0.0133944	0.010557	0.00850748	0.026784	0.00909577	0.0136808	96.6433	81.8293	59.2123	62.976	193.825	185.184	96.9548	78.083	135.99	119.134
sp|P15153|RAC2_HUMAN	P15153	P15153	RAC2	Ras-related C3 botulinum toxin substrate 2	2	M	PM						7.46447e+06	7	1.06635e+06	0.484713	516875	0.0132798	0.0119008	0.0138489	0.00933211	0.0134568	0.0169832	406.136	455.971	483.64	506.734	580.342	318.932	492.169	571.015	784.364	731.028
sp|Q08708|CLM6_HUMAN	Q08708	Q08708	CD300C	CMRF35-like molecule 6	2	M	PM						3.58829e+06	4	897072	0.575277	516065	0.013259	0.00943495	0.00969868	0.0205885	0.0108621	0.0162326	234.697	270.356	173.058	265.408	440.095	526.234	259.604	344.712	316.912	522.564
sp|Q9Y4D7|PLXD1_HUMAN	Q9Y4D7	Q9Y4D7	PLXND1	Plexin-D1	22	M	PM						9.53657e+07	85	1.12195e+06	0.454983	510468	0.0131151	0.013759	0.0173225	0.0107847	0.0126023	0.0113214	3665.83	3171.66	4726.07	3813.42	2757.07	2217.5	4287.86	3217.33	2952.92	2931.93
sp|Q9H3S1|SEM4A_HUMAN	Q9H3S1	Q9H3S1	SEMA4A	Semaphorin-4A	8	M	PM			XC			4.77744e+07	27	1.76942e+06	0.286416	506790	0.0130207	0.0195437	0.0209726	0.0150009	0.00467761	0.00710714	1894.59	1009.74	3427.18	1034.81	1536.17	691.318	926.126	267.654	726.779	412.527
sp|P48960|CD97_HUMAN	P48960	P48960	CD97	CD97 antigen	7	M	PM			XC			3.34142e+07	31	1.07788e+06	0.469912	506507	0.0130134	0.0152142	0.0101602	0.0103984	0.0149902	0.0136072	2731.75	2609.09	2150.78	1663.97	1959.28	1590.61	3175.45	2847.04	2766.22	2621.58
sp|Q99572|P2RX7_HUMAN	Q99572	Q99572	P2RX7	P2X purinoceptor 7	8	M	PM						3.70459e+07	31	1.19503e+06	0.421262	503420	0.0129341	0.00229059	0.0138512	0.0180053	0.0162909	0.0142928	190.339	191.52	1641.44	1106.01	2318.79	1342.84	1893.72	1508.55	1500.06	1342.58
sp|P16109|LYAM3_HUMAN	P16109	P16109	SELP	P-selectin	6	M	PM			XC			2.53405e+07	29	873811	0.572634	500374	0.0128558	0.0199243	0.0174661	0.0114377	0.00574615	0.0107797	1388.25	2577.49	778.479	2157.82	1936.5	1319.81	949.76	823.263	1249.69	1566.67
sp|P01860|IGHG3_HUMAN	P01860	P01860	IGHG3	Ig gamma-3 chain C region	6	M	PM			XC			1.71608e+07	17	1.00946e+06	0.490674	495315	0.0127258	0.0175961	0.0114841	0.0112178	0.0119241	0.011434	1352.8	1409.87	921.891	878.751	1105.73	801.733	1173.95	1058.12	820.169	1029.24
sp|O00206|TLR4_HUMAN	O00206	O00206	TLR4	Toll-like receptor 4	5	M	PM		CS				3.8174e+07	37	1.03173e+06	0.479745	494967	0.0127169	0.014387	0.013074	0.0136541	0.012223	0.0106696	1000.95	953.225	903.811	827.257	810.203	806.95	1019.08	896.911	905.786	794.198
sp|P49279|NRAM1_HUMAN	P49279	P49279	SLC11A1	Natural resistance-associated macrophage protein 1	2	M	PM						8.10201e+06	9	900223	0.537602	483962	0.0124341	0.0133867	0.00543604	0.00948668	0.0180328	0.0143561	513.223	465.593	200.022	180.56	169.393	294.311	591.776	694.617	414.418	560.95
sp|Q10589|BST2_HUMAN	Q10589	Q10589	BST2	Bone marrow stromal antigen 2	5	M	PM		CS				2.17443e+07	10	2.17443e+06	0.221049	480656	0.0123492	0.0111098	0.0114295	0.0134479	0.0120394	0.0136674	1056.4	229.932	1288.01	225.905	495.389	248.261	920.84	275.96	812.814	317.787
sp|P07900-2|HS90A_HUMAN	P07900-2	P07900	HSP90AA1	Isoform 2 of Heat shock protein HSP 90-alpha	11	M	PM			XC	Nuc		4.48259e+07	42	1.06728e+06	0.437619	467064	0.012	0.00876914	0.0140617	0.0215096	0.011947	0.00562518	2173.66	1596.08	2541.03	2444.21	3272.96	3492.11	2930.52	2408.26	3334.66	1150.24
sp|P15813|CD1D_HUMAN	P15813	P15813	CD1D	Antigen-presenting glycoprotein CD1d	3	M	PM		CS				1.04882e+07	10	1.04882e+06	0.44062	462133	0.0118733	0.0137955	0.00770867	0.0133165	0.00885046	0.0155366	569.86	418.501	302.355	223.328	455.885	360.335	370.171	297.353	623.727	529.503
sp|P04921|GLPC_HUMAN	P04921	P04921	GYPC	Glycophorin-C	1	M	PM						1.89151e+06	2	945753	0.488261	461774	0.0118641	0.0129594	0.0098466	0.0101173	0.0147284	0.0111673	159.456	172.336	175.901	125.049	115.659	120.009	195.453	216.918	193.204	166.837
sp|P25025|CXCR2_HUMAN	P25025	P25025	CXCR2	C-X-C chemokine receptor type 2	4	M	PM		CS				1.1895e+07	14	849642	0.542785	461172	0.0118486	0.0245203	0.00940578	0.00824324	0.00658444	0.010698	515.754	957.334	386.944	350.701	455.773	287.074	290.955	284.711	329.307	469.239
sp|P08887|IL6RA_HUMAN	P08887	P08887	IL6R	Interleukin-6 receptor subunit alpha	2	M	PM		CS	XC			1.46705e+07	17	862973	0.531859	458980	0.0117923	0.0151459	0.00961225	0.0108732	0.00741967	0.0157007	368.141	582.232	347.813	352.883	386.601	372.835	392.04	315.888	531.542	678.069
sp|Q9H3T3|SEM6B_HUMAN	Q9H3T3	Q9H3T3	SEMA6B	Semaphorin-6B	9	M	PM						2.26153e+07	32	706727	0.645085	455898	0.0117131	0.0174342	0.0199918	0.00671258	0.00494748	0.0102232	801.275	2466.51	1527.94	2701.08	915.099	847.086	611.456	775.196	773.895	1624.88
sp|Q7Z6M3|MILR1_HUMAN	Q7Z6M3	Q7Z6M3	MILR1	Allergin-1	6	M	PM						1.53316e+07	19	806924	0.554189	447189	0.0114893	0.0178129	0.0283112	0.00524445	0.00258306	0.00529921	840.487	1695.06	2122.38	2572.84	902.298	445.152	258.97	272.228	341.952	566.522
sp|Q9NQ25|SLAF7_HUMAN	Q9NQ25	Q9NQ25	SLAMF7	SLAM family member 7	6	M	PM						3.21464e+07	14	2.29617e+06	0.193102	443396	0.0113919	0.010096	0.00409682	0.00733433	0.0232801	0.0102488	1152.33	244.257	1259.21	94.6564	839.056	158.277	1562.09	623.779	1035.4	278.566
sp|Q99571-2|P2RX4_HUMAN	Q99571-2	Q99571	P2RX4	Isoform 2 of P2X purinoceptor 4	3	M	PM						1.66443e+07	18	924685	0.474957	439186	0.0112837	0.0137678	0.0140893	0.00920962	0.00841776	0.0111599	951.141	871.785	1085.09	852.001	525.416	520.17	852.88	590.323	596.241	793.888
sp|Q14162|SREC_HUMAN	Q14162	Q14162	SCARF1	Scavenger receptor class F member 1	4	M	PM						2.72346e+07	33	825291	0.532088	439128	0.0112822	0.00746574	0.00749046	0.00898117	0.0136467	0.0173987	447	515.834	527.614	494.254	917.554	553.513	610.082	1044.27	978.726	1350.55
sp|Q01518|CAP1_HUMAN	Q01518	Q01518	CAP1	Adenylyl cyclase-associated protein 1	8	M	PM						2.44965e+07	28	874877	0.498925	436497	0.0112147	0.00973346	0.0120529	0.0197777	0.0112565	0.00498051	2513.12	1824.27	2346.06	2157.33	2289.73	3306.41	1740.67	2336.54	1829.67	1048.7
sp|Q0VD83-4|APOBR_HUMAN	Q0VD83-4	Q0VD83	APOBR	Isoform 4 of Apolipoprotein B receptor	1	M	PM						40270908	49	821855	0.530273	435808	0.011197	0.00469748	0.00917159	0.0160068	0.0110063	0.015073	101.135	82.0796	169.383	153.045	194.644	249.478	150.308	212.99	264.574	295.886
sp|P13747|HLAE_HUMAN	P13747	P13747	HLA-E	HLA class I histocompatibility antigen, alpha chain E	6	M	PM		CS				2.04036e+07	17	1.20021e+06	0.361884	434338	0.0111592	0.0143702	0.00856175	0.0141109	0.00804504	0.0112354	1402.65	865.55	1197.42	492.489	1224.81	758.124	1036.55	536.666	1156.96	760.276
sp|Q13443|ADAM9_HUMAN	Q13443	Q13443	ADAM9	Disintegrin and metalloproteinase domain-containing protein 9	6	M	PM		CS	XC			3.23494e+07	41	789010	0.546864	431481	0.0110858	0.012592	0.0110079	0.0115671	0.0093186	0.0111712	1219.02	1289.4	1053.35	1076.48	707.486	1056.51	955.628	1056.8	840.885	1285.14
sp|P68371|TBB4B_HUMAN	P68371	P68371	TUBB4B	Tubulin beta-4B chain	4					XC	Nuc		1.69729e+07	19	893313	0.4756	424859	0.0109157	0.00737863	0.0112307	0.0157243	0.0108569	0.0100362	600.431	424.617	611.799	617.211	830.089	807.147	689.297	691.949	785.46	648.853
sp|Q5JXA9|SIRB2_HUMAN	Q5JXA9	Q5JXA9	SIRPB2	Signal-regulatory protein beta-2	6	M						ShG	1.22848e+07	16	767799	0.548303	420987	0.0108162	0.0164162	0.0181145	0.00948366	0.00581291	0.0056177	1119.04	1434.41	1286.99	1511.58	643.716	739.155	535.636	562.526	368.185	551.461
sp|P06127|CD5_HUMAN	P06127	P06127	CD5	T-cell surface glycoprotein CD5	3	M	PM						1.69141e+07	24	704756	0.595911	419972	0.0107901	0.0103212	0.0130121	0.0204971	0.00489199	0.00742593	897.027	1280.42	1570.57	1541.62	949.47	2268.16	453.989	672.135	738.226	1034.97
sp|P78325|ADAM8_HUMAN	P78325	P78325	ADAM8	Disintegrin and metalloproteinase domain-containing protein 8	6	M	PM		CS				2.96658e+07	32	927055	0.451729	418777	0.0107594	0.0101111	0.00866789	0.0107131	0.0111913	0.0127254	3962.11	2465.88	3078.98	2018.8	1942	2330.51	3870.94	3022.75	3318.17	3486.58
sp|Q9H015|S22A4_HUMAN	Q9H015	Q9H015	SLC22A4	Solute carrier family 22 member 4	4	M	PM						1.23199e+07	16	769991	0.541038	416595	0.0107033	0.0101693	0.0102566	0.0134363	0.0108403	0.00925352	1091.83	1235.47	1202.98	1190	996.017	1456.05	1375.95	1458.57	934.588	1262.99
sp|P07333|CSF1R_HUMAN	P07333	P07333	CSF1R	Macrophage colony-stimulating factor 1 receptor	3	M	PM		CS				18404263	31	593686	0.695052	412643	0.0106018	0.00880864	0.015445	0.0113425	0.00705043	0.0109937	192.126	567.608	428.943	950.459	284.651	651.938	292.827	503.157	323.456	795.863
sp|O60462|NRP2_HUMAN	O60462	O60462	NRP2	Neuropilin-2	9	M	PM			XC			4.61607e+07	49	942055	0.437357	412014	0.0105856	0.0122082	0.0157365	0.0116152	0.00323879	0.011188	640.795	1304.07	2727.92	1605.33	1287.59	1106.71	605.896	383.162	2124.55	1342.64
sp|O95977|S1PR4_HUMAN	O95977	O95977	S1PR4	Sphingosine 1-phosphate receptor 4	2	M	PM						13482380	17	793081	0.517961	410785	0.0105541	0.00939712	0.00966526	0.00810232	0.0107499	0.0140929	310.199	330.353	411.675	324.49	184.293	254.068	443.511	418.538	403.704	556.595
sp|O75144-2|ICOSL_HUMAN	O75144-2	O75144	ICOSLG	Isoform 2 of ICOS ligand	1	M	PM						7407422	11	673402	0.597917	402638	0.0103447	0.00827019	0.00888438	0.0156605	0.0110471	0.00851984	462.887	748.154	1016.49	767.552	533.018	1263.68	696.469	1106.81	486.787	865.889
sp|Q92896-2|GSLG1_HUMAN	Q92896-2	Q92896	GLG1	Isoform 2 of Golgi apparatus protein 1	15	M	PM			XC			4.23632e+07	63	672432	0.595387	400358	0.0102862	0.0122643	0.00732992	0.00703786	0.00926491	0.0146241	4638.29	6312.99	3224.31	3603.26	2749.75	3231.4	3816.66	5281.79	3842.46	8457.01
sp|P08238|HS90B_HUMAN	P08238	P08238	HSP90AB1	Heat shock protein HSP 90-beta	6	M	PM		CS				3.15371e+07	35	901061	0.440035	396499	0.010187	0.00732015	0.0118807	0.0157346	0.0104635	0.00662186	946.535	636.365	978.279	986.353	1240.48	1220.11	1224.67	1007.42	1332.65	646.727
sp|Q9UHX3|AGRE2_HUMAN	Q9UHX3	Q9UHX3	ADGRE2	Adhesion G protein-coupled receptor E2	5	M	PM						1.82253e+07	26	700975	0.565591	396465	0.0101861	0.00733308	0.0118062	0.00990027	0.00875292	0.0129884	322.469	372.204	342.146	572.279	404.89	448.229	368.814	492.034	578.135	740.636
sp|P12314|FCGR1_HUMAN	P12314	P12314	FCGR1A	High affinity immunoglobulin gamma Fc receptor I	4	M	PM						1.36015e+07	17	800090	0.486488	389234	0.0100004	0.0194478	0.00902247	0.00598552	0.00942368	0.00617848	541.2	651.917	378.611	288.837	289.513	178.971	334.69	349.857	252.81	232.68
sp|P51828|ADCY7_HUMAN	P51828	P51828	ADCY7	Adenylate cyclase type 7	6	M	PM						3.87031e+07	48	806314	0.481264	388049	0.00996992	0.00984115	0.010199	0.0117336	0.00914091	0.00930675	2415.64	2366.42	2882.57	2342.13	2539.3	2516.72	2605.29	2434.35	2678.92	2514.2
sp|Q96D31|CRCM1_HUMAN	Q96D31	Q96D31	ORAI1	Calcium release-activated calcium channel protein 1	1	M	PM						4350080	6	725013	0.527108	382161	0.00981862	0.0121401	0.00519864	0.0067777	0.0147919	0.00919126	373.893	315.961	164.924	129.213	52.8948	157.345	254.658	426.366	317.792	268.746
sp|P33241-3|LSP1_HUMAN	P33241-3	P33241	LSP1	Isoform 3 of Lymphocyte-specific protein 1	2	M	PM						1.00149e+07	14	715352	0.518282	370754	0.00952556	0.00819403	0.0112792	0.0168542	0.00931503	0.00360892	2169.19	1735.26	2396.06	2281.13	2233.51	3183.73	1351.89	2184.74	1370.17	858.619
sp|O14944|EREG_HUMAN	O14944	O14944	EREG	Proepiregulin	1	M	PM			XC			4.7664e+06	7	680914	0.53765	366094	0.00940582	0.0127204	0.00534017	0.00507535	0.0101924	0.0125743	111.252	262.263	43.0288	105.146	203.179	93.3379	210.867	232.734	278.491	291.254
sp|P29017|CD1C_HUMAN	P29017	P29017	CD1C	T-cell surface glycoprotein CD1c	2	M	PM						6.79138e+06	9	754598	0.470732	355214	0.00912629	0.00797952	0.00556547	0.0116172	0.00520362	0.0150633	333.584	228.601	243.881	152.267	200.259	296.865	191.806	165.103	523.214	484.813
sp|Q96AP7|ESAM_HUMAN	Q96AP7	Q96AP7	ESAM	Endothelial cell-selective adhesion molecule	4	M	PM						1.20948e+07	18	671936	0.520854	349980	0.00899183	0.0118966	0.00880172	0.0141087	0.00554712	0.00590112	1651.66	1553.29	757.316	1097.5	999.488	1643.14	864.317	802.131	1211.48	865.604
sp|P14770|GPIX_HUMAN	P14770	P14770	GP9	Platelet glycoprotein IX	3	M	PM						3.91807e+06	6	653012	0.533151	348154	0.00894491	0.0149663	0.00805113	0.010456	0.00583093	0.00621501	183.125	237.217	67.9537	121.869	172.671	147.828	103.826	102.357	102.837	110.67
sp|Q96LC7|SIG10_HUMAN	Q96LC7	Q96LC7	SIGLEC10	Sialic acid-binding Ig-like lectin 10	6	M	PM			XC			2.14042e+07	27	792749	0.438923	347956	0.00893982	0.0127629	0.00834409	0.00587444	0.00727791	0.0101153	2378.87	1637.05	1674.88	1022.11	770.508	672.104	1154.88	1033.87	1464.12	1457.63
sp|P26951|IL3RA_HUMAN	P26951	P26951	IL3RA	Interleukin-3 receptor subunit alpha	5	M	PM						1.27513e+07	20	637567	0.53785	342915	0.00881032	0.00362691	0.00334135	0.00839128	0.0179433	0.00940244	859.428	568.074	838.115	499.798	801.813	1172.34	1972.32	3112.55	1549.34	1654.48
sp|Q9UIQ6|LCAP_HUMAN	Q9UIQ6	Q9UIQ6	LNPEP	Leucyl-cystinyl aminopeptidase	7	M	PM			XC			3.50125e+07	51	686520	0.496898	341130	0.00876444	0.010308	0.00520995	0.00843738	0.00901778	0.0104219	1473.78	1180.34	813.126	569.732	682.906	861.784	1205.15	1143.61	984.862	1340.71
sp|P05026|AT1B1_HUMAN	P05026	P05026	ATP1B1	Sodium/potassium-transporting ATPase subunit beta-1	9	M	PM			XC			1.07546e+07	15	716976	0.463456	332287	0.00853725	0.00845674	0.008141	0.0107232	0.00873498	0.0070153	631.007	717.051	882.515	659.22	1036.6	811.014	793.711	820.27	911.665	668.264
sp|P07237|PDIA1_HUMAN	P07237	P07237	P4HB	Protein disulfide-isomerase	10	M	PM			XC			2.52389e+07	35	721112	0.460544	332104	0.00853255	0.007288	0.00796055	0.0110449	0.00946597	0.00721168	3654.27	2803.07	3351.24	2923.97	3993.02	3789.18	4811.25	4032.17	3710.11	3116.14
sp|Q04721|NOTC2_HUMAN	Q04721	Q04721	NOTCH2	Neurogenic locus notch homolog protein 2	17	M	PM		CS	XC	Nuc		5.02642e+07	74	679246	0.482786	327931	0.00842533	0.0127046	0.0158522	0.00531189	0.00357286	0.00555851	1657.47	2528.18	2670.1	3012.61	2239.9	942.877	1253.06	787.428	1300.36	1242.68
sp|P28906|CD34_HUMAN	P28906	P28906	CD34	Hematopoietic progenitor cell antigen CD34	3	M	PM						5.76272e+06	8	720339	0.451585	325295	0.0083576	0.00692881	0.00623555	0.00986178	0.00933546	0.00927501	1561.49	501.961	425.44	431.41	357.149	637.271	622.973	749.021	766.738	754.884
sp|P04920|B3A2_HUMAN	P04920	P04920	SLC4A2	Anion exchange protein 2	15	M	PM						2.93467e+07	47	624398	0.519397	324311	0.00833232	0.00483597	0.00670527	0.0110122	0.00959763	0.00945247	1117.79	1130.89	1555.5	1497.46	1764.46	2297.03	1946.09	2485.69	2771.52	2483.33
sp|P62879|GBB2_HUMAN	P62879	P62879	GNB2	Guanine nucleotide-binding protein G(I)/G(S)/G(T) subunit beta-2	3	M	PM			XC			8.63434e+06	13	664180	0.488002	324121	0.00832746	0.00870753	0.00833522	0.00960446	0.00856464	0.00673483	662.69	590.743	516.756	540.04	568.624	581.213	609.436	643.518	652.389	513.317
sp|Q92956|TNR14_HUMAN	Q92956	Q92956	TNFRSF14	Tumor necrosis factor receptor superfamily member 14	1	M	PM						6.05267e+06	9	672519	0.478326	321684	0.00826482	0.011868	0.00974106	0.00527054	0.00605002	0.00836341	156.982	316.836	293.094	248.352	349.335	125.507	211.82	178.88	210.715	250.838
sp|P09769|FGR_HUMAN	P09769	P09769	FGR	Tyrosine-protein kinase Fgr	3	M	PM						16509561	25	660382	0.47736	315240	0.00809927	0.00608232	0.00806514	0.00860346	0.00828113	0.00934402	400.752	357.295	490.301	452.454	489.717	450.806	568.074	538.76	696.3	616.661
sp|Q13162|PRDX4_HUMAN	Q13162	Q13162	PRDX4	Peroxiredoxin-4	2					XC	Nuc		1.0292e+07	15	686135	0.449488	308410	0.00792379	0.00400869	0.0111978	0.0127083	0.00478801	0.00791803	341.769	180.644	418.489	481.902	782.407	510.818	327.847	238.958	350.186	400.859
sp|Q92930|RAB8B_HUMAN	Q92930	Q92930	RAB8B	Ras-related protein Rab-8B	2	M	PM						7.32907e+06	12	610756	0.499859	305292	0.00784367	0.0073979	0.00562644	0.00883095	0.00817982	0.00900998	747.387	577.531	434.776	419.475	501.548	614.94	714.822	707.226	712.615	790.215
sp|P25090|FPR2_HUMAN	P25090	P25090	FPR2	N-formyl peptide receptor 2	2	M	PM						5.84928e+06	12	487440	0.624138	304230	0.0078164	0.0074321	0.00746655	0.0121993	0.005275	0.00748135	60.3142	88.4363	48.9477	84.8484	65.9346	129.483	54.2293	69.5166	54.9952	100.012
sp|Q658P3-2|STEA3_HUMAN	Q658P3-2	Q658P3	STEAP3	Isoform 2 of Metalloreductase STEAP3	4	M	PM						1.1923e+07	21	567761	0.534123	303255	0.00779134	0.00819214	0.00786241	0.00940297	0.00692847	0.00694521	573.437	624.272	622.242	572.186	479.452	639.146	518.774	584.739	435.801	594.589
sp|P14625|ENPL_HUMAN	P14625	P14625	HSP90B1	Endoplasmin	8	M	PM			XC	Nuc		2.50342e+07	40	625856	0.48256	302013	0.00775943	0.00556197	0.00827319	0.0112719	0.00711566	0.00712452	1386.79	1002.11	1254.98	1423.53	1955.24	1811.53	1531.2	1419.88	1484.08	1442.11
sp|P06576|ATPB_HUMAN	P06576	P06576	ATP5B	ATP synthase subunit beta, mitochondrial	3	M	PM		CS		Nuc		1.81763e+07	29	626770	0.479757	300697	0.00772564	0.00512109	0.00855792	0.012918	0.00635403	0.00656608	576.67	398.608	580.668	636.145	857.538	896.883	552.482	547.747	743.884	574.175
sp|O00241|SIRB1_HUMAN	O00241	O00241	SIRPB1	Signal-regulatory protein beta-1	4	M	PM						14191676	23	617029	0.486793	300366	0.00771712	0.0150486	0.00811465	0.00837684	0.00342697	0.00455885	1136.04	1149.21	621.117	591.807	689.005	570.617	304.926	289.843	403.892	391.125
sp|P07858|CATB_HUMAN	P07858	P07858	CTSB	Cathepsin B	2	M	PM			XC			9.57892e+06	16	598683	0.500282	299510	0.00769513	0.00821283	0.0077932	0.00920293	0.00615088	0.00747616	638.898	565.363	437.709	512.337	570.991	565.092	560.342	468.942	478.949	578.187
sp|Q9H5V8|CDCP1_HUMAN	Q9H5V8	Q9H5V8	CDCP1	CUB domain-containing protein 1	2	M	PM			XC			1.55334e+07	41	378863	0.787215	298247	0.00766268	0.00453394	0.00749428	0.0104866	0.00667738	0.00932001	70.7114	293.122	56.9161	462.709	126.119	604.734	137.535	478.109	288.687	676.931
sp|Q01650|LAT1_HUMAN	Q01650	Q01650	SLC7A5	Large neutral amino acids transporter small subunit 1	3	M	PM						1.06718e+07	16	666984	0.44523	296962	0.00762966	0.00646845	0.0050264	0.007575	0.00917872	0.00939252	280.067	164.448	148.523	122.037	193.201	171.779	321.639	258.439	283.871	268.266
sp|P00488|F13A_HUMAN	P00488	P00488	F13A1	Coagulation factor XIII A chain	3					XC			21749468	34	639690	0.4622	295665	0.00759634	0.0089454	0.00875094	0.0126043	0.00620948	0.0028051	1467.02	1392.02	1423.63	1300.48	1773.59	1749.53	1236.35	1070.16	1083.81	490.397
sp|Q12907|LMAN2_HUMAN	Q12907	Q12907	LMAN2	Vesicular integral-membrane protein VIP36	2	M	PM		CS	XC			9.3491e+06	17	549947	0.531694	292403	0.00751254	0.00586841	0.00227345	0.00635647	0.00946419	0.0124235	603.184	538.677	274.249	199.296	342.612	520.454	1071.33	962.143	792.901	1281.17
sp|P0CG05|LAC2_HUMAN	P0CG05	P0CG05	IGLC2	Ig lambda-2 chain C regions	2	M	PM			XC			4.19984e+06	7	599977	0.481955	289162	0.00742927	0.00778932	0.00778952	0.00848116	0.00710202	0.00628997	440.007	333.956	287.015	318.938	376.466	324.342	359.746	337.225	275.31	302.966
sp|Q9HAB3|S52A2_HUMAN	Q9HAB3	Q9HAB3	SLC52A2	Solute carrier family 52, riboflavin transporter, member 2	2	M	PM						4.13031e+06	7	590045	0.487976	287927	0.00739755	0.00927824	0.00640464	0.00855588	0.00586022	0.00716337	237.553	264.801	258.059	174.563	189.919	217.809	211.432	185.232	227.958	229.681
sp|Q96F46|I17RA_HUMAN	Q96F46	Q96F46	IL17RA	Interleukin-17 receptor A	4	M	PM			XC			1.14557e+07	23	498073	0.576036	286908	0.00737136	0.00618261	0.00767857	0.00786393	0.00739477	0.00775415	186.524	277.217	352.318	328.801	200.547	314.519	237.489	367.215	258.397	390.605
sp|Q9H7M9|VISTA_HUMAN	Q9H7M9	Q9H7M9	C10orf54	V-type immunoglobulin domain-containing suppressor of T-cell activation	6	M	PM						8462406	14	604458	0.464	280468	0.0072059	0.00895081	0.00970934	0.00491139	0.00513518	0.00738774	402.486	401.588	423.471	416.019	472.776	196.554	278.021	255.166	319.702	372.378
sp|P51681|CCR5_HUMAN	P51681	P51681	CCR5	C-C chemokine receptor type 5	4	M	PM		CS				7.30515e+06	11	664104	0.418455	277897	0.00713985	0.0137656	0.0145671	0.00604064	0.00200308	0.00086515	600.581	568.617	748.601	574.648	407.618	222.569	239.071	91.6366	85.4398	40.1486
sp|P11717|MPRI_HUMAN	P11717	P11717	IGF2R	Cation-independent mannose-6-phosphate receptor	24	M	PM		CS				5.68644e+07	120	473870	0.579105	274421	0.00705052	0.0083834	0.00588233	0.00596002	0.0060162	0.00874262	3461.58	4168.32	2033.27	2793.16	2445.94	2643.3	2674.03	3312.92	2323.19	4883.57
sp|Q9UBI6|GBG12_HUMAN	Q9UBI6	Q9UBI6	GNG12	Guanine nucleotide-binding protein G(I)/G(S)/G(O) subunit gamma-12	2	M	PM						2.34048e+06	4	585119	0.466309	272846	0.00701008	0.00340258	0.0111337	0.0114534	0.00336175	0.00678452	172.115	96.8119	238.49	302.529	416.191	290.678	173.099	105.933	159.277	216.867
sp|Q16581|C3AR_HUMAN	Q16581	Q16581	C3AR1	C3a anaphylatoxin chemotactic receptor	3	M	PM						6.34187e+06	12	528489	0.5161	272753	0.00700769	0.00633488	0.00746811	0.0053655	0.00906766	0.00648829	146.818	168.436	198.14	189.633	105.059	127.252	225.669	267.018	211.433	193.813
sp|O00421-2|CCRL2_HUMAN	O00421-2	O00421	CCRL2	Isoform 2 of C-C chemokine receptor-like 2	2	M	PM						6.21439e+06	13	478030	0.565896	270516	0.0069502	0.0100378	0.00891149	0.00491942	0.00554959	0.00552774	473.673	1118.4	869.503	948.227	408.627	488.911	622.936	684.803	641.734	691.925
sp|P04792|HSPB1_HUMAN	P04792	P04792	HSPB1	Heat shock protein beta-1	3	M	PM			XC	Nuc		6.83295e+06	12	569412	0.466599	265687	0.00682613	0.00485579	0.00777617	0.0105337	0.00640835	0.00524057	424.096	215.621	308.461	329.764	458.037	417.225	298.254	315.157	270.722	261.436
sp|P31947|1433S_HUMAN	P31947	P31947	SFN	14-3-3 protein sigma	2	M				XC	Nuc		8658152	16	541134	0.490344	265342	0.00681728	0.00482492	0.00683951	0.00992562	0.0069776	0.00594582	349.47	260.824	377.303	353.091	416.786	478.6	394.111	417.744	407.388	361.097
sp|P84095|RHOG_HUMAN	P84095	P84095	RHOG	Rho-related GTP-binding protein RhoG	5	M	PM						6.29909e+06	11	572645	0.463028	265151	0.00681236	0.00498759	0.00650499	0.00896103	0.007495	0.00631895	490.836	352.34	465.394	438.857	585.021	564.661	609.54	586.395	683.219	501.5
sp|P04233-2|HG2A_HUMAN	P04233-2	P04233	CD74	Isoform 2 of HLA class II histocompatibility antigen gamma chain	1	M	PM		CS				7.93928e+06	13	610714	0.432209	263956	0.00678167	0.00769793	0.00665147	0.0127037	0.00510424	0.00302847	193.227	139.851	121.392	115.402	271.41	205.864	118.713	102.7	117.141	61.8115
sp|O00299|CLIC1_HUMAN	O00299	O00299	CLIC1	Chloride intracellular channel protein 1	4	M	PM			XC	Nuc		7.86042e+06	15	524028	0.497527	260718	0.00669847	0.00550576	0.00705667	0.0107033	0.00572612	0.00523448	591.682	491.817	614.722	601.993	783.846	852.829	558.038	566.493	520.363	525.31
sp|P10909-2|CLUS_HUMAN	P10909-2	P10909	CLU	Isoform 2 of Clusterin	6	M			CS	XC	Nuc		1.08921e+07	22	495094	0.519044	256976	0.00660233	0.00705719	0.00441079	0.0120909	0.00360049	0.00666187	1397.59	1345.18	609.466	802.914	1557.08	2055.72	984.9	760.076	1372.49	1426.59
sp|Q9C0H2-4|TTYH3_HUMAN	Q9C0H2-4	Q9C0H2	TTYH3	Isoform 4 of Protein tweety homolog 3	3	M	PM						7.79234e+06	17	458373	0.558344	255930	0.00657545	0.00691983	0.00463105	0.00927217	0.00516323	0.00717286	290.284	367.457	167.913	234.852	303.045	439.188	315.974	303.654	325.296	427.915
sp|Q9NY35|CLDN1_HUMAN	Q9NY35	Q9NY35	CLDND1	Claudin domain-containing protein 1	2	M			CS				4.68605e+06	9	520672	0.489274	254751	0.00654517	0.0104877	0.00558398	0.00409946	0.00751758	0.00483619	416.081	493.791	291.186	251.08	244.794	172.167	390.682	392.003	290.718	255.812
sp|Q8N149|LIRA2_HUMAN	Q8N149	Q8N149	LILRA2	Leukocyte immunoglobulin-like receptor subfamily A member 2	3	M				XC			9.10322e+06	17	535484	0.463884	248402	0.00638205	0.0063837	0.00694248	0.00746234	0.00613357	0.00529139	636.231	409.929	622.688	425.75	445.966	427.434	431.027	436.211	269.193	381.734
sp|P13693|TCTP_HUMAN	P13693	P13693	TPT1	Translationally-controlled tumor protein	1					XC	Nuc		4.90396e+06	8	612995	0.403976	247635	0.00636235	0.00491534	0.00885196	0.0130389	0.00587004	0.000718396	368.715	291.147	457.354	500.729	646.063	688.901	647.219	385.077	704.048	47.8055
sp|P49019|HCAR3_HUMAN	P49019	P49019	HCAR3	Hydroxycarboxylic acid receptor 3	3	M	PM						7.97194e+06	17	468938	0.514837	241426	0.00620282	0.00658236	0.00601998	0.00232741	0.00628646	0.00901493	526.58	494.837	405.831	432.197	109.843	156.068	421.399	523.402	767.749	761.374
sp|P27701|CD82_HUMAN	P27701	P27701	CD82	CD82 antigen	2	M	PM						4.39227e+06	11	399297	0.57412	229245	0.00588985	0.00560338	0.00600028	0.00652409	0.00673028	0.00471888	96.9776	145.858	101.413	149.161	104.515	151.481	154.158	194.026	120.442	137.998
sp|Q9P0L0-2|VAPA_HUMAN	Q9P0L0-2	Q9P0L0	VAPA	Isoform 2 of Vesicle-associated membrane protein-associated protein A	1	M	PM						5.64116e+06	12	470097	0.481241	226230	0.00581239	0.00462669	0.00510362	0.00813858	0.00721371	0.00424193	390.136	306.247	381.334	322.615	409.484	480.516	451.644	528.819	473.346	315.442
sp|Q96TA1|NIBL1_HUMAN	Q96TA1	Q96TA1	FAM129B	Niban-like protein 1	5	M	PM				Nuc		1.32914e+07	32	415357	0.538157	223527	0.00574295	0.00520121	0.00846368	0.00624598	0.00466658	0.00457407	958.565	1074.56	1267.55	1669.9	1005.88	1151.03	887.621	1067.76	1050.93	1061.66
sp|P61626|LYSC_HUMAN	P61626	P61626	LYZ	Lysozyme C	3					XC			4.34008e+06	9	482231	0.461179	222395	0.00571386	0.00477577	0.00814594	0.00522407	0.00628469	0.00430762	219.724	154.041	143.712	250.923	272.67	150.301	295.382	224.504	161.932	156.094
sp|P05155-3|IC1_HUMAN	P05155-3	P05155	SERPING1	Isoform 3 of Plasma protease C1 inhibitor	4					XC			1.01822e+07	23	442703	0.5008	221706	0.00569615	0.00704132	0.00533081	0.00993137	0.00275823	0.00434296	600.268	655.222	492.039	473.732	762.878	824.331	504.376	284.258	323.403	454.021
sp|P31994|FCG2B_HUMAN	P31994	P31994	FCGR2B	Low affinity immunoglobulin gamma Fc region receptor II-b	2	M	PM						2.30731e+06	8	288413	0.762348	219871	0.00564902	0.00453903	0.0081235	0.00486339	0.00460619	0.00618537	67.7953	176.122	62.0381	301.022	71.057	168.325	34.9382	197.943	111.149	269.632
sp|P08581-2|MET_HUMAN	P08581-2	P08581	MET	Isoform 2 of Hepatocyte growth factor receptor	3	M	PM		CS	XC			2.17714e+07	63	345578	0.634896	219406	0.00563706	0.00510326	0.00751389	0.00587223	0.00458005	0.00537208	191.956	371.801	252.358	522.797	129.033	381.614	216.954	369.557	408.974	439.704
sp|O15438-4|MRP3_HUMAN	O15438-4	O15438	ABCC3	Isoform 4 of Canalicular multispecific organic anion transporter 2	4	M	PM						2.76626e+07	63	439089	0.497769	218565	0.00561546	0.00378867	0.00457319	0.00695879	0.00530698	0.00736503	660.841	637.156	921.161	734.485	914.232	1043.88	975.632	988.448	1366.61	1391.52
sp|A8MVS5|HIDE1_HUMAN	A8MVS5	A8MVS5	HIDE1	Protein HIDE1	3	M						ShG	3.15085e+06	6	525142	0.412674	216712	0.00556786	0.00663438	0.00586762	0.00499891	0.00518043	0.00519739	212.254	169.028	236.032	142.766	163.532	113.604	208.326	146.175	205.057	148.764
sp|P68871|HBB_HUMAN	P68871	P68871	HBB	Hemoglobin subunit beta	2					XC			5.83661e+06	11	530601	0.407793	216375	0.0055592	0.00511284	0.00715983	0.0112839	0.0028792	0.0026926	349.187	135.203	171.253	180.814	270.601	266.16	205.458	84.3226	87.5781	79.9929
sp|P19338|NUCL_HUMAN	P19338	P19338	NCL	Nucleolin	8	M			CS		Nuc		1.77125e+07	35	506071	0.423288	214214	0.00550366	0.0036181	0.00675797	0.00886411	0.004693	0.00424686	2149.12	1484.56	2605.58	2648.13	3929.79	3244.23	3383.15	2132.63	3555.98	1957.68
sp|O60602|TLR5_HUMAN	O60602	O60602	TLR5	Toll-like receptor 5	9	M	PM						1.73931e+07	41	424221	0.501627	212801	0.00546737	0.00673239	0.00643924	0.00483993	0.00466684	0.00480253	1341.42	1558.14	1617.1	1423.23	878.948	999.157	1371.75	1196.21	1174.53	1248.71
sp|Q13444|ADA15_HUMAN	Q13444	Q13444	ADAM15	Disintegrin and metalloproteinase domain-containing protein 15	4	M	PM		CS				1.31596e+07	33	398776	0.5206	207603	0.00533382	0.0074585	0.00850514	0.00515038	0.0027136	0.00347549	761.867	1080.81	948.39	1177.02	950.151	665.726	448.967	435.503	504.869	565.806
sp|P13639|EF2_HUMAN	P13639	P13639	EEF2	Elongation factor 2	8	M	PM				Nuc		2.02077e+07	45	449060	0.461648	207308	0.00532623	0.0032725	0.00656538	0.00701396	0.00455101	0.00552514	1253.46	908.12	1505.45	1739.91	2676.46	1736.14	1590.22	1398.68	1726.8	1722.51
sp|Q6UWL2-2|SUSD1_HUMAN	Q6UWL2-2	Q6UWL2	SUSD1	Isoform 2 of Sushi domain-containing protein 1	4	M						ShG	1.28762e+07	33	390189	0.527171	205696	0.00528484	0.00902716	0.00604919	0.00688467	0.00239541	0.00288219	575.736	803.579	383.005	514.257	653.631	546.662	239.226	236.16	291.044	288.24
sp|P51153|RAB13_HUMAN	P51153	P51153	RAB13	Ras-related protein Rab-13	3	M	PM						4.76309e+06	12	396924	0.516437	204986	0.00526659	0.00382579	0.00493219	0.00707741	0.00562809	0.00503921	229.502	218.836	259.076	269.428	289.514	361.103	352.301	356.539	301.968	323.829
sp|P23469|PTPRE_HUMAN	P23469	P23469	PTPRE	Receptor-type tyrosine-protein phosphatase epsilon	5	M	PM				Nuc		1.18567e+07	34	348727	0.584621	203873	0.00523799	0.00438579	0.00387834	0.00679129	0.00577954	0.00538518	688.265	877.684	637.519	741.209	705.113	1212.27	848.527	1280.95	902.502	1210.72
sp|Q15286|RAB35_HUMAN	Q15286	Q15286	RAB35	Ras-related protein Rab-35	1	M	PM						5.19112e+06	12	432593	0.469697	203188	0.00522038	0.00394801	0.00517867	0.0054269	0.00555043	0.00589906	547.087	454.512	590.848	569.366	624.391	557.286	732.744	707.689	950.533	762.967
sp|Q969P0|IGSF8_HUMAN	Q969P0	Q969P0	IGSF8	Immunoglobulin superfamily member 8	3	M	PM						1.04265e+07	24	434436	0.461551	200514	0.00515169	0.00317609	0.00355333	0.00728401	0.0059537	0.00578528	215.898	197.283	243.405	210.784	414.539	403.575	561.429	409.573	460.389	403.715
sp|Q9Y490|TLN1_HUMAN	Q9Y490	Q9Y490	TLN1	Talin-1	21	M	PM		CS	XC			5.28518e+07	133	397382	0.500618	198936	0.00511116	0.00315376	0.00496789	0.00710325	0.00467223	0.00582627	4275.33	3443.15	4904.48	5179.69	7129.18	6917.39	4741.61	5649.35	7215.17	7146.16
sp|P09211|GSTP1_HUMAN	P09211	P09211	GSTP1	Glutathione S-transferase P	1					XC	Nuc		4.19317e+06	10	419317	0.471646	197769	0.00508116	0.00514308	0.00506513	0.00992122	0.00500468	0.00127222	128.862	110.467	153.714	103.897	135.133	190.078	99.3118	119.051	103.806	30.699
sp|P53794|SC5A3_HUMAN	P53794	P53794	SLC5A3	Sodium/myo-inositol cotransporter	4	M	PM						7.22292e+06	22	328315	0.597348	196118	0.00503875	0.00690515	0.00634683	0.00481332	0.00426611	0.00320615	328.253	542.629	217.714	476.312	258.494	337.391	271.459	371.287	279.403	283.054
sp|P10809|CH60_HUMAN	P10809	P10809	HSPD1	60 kDa heat shock protein, mitochondrial	9	M	PM		CS	XC			1.48964e+07	33	451406	0.432341	195161	0.00501416	0.00355773	0.00547594	0.00801718	0.00458663	0.00395514	1628.62	1154.5	1621.99	1697.01	2507.48	2320.6	2425.81	1648.4	2664.56	1441.9
sp|Q9Y6M7-13|S4A7_HUMAN	Q9Y6M7-13	Q9Y6M7	SLC4A7	Isoform 13 of Sodium bicarbonate cotransporter 3	7	M	PM						1.77726e+07	55	323138	0.59781	193175	0.00496314	0.0026327	0.00363506	0.00550457	0.00536921	0.00733626	722.728	1152.18	987.029	1519.27	1312.14	2148.82	1631.29	2602.42	2767.29	3607.02
sp|P08865|RSSA_HUMAN	P08865	P08865	RPSA	40S ribosomal protein SA	3	M	PM				Nuc		6.03546e+06	13	464266	0.413763	192096	0.00493542	0.00370173	0.00528009	0.00821818	0.00440219	0.0036598	775.74	394.455	630.952	537.328	785.147	781.137	707.542	519.529	884.406	438.133
sp|P02679|FIBG_HUMAN	P02679	P02679	FGG	Fibrinogen gamma chain	5	M	PM		CS	XC			9.33975e+06	27	345916	0.547643	189439	0.00486713	0.00848395	0.00351767	0.00667427	0.00232077	0.0038703	1663.99	1840.15	564.203	728.644	898.298	1291.27	542.112	557.489	759.341	943.094
sp|O00391|QSOX1_HUMAN	O00391	O00391	QSOX1	Sulfhydryl oxidase 1	3	M				XC			14840289	45	329784	0.555602	183229	0.00470759	0.00645287	0.00338692	0.00428819	0.00418668	0.00512325	711.348	876.855	350.667	439.526	372.177	519.766	568.875	630.075	595.116	782.124
sp|P17181|INAR1_HUMAN	P17181	P17181	IFNAR1	Interferon alpha/beta receptor 1	3	M	PM						1.03701e+07	35	296288	0.599179	177530	0.00456117	0.00570917	0.00414113	0.00400768	0.00445667	0.00443886	419.171	782.669	472.157	542.162	339.462	490.069	470.011	676.649	423.244	683.647
sp|Q9NRA2|S17A5_HUMAN	Q9NRA2	Q9NRA2	SLC17A5	Sialin	2	M	PM						4.87658e+06	14	348327	0.49417	172133	0.0044225	0.00586095	0.00203005	0.00336313	0.0045846	0.00585715	496.274	378.809	136.013	125.304	127.305	193.89	390.5	328.172	335.632	425.298
sp|P51572-2|BAP31_HUMAN	P51572-2	P51572	BCAP31	Isoform 2 of B-cell receptor-associated protein 31	3	M	PM						6.07e+06	17	357059	0.475708	169856	0.00436401	0.00379898	0.00440485	0.00752215	0.00414257	0.00254306	498.371	384.223	416.988	425.455	528.219	678.605	530.056	464.017	496.517	288.954
sp|O15118|NPC1_HUMAN	O15118	O15118	NPC1	Niemann-Pick C1 protein	4	M	PM			XC			12885881	43	299672	0.566421	169740	0.00436103	0.00489858	0.00161968	0.00343746	0.00566281	0.00566285	749.639	759.292	214.634	239.758	246.34	475.263	732.738	972.116	684.168	986.117
sp|Q5ZPR3|CD276_HUMAN	Q5ZPR3	Q5ZPR3	CD276	CD276 antigen	2	M	PM						5.63899e+06	18	313277	0.541572	169662	0.00435903	0.00235313	0.00140142	0.00342858	0.00917012	0.00465458	139.237	141.288	92.6226	80.3584	131.725	183.625	459.908	609.792	301.508	313.974
sp|O95866|G6B_HUMAN	O95866	O95866	G6B	Protein G6b	3	M	PM						3.54104e+06	12	295086	0.570218	168264	0.00432309	0.00617485	0.00434088	0.00677193	0.00162828	0.00337198	719.724	899.945	315.182	604.188	664.673	880.359	274.681	262.825	437.199	552.114
sp|P60953|CDC42_HUMAN	P60953	P60953	CDC42	Cell division control protein 42 homolog	1	M	PM						2.76728e+06	9	307476	0.542599	166836	0.00428641	0.00421293	0.00396479	0.00304931	0.00324249	0.00663656	75.5033	82.1243	62.0941	73.8096	60.0973	53.0209	62.7761	70.0025	97.2042	145.34
sp|P08754|GNAI3_HUMAN	P08754	P08754	GNAI3	Guanine nucleotide-binding protein G(k) subunit alpha	2	M	PM						5.02181e+06	15	334787	0.484966	162360	0.00417143	0.0041386	0.0038031	0.00365859	0.00471895	0.00438118	353.631	315.17	248.115	276.588	331.238	248.521	391.063	398.001	389.079	374.832
sp|Q00839|HNRPU_HUMAN	Q00839	Q00839	HNRNPU	Heterogeneous nuclear ribonucleoprotein U	5	M			CS		Nuc		1.0221e+07	33	309729	0.523865	162256	0.00416875	0.00342586	0.0038586	0.00447901	0.00448981	0.00453081	954.125	962.554	923.506	1035.36	987.557	1122.53	1330.46	1397.11	1210.16	1430.17
sp|Q13201|MMRN1_HUMAN	Q13201	Q13201	MMRN1	Multimerin-1	8					XC			2.32508e+07	76	305932	0.522505	159851	0.00410695	0.00467406	0.00257031	0.00738555	0.00226867	0.00411749	2477.22	2130.26	1030.01	1118.74	1828.73	3002.48	1378.67	1145.14	1971.5	2108.27
sp|Q12999|TSN31_HUMAN	Q12999	Q12999	TSPAN31	Tetraspanin-31	2	M	PM						2.24986e+06	8	281232	0.56484	158851	0.00408126	0.00523614	0.00284448	0.00221233	0.00388177	0.00578518	400.358	537.349	197.026	278.774	295.842	202.513	355.273	441.187	390.024	666.986
sp|P15260|INGR1_HUMAN	P15260	P15260	IFNGR1	Interferon gamma receptor 1	2	M	PM						4053042	16	253315	0.624354	158158	0.00406347	0.006592	0.00515535	0.00206932	0.00252508	0.00398446	192.129	482.725	202.492	360.533	138.782	135.166	206.935	204.788	168.77	327.798
sp|P11362-21|FGFR1_HUMAN	P11362-21	P11362	FGFR1	Isoform 21 of Fibroblast growth factor receptor 1	3	M	PM			XC	Nuc		1.11504e+07	37	301362	0.516081	155527	0.00399587	0.0037412	0.00407613	0.00514847	0.00418987	0.00304797	184.351	207.205	241.458	215.597	118.023	254.347	196.911	257.003	313.024	189.651
sp|P40926|MDHM_HUMAN	P40926	P40926	MDH2	Malate dehydrogenase, mitochondrial	3	M	PM				Nuc		7.21521e+06	20	360761	0.421529	152071	0.00390707	0.00347592	0.00431005	0.00600309	0.00379649	0.00239312	493.833	362.312	487.37	429.042	610.647	558.144	704.754	438.271	541.36	280.241
sp|P26572|MGAT1_HUMAN	P26572	P26572	MGAT1	Alpha-1,3-mannosyl-glycoprotein 2-beta-N-acetylglucosaminyltransferase	4	M				XC			5.3211e+06	19	280058	0.53185	148949	0.00382685	0.00627159	0.00207593	0.0041309	0.00300896	0.00370402	886.941	872.812	284.066	275.906	359.608	512.798	498.963	463.775	350.929	579.124
sp|P42892|ECE1_HUMAN	P42892	P42892	ECE1	Endothelin-converting enzyme 1	7	M	PM						1.16985e+07	41	285329	0.505645	144275	0.00370677	0.00287033	0.00237262	0.00659537	0.00314109	0.00384959	766.878	633.383	494.329	499.998	995.696	1298.17	762.839	767.648	1041.07	954.34
sp|Q9Y2C9|TLR6_HUMAN	Q9Y2C9	Q9Y2C9	TLR6	Toll-like receptor 6	2	M	PM						9.36627e+06	33	283826	0.508113	144216	0.00370525	0.00448079	0.00292498	0.00269524	0.00410044	0.00409056	229.358	262.481	167.291	163.633	138.494	140.831	276.679	266.025	255.156	269.204
sp|P22061-2|PIMT_HUMAN	P22061-2	P22061	PCMT1	Isoform 2 of Protein-L-isoaspartate(D-aspartate) O-methyltransferase	3					XC			3.19754e+06	11	290686	0.48301	140404	0.00360732	0.00318796	0.0035848	0.00491188	0.00309321	0.00347076	317.938	222.824	229.571	239.287	340.957	306.235	238.449	239.445	243.488	272.538
sp|P61106|RAB14_HUMAN	P61106	P61106	RAB14	Ras-related protein Rab-14	3	M	PM						4.29323e+06	15	286215	0.486853	139345	0.0035801	0.00325942	0.0029128	0.00396498	0.00395997	0.00375273	443.796	345.696	282.339	295.032	350.991	375.105	475.772	465.151	479.37	447.152
sp|P48029|SC6A8_HUMAN	P48029	P48029	SLC6A8	Sodium- and chloride-dependent creatine transporter 1	4	M	PM						4.40621e+06	19	231906	0.599948	139132	0.00357462	0.00262036	0.00346371	0.00396307	0.00391956	0.00386985	362.74	471.931	435.789	595.752	285.367	636.661	490.187	781.814	605.834	783.011
sp|Q9BY67-3|CADM1_HUMAN	Q9BY67-3	Q9BY67	CADM1	Isoform 3 of Cell adhesion molecule 1	1	M	PM						5.85489e+06	20	292745	0.471799	138116	0.00354854	0.00399329	0.00340047	0.00665604	0.00431233	5.83294e-05	351.431	497.826	534.835	404.847	626.248	740.152	370.635	595.397	631.794	8.16937
sp|P10721|KIT_HUMAN	P10721	P10721	KIT	Mast/stem cell growth factor receptor Kit	2	M	PM			XC			8.7616e+06	47	186417	0.728685	135839	0.00349004	0.00368342	0.00534249	0.00352089	0.00177245	0.00341192	183.853	481.346	205.867	666.736	166.618	410.408	133.71	256.524	172.252	500.91
sp|P21589|5NTD_HUMAN	P21589	P21589	NT5E	5'-nucleotidase	3	M	PM		CS				5.14898e+06	27	190703	0.711227	135633	0.00348474	0.00189924	0.00117468	0.00355195	0.00389742	0.00639951	44.2624	118.203	39.6502	69.8189	74.362	197.186	98.3953	268.643	190.484	447.457
sp|P11413-2|G6PD_HUMAN	P11413-2	P11413	G6PD	Isoform Long of Glucose-6-phosphate 1-dehydrogenase	5	M	PM				Nuc		9.74342e+06	35	278384	0.477851	133026	0.00341776	0.00257853	0.00428347	0.00563468	0.0029763	0.00210388	983.482	702.154	1179.75	1113.94	1422.28	1368.63	795.545	897.603	782.999	643.63
sp|Q8TDU6|GPBAR_HUMAN	Q8TDU6	Q8TDU6	GPBAR1	G-protein coupled bile acid receptor 1	2	M	PM						2.25151e+06	9	250168	0.524472	131206	0.003371	0.00372531	0.00398298	0.00367794	0.0019014	0.00374045	192.694	243.032	191.152	248.149	316.314	214.024	139.978	137.379	172.376	274.144
sp|P01009|A1AT_HUMAN	P01009	P01009	SERPINA1	Alpha-1-antitrypsin	1	M				XC			5.69992e+06	23	247823	0.516601	128026	0.00328928	0.00394194	0.00215209	0.00382212	0.00268149	0.00385114	153.73	165.195	98.7302	86.1296	156.759	142.872	136.54	124.454	109.219	181.314
sp|O15144|ARPC2_HUMAN	O15144	O15144	ARPC2	Actin-related protein 2/3 complex subunit 2	1	M	PM						5.22712e+06	19	275112	0.464662	127834	0.00328436	0.00280464	0.00408047	0.006858	0.00307846	0.000400262	365.545	266.3	447.693	370.008	401.138	580.833	306.498	323.725	303.551	42.6967
sp|Q09666|AHNK_HUMAN	Q09666	Q09666	AHNAK	Neuroblast differentiation-associated protein AHNAK	29	M	PM				Nuc		9.92848e+07	377	263355	0.482843	127159	0.00326702	0.00312097	0.00416528	0.00515212	0.00300758	0.0013925	9604.97	7067.25	8501.18	9007.6	8307.93	10406.5	6951.72	7542.68	6870.42	3542.51
sp|P48047|ATPO_HUMAN	P48047	P48047	ATP5O	ATP synthase subunit O, mitochondrial	1	M	PM				Nuc		3365424	12	280452	0.445618	124974	0.00321089	0.00289221	0.00438066	0.00523723	0.00324766	0.000855073	239.578	152.357	205.06	220.383	201.336	246.089	217.251	189.475	205.324	50.6047
sp|P62993|GRB2_HUMAN	P62993	P62993	GRB2	Growth factor receptor-bound protein 2	3	M	PM				Nuc		3.77612e+06	14	269723	0.459026	123810	0.00318097	0.0024538	0.00346273	0.00524302	0.00319559	0.00193711	684.614	450.439	618.332	607.044	740.889	858.493	659.646	649.675	791.017	399.491
sp|P26012|ITB8_HUMAN	P26012	P26012	ITGB8	Integrin beta-8	4	M	PM		CS				1.06277e+07	41	259213	0.47038	121929	0.00313264	0.0029363	0.00156437	0.00163327	0.00381155	0.0051617	261.261	351.853	243.105	179.021	392.49	174.572	534.788	505.835	714.577	694.877
sp|P02675|FIBB_HUMAN	P02675	P02675	FGB	Fibrinogen beta chain	3	M	PM		CS	XC			6.12566e+06	29	211230	0.547674	115685	0.00297222	0.00484074	0.00209473	0.0046932	0.00129904	0.002338	988.18	1118.31	342.468	462.151	638.805	967.116	373.677	332.37	536.595	606.808
sp|P35579|MYH9_HUMAN	P35579	P35579	MYH9	Myosin-9	8	M	PM				Nuc		2.47277e+07	102	242429	0.473451	114778	0.00294892	0.00219226	0.00364863	0.00477795	0.00297059	0.00155411	3054.17	2021.65	3446.63	3213.28	3716.69	3930.2	2602.45	3033.93	2537.93	1610.09
sp|Q08ET2|SIG14_HUMAN	Q08ET2	Q08ET2	SIGLEC14	Sialic acid-binding Ig-like lectin 14	2	M	PM						5.3335e+06	21	253976	0.44951	114165	0.00293317	0.0020968	0.00138313	0.00201028	0.0038272	0.00484665	131.625	149.853	113.867	94.4012	294.756	128.151	387.585	302.927	375.769	389.139
sp|P17066|HSP76_HUMAN	P17066	P17066	HSPA6	Heat shock 70 kDa protein 6	1	M	PM						12477463	37	337229	0.337433	113792	0.00292359	0.00255175	0.00350856	0.00485251	0.00283449	0.00131364	440.444	317.924	475.741	417.463	1200.01	539.273	791.887	391.117	723.8	183.872
sp|A6NIZ1|RP1BL_HUMAN	A6NIZ1	A6NIZ1	RP1BL	Ras-related protein Rap-1b-like protein	2	M	PM						2.35013e+06	10	235013	0.479775	112753	0.00289691	0.00240863	0.00261942	0.00302849	0.00368488	0.00268613	92.9106	87.8431	90.005	91.2321	116.484	98.5195	126.122	148.836	156.2	110.058
sp|Q9UBR2|CATZ_HUMAN	Q9UBR2	Q9UBR2	CTSZ	Cathepsin Z	1	M	PM			XC			2.81859e+06	12	234882	0.478027	112280	0.00288475	0.00188552	0.00228422	0.00465482	0.00318826	0.00258006	160.223	121.69	294.133	140.788	146.045	267.968	241.125	227.889	190.794	187.071
sp|Q16842|SIA4B_HUMAN	Q16842	Q16842	ST3GAL2	CMP-N-acetylneuraminate-beta-galactosamide-alpha-2,3-sialyltransferase 2	1	M				XC			3.03943e+06	18	168857	0.663724	112075	0.00287946	0.00575386	0.00171858	0.00191568	0.00183887	0.0030988	78.1383	204.458	30.3748	58.32	45.6933	60.7192	59.3264	72.3673	49.7077	123.707
sp|P04040|CATA_HUMAN	P04040	P04040	CAT	Catalase	2	M	PM			XC			6.69781e+06	29	230959	0.484337	111862	0.002874	0.00239045	0.00238044	0.00307926	0.00323724	0.00320292	296.956	217.859	318.235	207.185	276.793	250.323	290.973	326.751	233.129	327.941
sp|P00736|C1R_HUMAN	P00736	P00736	C1R	Complement C1r subcomponent	3					XC			6.76379e+06	33	204963	0.537565	110181	0.00283082	0.00388453	0.00210351	0.00391078	0.00216154	0.00231348	1247.82	1393.76	620.929	720.773	1153.32	1251.61	919.615	858.933	495.103	932.544
sp|Q8IX19|MCEM1_HUMAN	Q8IX19	Q8IX19	MCEMP1	Mast cell-expressed membrane protein 1	2	M						ShG	2.06614e+06	10	206614	0.522819	108021	0.00277533	0.0022565	0.00216553	0.00414489	0.00267644	0.00276562	114.71	132.311	131.498	121.263	213.171	216.786	143.083	173.807	151.755	182.183
sp|P29466|CASP1_HUMAN	P29466	P29466	CASP1	Caspase-1	2					XC			3.79164e+06	19	199560	0.517828	103338	0.002655	0.00189422	0.00229082	0.00271986	0.00274346	0.00350304	358.213	417.641	461.426	482.357	597.467	534.905	541.644	669.913	809.088	867.706
sp|Q9NPR9|GP108_HUMAN	Q9NPR9	Q9NPR9	GPR108	Protein GPR108	2	M						ShG	4.21081e+06	23	183079	0.562076	102904	0.00264385	0.00245569	0.00118616	0.00247525	0.00285367	0.00397749	262.663	251.064	122.943	115.813	139.361	225.729	291.676	323.119	252.76	456.851
sp|Q8NHJ6-2|LIRB4_HUMAN	Q8NHJ6-2	Q8NHJ6	LILRB4	Isoform 2 of Leukocyte immunoglobulin-like receptor subfamily B member 4	3	M	PM						5.2213e+06	17	307135	0.329849	101308	0.00260285	0.00400689	0.00142684	0.00125717	0.00334002	0.00269451	268.517	201.311	213.192	68.4604	217.514	56.3396	363.374	185.848	286.539	152.088
sp|P17927|CR1_HUMAN	P17927	P17927	CR1	Complement receptor type 1	8	M	PM		CS				1.65219e+07	96	172103	0.586229	100892	0.00259215	0.00276272	0.00413645	0.00194912	0.00133062	0.00288174	583.601	903.075	740.511	1291.28	706.112	568.31	398.924	481.715	607.742	1058.27
sp|O00186|STXB3_HUMAN	O00186	O00186	STXBP3	Syntaxin-binding protein 3	2	M	PM						5.93066e+06	30	197689	0.499073	98661.2	0.00253484	0.00168485	0.00236022	0.00316668	0.00242243	0.00304902	195.947	204.553	265.47	273.654	349.876	342.931	323.413	325.719	433.825	415.872
sp|Q9BX67|JAM3_HUMAN	Q9BX67	Q9BX67	JAM3	Junctional adhesion molecule C	2	M	PM			XC			2.58869e+06	14	184907	0.528727	97765.2	0.00251182	0.00233725	0.00216827	0.00487499	0.00162195	0.00196021	101.212	102.106	52.865	90.4619	163.897	189.967	83.6017	78.4752	95.0903	96.2065
sp|P51575|P2RX1_HUMAN	P51575	P51575	P2RX1	P2X purinoceptor 1	4	M	PM						3.66191e+06	18	203439	0.468663	95344.5	0.00244963	0.00275314	0.00180972	0.00311953	0.00269949	0.00194523	379.267	344.865	302.34	216.49	431.55	348.554	336.046	374.5	317.325	273.746
sp|P20073|ANXA7_HUMAN	P20073	P20073	ANXA7	Annexin A7	3	M	PM				Nuc		3.49042e+06	19	183706	0.515738	94744.2	0.00243421	0.00197468	0.00210491	0.00285136	0.00249041	0.00273654	279.35	238.997	238.538	243.296	251.043	307.826	310.78	333.821	325.018	372.093
sp|Q7Z7N9|T179B_HUMAN	Q7Z7N9	Q7Z7N9	TMEM179B	Transmembrane protein 179B	1	M						ShG	1.00709e+06	7	143870	0.657672	94619.3	0.002431	0.00170489	0.00244082	0.00293486	0.00206414	0.00303058	54.621	93.9904	86.3393	128.508	69.6406	144.322	64.4515	126.03	79.1848	187.702
sp|Q9Y3Z3|SAMH1_HUMAN	Q9Y3Z3	Q9Y3Z3	SAMHD1	Deoxynucleoside triphosphate triphosphohydrolase SAMHD1	3	M	PM				Nuc		6.0285e+06	35	172243	0.539473	92920.3	0.00238735	0.00186485	0.0023731	0.00314266	0.00244801	0.00220503	282.085	266.417	334.024	323.772	294.743	400.473	230.575	387.327	337.023	353.906
sp|P30040|ERP29_HUMAN	P30040	P30040	ERP29	Endoplasmic reticulum resident protein 29	1	M			CS				2.84207e+06	14	203005	0.456411	92653.9	0.0023805	0.00244862	0.00242047	0.00323249	0.00266988	0.00132415	122.579	86.1601	82.8641	81.3373	100.011	101.456	101.467	104.046	99.6668	52.3453
sp|P21964|COMT_HUMAN	P21964	P21964	COMT	Catechol O-methyltransferase	1	M	PM						2.6296e+06	15	175307	0.520455	91239.3	0.00234416	0.0012616	0.00141631	0.00353838	0.00262097	0.00287542	100.152	84.4232	107.229	90.5117	137.463	211.205	194.245	194.245	194.855	216.171
sp|Q9ULQ1-3|TPC1_HUMAN	Q9ULQ1-3	Q9ULQ1	TPCN1	Isoform 3 of Two pore calcium channel protein 1	2	M	PM						4.50263e+06	26	173178	0.525779	91053.3	0.00233938	0.00244362	0.00128126	0.00229286	0.00285748	0.00267225	310.565	312.05	202.222	156.254	202.013	261.171	341.655	404.13	311.77	383.373
sp|P46940|IQGA1_HUMAN	P46940	P46940	IQGAP1	Ras GTPase-activating-like protein IQGAP1	9	M	PM						1.50781e+07	81	186150	0.482923	89896	0.00230965	0.0019169	0.00261906	0.00395398	0.00233751	0.00106319	1273.81	1045.17	1467.59	1363.76	1537.49	1923	1172.56	1411.53	1395.52	651.261
sp|O15162|PLS1_HUMAN	O15162	O15162	PLSCR1	Phospholipid scramblase 1	1	M	PM			XC	Nuc		1732534	9	192504	0.466935	89886.7	0.00230941	0.00201481	0.00237821	0.00424409	0.00243499	0.000853266	238.942	175.063	282.032	197.34	260.864	328.929	208.489	234.317	172.922	83.2912
sp|Q13873|BMPR2_HUMAN	Q13873	Q13873	BMPR2	Bone morphogenetic protein receptor type-2	2	M	PM		CS	XC			1.06596e+07	46	231730	0.38171	88453.5	0.00227258	0.00271141	0.00209825	0.00227097	0.00213296	0.00216908	1283.93	764.245	1339.71	564.806	767.591	570.962	984.631	665.837	892.853	686.857
sp|P43003|EAA1_HUMAN	P43003	P43003	SLC1A3	Excitatory amino acid transporter 1	2	M	PM		CS				2.76181e+06	15	184121	0.479574	88299.4	0.00226862	0.00185447	0.00244807	0.00285877	0.00222377	0.00206038	75.9015	86.758	130.197	109.375	122.988	119.296	115.88	115.22	139.883	108.291
sp|P19022|CADH2_HUMAN	P19022	P19022	CDH2	Cadherin-2	4	M	PM						5.49091e+06	31	177126	0.493336	87382.6	0.00224507	0.00224499	0.00164364	0.00445892	0.00313091	0.000125398	175.597	353.603	413.87	247.237	473.978	626.455	260.753	546.161	519.961	22.1896
sp|P30679|GNA15_HUMAN	P30679	P30679	GNA15	Guanine nucleotide-binding protein subunit alpha-15	2	M	PM						3.62545e+06	22	164793	0.518107	85380.6	0.00219363	0.00206741	0.00196523	0.00218176	0.00255371	0.00215459	1099.06	1098.51	809.975	997.232	516.01	1034.05	1452.72	1502.78	1627.28	1286.17
sp|Q10472|GALT1_HUMAN	Q10472	Q10472	GALNT1	Polypeptide N-acetylgalactosaminyltransferase 1	2	M				XC			4.3653e+06	28	155904	0.547648	85380.4	0.00219363	0.00314878	0.000861618	0.00164956	0.00215734	0.00294346	506.684	473.812	118.146	123.818	122.147	221.407	322.074	359.526	315.439	497.596
sp|Q9BZQ8|NIBAN_HUMAN	Q9BZQ8	Q9BZQ8	FAM129A	Protein Niban	2	M	PM						6.53157e+06	37	176529	0.471252	83189.7	0.00213734	0.00141815	0.00224264	0.00348818	0.00222085	0.00153315	697.616	432.435	886.403	653.075	734.646	948.76	565.904	750.007	828.701	525.217
sp|P52907|CAZA1_HUMAN	P52907	P52907	CAPZA1	F-actin-capping protein subunit alpha-1	1					XC			2.2918e+06	13	176292	0.469994	82856.2	0.00212877	0.00194487	0.0025972	0.00400117	0.00212573	0.000410655	433.448	301.438	419.539	384.431	408.343	553.163	317.851	364.892	310.179	71.5056
sp|P61073-2|CXCR4_HUMAN	P61073-2	P61073	CXCR4	Isoform 2 of C-X-C chemokine receptor type 4	1	M	PM		CS				1.38208e+06	10	138208	0.595367	82284.5	0.00211408	0.00420451	0.00208243	0.0014238	0.00158731	0.00134764	98.8778	236.499	98.046	111.864	60.3939	71.4366	91.18	98.8837	61.8978	85.1613
sp|Q9NZP8|C1RL_HUMAN	Q9NZP8	Q9NZP8	C1RL	Complement C1r subcomponent-like protein	3					XC			3.13803e+06	19	165160	0.48479	80067.8	0.00205713	0.0020635	0.00144192	0.00382083	0.0013134	0.00190729	267.338	237.671	164.674	158.606	432.822	392.545	225.242	167.54	188.583	246.8
sp|Q9NX76|CKLF6_HUMAN	Q9NX76	Q9NX76	CMTM6	CKLF-like MARVEL transmembrane domain-containing protein 6	1	M				XC			938680	6	156447	0.506298	79208.6	0.00203506	0.00209154	0.00159903	0.00236066	0.00202521	0.00210663	114.798	95.7528	69.7038	69.911	86.3247	96.3997	98.6823	102.684	91.8181	108.35
sp|O95477|ABCA1_HUMAN	O95477	O95477	ABCA1	ATP-binding cassette sub-family A member 1	5	M	PM						1.12403e+07	104	108080	0.731272	79035.9	0.00203062	0.00231262	0.00190621	0.00267865	0.00115402	0.00223502	294.935	1067.48	304.81	840.293	293.66	1102.88	289.913	589.953	565.755	1159.02
sp|Q14315|FLNC_HUMAN	Q14315	Q14315	FLNC	Filamin-C	7	M	PM						2.25379e+07	143	157608	0.475013	74865.7	0.00192348	0.00173149	0.00253139	0.00254281	0.00127848	0.00172172	661.928	664.881	815.056	928.301	1191.86	870.955	654.652	543.706	821.672	742.749
sp|P30041|PRDX6_HUMAN	P30041	P30041	PRDX6	Peroxiredoxin-6	2	M				XC			2.35407e+06	15	156938	0.469598	73697.7	0.00189347	0.00172088	0.00210045	0.00294841	0.00213267	0.000797758	249.484	179.031	213.338	208.688	210.979	273.606	225.531	245.725	230.48	93.2407
sp|P84157-2|MXRA7_HUMAN	P84157-2	P84157	MXRA7	Isoform 2 of Matrix-remodeling-associated protein 7	1	M						ShG	814614	5	162923	0.452295	73689.1	0.00189325	0.000822967	0.00296402	0.00295337	0.00108834	0.00188749	86.4537	40.5554	117.468	139.493	202.659	129.82	86.4321	59.3991	80.692	104.497
sp|Q9HC73|CRLF2_HUMAN	Q9HC73	Q9HC73	CRLF2	Cytokine receptor-like factor 2	1	M	PM			XC			1.87512e+06	17	110301	0.666972	73567.7	0.00189013	0.00159728	0.00144085	0.00329984	0.00112846	0.00216431	49.5665	74.5248	20.9802	64.2015	49.0126	137.332	41.9653	58.3117	62.0771	113.448
sp|Q9UP95|S12A4_HUMAN	Q9UP95	Q9UP95	SLC12A4	Solute carrier family 12 member 4	3	M	PM						6.67375e+06	47	141995	0.514005	72985.9	0.00187518	0.00166329	0.00132964	0.00208364	0.00250842	0.00173778	414.719	416.317	390.438	317.832	390.534	465.2	592.767	695.354	465.029	488.661
sp|P78552|I13R1_HUMAN	P78552	P78552	IL13RA1	Interleukin-13 receptor subunit alpha-1	1	M	PM						2.6168e+06	20	130840	0.557	72877.9	0.00187241	0.00133509	0.00212717	0.00196457	0.00160531	0.00232425	48.7223	77.3735	95.8518	117.731	70.6167	101.557	97.5776	103.036	125.48	151.329
sp|P08758|ANXA5_HUMAN	P08758	P08758	ANXA5	Annexin A5	3	M	PM				Nuc		3.27306e+06	22	148776	0.488808	72722.8	0.00186842	0.00139116	0.00191037	0.00415334	0.00209737	0.000217738	323.723	201.737	332.426	264.564	291.387	537.237	238.856	336.847	252.47	35.4731
sp|P13591|NCAM1_HUMAN	P13591	P13591	NCAM1	Neural cell adhesion molecule 1	1	M	PM		CS				5355566	37	144745	0.494356	71555.6	0.00183843	0.00177598	0.00154194	0.00359119	0.00241628	0.000184788	37.6272	56.9808	54.9851	47.2458	65.9434	102.775	56.1159	85.8591	91.6891	6.66072
sp|O75083|WDR1_HUMAN	O75083	O75083	WDR1	WD repeat-containing protein 1	1					XC			4491378	31	144883	0.489496	70919.7	0.0018221	0.00143473	0.0024079	0.00267165	0.00173977	0.00107557	862.173	611.674	832.93	980.376	867.516	1015.98	820.96	821.465	730.382	515.159
sp|P02760|AMBP_HUMAN	P02760	P02760	AMBP	Protein AMBP	2	M	PM		CS	XC			2.1457e+06	16	134106	0.52658	70617.5	0.00181433	0.00236391	0.00195325	0.0038836	0.000652627	0.000709346	315.652	385.431	300.625	304.143	425.794	564.817	201.857	117.849	106.599	129.936
sp|Q6PJF5|RHDF2_HUMAN	Q6PJF5	Q6PJF5	RHBDF2	Inactive rhomboid protein 2	1	M	PM						5002444	38	131643	0.52959	69716.9	0.0017912	0.0012336	0.00161508	0.00230901	0.00163026	0.00218474	313.511	314.421	359.163	393.13	489.453	524.953	372.064	460.195	525.04	625.591
sp|Q14766-4|LTBP1_HUMAN	Q14766-4	Q14766	LTBP1	Isoform 4 of Latent-transforming growth factor beta-binding protein 1	4					XC			9.45438e+06	69	137020	0.50406	69066.3	0.00177448	0.00146593	0.00137586	0.00350845	0.0010881	0.00168789	837.247	788.862	583.283	707.079	1494.79	1684.08	670.665	648.493	1184.86	1020.44
sp|P07948-2|LYN_HUMAN	P07948-2	P07948	LYN	Isoform 2 of Tyrosine-protein kinase Lyn	1	M	PM				Nuc		4.27542e+06	28	152694	0.442337	67542.1	0.00173532	0.00172943	0.00187866	0.00165346	0.00196965	0.00145269	73.4525	61.5099	72.9879	63.811	63.9292	52.4559	85.7126	77.5855	99.0378	58.0459
sp|P18206|VINC_HUMAN	P18206	P18206	VCL	Vinculin	9	M	PM			XC			1.0141e+07	74	137041	0.475393	65148.3	0.00167382	0.00136893	0.00236257	0.0024642	0.00126129	0.00113885	1589.32	1217.16	1794.03	2006.13	2323.9	1954.35	1384.9	1242.03	1247.49	1137.6
sp|Q8TD46-4|MO2R1_HUMAN	Q8TD46-4	Q8TD46	CD200R1	Isoform 4 of Cell surface glycoprotein CD200 receptor 1	1	M	PM			XC			2.75256e+06	18	152920	0.42451	64916.1	0.00166785	0.00374522	0.00167359	0.000763825	0.000537186	0.00164627	478.192	378.403	282.857	161.485	69.1914	68.8383	83.6914	60.1104	246.108	186.867
sp|P51148-2|RAB5C_HUMAN	P51148-2	P51148	RAB5C	Isoform 2 of Ras-related protein Rab-5C	1	M	PM						1.57697e+06	12	131415	0.493423	64843	0.00166597	0.00171181	0.0012379	0.0015464	0.00170681	0.00204373	76.5782	84.3183	62.0165	58.2313	66.7923	67.9434	111.723	93.1109	110.698	113.096
sp|P51511|MMP15_HUMAN	P51511	P51511	MMP15	Matrix metalloproteinase-15	1	M	PM			XC			3.11477e+06	25	124591	0.507971	63288.6	0.00162604	0.00162364	0.000454237	0.000908275	0.0029498	0.00188917	507.025	554.39	265.815	148.12	332.903	276.631	959.988	1115.49	665.105	724.689
sp|P12814-4|ACTN1_HUMAN	P12814-4	P12814	ACTN1	Isoform 4 of Alpha-actinin-1	3	M	PM			XC			7.76491e+06	54	143795	0.437121	62855.6	0.00161491	0.00121901	0.00230736	0.00266739	0.0012799	0.000873315	636.918	385.032	718.754	696.002	955.622	751.51	506.209	447.727	517.848	309.896
sp|P06213|INSR_HUMAN	P06213	P06213	INSR	Insulin receptor	3	M	PM						7.37067e+06	70	105295	0.596636	62823	0.00161407	0.00146731	0.00141042	0.00166394	0.00179628	0.00169861	602.719	883.877	619.847	811.373	553.37	894.053	621.701	1198.37	940.221	1149.52
sp|O75084|FZD7_HUMAN	O75084	O75084	FZD7	Frizzled-7	1	M	PM						2.43968e+06	18	135538	0.460773	62452.1	0.00160454	0.00169341	0.00129788	0.00278363	0.00237954	8.59724e-05	80.276	109.791	101.337	80.3614	149.928	160.982	108.272	170.863	178.392	6.26212
sp|P20273|CD22_HUMAN	P20273	P20273	CD22	B-cell receptor CD22	2	M	PM						4.89246e+06	29	168706	0.369936	62410.3	0.00160347	0.00142628	0.00150005	0.00179986	0.00152343	0.00177208	568.929	321.341	874.793	322.753	590.228	361.707	583.128	380.129	507.326	448.536
sp|Q9Y5Y0|FLVC1_HUMAN	Q9Y5Y0	Q9Y5Y0	FLVCR1	Feline leukemia virus subgroup C receptor-related protein 1	1	M	PM						1832074	15	122138	0.508892	62155.2	0.00159692	0.00178643	0.00134222	0.00133839	0.00201794	0.00143495	178.261	195.515	163.542	140.289	113.311	130.658	242.036	244.597	159.331	176.436
sp|Q8TDW0|LRC8C_HUMAN	Q8TDW0	Q8TDW0	LRRC8C	Volume-regulated anion channel subunit LRRC8C	1	M	PM						5.34171e+06	44	121403	0.498926	60570.9	0.00155621	0.00158971	0.00141088	0.00170632	0.00149018	0.00159585	134.776	132.94	114.542	112.676	132.857	127.279	136.352	138.014	145.154	149.928
sp|O43493|TGON2_HUMAN	O43493	O43493	TGOLN2	Trans-Golgi network integral membrane protein 2	3	M	PM						2.28171e+06	25	91268.6	0.657186	59980.4	0.00154104	0.00154224	0.000834486	0.00167633	0.00155518	0.00201923	138.126	185.657	42.1931	95.9363	55.5271	180.002	128.832	207.342	126.72	273.086
sp|P35241-5|RADI_HUMAN	P35241-5	P35241	RDX	Isoform 5 of Radixin	2	M	PM			XC			4.37127e+06	35	124894	0.479358	59868.7	0.00153817	0.00148883	0.00156856	0.00294302	0.00154612	0.000433013	422.33	407.941	476.944	410.451	564.102	719.292	408.534	469.187	452.573	133.294
sp|Q9UJU6|DBNL_HUMAN	Q9UJU6	Q9UJU6	DBNL	Drebrin-like protein	1	M	PM						2.49601e+06	20	124800	0.47715	59548.4	0.00152994	0.00136102	0.00167715	0.0028957	0.00143154	0.000567801	206.775	154.594	180.89	181.93	270.842	293.386	162.982	180.084	145.48	72.4565
sp|Q14344|GNA13_HUMAN	Q14344	Q14344	GNA13	Guanine nucleotide-binding protein subunit alpha-13	3	M	PM				Nuc		3.17185e+06	24	132160	0.445512	58879	0.00151274	0.00138617	0.00166364	0.00185906	0.00147612	0.00125827	365.734	275.145	373.625	315.361	313.691	329.152	455.166	324.5	389.497	280.591
sp|Q8WXI8|CLC4D_HUMAN	Q8WXI8	Q8WXI8	CLEC4D	C-type lectin domain family 4 member D	2	M	PM						1.43032e+06	10	143032	0.407454	58278.9	0.00149732	0.00170035	0.000979164	0.00141513	0.00121344	0.00210219	241.428	137.018	101.306	75.3526	127.415	101.717	185.783	108.294	235.086	190.311
sp|P23396-2|RS3_HUMAN	P23396-2	P23396	RPS3	Isoform 2 of 40S ribosomal protein S3	2	M	PM				Nuc		2.41126e+06	20	120563	0.476416	57438.2	0.00147572	0.00105501	0.00194452	0.00212586	0.00107763	0.00132796	123.443	96.9821	132.015	170.707	203.511	174.311	149.111	109.711	148.978	137.143
sp|Q9UIW2|PLXA1_HUMAN	Q9UIW2	Q9UIW2	PLXNA1	Plexin-A1	5	M	PM				Nuc		9.97007e+06	88	113296	0.499161	56553.1	0.00145298	0.00131469	0.00147564	0.00178029	0.00171846	0.00103525	247.548	419.503	485.558	449.675	505.181	506.712	486.828	607.296	637.104	371.118
sp|O75976|CBPD_HUMAN	O75976	O75976	CPD	Carboxypeptidase D	3	M				XC	Nuc		6.83123e+06	71	96214.5	0.55903	53786.8	0.00138191	0.00132342	0.00092371	0.00123064	0.00146865	0.00185807	519.024	509.069	428.44	339.328	262.877	422.247	478.925	625.67	439.962	802.963
sp|O00161|SNP23_HUMAN	O00161	O00161	SNAP23	Synaptosomal-associated protein 23	1	M	PM						1.29299e+06	12	107749	0.488304	52614.3	0.00135179	0.000779326	0.00121725	0.00214514	0.00119998	0.00149546	99.3995	88.0447	160.557	131.332	168.715	216.172	164.172	150.144	219.807	189.808
sp|Q00610|CLH1_HUMAN	Q00610	Q00610	CLTC	Clathrin heavy chain 1	4	M	PM			XC			9.40045e+06	88	106823	0.488843	52219.8	0.00134165	0.0010544	0.00139017	0.00193611	0.00126513	0.00115955	1283.27	1008.43	1159.06	1269.72	1496.72	1651.68	1355.88	1340.05	1518.28	1245.89
sp|O43707|ACTN4_HUMAN	O43707	O43707	ACTN4	Alpha-actinin-4	3					XC	Nuc		5.9605e+06	55	108373	0.48026	52047.1	0.00133721	0.000878912	0.00175599	0.00202164	0.00117975	0.00100099	841.35	543.76	956.649	1037.5	1260.36	1115.64	764.78	808.348	723.2	695.741
sp|Q14118|DAG1_HUMAN	Q14118	Q14118	DAG1	Dystroglycan	1	M	PM			XC			4.04517e+06	39	103722	0.500593	51922.6	0.00133402	0.00163586	0.00140884	0.00158249	0.000943777	0.00118916	182.533	201.794	216.471	165.97	151.678	174.126	151.571	128.938	131.394	164.799
sp|P52272|HNRPM_HUMAN	P52272	P52272	HNRNPM	Heterogeneous nuclear ribonucleoprotein M	3	M	PM			XC			5.21528e+06	46	113376	0.45753	51872.8	0.00133274	0.000753465	0.00192194	0.00221451	0.000960139	0.0010147	438.885	269.605	569.84	656.764	851.483	706.806	499.388	380.493	511.536	407.903
sp|Q99714|HCD2_HUMAN	Q99714	Q99714	HSD17B10	3-hydroxyacyl-CoA dehydrogenase type-2	1	M	PM						1.46225e+06	14	104447	0.48963	51140.3	0.00131392	0.00114476	0.00116055	0.00187773	0.00131202	0.00114906	129.133	102.999	113.495	99.7209	113.774	150.698	118.385	130.739	150.947	116.149
sp|P08567|PLEK_HUMAN	P08567	P08567	PLEK	Pleckstrin	1	M				XC			1004964	11	91360.4	0.556837	50872.8	0.00130705	0.000783633	0.0010693	0.00151177	0.00146167	0.00166007	356.82	450.612	530.845	587.21	554.175	775.413	673.101	930.866	922.478	1072.44
sp|Q14699|RFTN1_HUMAN	Q14699	Q14699	RFTN1	Raftlin	2	M	PM						2.98698e+06	28	106678	0.470101	50149.4	0.00128846	0.000902882	0.000731662	0.00164086	0.000999309	0.00211023	264.961	216.704	231.5	167.707	403.069	351.289	268.679	265.634	601.888	569.011
sp|O95274|LYPD3_HUMAN	O95274	O95274	LYPD3	Ly6/PLAUR domain-containing protein 3	1	M	PM			XC			1.22031e+06	16	76269.1	0.632474	48238.2	0.00123936	0.00172789	0.00104778	0.00117358	0.000525119	0.00172368	97.1339	252.797	51.4078	146.396	140.912	153.154	99.1171	85.0867	146.469	283.313
sp|Q969Z4|TR19L_HUMAN	Q969Z4	Q969Z4	RELT	Tumor necrosis factor receptor superfamily member 19L	2	M	PM						1.72145e+06	17	101262	0.476344	48235.3	0.00123928	0.000681928	0.000913442	0.00144539	0.00143526	0.00165553	506.939	390.227	688.939	499.188	740.784	737.77	832.782	909.612	1189.35	1064.32
sp|P01854|IGHE_HUMAN	P01854	P01854	IGHE	Ig epsilon chain C region	1	M	PM			XC			1.82096e+06	19	95840	0.494116	47356.1	0.00121669	0.000770255	0.000420441	0.00101663	0.000698321	0.00296079	392.608	393.747	201.79	205.255	217.647	463.558	340.888	395.354	2080.58	1700.38
sp|P01859|IGHG2_HUMAN	P01859	P01859	IGHG2	Ig gamma-2 chain C region	1	M	PM			XC			1.1646e+06	13	89584.4	0.515917	46218.1	0.00118745	0.00130198	0.00102897	0.00116686	0.00107836	0.00134412	187.031	178.751	140.126	134.913	193.616	142.897	142.89	163.968	113.103	207.318
sp|Q99497|PARK7_HUMAN	Q99497	Q99497	PARK7	Protein deglycase DJ-1	2	M	PM				Nuc		1.24278e+06	12	103565	0.445292	46116.8	0.00118485	0.000646685	0.00175792	0.00187437	0.000656624	0.00115001	189.402	99.0239	204.83	257.07	377.386	256.012	187.364	111.356	188.693	197.835
sp|P27487|DPP4_HUMAN	P27487	P27487	DPP4	Dipeptidyl peptidase 4	3	M	PM		CS				4.0238e+06	39	103174	0.444117	45821.5	0.00117726	0.00089072	0.000862676	0.0014833	0.00114542	0.00148814	225.015	212.835	213.662	196.859	388.864	316.148	409.032	303.12	551.355	399.485
sp|P25311|ZA2G_HUMAN	P25311	P25311	AZGP1	Zinc-alpha-2-glycoprotein	1	M	PM			XC	Nuc		1633864	18	90770.2	0.504669	45808.9	0.00117694	0.00102351	0.00106977	0.00100879	0.00110627	0.00160778	274.142	201.101	204.646	200.732	217.577	176.8	286.422	240.73	169.744	354.898
sp|Q96FQ6|S10AG_HUMAN	Q96FQ6	Q96FQ6	S100A16	Protein S100-A16	1	M	PM						629723	6	104954	0.434804	45634.3	0.00117246	0.000551326	0.00191258	0.00165357	0.000656979	0.00122235	84.1463	41.5984	101.32	137.814	226.833	111.289	85.4886	54.8994	86.1398	103.614
sp|Q9BZW8|CD244_HUMAN	Q9BZW8	Q9BZW8	CD244	Natural killer cell receptor 2B4	1	M	PM						1217049	15	81136.6	0.550555	44670.2	0.00114768	0.00142889	0.00112443	0.00123442	0.000964763	0.00102861	71.3874	100.543	64.7711	75.5598	54.6496	77.4775	76.3837	75.1835	67.5738	81.313
sp|Q15149|PLEC_HUMAN	Q15149	Q15149	PLEC	Plectin	24	M	PM						2.82203e+07	291	96976.8	0.460284	44636.9	0.00114683	0.000732876	0.00159204	0.00183405	0.00088894	0.000845424	3218.38	2181.07	3961.94	4524.8	6167.54	4868.67	3526.07	2929.95	3448.07	2826.63
sp|Q9HCN6-3|GPVI_HUMAN	Q9HCN6-3	Q9HCN6	GP6	Isoform 3 of Platelet glycoprotein VI	1	M	PM		CS				2.20986e+06	29	76202	0.585641	44627	0.00114658	0.00189315	0.00115452	0.000934534	0.00076138	0.00102337	164.735	376.911	97.9195	219.512	287.649	165.961	111.585	167.881	158.254	228.898
sp|Q9UP38|FZD1_HUMAN	Q9UP38	Q9UP38	FZD1	Frizzled-1	1	M	PM		CS				1.87335e+06	24	78056.2	0.56896	44410.8	0.00114102	0.000916465	0.000836061	0.00184923	0.00215611	3.71538e-05	50.5118	114.686	129.89	99.9168	131.58	206.416	92.8476	298.823	144.476	5.2234
sp|Q6UWB1|I27RA_HUMAN	Q6UWB1	Q6UWB1	IL27RA	Interleukin-27 receptor subunit alpha	1	M	PM						1.56083e+06	25	62433.2	0.702027	43829.8	0.00112609	0.00115881	0.00160697	0.00113751	0.000573028	0.00122435	304.26	660.976	397.817	875.361	232.819	578.744	174.798	361.991	274.698	784.574
sp|O15552|FFAR2_HUMAN	O15552	O15552	FFAR2	Free fatty acid receptor 2	4	M	PM						2.72002e+06	13	209232	0.209133	43757.3	0.00112423	0.00135546	0.00134606	0.00112061	0.00109768	0.000758899	456.395	136.258	772.263	129.225	289.448	100.483	394.761	122.208	257.348	85.7071
sp|Q14956|GPNMB_HUMAN	Q14956	Q14956	GPNMB	Transmembrane glycoprotein NMB	2	M	PM						1.42638e+06	20	71319	0.607044	43293.7	0.00111232	0.001415	0.00119041	0.00116955	0.000951468	0.000889648	276.582	523.039	297.996	420.22	231.811	385.613	298.87	389.51	246.25	369.444
sp|O00481|BT3A1_HUMAN	O00481	O00481	BTN3A1	Butyrophilin subfamily 3 member A1	2	M	PM						1.97852e+06	25	79141	0.539276	42678.9	0.00109652	0.00152691	0.00112351	0.00115647	0.000774708	0.000960143	279.195	375.958	279.449	264.185	218.77	253.99	198.456	211.257	195.413	265.593
sp|P35625|TIMP3_HUMAN	P35625	P35625	TIMP3	Metalloproteinase inhibitor 3	1	M				XC	Nuc		1.11549e+06	11	101408	0.417831	42371.5	0.00108863	0.000596694	0.00184673	0.00138908	0.000612862	0.00111253	203.36	109.011	292.528	322.201	558.55	226.362	174.375	124.002	178.313	228.341
sp|P32418|NAC1_HUMAN	P32418	P32418	SLC8A1	Sodium/calcium exchanger 1	2	M	PM						2.90925e+06	34	85566.2	0.485838	41571.3	0.00106807	0.000450008	0.00065396	0.00120816	0.00106994	0.00185715	280.655	268.397	380.025	372.49	811.163	642.748	565.621	706.747	1385.91	1244.4
sp|Q9P258|RCC2_HUMAN	Q9P258	Q9P258	RCC2	Protein RCC2	1	M	PM						2158880	27	79958.5	0.516127	41268.7	0.00106029	0.000722159	0.000844618	0.00118524	0.00118715	0.00132034	238.194	212.039	197.951	236.836	283.64	310.417	393.273	386.045	369.024	435.537
sp|P51884|LUM_HUMAN	P51884	P51884	LUM	Lumican	1					XC			1466990	16	91686.9	0.44976	41237.1	0.00105948	0.000509301	0.00132952	0.0012024	0.00107283	0.00119302	209.21	120.134	275.158	299.497	359.594	252.987	344.742	280.265	363.843	316.151
sp|P06744-2|G6PI_HUMAN	P06744-2	P06744	GPI	Isoform 2 of Glucose-6-phosphate isomerase	3	M	PM			XC			2.5215e+06	28	90053.5	0.457867	41232.5	0.00105936	0.000591537	0.00154379	0.00161193	0.000645526	0.00103322	376.907	231.974	458.182	578.164	867.016	563.85	380.233	280.362	415.46	455.205
sp|P27105|STOM_HUMAN	P27105	P27105	STOM	Erythrocyte band 7 integral membrane protein	1	M	PM			XC			1.262e+06	15	84133.4	0.48522	40823.3	0.00104885	0.000458319	0.00158863	0.00191004	0.000479591	0.000993054	206.831	112.927	280.258	373.817	475.425	419.788	212.108	130.873	217.615	274.889
sp|O95445|APOM_HUMAN	O95445	O95445	APOM	Apolipoprotein M	1	M	PM			XC			766395	10	76639.5	0.524288	40181.2	0.00103235	0.0014362	0.000652656	0.00134547	0.000768614	0.00100703	116.602	149.81	88.0133	65.0153	129.733	125.187	97.167	88.7938	64.6391	118.011
sp|Q05682-4|CALD1_HUMAN	Q05682-4	Q05682	CALD1	Isoform 4 of Caldesmon	2	M	PM						1.91687e+06	22	87130.2	0.458405	39941	0.00102618	0.000511	0.00159777	0.0016517	0.000516408	0.00100476	157.584	96.4274	211.544	287.937	459.544	278.016	165.643	107.925	167.444	213.008
sp|P02751-15|FINC_HUMAN	P02751-15	P02751	FN1	Isoform 15 of Fibronectin	9	M	PM			XC			1.12943e+07	96	117649	0.339381	39927.7	0.00102584	0.000505969	0.00165126	0.00131016	0.000698828	0.00105357	1121.15	346.992	1025.58	1081.47	2472.98	801.451	1143.94	530.779	1190.23	811.733
sp|Q03167|TGBR3_HUMAN	Q03167	Q03167	TGFBR3	Transforming growth factor beta receptor type 3	1	M	PM		CS	XC			2.37395e+06	30	79131.5	0.50091	39637.8	0.00101839	0.00101909	0.000914289	0.00197034	0.00126496	0.000107373	68.3309	136.198	136.723	116.694	186.851	234.886	121.394	187.234	175.322	16.1216
sp|Q9UIG8|SO3A1_HUMAN	Q9UIG8	Q9UIG8	SLCO3A1	Solute carrier organic anion transporter family member 3A1	1	M	PM						1.77553e+06	19	93449	0.42276	39506.5	0.00101502	0.000782865	0.000622378	0.00148104	0.00102282	0.00117772	150.612	100.825	124.15	76.5493	209.724	170.14	221.81	145.891	200.077	170.404
sp|Q15833|STXB2_HUMAN	Q15833	Q15833	STXBP2	Syntaxin-binding protein 2	1	M	PM						2.71389e+06	33	82239.2	0.473738	38959.8	0.00100097	0.000769068	0.000788501	0.00111789	0.00100934	0.00128692	296.379	242.182	274.993	237.129	388.448	314.004	358.457	352.018	459.806	455.287
sp|P23634|AT2B4_HUMAN	P23634	P23634	ATP2B4	Plasma membrane calcium-transporting ATPase 4	2	M	PM						4.38878e+06	57	76996.2	0.50117	38588.2	0.000991423	0.000839769	0.000669048	0.000962768	0.00127524	0.00114341	509.547	492.649	396.043	374.835	427.36	503.8	780.279	828.545	826.404	753.592
sp|P00441|SODC_HUMAN	P00441	P00441	SOD1	Superoxide dismutase [Cu-Zn]	2	M				XC	Nuc		726874	8	90859.2	0.424426	38563	0.000990776	0.000648786	0.00146911	0.00152498	0.000680388	0.000770415	132.804	80.3216	163.716	173.696	244.141	168.404	153.034	93.2901	150.989	107.154
sp|P04632|CPNS1_HUMAN	P04632	P04632	CAPNS1	Calpain small subunit 1	1	M	PM						915428	11	83220.8	0.460151	38294.1	0.000983867	0.000513296	0.0015999	0.00150195	0.000478109	0.0009663	81.9855	50.6619	108.444	150.803	240.177	132.23	75.1458	52.2622	72.7574	107.147
sp|Q5T3F8|CSCL2_HUMAN	Q5T3F8	Q5T3F8	TMEM63B	CSC1-like protein 2	1	M	PM						2.34815e+06	28	83862.6	0.446743	37465	0.000962567	0.000974943	0.000646504	0.000844159	0.00115738	0.00112219	96.5716	75.7502	67.0102	47.9713	72.5534	58.5043	130.076	99.5927	104.109	97.9548
sp|Q8NC51-3|PAIRB_HUMAN	Q8NC51-3	Q8NC51	SERBP1	Isoform 3 of Plasminogen activator inhibitor 1 RNA-binding protein	1	M	PM				Nuc		1.74398e+06	19	91788.6	0.408101	37459.1	0.000962413	0.000841836	0.00112721	0.00156098	0.000834884	0.000580126	223.069	182.093	232.575	232.85	356.734	301.177	336.212	200.004	384.596	140.975
sp|Q29983|MICA_HUMAN	Q29983	Q29983	MICA	MHC class I polypeptide-related sequence A	1	M	PM		CS	XC			1.46268e+06	19	76983.3	0.486088	37420.6	0.000961425	0.000799871	0.000933696	0.00131243	0.0011238	0.000690045	220.036	186.075	270.633	207.434	205.574	272.334	323.206	289.538	181.289	180.344
sp|P13010|XRCC5_HUMAN	P13010	P13010	XRCC5	X-ray repair cross-complementing protein 5	1	M	PM				Nuc		3.0547e+06	38	80386.9	0.465172	37393.7	0.000960734	0.000825268	0.000965013	0.00121124	0.000991954	0.000848006	332.539	277.869	304.518	310.302	411.751	363.776	364.734	369.901	475.055	320.775
sp|Q9BXP2|S12A9_HUMAN	Q9BXP2	Q9BXP2	SLC12A9	Solute carrier family 12 member 9	2	M	PM						2222281	30	74076	0.502759	37242.4	0.000956847	0.00109631	0.000404232	0.00115876	0.000834413	0.00126285	196.281	155.023	72.7447	54.5879	104.877	146.154	164.261	130.674	141.35	200.617
sp|Q53RT3|APRV1_HUMAN	Q53RT3	Q53RT3	ASPRV1	Retroviral-like aspartic protease 1	1	M						ShG	917093	11	83372.1	0.444981	37099	0.000953162	0.00063588	0.000864836	0.000845158	0.00130655	0.00104804	1101.98	282.064	334.088	366.362	437.299	334.401	491.166	641.869	313.365	522.281
sp|Q9P2B2|FPRP_HUMAN	Q9P2B2	Q9P2B2	PTGFRN	Prostaglandin F2 receptor negative regulator	1	M			CS				3.29731e+06	48	68693.9	0.51766	35560.1	0.000913624	0.000875142	0.000980885	0.00146098	0.00122061	0.000153488	64.6893	134.079	126.57	143.518	163.458	199.657	108.929	207.113	198.642	26.4186
sp|B0I1T2|MYO1G_HUMAN	B0I1T2	B0I1T2	MYO1G	Unconventional myosin-Ig	2	M	PM						4.21518e+06	53	79531.7	0.436857	34744	0.000892657	0.000416003	0.00062622	0.00130267	0.000737296	0.00137104	266.708	216.337	410.962	311.005	772.577	604.268	520.272	424.644	1068.18	801.014
sp|Q7L1W4|LRC8D_HUMAN	Q7L1W4	Q7L1W4	LRRC8D	Volume-regulated anion channel subunit LRRC8D	1	M	PM						2.87394e+06	44	65316.7	0.507504	33148.5	0.000851664	0.000634113	0.000847468	0.00118256	0.000665551	0.000969629	137.477	110.561	140.365	141.112	190.39	183.915	98.8058	128.518	164.701	189.931
sp|P36543|VATE1_HUMAN	P36543	P36543	ATP6V1E1	V-type proton ATPase subunit E 1	2	M	PM						933439	13	71803	0.46126	33119.9	0.000850929	0.000611735	0.00101979	0.00154734	0.000773928	0.000443277	256.876	187.541	324.738	298.572	384.774	423.131	288.515	262.773	292.3	152.673
sp|Q9UKY7|CDV3_HUMAN	Q9UKY7	Q9UKY7	CDV3	Protein CDV3 homolog	1	M	PM						694616	10	69461.6	0.468863	32568	0.00083675	0.000424594	0.00134555	0.00124971	0.000507233	0.000768072	53.8446	32.8852	77.9649	99.5247	128.889	86.3361	68.9302	43.5092	43.1671	66.8318
sp|O00478|BT3A3_HUMAN	O00478	O00478	BTN3A3	Butyrophilin subfamily 3 member A3	2	M	PM						1.52558e+06	22	69344.5	0.469124	32531.2	0.000835805	0.000982781	0.000927329	0.000950319	0.000700597	0.000669547	148.409	146.141	175.8	131.691	149.605	126.05	122.699	115.38	117.678	111.854
sp|P25024|CXCR1_HUMAN	P25024	P25024	CXCR1	C-X-C chemokine receptor type 1	1	M	PM						744536	13	57272	0.542385	31063.5	0.000798095	9.67934e-05	0.0014428	0.000773171	0.000735747	0.000955548	7.43415	10.9028	109.062	155.204	112.239	77.6831	82.6981	91.7845	73.716	120.921
sp|P09525|ANXA4_HUMAN	P09525	P09525	ANXA4	Annexin A4	1	M	PM		CS		Nuc		1.51744e+06	22	68974.7	0.435986	30072	0.000772622	0.000417393	0.00136093	0.000994012	0.000433902	0.000746855	91.3951	55.2279	134.568	171.97	248.586	117.318	97.4624	63.5847	99.551	111.021
sp|O43852-4|CALU_HUMAN	O43852-4	O43852	CALU	Isoform 4 of Calumenin	1	M				XC			1.84141e+06	17	108318	0.277547	30063.3	0.000772399	0.000819711	0.000876618	0.00142014	0.000777601	0.000122277	140.096	91.8625	99.4885	93.8194	290.15	141.96	285.363	96.5121	329.048	15.3949
sp|Q6E0U4|DMKN_HUMAN	Q6E0U4	Q6E0U4	DMKN	Dermokine	1					XC			1192463	16	74528.9	0.397176	29601.1	0.000760523	0.000363402	0.000567052	0.00161991	0.000623183	0.000731535	126.292	52.0234	131.708	77.5246	285.015	206.852	150.76	98.8042	145.339	117.653
sp|P35580-4|MYH10_HUMAN	P35580-4	P35580	MYH10	Isoform 4 of Myosin-10	3	M	PM				Nuc		5.99739e+06	103	58227.1	0.493354	28726.6	0.000738055	0.000458218	0.000854903	0.00128332	0.000548606	0.00064165	244.43	192.204	308.315	342.462	481.234	480.158	274.137	254.858	306.293	302.373
sp|Q07108|CD69_HUMAN	Q07108	Q07108	CD69	Early activation antigen CD69	1	M	PM						958690	7	136956	0.208516	28557.5	0.00073371	0.00124342	0.00107435	0.000409715	0.000459943	0.000517578	579.758	224.065	865.796	184.888	582.426	65.8565	260.37	91.7932	260.086	104.783
sp|Q15907|RB11B_HUMAN	Q15907	Q15907	RAB11B	Ras-related protein Rab-11B	2	M	PM						924276	15	61618.4	0.456859	28151	0.000723265	0.000332793	0.00107437	0.00125986	0.000435085	0.000630426	171.689	78.9558	220.224	243.426	359.01	266.618	155.353	114.322	129.643	168.034
sp|P20020|AT2B1_HUMAN	P20020	P20020	ATP2B1	Plasma membrane calcium-transporting ATPase 1	4	M	PM				Nuc		2.79985e+06	52	53843.2	0.519032	27946.4	0.000718009	0.000355859	0.000769224	0.000973623	0.000620963	0.000889548	511.532	420.239	596.086	867.513	1132.48	1025.58	837.764	812.142	912.004	1180.16
sp|P05413|FABPH_HUMAN	P05413	P05413	FABP3	Fatty acid-binding protein, heart	1					XC			682798	10	68279.8	0.405741	27703.9	0.000711779	0.000379533	0.00137194	0.000875549	0.000422621	0.000601366	43.2932	32.7755	93.2877	113.146	192.752	67.4433	64.464	40.4203	63.3565	58.3437
sp|Q32MZ4|LRRF1_HUMAN	Q32MZ4	Q32MZ4	LRRFIP1	Leucine-rich repeat flightless-interacting protein 1	1	M	PM				Nuc		1.8206e+06	35	52017.1	0.521009	27101.4	0.000696299	0.000606876	0.000627404	0.00093314	0.000827662	0.000516918	177.336	176.247	156.993	174.01	205.8	241.728	194.541	266.209	209.367	168.655
sp|P13667|PDIA4_HUMAN	P13667	P13667	PDIA4	Protein disulfide-isomerase A4	1				CS				2059587	38	54199.7	0.496128	26890	0.000690868	0.000751819	0.000750575	0.000870028	0.000617836	0.000515607	33.9481	36.5679	32.1448	34.8647	32.5543	37.7466	38.3275	33.2819	36.3246	28.1747
sp|O60637|TSN3_HUMAN	O60637	O60637	TSPAN3	Tetraspanin-3	1	M	PM						509938	9	56659.8	0.474317	26874.7	0.000690476	0.000220532	0.00102536	0.00110204	0.000360583	0.000822554	59.8595	27.8295	93.6461	123.571	188.798	124.048	70.883	50.395	77.1877	116.615
sp|Q9BZZ2|SN_HUMAN	Q9BZZ2	Q9BZZ2	SIGLEC1	Sialoadhesin	3	M	PM			XC			5.45836e+06	62	88038.1	0.295233	25991.7	0.00066779	0.00080237	0.000634706	0.000809316	0.000553954	0.000575976	618.429	294.947	792.117	222.817	670.407	265.367	426.48	225.523	468.202	237.864
sp|P31641|SC6A6_HUMAN	P31641	P31641	SLC6A6	Sodium- and chloride-dependent taurine transporter	1	M	PM						902104	17	53064.9	0.481152	25532.3	0.000655986	0.000825539	0.000456622	0.000755881	0.00057705	0.000673039	119.629	129.729	105.452	68.5269	79.4622	105.953	117.986	100.429	141.941	118.821
sp|P43353|AL3B1_HUMAN	P43353	P43353	ALDH3B1	Aldehyde dehydrogenase family 3 member B1	1	M	PM						911695	20	45584.8	0.559103	25486.6	0.000654811	0.000590991	0.000582273	0.000713402	0.000580577	0.00079994	104.326	122.104	90.8789	114.89	69.2447	131.475	130.487	132.849	146.816	185.679
sp|P98196|AT11A_HUMAN	P98196	P98196	ATP11A	Probable phospholipid-transporting ATPase IH	1	M	PM						2488058	51	48785.5	0.521972	25464.6	0.000654248	0.000591729	0.000517002	0.000641719	0.000891928	0.000602204	384.249	331.152	307.807	276.313	192.374	320.337	340.744	552.817	477.537	378.619
sp|Q96CT7|CC124_HUMAN	Q96CT7	Q96CT7	CCDC124	Coiled-coil domain-containing protein 124	1	M	PM						665476	12	55456.3	0.458028	25400.5	0.000652601	0.00025326	0.000893834	0.00106932	0.000357527	0.000763019	40.9354	18.9492	52.8928	63.8684	99.5765	71.3659	52.8467	29.6265	47.1387	64.1378
sp|Q9BXX0|EMIL2_HUMAN	Q9BXX0	Q9BXX0	EMILIN2	EMILIN-2	1					XC			2.34804e+06	49	47919.1	0.528667	25333.2	0.000650872	0.000685344	0.000496427	0.000754921	0.000663196	0.000656714	387.7	396.902	279.653	274.559	355.95	389.973	402.409	425.368	280.785	427.273
sp|P01857|IGHG1_HUMAN	P01857	P01857	IGHG1	Ig gamma-1 chain C region	2	M	PM			XC			808198	15	53879.9	0.469521	25297.8	0.00064996	0.00110517	0.00053249	0.000517841	0.000534564	0.000563288	487.921	482.189	267.73	221.874	268.048	201.532	361.079	258.307	242.183	276.105
sp|P54577|SYYC_HUMAN	P54577	P54577	YARS	Tyrosine--tRNA ligase, cytoplasmic	1					XC	Nuc		1.96709e+06	36	54641.5	0.462187	25254.6	0.000648851	0.000288248	0.00103562	0.000900344	0.00036832	0.000717925	178.061	100.483	268.135	344.77	522.401	279.957	179.586	142.199	188.323	281.163
sp|Q8TCT7|SPP2B_HUMAN	Q8TCT7	Q8TCT7	SPPL2B	Signal peptide peptidase-like 2B	1	M	PM						1.37811e+06	27	51041.2	0.486081	24810.2	0.000637433	0.000580289	0.000432084	0.000815624	0.000637492	0.000721321	163.652	124.667	123.462	88.6504	132.201	156.299	146.973	151.681	168.93	174.097
sp|P23141-2|EST1_HUMAN	P23141-2	P23141	CES1	Isoform 2 of Liver carboxylesterase 1	1					XC			1.58875e+06	30	52958.2	0.462215	24478.1	0.000628901	0.00077754	0.000710167	0.00108951	0.000579952	0.000110057	169.959	124.925	133.179	108.967	120.682	156.141	96.8235	103.197	76.3423	19.8655
sp|Q16181|SEPT7_HUMAN	Q16181	Q16181	SEPT7	Septin-7	1	M	PM				Nuc		1156117	22	52550.8	0.464922	24432	0.000627717	0.000312264	0.000881471	0.00102028	0.000288193	0.00071582	64.7954	35.2166	82.0729	94.9376	151.976	102.637	54.953	35.9962	59.93	90.6951
sp|Q9BSJ8-2|ESYT1_HUMAN	Q9BSJ8-2	Q9BSJ8	ESYT1	Isoform 2 of Extended synaptotagmin-1	1	M	PM						2.08759e+06	46	45382.5	0.529796	24043.4	0.000617734	0.000519555	0.000487133	0.000645333	0.00063212	0.000780046	158.544	131.133	97.9467	117.418	94.6521	145.286	164.145	176.696	187.378	221.185
sp|O75882|ATRN_HUMAN	O75882	O75882	ATRN	Attractin	2	M	PM			XC			2.61561e+06	61	42878.8	0.558232	23936.3	0.000614982	0.000681135	0.000811729	0.000762989	0.000444237	0.000439658	286.349	404.707	430.283	460.6	274.629	404.375	284.847	292.328	192.272	293.479
sp|P47755|CAZA2_HUMAN	P47755	P47755	CAPZA2	F-actin-capping protein subunit alpha-2	1	M				XC			628159	13	48319.9	0.47068	22743.2	0.000584328	0.000390975	0.000825045	0.000903092	0.000371585	0.000508445	107.893	82.4023	141.206	166.063	243.55	169.778	109.937	86.7355	100.696	120.39
sp|P78380|OLR1_HUMAN	P78380	P78380	OLR1	Oxidized low-density lipoprotein receptor 1	1	M	PM						442693	10	44269.3	0.497781	22036.4	0.000566168	0.000642174	0.000645957	0.000580559	0.000508974	0.000475645	78.4826	93.9904	89.4453	90.2901	89.8734	75.7942	87.24	82.5039	79.5	78.2112
sp|P41231|P2RY2_HUMAN	P41231	P41231	P2RY2	P2Y purinoceptor 2	1	M	PM						696907	16	43556.7	0.49523	21570.6	0.0005542	0.000597186	0.0003246	0.000630087	0.000676161	0.000530628	46.72	53.8475	34.7557	27.9518	44.5709	50.6774	56.7229	67.5233	75.8716	53.7528
sp|Q6P4Q7|CNNM4_HUMAN	Q6P4Q7	Q6P4Q7	CNNM4	Metal transporter CNNM4	1	M	PM						1.82257e+06	40	45564.2	0.471897	21501.6	0.000552429	0.000378017	0.000591584	0.000747317	0.000547762	0.000524255	48.6698	47.5236	92.2818	71.0262	86.1683	83.8032	69.6573	76.2671	97.8919	74.0449
sp|P05161|ISG15_HUMAN	P05161	P05161	ISG15	Ubiquitin-like protein ISG15	1					XC			811974	9	90219.3	0.234368	21144.5	0.000543252	0.00046361	0.000603633	0.00064184	0.000631942	0.000397109	175.126	60.239	294.831	74.9037	253.459	74.3893	237.033	90.9391	210.502	57.9682
sp|P09543|CN37_HUMAN	P09543	P09543	CNP	2',3'-cyclic-nucleotide 3'-phosphodiesterase	1	M	PM			XC	Nuc		1.11595e+06	28	39855.3	0.530025	21124.3	0.000542733	0.000621509	0.000542733	0.000642491	0.000447914	0.000486884	81.4349	83.3853	59.1187	69.5398	51.3359	76.8896	55.0953	66.5556	80.881	73.3875
sp|P00450|CERU_HUMAN	P00450	P00450	CP	Ceruloplasmin	1	M				XC			1777295	46	38636.8	0.523861	20240.3	0.000520023	0.000831182	0.000460372	0.000835348	0.000284698	0.000275389	51.3535	78.7819	55.0134	41.672	81.3799	70.6246	19.535	29.8857	20.2068	29.3246
sp|Q15084-2|PDIA6_HUMAN	Q15084-2	Q15084	PDIA6	Isoform 2 of Protein disulfide-isomerase A6	1	M	PM						741769	17	43633.5	0.462904	20198.1	0.000518938	0.000257883	0.000762098	0.000771966	0.000314548	0.0005452	121.27	65.2804	163.91	184.236	272.195	174.307	104.635	88.1848	111.961	155.049
sp|Q13835-2|PKP1_HUMAN	Q13835-2	Q13835	PKP1	Isoform 1 of Plakophilin-1	1	M	PM				Nuc		2.12733e+06	45	47274	0.40251	19028.3	0.000488882	0.000591409	0.000400323	0.000428142	0.000523826	0.000486678	337.498	190.604	212.696	123.214	188.349	123.081	234.814	186.973	214.299	176.214
sp|P15311|EZRI_HUMAN	P15311	P15311	EZR	Ezrin	2	M	PM			XC			1.2978e+06	34	38170.5	0.480178	18328.7	0.000470907	0.000230374	0.000708011	0.000780058	0.000227372	0.00047808	137.977	90.8921	197.585	266.77	362.041	274.523	165.402	99.3524	158.332	211.908
sp|P18084|ITB5_HUMAN	P18084	P18084	ITGB5	Integrin beta-5	2	M	PM		CS				1.55498e+06	44	35340.5	0.511784	18086.7	0.000464691	0.000839141	0.000457956	0.00039777	0.000360373	0.000293085	178.828	214.153	179.38	111.614	62.9674	90.5483	86.7031	101.857	66.5939	84.0309
sp|P04275|VWF_HUMAN	P04275	P04275	VWF	von Willebrand factor	3	M	PM			XC			5.03819e+06	132	38168.1	0.468385	17877.4	0.000459313	0.000350888	0.0001898	0.000850274	0.000199069	0.000731065	951.243	685.677	409.099	354.203	1724.74	1482.07	612.053	430.826	1475.86	1604.95
sp|P68366|TBA4A_HUMAN	P68366	P68366	TUBA4A	Tubulin alpha-4A chain	1					XC			866653	21	41269.2	0.429904	17741.8	0.000455829	0.000444037	0.000525782	0.000761168	0.00046537	0.000155025	335.526	168.944	219.959	191.044	224.142	258.323	192.422	196.096	195.811	66.2643
sp|P16234|PGFRA_HUMAN	P16234	P16234	PDGFRA	Platelet-derived growth factor receptor alpha	1	M	PM				Nuc		1.72801e+06	51	33882.5	0.499215	16914.7	0.000434578	0.000350676	0.000439335	0.000740704	0.000700515	0	31.7515	47.8433	44.7431	57.2422	72.5549	90.1401	61.7117	105.847	91.2582	0
sp|P02788|TRFL_HUMAN	P02788	P02788	LTF	Lactotransferrin	1				CS	XC	Nuc		1438111	46	31263.3	0.529983	16569	0.000425698	0.000337671	0.000688931	0.000427715	0.000302392	0.00040024	138.766	103.77	82.6079	202.19	100.444	117.244	141.345	102.919	125.979	138.183
sp|Q9NRV9|HEBP1_HUMAN	Q9NRV9	Q9NRV9	HEBP1	Heme-binding protein 1	1					XC			414853	11	37713.9	0.438141	16524	0.000424541	0.000228139	0.000597579	0.000598307	0.000274342	0.000462371	44.9863	23.5721	58.6624	58.9657	105.723	55.1418	33.9501	31.3934	42.3198	53.6716
sp|P07384|CAN1_HUMAN	P07384	P07384	CAPN1	Calpain-1 catalytic subunit	1	M	PM						1.13318e+06	36	31477.3	0.514039	16180.6	0.000415718	0.000248802	0.000274787	0.000511532	0.000449446	0.000574768	28.1365	24.6487	30.4285	25.998	45.1911	45.2033	43.723	49.3133	50.2324	63.9715
sp|P09619|PGFRB_HUMAN	P09619	P09619	PDGFRB	Platelet-derived growth factor receptor beta	2	M	PM		CS		Nuc		1.41549e+06	43	32918.4	0.489438	16111.5	0.000413944	0.000277338	0.000522751	0.000766288	0.000373236	0.000203425	179.273	181.025	254.7	325.858	415.67	446.148	250.735	269.811	330.851	149.172
sp|P07602-3|SAP_HUMAN	P07602-3	P07602	PSAP	Isoform Sap-mu-9 of Prosaposin	1	M				XC			1.18897e+06	29	40999.1	0.390935	16028	0.000411797	0.000764541	0.000287342	0.000287635	0.000305319	0.000407158	133.758	165.34	78.4496	59.3448	275.398	55.4852	122.372	73.1273	94.5689	98.9226
sp|O00159|MYO1C_HUMAN	O00159	O00159	MYO1C	Unconventional myosin-Ic	2	M	PM						1.98887e+06	57	34892.5	0.45606	15913	0.000408844	0.00018321	0.000607253	0.000656983	0.00023204	0.000418306	234.557	118.408	329.834	374.804	576.3	378.741	241.715	166.089	217.913	303.724
sp|P29317|EPHA2_HUMAN	P29317	P29317	EPHA2	Ephrin type-A receptor 2	2	M	PM		CS				1.27702e+06	45	28378.3	0.514638	14604.5	0.000375226	0.000347551	0.000292861	0.000776105	0.000447334	8.05048e-05	86.5443	147.258	158.926	118.502	211.687	293.318	103.297	209.913	200.934	38.321
sp|Q5W0Z9|ZDH20_HUMAN	Q5W0Z9	Q5W0Z9	ZDHHC20	Probable palmitoyltransferase ZDHHC20	1	M	PM						485609	17	28565.2	0.50769	14502.3	0.000372598	0.000260507	0.000335072	0.000478742	0.000474928	0.000319118	50.8964	45.599	50.6904	56.0118	67.9214	74.7475	82.7212	92.0686	68.9193	62.7541
sp|Q8NE01|CNNM3_HUMAN	Q8NE01	Q8NE01	CNNM3	Metal transporter CNNM3	2	M	PM						967147	37	26139.1	0.532829	13927.7	0.000357835	0.000489289	0.000431092	0.000468645	0.000199795	0.000246371	158.524	160.78	131.233	135.282	82.7582	137.362	70.2922	72.7108	80.7037	90.9514
sp|P12111|CO6A3_HUMAN	P12111	P12111	COL6A3	Collagen alpha-3(VI) chain	7					XC			5.17156e+06	162	31923.2	0.435746	13910.4	0.000357392	0.000185939	0.000554898	0.000511726	0.00023481	0.000340418	540.58	335.147	875.869	955.173	1519.44	822.736	642.179	468.736	657.769	689.336
sp|Q9UHB6-4|LIMA1_HUMAN	Q9UHB6-4	Q9UHB6	LIMA1	Isoform 4 of LIM domain and actin-binding protein 1	2	M	PM						1.55171e+06	50	31034.2	0.44694	13870.4	0.000356365	0.000164877	0.000567491	0.000516024	0.000216643	0.000358314	140.503	78.0905	206.034	256.687	337.334	218.005	185.355	113.64	191.357	190.659
sp|P0C0L5|CO4B_HUMAN	P0C0L5	P0C0L5	C4B	Complement C4-B	1	M	PM			XC			2.33575e+06	80	29196.8	0.456391	13325.2	0.000342356	0.000360635	0.000280123	0.000454149	0.000332274	0.000300164	270.238	263.904	210.877	195.764	269.002	296.439	350.068	269.292	415.1	246.77
sp|A1A5C7|S22AN_HUMAN	A1A5C7	A1A5C7	SLC22A23	Solute carrier family 22 member 23	1	M	PM						766516	29	26431.6	0.504102	13324.2	0.000342331	0.000345648	0.000345086	0.000619742	0.000440169	2.03318e-05	112.327	169.02	166.967	161.152	214.116	270.317	142.513	238.381	200.282	11.1695
sp|P46531|NOTC1_HUMAN	P46531	P46531	NOTCH1	Neurogenic locus notch homolog protein 1	1	M	PM		CS	XC	Nuc		1.61097e+06	74	21769.9	0.603011	13127.5	0.000337277	0.000452772	0.000594914	0.000208151	0.000165308	0.000287518	193.693	338.152	280.584	424.317	84.028	138.665	101.845	136.733	181.944	241.241
sp|P09104|ENOG_HUMAN	P09104	P09104	ENO2	Gamma-enolase	1	M	PM			XC			532738	20	26636.9	0.472996	12599.1	0.000323702	0.000128353	0.00047443	0.000576471	0.000186316	0.000304205	50.1325	24.7417	66.6634	87.3377	127.865	99.1198	53.3331	39.7762	55.0391	65.8788
sp|Q7KYR7|BT2A1_HUMAN	Q7KYR7	Q7KYR7	BTN2A1	Butyrophilin subfamily 2 member A1	1	M	PM						574354	24	23931.4	0.513215	12282	0.000315553	0.000624608	0.000254982	0.000241817	0.000327166	0.000139044	136.856	150.871	71.3568	58.8184	39.6461	52.1006	85.1519	87.5215	34.1001	37.7317
sp|Q14114|LRP8_HUMAN	Q14114	Q14114	LRP8	Low-density lipoprotein receptor-related protein 8	2	M	PM			XC			1.34474e+06	50	26894.8	0.450905	12127	0.000311572	0.000252335	0.000365896	0.000246569	0.000427162	0.000255783	246.729	190.531	366.988	263.847	149.918	166.068	407.326	357.215	283.823	216.978
sp|P30874|SSR2_HUMAN	P30874	P30874	SSTR2	Somatostatin receptor type 2	1	M	PM						809320	8	101165	0.116271	11762.6	0.000302208	0.000200861	0.000209061	0.000445301	0.000332474	0.000328152	64.8245	9.52324	77.9984	9.46602	150.489	18.8322	103.551	17.458	156.146	17.4791
sp|Q8TCT8|SPP2A_HUMAN	Q8TCT8	Q8TCT8	SPPL2A	Signal peptide peptidase-like 2A	1	M	PM						427355	15	28490.3	0.409625	11670.3	0.000299839	0.000312864	0.000224974	0.00026996	0.000379557	0.00029702	127.095	75.5943	84.2947	51.9124	80.9627	58.1823	133.255	101.568	104.607	80.6257
sp|P43490|NAMPT_HUMAN	P43490	P43490	NAMPT	Nicotinamide phosphoribosyltransferase	1					XC			576327	28	20583.1	0.563072	11589.8	0.000297769	0.000252289	0.00024238	0.00047326	0.000290544	0.000253125	35.3616	52.89	60.0544	48.5262	60.3195	88.4979	38.3285	67.458	51.9096	59.6162
sp|P12259|FA5_HUMAN	P12259	P12259	F5	Coagulation factor V	1	M	PM			XC			2147623	87	24685.3	0.46627	11510	0.00029572	0.000309541	0.000130562	0.000508705	0.000142974	0.000405288	207.741	178.633	71.3599	71.9554	265.754	261.859	80.8495	91.3795	366.261	262.761
sp|Q9H223|EHD4_HUMAN	Q9H223	Q9H223	EHD4	EH domain-containing protein 4	1	M	PM				Nuc		643210	30	21440.3	0.534324	11456.1	0.000294334	0.000234938	0.000321923	0.000568038	0.000315463	8.56097e-05	73.5387	69.5474	83.8956	91.0091	87.1518	149.991	63.0722	103.425	77.9419	28.4712
sp|Q99623|PHB2_HUMAN	Q99623	Q99623	PHB2	Prohibitin-2	1	M			CS		Nuc		582784	22	26490.2	0.431798	11438.4	0.00029388	0.000146457	0.000465821	0.000435809	0.000159842	0.000298392	152.048	79.1365	231.383	240.375	360.201	210.049	157.748	95.654	159.696	181.137
sp|P32248|CCR7_HUMAN	P32248	P32248	CCR7	C-C chemokine receptor type 7	1	M	PM		CS				448135	13	34471.9	0.328809	11334.7	0.000291215	0.000253115	0.000215842	0.000331169	0.00031691	0.000332148	137.246	65.0343	117.716	52.9622	177.19	75.8985	149.296	90.1797	194.138	95.8764
sp|P78324|SHPS1_HUMAN	P78324	P78324	SIRPA	Tyrosine-protein phosphatase non-receptor type substrate 1	1	M	PM						640283	25	25611.3	0.438155	11221.7	0.000288313	0.000277348	0.000258042	0.000369102	0.000242034	0.000305284	43.3145	30.6951	31.876	27.2733	34.3015	36.4374	49.0208	29.6665	49.2579	37.9579
sp|Q00341|VIGLN_HUMAN	Q00341	Q00341	HDLBP	Vigilin	2	M	PM				Nuc		1.64931e+06	66	24989.5	0.441062	11021.9	0.000283179	0.000123831	0.000456892	0.000374604	0.000157653	0.000328506	220.235	115.465	337.381	406.854	666.247	311.566	248.455	162.806	226.844	344.127
sp|P15121|ALDR_HUMAN	P15121	P15121	AKR1B1	Aldose reductase	1					XC			397283	17	23369.6	0.466205	10895	0.000279919	0.000146646	0.000405413	0.000511096	0.000163392	0.000223197	121.709	73.6625	174.864	194.482	292.5	229.002	112.822	90.8982	115.621	125.957
sp|Q9UPN3|MACF1_HUMAN	Q9UPN3	Q9UPN3	MACF1	Microtubule-actin cross-linking factor 1, isoforms 1/2/3/5	2	M	PM						7.92966e+06	421	18835.3	0.572146	10776.5	0.000276875	0.000274903	0.000199641	0.000236056	0.00024886	0.00040431	488.535	559.259	384.517	387.872	367.284	428.358	439.75	560.707	458.837	924.065
sp|O00468|AGRIN_HUMAN	O00468	O00468	AGRN	Agrin	2	M	PM		CS	XC			2.22417e+06	83	26797.2	0.398561	10680.3	0.000274403	0.000270451	0.000267242	0.000301083	0.000265058	0.000272037	99.7057	73.5323	117.325	69.3903	102.612	73.0187	142.359	79.8137	109.692	83.0945
sp|P13611|CSPG2_HUMAN	P13611	P13611	VCAN	Versican core protein	2	M				XC			1.63949e+06	118	13893.9	0.738224	10256.8	0.000263523	0.00038582	0.000367195	0.000329308	9.92736e-05	0.000176225	77.6602	292.066	98.6914	265.459	74.6542	222.36	64.4961	83.2295	43.705	149.871
sp|P98155|VLDLR_HUMAN	P98155	P98155	VLDLR	Very low-density lipoprotein receptor	2	M	PM		CS		Nuc		720219	45	16004.9	0.635866	10177	0.00026147	0.00015336	0.000166577	0.000232101	0.000315899	0.000408029	54.3319	55.7541	34.0161	57.8345	35.7377	75.2663	64.3664	127.192	87.9697	166.653
sp|Q92508|PIEZ1_HUMAN	Q92508	Q92508	PIEZO1	Piezo-type mechanosensitive ion channel component 1	2	M	PM						2.04487e+06	97	21081.1	0.477065	10057.1	0.00025839	0.000390523	0.000272582	0.000245339	0.000230621	0.00016645	186.361	233.693	195.016	155.776	158.724	130.955	151.325	152.843	169.236	111.902
sp|P27816|MAP4_HUMAN	P27816	P27816	MAP4	Microtubule-associated protein 4	1	M	PM						1.20202e+06	59	20373.3	0.480318	9785.67	0.000251417	0.000114025	0.000354631	0.000439109	0.00015745	0.000229587	72.0104	41.7547	95.6559	124.018	185.475	143.429	85.6958	63.855	66.984	94.4511
sp|P22694-2|KAPCB_HUMAN	P22694-2	P22694	PRKACB	Isoform 2 of cAMP-dependent protein kinase catalytic subunit beta	1	M	PM						404376	20	20218.8	0.470587	9514.7	0.000244456	9.81054e-05	0.000399735	0.000464115	0.000122022	0.000189019	36.4904	15.1688	37.1382	59.0251	74.563	64.0094	46.5633	20.8951	21.1705	32.8338
sp|Q6PI73|LIRA6_HUMAN	Q6PI73	Q6PI73	LILRA6	Leukocyte immunoglobulin-like receptor subfamily A member 6	1	M						ShG	427227	17	25131	0.362541	9111.01	0.000234084	0.000166837	0.000257784	0.000214617	0.000298495	0.000225753	74.7796	33.6061	135.004	49.5891	55.7952	38.561	86.1518	66.5902	69.2683	51.0875
sp|O75131|CPNE3_HUMAN	O75131	O75131	CPNE3	Copine-3	1	M	PM				Nuc		491482	26	18903.1	0.480377	9080.62	0.000233303	0.00021032	0.000200195	0.000216682	0.000282957	0.000246151	62.5431	57.8021	61.2575	52.544	69.4798	53.1185	90.3474	86.1257	68.5646	76.0011
sp|P23458|JAK1_HUMAN	P23458	P23458	JAK1	Tyrosine-protein kinase JAK1	1	M	PM				Nuc		1.30124e+06	63	20654.6	0.430836	8898.75	0.00022863	0.000117262	0.000185444	0.000277809	0.000216149	0.000337729	71.7112	70.4865	132.086	106.455	213.146	148.953	170.152	143.896	334.827	228.071
sp|P49368|TCPG_HUMAN	P49368	P49368	CCT3	T-complex protein 1 subunit gamma	1	M	PM						610358	31	19689	0.441975	8702.04	0.000223576	0.000174013	0.000248851	0.000372624	0.000189278	0.000161681	236.22	171.501	251.563	234.222	308.767	327.577	297.309	206.601	318.855	179.019
sp|Q9C0C4|SEM4C_HUMAN	Q9C0C4	Q9C0C4	SEMA4C	Semaphorin-4C	1	M				XC			571045	43	13280.1	0.641729	8522.23	0.000218957	9.94138e-05	0.000105643	0.000192681	0.00025423	0.000407776	35.5305	41.0008	35.1462	41.6094	27.6951	70.883	56.9042	116.124	100.732	188.939
sp|Q13418|ILK_HUMAN	Q13418	Q13418	ILK	Integrin-linked protein kinase	1	M	PM			XC			460094	24	19170.6	0.425704	8161	0.000209676	0.000131538	0.00037095	0.000297026	0.000117054	0.000164088	65.7353	39.8806	76.9924	107.406	170.577	80.3271	56.283	39.3045	65.8983	55.8909
sp|P05067|A4_HUMAN	P05067	P05067	APP	Amyloid beta A4 protein	1	M	PM		CS	XC			644305	35	18408.7	0.440772	8114.05	0.000208469	7.22691e-05	0.000366323	0.000285999	9.01307e-05	0.000250621	93.2721	43.8556	136.435	212.296	385.544	154.808	101.291	60.5749	98.4949	170.862
sp|P05121|PAI1_HUMAN	P05121	P05121	SERPINE1	Plasminogen activator inhibitor 1	1	M	PM			XC			391541	19	20607.4	0.378356	7796.94	0.000200322	0.000151508	0.000495941	0.00023236	6.40528e-05	0.000101376	24.4508	29.8974	89.9187	93.4614	169.999	40.8995	39.1606	13.9985	6.27478	22.4743
sp|Q13308-6|PTK7_HUMAN	Q13308-6	Q13308	PTK7	Isoform 6 of Inactive tyrosine-protein kinase 7	1	M	PM						808206	54	14966.8	0.515674	7717.99	0.000198294	0.000188764	0.000122975	0.000382746	0.000324436	0	18.6687	39.7173	44.9399	24.7105	53.8512	71.834	28.3308	75.6027	53.1943	0
sp|P48060|GLIP1_HUMAN	P48060	P48060	GLIPR1	Glioma pathogenesis-related protein 1	1	M	PM			XC			115488	10	11548.8	0.620429	7165.23	0.000184092	0.000170222	0.00016117	0.000197455	0.000195551	0.000194017	22.0161	38.5846	15.4906	34.8888	26.9199	39.923	32.6265	49.0915	32.582	49.4074
sp|Q9NZM1|MYOF_HUMAN	Q9NZM1	Q9NZM1	MYOF	Myoferlin	1	M	PM						1.70533e+06	121	14093.6	0.501938	7074.11	0.000181751	5.78985e-05	0.000243574	0.000346881	0.00010335	0.000185621	38.25	16.3885	48.2999	65.8426	82.8537	87.581	42.8912	32.3987	46.9263	59.0274
sp|O95466-3|FMNL1_HUMAN	O95466-3	O95466	FMNL1	Isoform 3 of Formin-like protein 1	1	M	PM						844699	58	14563.8	0.483886	7047.22	0.00018106	0.000115757	0.000183158	0.000195443	0.000165773	0.000241054	43.699	40.6396	64.7236	61.4089	75.7427	61.2039	57.6693	64.4558	102.447	95.076
sp|P12110|CO6A2_HUMAN	P12110	P12110	COL6A2	Collagen alpha-2(VI) chain	1					XC			755500	48	15739.6	0.446279	7024.25	0.00018047	9.42445e-05	0.000278634	0.000261919	0.000104751	0.00018375	95.8476	50.7015	99.1956	143.154	224.845	125.687	93.6687	62.4127	98.1494	111.057
sp|P41240|CSK_HUMAN	P41240	P41240	CSK	Tyrosine-protein kinase CSK	1	M	PM						362008	27	13407.7	0.514145	6893.49	0.00017711	0.00017129	0.000170609	0.000240995	0.000195483	0.000118984	80.9021	69.7383	78.7023	66.3353	42.1161	87.5194	62.6311	88.1444	81.662	54.423
sp|Q14195-2|DPYL3_HUMAN	Q14195-2	Q14195	DPYSL3	Isoform LCRMP-4 of Dihydropyrimidinase-related protein 3	1					XC			553446	36	15373.5	0.43833	6738.67	0.000173133	0.000109835	0.000283052	0.0002355	9.71449e-05	0.000161428	63.7344	46.5652	105.727	114.602	181.546	89.057	59.5039	45.6128	67.0919	76.8872
sp|P00533|EGFR_HUMAN	P00533	P00533	EGFR	Epidermal growth factor receptor	1	M	PM		CS	XC	Nuc		887779	59	15047.1	0.439282	6609.92	0.000169825	0.000172754	9.80066e-05	0.00035999	0.000248218	0	72.2692	103.755	138.657	56.2135	162.621	192.854	82.5964	165.106	204.962	0
sp|P08473|NEP_HUMAN	P08473	P08473	MME	Neprilysin	1	M	PM						504381	39	12932.8	0.505421	6536.53	0.000167939	0.000101908	0.000103492	0.000328464	0.000304204	1.97158e-05	35.6654	48.0445	69.6514	46.5957	97.016	138.128	63.4211	158.836	127.668	10.4425
sp|P16615|AT2A2_HUMAN	P16615	P16615	ATP2A2	Sarcoplasmic/endoplasmic reticulum calcium ATPase 2	1	M	PM						581216	46	12635.1	0.509778	6441.11	0.000165487	6.27872e-05	0.000226389	0.000336257	6.91359e-05	0.000164531	71.7323	41.8317	90.3207	144.044	212.91	199.832	77.4722	51.0137	85.9602	123.151
sp|O94804|STK10_HUMAN	O94804	O94804	STK10	Serine/threonine-protein kinase 10	2	M	PM						628612	45	13969.1	0.450005	6286.18	0.000161507	6.21936e-05	0.000137604	0.000258075	0.000116365	0.000238056	42.912	21.9701	49.4551	46.4221	86.8069	81.3189	60.5381	45.526	114.375	94.4759
sp|O75054|IGSF3_HUMAN	O75054	O75054	IGSF3	Immunoglobulin superfamily member 3	1	M			CS				687637	55	12502.5	0.488103	6102.5	0.000156788	0.000142599	0.000120352	0.000137784	0.000217343	0.000155783	54.454	62.9888	79.4651	50.7697	65.3611	54.2878	93.2552	106.326	76.287	77.3071
sp|Q92598-4|HS105_HUMAN	Q92598-4	Q92598	HSPH1	Isoform 4 of Heat shock protein 105 kDa	1					XC			584362	47	12433.2	0.457868	5692.78	0.000146261	6.6354e-05	0.000206444	0.000224321	8.33845e-05	0.000166235	233.723	121.718	348.103	361.656	582.085	367.043	221.28	169.403	227.944	342.582
sp|P63010-2|AP2B1_HUMAN	P63010-2	P63010	AP2B1	Isoform 2 of AP-2 complex subunit beta	1	M	PM						486075	42	11573.2	0.455934	5276.62	0.000135569	7.16574e-05	0.000178395	0.000219084	7.49282e-05	0.000149526	86.9248	56.1393	150.418	133.473	217.02	153.1	108.681	65.0128	80.5401	131.606
sp|P11532|DMD_HUMAN	P11532	P11532	DMD	Dystrophin	1	M	PM		CS		Nuc		2.00438e+06	196	10226.4	0.509831	5213.74	0.000133953	0.000121962	0.00015232	0.000112645	0.000155636	0.000124558	209.335	172.971	178.452	206.305	148.539	142.502	171.324	244.46	219.844	198.461
sp|P08069|IGF1R_HUMAN	P08069	P08069	IGF1R	Insulin-like growth factor 1 receptor	1	M	PM						629906	64	9842.27	0.475815	4683.1	0.00012032	0.000116655	0.000112443	0.000210526	0.000151597	2.78256e-05	96.5006	136.202	166.502	125.376	188.03	219.252	141.611	196.027	193.23	36.4988
sp|P53621-2|COPA_HUMAN	P53621-2	P53621	COPA	Isoform 2 of Coatomer subunit alpha	1	M				XC			695246	69	10076	0.444824	4482.06	0.000115155	5.44745e-05	0.0001762	0.00016351	6.42256e-05	0.000129089	141.818	77.0287	213.232	237.942	365.465	206.235	162.727	100.581	148.743	205.07
sp|P21980|TGM2_HUMAN	P21980	P21980	TGM2	Protein-glutamine gamma-glutamyltransferase 2	1	M	PM						290988	32	9093.39	0.451586	4106.45	0.000105504	5.27317e-05	0.000175962	0.000201728	4.90266e-05	7.18622e-05	116.434	64.2802	141.14	204.848	337.182	219.347	106.486	66.1889	91.8685	98.415
sp|Q06481|APLP2_HUMAN	Q06481	Q06481	APLP2	Amyloid-like protein 2	1	M	PM				Nuc		298442	35	8526.93	0.453555	3867.43	9.93636e-05	3.71601e-05	0.000173278	0.000183062	3.06411e-05	9.31931e-05	81.3198	33.4746	109.585	149.069	214.766	147.094	68.3509	30.5697	73.5866	94.3142
sp|Q92673|SORL_HUMAN	Q92673	Q92673	SORL1	Sortilin-related receptor	1	M	PM			XC			772103	121	6381.02	0.579967	3700.78	9.5082e-05	0.000107773	6.91238e-05	0.000111526	5.22341e-05	0.000135036	61.9616	75.7359	30.132	46.3901	60.5535	69.9079	45.7524	40.6532	47.3309	106.61
sp|P49327|FAS_HUMAN	P49327	P49327	FASN	Fatty acid synthase	2	M	PM						990718	121	8187.75	0.383919	3143.44	8.07624e-05	4.37289e-05	0.000146183	0.0001172	3.9828e-05	6.9538e-05	135.738	75.2371	212.179	240.195	427.094	179.867	159.393	75.8925	197.889	134.413
sp|Q8WX93|PALLD_HUMAN	Q8WX93	Q8WX93	PALLD	Palladin	1	M	PM				Nuc		416373	63	6609.1	0.440292	2909.94	7.47632e-05	3.94615e-05	0.000145677	9.71544e-05	5.34557e-05	4.91323e-05	32.4231	16.9124	41.8646	59.6248	75.7073	37.1409	26.1298	25.3731	30.7122	23.6567
sp|O75581|LRP6_HUMAN	O75581	O75581	LRP6	Low-density lipoprotein receptor-related protein 6	1	M	PM		CS	XC			381529	74	5155.8	0.486898	2510.35	6.44969e-05	5.47602e-05	5.21939e-05	0.00012189	9.2544e-05	1.04046e-05	28.9019	39.3736	48.9269	35.8397	54.7199	78.1746	35.415	73.6946	80.1965	8.40464
sp|P53396|ACLY_HUMAN	P53396	P53396	ACLY	ATP-citrate synthase	1	M	PM						248299	57	4356.13	0.462676	2015.48	5.17824e-05	2.34615e-05	7.71375e-05	8.31649e-05	2.50336e-05	5.68905e-05	31.0836	17.1279	43.9295	53.7798	80.3129	54.156	36.4863	20.2405	31.1228	46.6598
sp|Q9HAR2|AGRL3_HUMAN	Q9HAR2	Q9HAR2	ADGRL3	Adhesion G protein-coupled receptor L3	1	M	PM						226813	67	3385.27	0.517277	1751.12	4.49906e-05	3.80748e-05	4.96691e-05	8.45557e-05	5.9643e-05	1.3115e-06	24.5053	43.4687	56.5402	54.1539	53.355	86.1074	43.8779	75.4131	65.1237	1.68214
sp|O75369-8|FLNB_HUMAN	O75369-8	O75369	FLNB	Isoform 8 of Filamin-B	1	M	PM						385001	136	2830.89	0.482237	1365.16	3.50742e-05	1.49188e-05	5.37807e-05	5.32354e-05	2.05081e-05	3.70533e-05	126.498	70.0347	200.497	241.107	313.668	222.914	139.358	106.623	117.669	195.416
sp|O15018|PDZD2_HUMAN	O15018	O15018	PDZD2	PDZ domain-containing protein 2	1					XC	Nuc		310176	136	2280.7	0.46942	1070.61	2.75065e-05	4.47574e-05	2.38328e-05	1.93285e-05	2.76636e-05	2.16122e-05	51.5509	59.7336	55.1252	30.3762	25.7004	23.0096	51.3861	40.8893	26.9381	32.4046

## Sheet: S3B - CD4 T cells
Protein Id	Uniprot-L	Uniprot-S	Gene Symbol	Description	CD4+ T Cell Peptides	M	PM	IPM	CS	XC	Nuc	ShG	Sum of peptides max precursor intensities (MPI)	Theroetical number of tryptic peptides	iBAQ (MPI / number of tryptic peptides)	Scaling factor (unstimulated S:N / total S:N)	iBAQ * scaling factor for unstimulated samples	% of cell surface (PM annotated proteins only, across all donors)	% of cell surface in Donor 6 CD4+ T cells	% of cell surface in Donor 7 CD4+ T cells	% of cell surface in Donor 8 CD4+ T cells	% of cell surface in Donor 9 CD4+ T cells	% of cell surface in Donor 10 CD4+ T cells	Donor 6 CD4+ T cells stimulated with IFNa2a S:N	Donor 6 CD4+ T cells unstimulated S:N	Donor 7 CD4+ T cells stimulated with IFNa2a S:N	Donor 7 CD4+ T cells unstimulated S:N	Donor 8 CD4+ T cells stimulated with IFNa2a S:N	Donor 8 CD4+ T cells unstimulated S:N	Donor 9 CD4+ T cells stimulated with IFNa2a S:N	Donor 9 CD4+ T cells unstimulated S:N	Donor 10 CD4+ T cells stimulated with IFNa2a S:N	Donor 10 CD4+ T cells unstimulated S:N
sp|P16150|LEUK_HUMAN	P16150	P16150	SPN	Leukosialin	37	M	PM		CS	XC			5.39872e+09	13	4.15286e+08	0.478962	1.98906e+08	12.2683	7.89007	15.4502	10.9047	16.1284	14.0691	3131.37	3221.76	6448.51	4992.55	3287.79	3423.62	3085.59	3287.95	3690.01	3131.12
sp|P68032|ACTC_HUMAN	P68032	P68032	ACTC1	Actin, alpha cardiac muscle 1	70	M				XC			4.07861e+09	20	2.0393e+08	0.50595	1.03179e+08	6.36394	2.70327	9.12242	10.738	5.73421	3.48144	8797.99	6429.23	17164.1	17169.5	15440.1	19636	6691.92	6808.73	5178.91	4512.84
sp|P08575|PTPRC_HUMAN	P08575	P08575	PTPRC	Receptor-type tyrosine-protein phosphatase C	190	M	PM		CS				1.15638e+10	58	1.99376e+08	0.501411	9.99695e+07	6.166	2.6692	9.11166	5.17525	7.85832	8.15224	9896.28	15007.8	51386.6	40542.4	17537.6	22373	20744.2	22059.1	24696.9	24982.4
sp|P16070|CD44_HUMAN	P16070	P16070	CD44	CD44 antigen	48	M	PM		CS				4.04578e+09	27	1.49844e+08	0.52297	7.83638e+07	4.83338	5.70822	5.66539	4.12144	3.85651	3.9194	10414.8	14049.8	11326.3	11035.1	7223.3	7799.69	4423.56	4739.01	5726.64	5257.88
sp|P07225|PROS_HUMAN	P07225	P07225	PROS1	Vitamin K-dependent protein S	6	M	PM			XC			4.51895e+09	30	1.50632e+08	0.497059	7.48729e+07	4.61807	5.65468	2.81266	6.39675	3.21278	4.11559	734.867	663.863	263.82	261.316	649.325	577.416	173.7	188.311	155.66	263.345
sp|P04921|GLPC_HUMAN	P04921	P04921	GYPC	Glycophorin-C	7	M	PM						2.37457e+08	2	1.18729e+08	0.607616	7.21414e+07	4.4496	12.0975	1.5672	0.799793	1.86038	2.1232	1105.3	2106.8	256.755	215.987	89.7956	107.093	142.761	161.753	209.145	201.53
sp|P02656|APOC3_HUMAN	P02656	P02656	APOC3	Apolipoprotein C-III	11					XC			8.56453e+08	6	1.42742e+08	0.491159	7.01091e+07	4.32424	6.4047	1.91881	6.17251	2.24811	3.29411	3827.22	2933.44	526.495	695.484	1933.09	2173.69	574.958	514.066	534.254	822.315
sp|P35542|SAA4_HUMAN	P35542	P35542	SAA4	Serum amyloid A-4 protein	16					XC			6.74167e+08	7	9.63096e+07	0.525315	5.05929e+07	3.12051	4.81534	1.538	3.04593	2.60142	2.88936	4690.43	4966.39	1170.74	1255.3	2517.53	2415.42	1240.49	1339.52	863.528	1624.2
sp|Q08722|CD47_HUMAN	Q08722	Q08722	CD47	Leukocyte surface antigen CD47	21	M	PM						792726024	10	7.92726e+07	0.500368	3.96654e+07	2.44652	2.47977	2.86985	1.68165	2.44047	2.85539	2266.63	2804.46	2946.64	2568.47	1438.86	1462.28	1450.31	1377.95	1856.13	1760.05
sp|P10909-2|CLUS_HUMAN	P10909-2	P10909	CLU	Isoform 2 of Clusterin	44	M			CS	XC	Nuc		1.46034e+09	22	6.63789e+07	0.500286	3.32084e+07	2.04826	3.19616	0.873039	2.34476	1.3287	1.88934	13977.5	11620.9	2520.12	2512.02	5840.49	6554.92	2341.91	2411.91	2133.21	3744.08
sp|P14151-2|LYAM1_HUMAN	P14151-2	P14151	SELL	Isoform 2 of L-selectin	19	M	PM						7.60981e+08	11	6.91801e+07	0.468274	3.23952e+07	1.9981	2.02553	3.16383	1.34126	1.64336	1.50669	1510.24	2109.56	3216.69	2607.62	1374.78	1074.05	1082.8	854.494	1332.88	855.264
sp|P01876|IGHA1_HUMAN	P01876	P01876	IGHA1	Ig alpha-1 chain C region	29	M	PM			XC			841492225	15	5.60995e+07	0.514776	2.88787e+07	1.7812	2.32236	1.08942	2.50986	1.09136	1.39673	7697.83	6682.9	1993.9	2480.91	4699.8	5553.22	1585.93	1567.94	1437.49	2190.64
sp|P32942|ICAM3_HUMAN	P32942	P32942	ICAM3	Intercellular adhesion molecule 3	38	M	PM						1.27974e+09	25	5.11896e+07	0.537563	2.75176e+07	1.69725	2.44009	2.39841	1.306	0.783366	0.705359	5906.02	9222.25	7096.85	7173.48	3514.99	3795.18	1597.42	1478.15	1775.36	1452.99
sp|P04234|CD3D_HUMAN	P04234	P04234	CD3D	T-cell surface glycoprotein CD3 delta chain	16	M	PM						4.01338e+08	8	5.01672e+07	0.506992	2.54344e+07	1.56876	1.15144	1.91348	1.01492	1.66781	2.52451	1013.22	1325.88	1817.84	1743.67	870.134	898.576	907.027	958.81	1723.5	1584.39
sp|P02655|APOC2_HUMAN	P02655	P02655	APOC2	Apolipoprotein C-II	10					XC			189408002	4	4.7352e+07	0.510331	2.41652e+07	1.49048	1.86852	0.698695	2.16005	1.14655	1.31699	1930.38	1610.16	492.785	476.469	1156.29	1431.17	543.17	493.273	319.557	618.548
sp|P14209|CD99_HUMAN	P14209	P14209	CD99	CD99 antigen	6	M	PM						1.73154e+08	4	4.32884e+07	0.497596	2.15401e+07	1.32857	0.820987	1.17128	0.866372	2.10895	2.42541	351.987	485.172	612.17	547.77	352.982	393.661	653.018	622.228	887.231	781.208
sp|Q9Y3P8|SIT1_HUMAN	Q9Y3P8	Q9Y3P8	SIT1	Signaling threshold-regulating transmembrane adapter 1	13	M	PM						3.91873e+08	10	3.91873e+07	0.504083	1.97537e+07	1.21838	0.49038	1.28785	0.694241	2.04327	2.43703	809.535	1005.87	2029.85	2090.51	982.927	1094.91	1806.01	2092.47	3234.06	2724.54
sp|P06127|CD5_HUMAN	P06127	P06127	CD5	T-cell surface glycoprotein CD5	39	M	PM						8.92289e+08	24	3.71787e+07	0.53112	1.97464e+07	1.21793	1.2385	1.07756	0.772511	1.56409	1.69529	3839.38	6244.68	4408.41	4299.66	2471.68	2994.87	3630.48	3937.31	5191.46	4658.87
sp|P01871-2|IGHM_HUMAN	P01871-2	P01871	IGHM	Isoform 2 of Ig mu chain C region	43	M	PM		CS	XC			8.77782e+08	24	3.65742e+07	0.519596	1.90038e+07	1.17213	1.33549	0.79856	1.53727	1.02024	1.03886	10003.9	10295.6	4086.87	4871.87	9245.45	9112.12	3821.37	3926.79	2957.09	4365.06
sp|P68431|H31_HUMAN	P68431	P68431	HIST1H3A	Histone H3.1	12	M				XC	Nuc		1.69944e+08	4	4.2486e+07	0.419936	1.78414e+07	1.10044	0.7497	0.997282	1.2781	1.68557	1.1071	1611.73	1044.02	896.091	1099.05	1625.78	1368.5	2699.6	1171.91	796.902	840.295
sp|P32121-4|ARRB2_HUMAN	P32121-4	P32121	ARRB2	Isoform 4 of Beta-arrestin-2	2	M	PM				Nuc		694196701	20	3.47098e+07	0.4947	1.71709e+07	1.05908	0.214195	1.63895	0.965365	1.53239	1.46595	38.4812	36.6321	247.021	221.817	116.281	126.941	109.837	130.841	155.246	136.645
sp|Q8N131|PORIM_HUMAN	Q8N131	Q8N131	TMEM123	Porimin	1	M	PM						91428856	2	45714428	0.369821	1.69062e+07	1.04275	1.67562	0.51635	0.354862	1.50412	1.1937	508.782	446.902	198.284	108.983	199.053	72.7704	372.498	200.283	429.585	173.522
sp|P63000-2|RAC1_HUMAN	P63000-2	P63000	RAC1	Isoform B of Ras-related C3 botulinum toxin substrate 1	13	M	PM						2.23423e+08	8	2.79278e+07	0.490291	1.36928e+07	0.844553	0.20082	1.67357	0.904772	0.835286	0.745483	213.15	299.669	2195.96	1976.31	905.834	1038.08	683.301	622.29	724.323	606.308
sp|P00738|HPT_HUMAN	P00738	P00738	HP	Haptoglobin	26					XC			4.82235e+08	20	2.41117e+07	0.524142	1.2638e+07	0.779496	1.09943	0.46811	0.684779	0.739038	0.815289	4393.16	4926.18	1383.98	1659.85	2161.1	2359.12	1606.47	1653.23	1884.94	1991.02
sp|P02647|APOA1_HUMAN	P02647	P02647	APOA1	Apolipoprotein A-I	42	M	PM		CS	XC	Nuc		4.2772e+08	18	2.37622e+07	0.528675	1.25625e+07	0.774838	0.949272	0.572475	0.820362	0.727942	0.727356	8575.04	10351.1	4390.52	4940.02	6216.34	6877.95	4087.4	3962.92	3881.81	4322.79			z
sp|Q14242-2|SELPL_HUMAN	Q14242-2	Q14242	SELPLG	Isoform 2 of P-selectin glycoprotein ligand 1	9	M	PM						2.27323e+08	10	2.27323e+07	0.517854	1.1772e+07	0.726084	0.361958	1.02319	0.654578	0.825397	0.972673	1117.25	1484.46	3527.2	3320.82	1640.12	2064.09	1743.39	1690.04	1965.52	2174.2
sp|P20701-2|ITAL_HUMAN	P20701-2	P20701	ITGAL	Isoform 2 of Integrin alpha-L	41	M	PM		CS				9.38216e+08	41	2.28833e+07	0.49167	1.12511e+07	0.693951	0.344031	0.959131	0.539219	0.931801	0.951346	1943.71	2444.39	6599.48	5392.97	2598.03	2945.75	3033.44	3305.36	4200.11	3684.11
sp|P08697|A2AP_HUMAN	P08697	P08697	SERPINF2	Alpha-2-antiplasmin	9				CS	XC			3.52422e+08	18	1.9579e+07	0.538022	1.05339e+07	0.649721	0.741888	0.318061	0.752735	0.609746	0.853468	1494.45	1492.1	481.843	506.229	1092.53	1164.02	508.68	612.255	466.929	935.554
sp|P02652|APOA2_HUMAN	P02652	P02652	APOA2	Apolipoprotein A-II	13					XC			1.00936e+08	5	2.01873e+07	0.514474	1.03858e+07	0.640586	0.687508	0.369413	0.820589	0.601821	0.729805	1382.47	1130.86	464.806	480.862	903.403	1037.8	452.196	494.221	381.436	654.273
sp|P60709|ACTB_HUMAN	P60709	P60709	ACTB	Actin, cytoplasmic 1	15	M	PM			XC			3.74819e+08	20	1.8741e+07	0.531055	9.95247e+06	0.613856	0.324589	0.745871	0.897962	0.769961	0.409129	1162.18	953.768	1646.67	1734.4	1212.01	2028.73	861.71	1129.54	858.693	655.225
sp|P01009|A1AT_HUMAN	P01009	P01009	SERPINA1	Alpha-1-antitrypsin	20	M				XC			4.53063e+08	23	1.96984e+07	0.503214	9.91251e+06	0.611391	0.82122	0.292449	0.694936	0.596022	0.585723	5518	4948.86	1471.72	1394.68	3358.34	3219.95	1406.39	1793.21	1356.4	1923.8
sp|P05090|APOD_HUMAN	P05090	P05090	APOD	Apolipoprotein D	15					XC			1.70977e+08	9	1.89975e+07	0.520609	9.89027e+06	0.61002	1.05568	0.466321	0.617526	0.259277	0.311688	3367.31	3462.15	927.618	1210.25	1453.84	1557.14	454.658	424.524	436.836	557.13
sp|P02765|FETUA_HUMAN	P02765	P02765	AHSG	Alpha-2-HS-glycoprotein	10					XC			238020578	13	1.83093e+07	0.527772	9.66313e+06	0.59601	1.13741	0.277051	0.804843	0.0996228	0.225891	4449.72	4912.76	1423.11	946.995	1971.49	2672.88	269.415	214.829	188.936	531.778
sp|P05556|ITB1_HUMAN	P05556	P05556	ITGB1	Integrin beta-1	37	M	PM		CS				5.90874e+08	33	1.79053e+07	0.501181	8.9738e+06	0.553493	0.348262	0.670546	0.443826	0.841815	0.650687	2697.16	3351.05	5377.63	5106.01	3218.99	3283.57	3687.94	4044.04	4124.91	3412.47
sp|O95445|APOM_HUMAN	O95445	O95445	APOM	Apolipoprotein M	7	M	PM			XC			1.48053e+08	10	1.48053e+07	0.560528	8.29878e+06	0.511859	0.649179	0.254813	0.357167	0.749804	0.633394	830.073	1171.68	285.619	363.951	393.057	495.648	609.962	675.64	492.109	623.075
sp|P27169|PON1_HUMAN	P27169	P27169	PON1	Serum paraoxonase/arylesterase 1	11	M				XC			2.28508e+08	15	1.52338e+07	0.535924	8.16418e+06	0.503557	0.713676	0.390146	0.468117	0.385791	0.440579	2324.72	2799.92	859.918	1211.29	1460.53	1412.07	718.297	755.649	802.871	942.084
sp|P02649|APOE_HUMAN	P02649	P02649	APOE	Apolipoprotein E	27	M	PM			XC	Nuc		326528444	22	14842202	0.541637	8.03908e+06	0.495841	0.769786	0.203639	0.496121	0.489501	0.422896	3793.03	4707.09	985.236	985.418	2481.86	2332.53	1103.17	1494.38	885.292	1409.41
sp|P09693|CD3G_HUMAN	P09693	P09693	CD3G	T-cell surface glycoprotein CD3 gamma chain	9	M	PM						1.09068e+08	7	1.55811e+07	0.506036	7.8846e+06	0.486313	0.34875	0.653412	0.446557	0.417576	0.615134	812.21	970.731	1491.88	1439.29	915.172	955.696	532.729	580.288	1010.82	933.204
sp|P06729|CD2_HUMAN	P06729	P06729	CD2	T-cell surface antigen CD2	22	M	PM		CS	XC			2.13581e+08	14	1.52558e+07	0.509486	7.77261e+06	0.479405	0.272694	0.499173	0.332549	0.613132	0.914644	1179.4	2300.36	4363.43	3332.34	1986.23	2156.92	2966.53	2582.25	3538.76	4205.28
sp|Q5VTE0|EF1A3_HUMAN	Q5VTE0	Q5VTE0	EEF1A1P5	Putative elongation factor 1-alpha-like 3	24					XC	Nuc		2.99073e+08	19	1.57407e+07	0.492532	7.75281e+06	0.478184	0.193736	0.859955	0.712355	0.309707	0.269737	1740.92	1618.06	5576.7	5683.78	5172.39	4574.45	985.924	1291.39	1356.14	1227.85
sp|P07355-2|ANXA2_HUMAN	P07355-2	P07355	ANXA2	Isoform 2 of Annexin A2	29	M	PM		CS	XC	Nuc		3.3455e+08	23	1.45456e+07	0.507331	7.37946e+06	0.455156	0.309712	0.409409	0.636558	0.636117	0.366767	4675.98	3332.52	3226.68	3486.18	4508.93	5266.36	2333.86	3417.24	2397.57	2150.93
sp|P04004|VTNC_HUMAN	P04004	P04004	VTN	Vitronectin	14					XC			2.72418e+08	19	1.43378e+07	0.507402	7.27503e+06	0.448715	0.533691	0.241233	0.526843	0.427211	0.503545	3868.94	3046.92	990.469	1089.89	2048.51	2312.65	1046.69	1217.69	1009.99	1566.86
sp|P19256|LFA3_HUMAN	P19256	P19256	CD58	Lymphocyte function-associated antigen 3	2	M	PM		CS				92139291	7	1.31628e+07	0.526333	6.92799e+06	0.42731	0.635646	0.393172	0.393512	0.271339	0.285183	85.6269	113.349	55.6226	55.4834	49.119	53.9535	25.3714	24.1568	31.437	27.7172
sp|P35613|BASI_HUMAN	P35613	P35613	BSG	Basigin	13	M	PM						2.00413e+08	15	1.33609e+07	0.517847	6.91889e+06	0.426749	0.411723	0.495542	0.325817	0.493594	0.435586	877.145	1342.4	1392.99	1278.6	757.049	816.787	767.533	803.47	874.898	774.056
sp|P15529-2|MCP_HUMAN	P15529-2	P15529	CD46	Isoform B of Membrane cofactor protein	18	M	PM		CS				1.62929e+08	13	1.2533e+07	0.523824	6.56509e+06	0.404927	0.403077	0.562427	0.430174	0.289158	0.250066	1954.48	2467.13	2550.99	2724.25	1815.94	2024.44	798.935	883.615	1000.7	834.22
sp|P54709|AT1B3_HUMAN	P54709	P54709	ATP1B3	Sodium/potassium-transporting ATPase subunit beta-3	9	M	PM						1.47934e+08	12	1.23278e+07	0.51618	6.36338e+06	0.392486	0.3479	0.542461	0.329322	0.35135	0.383316	775.959	1098.09	1457.38	1354.97	759.44	799.217	498.759	553.667	693.903	659.423
sp|Q96DU3|SLAF6_HUMAN	Q96DU3	Q96DU3	SLAMF6	SLAM family member 6	11	M	PM						2.01021e+08	16	1.25638e+07	0.500072	6.28282e+06	0.387517	0.309769	0.544855	0.285286	0.412542	0.423011	1138.78	1537	2209.44	2139.41	1158.07	1088.36	983.792	1021.94	1438.58	1143.95
sp|P09382|LEG1_HUMAN	P09382	P09382	LGALS1	Galectin-1	8				CS	XC	Nuc		1.10046e+08	9	1.22273e+07	0.508956	6.22317e+06	0.383838	0.320674	0.348338	0.490205	0.54723	0.25155	1070.64	805.726	588.947	692.631	891.106	947.02	396.478	686.463	406.808	344.484
sp|P04003|C4BPA_HUMAN	P04003	P04003	C4BPA	C4b-binding protein alpha chain	31	M	PM			XC			3.64153e+08	30	1.21384e+07	0.508509	6.1725e+06	0.380712	0.544939	0.245306	0.664688	0.109374	0.123944	8572.7	8537.1	2834.72	3041.23	7667.3	8006.42	1005.3	855.464	699.07	1058.3
sp|P05107|ITB2_HUMAN	P05107	P05107	ITGB2	Integrin beta-2	48	M	PM		CS	XC			5.21913e+08	44	1.18617e+07	0.511378	6.06579e+06	0.374131	0.335201	0.530852	0.297316	0.354203	0.344622	2844.16	4075.86	5311.63	5108.17	2460.53	2779.66	2080.98	2150.26	2970.87	2283.91
sp|P27487|DPP4_HUMAN	P27487	P27487	DPP4	Dipeptidyl peptidase 4	29	M	PM		CS				4.31886e+08	39	1.1074e+07	0.505589	5.59889e+06	0.345333	0.265265	0.311729	0.261019	0.49589	0.522058	1942.73	2531.46	2483.39	2354.21	1924	1915.23	2246.9	2362.65	3019.3	2715.38
sp|P08670|VIME_HUMAN	P08670	P08670	VIM	Vimentin	34	M	PM						3.60445e+08	32	1.12639e+07	0.495488	5.58113e+06	0.344238	0.225765	0.284617	0.448946	0.510293	0.348352	4110.01	2606.71	2118.84	2600.61	3829.56	3985.56	2429.78	2941.58	2099.37	2192.18
sp|P0C0L5|CO4B_HUMAN	P0C0L5	P0C0L5	C4B	Complement C4-B	39	M	PM			XC			8.17432e+08	80	1.02179e+07	0.530887	5.42455e+06	0.33458	0.344601	0.166511	0.442995	0.230477	0.50264	4469.41	5358.29	2103.47	2048.95	5288.66	5296.23	2221.42	1789.21	2487.48	4259.79
sp|P23528|COF1_HUMAN	P23528	P23528	CFL1	Cofilin-1	11	M				XC	Nuc		1.11489e+08	10	1.11489e+07	0.478679	5.33675e+06	0.329164	0.21799	0.391708	0.358327	0.460247	0.281119	1416.63	1322.19	1881.29	1880.17	1729.13	1671.07	1354.94	1393.71	1455.58	929.33
sp|P13598|ICAM2_HUMAN	P13598	P13598	ICAM2	Intercellular adhesion molecule 2	12	M	PM						1.6902e+08	16	1.05637e+07	0.501746	5.30031e+06	0.326917	0.313952	0.443035	0.289093	0.300174	0.25996	1972.83	2578.58	3259.81	2879.6	1801.22	1825.63	1155.26	1230.87	1421.93	1163.71
sp|P01042-2|KNG1_HUMAN	P01042-2	P01042	KNG1	Isoform LMW of Kininogen-1	25	M	PM			XC			2.71573e+08	26	1.04451e+07	0.500967	5.23265e+06	0.322744	0.558095	0.171769	0.423259	0.097986	0.174224	9668.31	8270.79	1961.72	2014.47	3930.05	4822.84	837.5	724.98	776.197	1407.24
sp|P05546|HEP2_HUMAN	P05546	P05546	SERPIND1	Heparin cofactor 2	25					XC			2.47608e+08	26	9.5234e+06	0.530773	5.05476e+06	0.311772	0.309148	0.124212	0.405238	0.271172	0.49425	4755.58	4394.29	1648.32	1397.21	4755.78	4428.84	1501.13	1924.38	1460.72	3829.04
sp|Q14761|PTCA_HUMAN	Q14761	Q14761	PTPRCAP	Protein tyrosine phosphatase receptor type C-associated protein	4	M	PM						5.05918e+07	5	1.01184e+07	0.496512	5.02389e+06	0.309867	0.0666895	0.407308	0.235066	0.573841	0.478277	42.168	42.6257	227.118	206.022	89.4466	115.522	164.27	183.117	200.93	166.616
sp|P10747-7|CD28_HUMAN	P10747-7	P10747	CD28	Isoform 7 of T-cell-specific surface glycoprotein CD28	9	M	PM						1.12105e+08	11	1.01914e+07	0.483877	4.93136e+06	0.30416	0.0774486	0.207386	0.183612	0.576686	0.781056	242.158	499.152	1535.56	1057.73	635.696	909.867	2042.01	1855.59	3081.42	2743.62
sp|P01848|TCA_HUMAN	P01848	P01848	TRAC	T-cell receptor alpha chain C region	5	M	PM						6.57943e+07	7	9.39919e+06	0.515578	4.84601e+06	0.298896	0.263091	0.50024	0.308204	0.139327	0.205282	255.3	335.339	520.581	504.583	283.623	302.046	93.1877	88.6618	137.567	142.61
sp|P04406|G3P_HUMAN	P04406	P04406	GAPDH	Glyceraldehyde-3-phosphate dehydrogenase	19	M	PM				Nuc		1.67487e+08	17	9.85218e+06	0.486355	4.79166e+06	0.295544	0.222362	0.261381	0.470314	0.329784	0.201506	3932.73	2866.82	2615.43	2666.81	5146.45	4662.15	1374.57	2122.72	1435.91	1415.96
sp|P09326|CD48_HUMAN	P09326	P09326	CD48	CD48 antigen	12	M	PM						1.09726e+08	12	9.14386e+06	0.518607	4.74206e+06	0.292485	0.565328	0.1891	0.129534	0.21664	0.241346	2283.15	2860.81	721.309	757.28	566.009	503.999	653.548	547.332	728.235	665.656
sp|A0A5B9|TRBC2_HUMAN	A0A5B9	A0A5B9	TRBC2	T-cell receptor beta-2 chain C region	8	M						ShG	8.18709e+07	9	9.09677e+06	0.503362	4.57896e+06	0.282425	0.12661	0.264746	0.244582	0.42299	0.518602	207.387	224.59	421.611	371.645	218.323	333.583	373.467	374.606	560.907	501.391
sp|P01011|AACT_HUMAN	P01011	P01011	SERPINA3	Alpha-1-antichymotrypsin	16					XC	Nuc		1.7517e+08	20	8.7585e+06	0.512164	4.48579e+06	0.276678	0.285324	0.191853	0.422296	0.207545	0.241879	2841.67	2280.78	1173.02	1213.64	2364.93	2595.49	593.066	828.286	620.654	1053.81
sp|P30203|CD6_HUMAN	P30203	P30203	CD6	T-cell differentiation antigen CD6	22	M	PM			XC			1.87918e+08	23	8.17035e+06	0.539797	4.41033e+06	0.272024	0.280361	0.426973	0.236955	0.138934	0.203132	1651.81	2483.74	2709.21	2993.4	1292.74	1614.03	571.819	614.498	1180.06	980.816
sp|P01730|CD4_HUMAN	P01730	P01730	CD4	T-cell surface glycoprotein CD4	13	M	PM						1.40591e+08	17	8.27003e+06	0.509489	4.21349e+06	0.259883	0.0793291	0.284589	0.152798	0.501234	0.485267	684.06	873.002	2575.16	2478.44	1176.78	1292.88	2135.42	2753.89	3353.42	2910.62
sp|P06703|S10A6_HUMAN	P06703	P06703	S100A6	Protein S100-A6	5	M	PM				Nuc		3.94488e+07	5	7.88977e+06	0.509547	4.02021e+06	0.247962	0.191186	0.280858	0.34623	0.260053	0.154663	484.396	425.863	526.899	495.083	515.782	592.974	192.785	289.2	196.423	187.768
sp|P32249|GP183_HUMAN	P32249	P32249	GPR183	G-protein coupled receptor 183	3	M	PM						1.09107e+08	15	7.27382e+06	0.520905	3.78897e+06	0.233699	0.144506	0.23	0.138245	0.396032	0.388676	236.596	337.3	392.028	424.85	268.814	248.106	396.961	461.513	514.024	494.47
sp|P68871|HBB_HUMAN	P68871	P68871	HBB	Hemoglobin subunit beta	5					XC			7.04428e+07	11	6.40389e+06	0.57203	3.66321e+06	0.225943	0.658599	0.0735688	0.0680932	0.0726833	0.0164322	938.991	1379.76	104.277	121.97	121.611	109.684	62.357	76.0221	49.2739	18.7629
sp|P11166|GTR1_HUMAN	P11166	P11166	SLC2A1	Solute carrier family 2, facilitated glucose transporter member 1	4	M	PM				Nuc		6.51296e+07	13	5.00997e+06	0.697097	3.49243e+06	0.215409	0.614928	0.04896	0.0625493	0.0970442	0.0481296	298.96	1000.78	47.0894	63.0568	89.4269	78.2698	61.1968	78.8509	52.4094	42.6921
sp|P02748|CO9_HUMAN	P02748	P02748	C9	Complement component C9	18	M	PM			XC			1.66095e+08	26	6.38829e+06	0.537437	3.4333e+06	0.211762	0.251499	0.12843	0.307598	0.110081	0.217795	1769.65	2103.32	773.69	849.985	1985.09	1977.93	466.163	459.627	499.672	992.748
sp|P0CG05|LAC2_HUMAN	P0CG05	P0CG05	IGLC2	Ig lambda-2 chain C regions	5	M	PM			XC			4.81231e+07	7	6.87473e+06	0.486802	3.34663e+06	0.206416	0.189365	0.169998	0.265632	0.204489	0.208808	917.65	588.49	278.304	418.081	701.763	634.714	275.164	317.273	264.732	353.679
sp|Q92854|SEM4D_HUMAN	Q92854	Q92854	SEMA4D	Semaphorin-4D	21	M	PM			XC			2.12172e+08	33	6.42945e+06	0.511919	3.29136e+06	0.203007	0.0890159	0.327293	0.161245	0.249825	0.247722	800.995	1252.99	4002.86	3645.82	1469.32	1745.12	1529.01	1755.66	2018.26	1900.5
sp|P62805|H4_HUMAN	P62805	P62805	HIST1H4A	Histone H4	10	M				XC	Nuc		5.6808e+07	6	9.468e+06	0.346571	3.28134e+06	0.202389	0.125293	0.188931	0.243046	0.329182	0.189883	858.613	549.83	446.487	656.118	923.943	820.066	3261.54	721.209	545.333	454.162
sp|P13987|CD59_HUMAN	P13987	P13987	CD59	CD59 glycoprotein	6	M	PM		CS	XC			3.06898e+07	6	5.11496e+06	0.627	3.20708e+06	0.197809	0.497307	0.116621	0.115852	0.039393	0.0269115	594.921	1368.7	227.72	254.002	244.52	245.158	52.4424	54.1284	47.7954	40.3685
sp|P06239-3|LCK_HUMAN	P06239-3	P06239	LCK	Isoform 3 of Tyrosine-protein kinase Lck	17	M	PM						1.5536e+08	24	6.47332e+06	0.491693	3.18288e+06	0.196316	0.0410515	0.241922	0.135366	0.377694	0.334811	265.536	313.833	1777.62	1463.6	632.875	795.675	1211.24	1441.56	1705.24	1395.05
sp|Q969H8|MYDGF_HUMAN	Q969H8	Q969H8	MYDGF	Myeloid-derived growth factor	2					XC			28092203	5	5.61844e+06	0.546387	3.06984e+06	0.189344	0.234495	0.0957158	0.236421	0.300714	0.0740208	571.656	805.518	429.59	260.197	270.938	624.434	508.295	515.726	165.904	138.585
sp|P26447|S10A4_HUMAN	P26447	P26447	S100A4	Protein S100-A4	4					XC	Nuc		3.51925e+07	6	5.86541e+06	0.491125	2.88065e+06	0.177675	0.134717	0.161066	0.214084	0.213802	0.196153	169.765	199.342	223.904	188.606	208.875	243.566	186.735	157.946	192.627	158.195
sp|P04437|TVA2_HUMAN	P04437	P04437	TCRA	T-cell receptor alpha chain V region CTL-L17	7	M	PM						5.01336e+07	9	5.5704e+06	0.505572	2.81623e+06	0.173702	0.133189	0.184481	0.140934	0.204682	0.250229	429.772	500.456	583.754	548.564	327.153	407.166	374.27	383.973	585.814	512.457
sp|P15153|RAC2_HUMAN	P15153	P15153	RAC2	Ras-related C3 botulinum toxin substrate 2	6	M	PM						3.98567e+07	7	5.69381e+06	0.487989	2.77852e+06	0.171376	0.0313202	0.251429	0.183491	0.255425	0.218027	86.2785	51.5825	354.048	327.694	186.902	232.354	199.946	210.022	240.267	195.708
sp|P04899|GNAI2_HUMAN	P04899	P04899	GNAI2	Guanine nucleotide-binding protein G(i) subunit alpha-2	7	M	PM			XC			9.58202e+07	17	5.63648e+06	0.487037	2.74517e+06	0.169319	0.0638845	0.184883	0.114809	0.304269	0.293449	400.291	609.056	1629.83	1394.88	801.615	841.578	1472.73	1448.24	1823.84	1524.81
sp|P19823|ITIH2_HUMAN	P19823	P19823	ITIH2	Inter-alpha-trypsin inhibitor heavy chain H2	28					XC			242428696	47	5.15806e+06	0.514762	2.65517e+06	0.163768	0.153458	0.0934453	0.26458	0.110147	0.19169	5891.91	4577.41	2596.85	2205.8	5373.98	6068.01	1343.01	1640.32	1392.28	3116.39
sp|P02743|SAMP_HUMAN	P02743	P02743	APCS	Serum amyloid P-component	11					XC	Nuc		4.95795e+07	10	4.95795e+06	0.533362	2.64438e+06	0.163102	0.0146311	0.127109	0.133401	0.234844	0.463954	143.915	109.072	471.88	749.876	977.377	764.634	1179.24	874.052	1062.03	1885.09
sp|Q6PCB8|EMB_HUMAN	Q6PCB8	Q6PCB8	EMB	Embigin	5	M	PM						7.09414e+07	14	5.06724e+06	0.50687	2.56843e+06	0.158418	0.116699	0.25191	0.193187	0.09622	0.107139	263.807	301.309	505.409	514.72	382.366	383.517	121.408	124.033	161.395	150.771
sp|P05141|ADT2_HUMAN	P05141	P05141	SLC25A5	ADP/ATP translocase 2	12	M	PM				Nuc		9.16724e+07	19	4.82486e+06	0.517419	2.49648e+06	0.15398	0.034854	0.305031	0.278229	0.0732764	0.0518705	448.014	318.547	1887.29	2206.18	1777.31	1955.15	320.966	334.355	297.502	258.382
sp|P02730|B3AT_HUMAN	P02730	P02730	SLC4A1	Band 3 anion transport protein	21	M	PM						1.3347e+08	32	4.17093e+06	0.580245	2.42016e+06	0.149273	0.445569	0.0418822	0.0435731	0.0458931	0.00537577	8326.65	12456.2	577.461	926.568	1002.39	936.585	548.721	640.533	426.159	81.9093
sp|P13612|ITA4_HUMAN	P13612	P13612	ITGA4	Integrin alpha-4	21	M	PM		CS				2.21691e+08	45	4.92647e+06	0.487806	2.40316e+06	0.148224	0.085217	0.2105	0.118095	0.226388	0.144308	1078.59	1177.9	2542.97	2302.57	1192.89	1255.09	1460.77	1562.28	1479.01	1087.17
sp|P00739-2|HPTR_HUMAN	P00739-2	P00739	HPR	Isoform 2 of Haptoglobin-related protein	5					XC			86939402	20	4.34697e+06	0.534403	2.32303e+06	0.143282	0.19325	0.0974986	0.123597	0.13288	0.155375	1691.07	2091.4	627.198	835.014	1044.44	1028.45	699.844	717.963	807.121	916.478
sp|P01024|CO3_HUMAN	P01024	P01024	C3	Complement C3	49	M	PM			XC			3.93598e+08	95	4.14314e+06	0.532831	2.20759e+06	0.136162	0.0847664	0.0623076	0.194702	0.136885	0.254447	2647.81	2777.64	1372.42	1615.74	4919.85	4905.48	2547.99	2239.39	2612.64	4544.35
sp|P02749|APOH_HUMAN	P02749	P02749	APOH	Beta-2-glycoprotein 1	5				CS	XC			7.72912e+07	17	4.54654e+06	0.481627	2.18974e+06	0.13506	0.263571	0.11661	0.132522	0.0315973	0.0244166	899.257	692.439	126.152	242.435	255.597	267.689	53.3363	41.4434	42.2046	34.9614
sp|P23229|ITA6_HUMAN	P23229	P23229	ITGA6	Integrin alpha-6	31	M	PM		CS				2.4425e+08	59	4.13984e+06	0.505497	2.09268e+06	0.129074	0.0730045	0.119307	0.0956705	0.22111	0.208944	1228.46	1641.74	2211.81	2123.23	1526.97	1654.21	2384.65	2482.48	2883.17	2560.98
sp|Q6UWD8|CP054_HUMAN	Q6UWD8	Q6UWD8	C16orf54	Transmembrane protein C16orf54	3	M						ShG	3.16541e+07	8	3.95677e+06	0.510398	2.01953e+06	0.124562	0.0150178	0.100466	0.0577483	0.267573	0.323789	3.0934	11.0203	63.5178	58.3426	25.4273	32.5826	79.7088	98.0291	144.304	129.501
sp|P01834|IGKC_HUMAN	P01834	P01834	IGKC	Ig kappa chain C region	5	M	PM			XC			1.90829e+07	5	3.81658e+06	0.523731	1.99886e+06	0.123288	0.060535	0.0384516	0.0900982	0.241232	0.300384	145.383	99.5655	45.4809	50.0487	129.188	113.94	177.981	198.089	166.647	269.278
sp|Q8IWA5-3|CTL2_HUMAN	Q8IWA5-3	Q8IWA5	SLC44A2	Isoform 3 of Choline transporter-like protein 2	15	M	PM						1.07435e+08	28	3.83698e+06	0.520728	1.99802e+06	0.123235	0.131187	0.185275	0.0919392	0.0883802	0.0946436	2058.33	2982.57	3406.2	3333.44	1593.19	1607.15	918.066	1003.18	1319.32	1172.77
sp|O14745|NHRF1_HUMAN	O14745	O14745	SLC9A3R1	Na(+)/H(+) exchange regulatory cofactor NHE-RF1	15	M	PM						9.07397e+07	22	4.12453e+06	0.482824	1.99142e+06	0.122828	0.0400286	0.198933	0.110679	0.171246	0.137033	466.725	528.747	2235.16	2079.51	1137.02	1124.09	1151.23	1129.33	1274.21	986.564
sp|P13693|TCTP_HUMAN	P13693	P13693	TPT1	Translationally-controlled tumor protein	5					XC	Nuc		3.31088e+07	8	4.1386e+06	0.463046	1.91636e+06	0.118199	0.0596705	0.167846	0.0891615	0.159591	0.156546	398.779	342.65	396.262	762.744	1306.41	393.665	257.298	457.534	478.294	489.953
sp|O00478|BT3A3_HUMAN	O00478	O00478	BTN3A3	Butyrophilin subfamily 3 member A3	11	M	PM						8.22957e+07	22	3.74071e+06	0.504659	1.88779e+06	0.116436	0.105053	0.186295	0.123066	0.0671355	0.0716966	904.954	1089.89	1617.91	1529.52	919.532	981.687	331.275	347.737	500.177	405.411
sp|P31146|COR1A_HUMAN	P31146	P31146	CORO1A	Coronin-1A	9	M	PM						7.33256e+07	20	3.66628e+06	0.505273	1.85247e+06	0.114258	0.0137311	0.197922	0.185661	0.108609	0.0816717	145.252	109.38	1142.22	1247.68	984.303	1137.13	478.484	431.939	461.967	354.588
sp|P14618|KPYM_HUMAN	P14618	P14618	PKM	Pyruvate kinase PKM	20	M	PM			XC	Nuc		1.07404e+08	30	3.58013e+06	0.509878	1.82543e+06	0.11259	0.0290773	0.196339	0.186112	0.0871885	0.0637684	439.286	356.451	1793.59	1904.71	1663.15	1754.19	380.905	533.616	505.341	426.062
sp|P30511-3|HLAF_HUMAN	P30511-3	P30511	HLA-F	Isoform 3 of HLA class I histocompatibility antigen, alpha chain F	4	M	PM		CS				7.71611e+07	20	3.85806e+06	0.437689	1.68863e+06	0.104153	0.0617854	0.133788	0.0840323	0.135158	0.13884	566.702	555.602	1324.54	952.074	691.863	581.008	707.839	606.796	1046.24	680.478
sp|P61626|LYSC_HUMAN	P61626	P61626	LYZ	Lysozyme C	5					XC			2.77152e+07	9	3.07947e+06	0.534429	1.64575e+06	0.101508	0.0526001	0.15161	0.167001	0.0859239	0.0403796	280.091	169.748	242.656	387.189	346.935	414.376	96.19	138.438	62.7678	71.0233
sp|Q9Y639|NPTN_HUMAN	Q9Y639	Q9Y639	NPTN	Neuroplastin	6	M			CS				64046723	20	3.20234e+06	0.509098	1.6303e+06	0.100555	0.0769596	0.128235	0.0771396	0.11896	0.11983	981.812	1283.87	1665.61	1692.93	1009.17	989.447	882.071	990.792	1291.82	1089.54
sp|Q969P0|IGSF8_HUMAN	Q969P0	Q969P0	IGSF8	Immunoglobulin superfamily member 8	16	M	PM						7.85434e+07	24	3.27264e+06	0.493098	1.61373e+06	0.0995332	0.0732634	0.117562	0.0650301	0.119232	0.152184	591.487	748.814	1056.68	950.888	553.974	511.045	598.734	608.42	968.715	847.771
sp|Q06830|PRDX1_HUMAN	Q06830	Q06830	PRDX1	Peroxiredoxin-1	9					XC	Nuc		4.46245e+07	14	3.18746e+06	0.504153	1.60697e+06	0.0991159	0.0791104	0.0747139	0.132411	0.149129	0.0784695	942.631	769.5	560.133	575.114	970.141	990.281	478.258	724.201	466.682	416.004
sp|Q9Y6W8|ICOS_HUMAN	Q9Y6W8	Q9Y6W8	ICOS	Inducible T-cell costimulator	2	M	PM			XC			2.61762e+07	8	3.27202e+06	0.474108	1.55129e+06	0.0956819	0.0762189	0.125419	0.0641872	0.108609	0.120803	161.151	165.09	233.563	214.98	136.87	106.897	119.265	117.449	177.77	142.612
sp|P05155-3|IC1_HUMAN	P05155-3	P05155	SERPING1	Isoform 3 of Plasma protease C1 inhibitor	8					XC			6.75578e+07	23	2.93729e+06	0.519449	1.52578e+06	0.094108	0.0977167	0.0807782	0.156529	0.051999	0.0573555	978.935	920.157	582.849	601.956	970.43	1133.31	227.905	244.462	194.93	294.367
sp|P19397|CD53_HUMAN	P19397	P19397	CD53	Leukocyte surface antigen CD53	3	M	PM		CS				20269440	7	2.89563e+06	0.521433	1.50988e+06	0.0931275	0.126647	0.130409	0.123909	0.0115278	0.00881814	418.583	464.515	330.905	378.52	339.934	349.435	20.2377	21.1094	20.3324	17.628
sp|P62937|PPIA_HUMAN	P62937	P62937	PPIA	Peptidyl-prolyl cis-trans isomerase A	4	M				XC	Nuc		3.29526e+07	10	3.29526e+06	0.457772	1.50848e+06	0.0930412	0.0285965	0.225868	0.132688	0.0261337	0.0237806	161.304	154.872	1206.91	968.035	621.293	552.519	89.6441	70.6615	72.224	70.1945
sp|P04083|ANXA1_HUMAN	P04083	P04083	ANXA1	Annexin A1	20	M	PM		CS	XC	Nuc		5.68184e+07	19	2.99044e+06	0.500071	1.49543e+06	0.0922365	0.0486059	0.0705725	0.168429	0.107644	0.0821442	734.2	680.859	770.678	782.313	1835.95	1814.03	613.657	752.802	701.336	627.143
sp|P00751|CFAB_HUMAN	P00751	P00751	CFB	Complement factor B	22	M	PM			XC			9.95768e+07	36	2.76602e+06	0.534922	1.4796e+06	0.0912602	0.111324	0.0550728	0.103006	0.0789754	0.101675	4474.33	3953.66	1371.21	1547.83	2434.8	2812.73	927.092	1400.31	949.822	1968.09
sp|P0CG48|UBC_HUMAN	P0CG48	P0CG48	UBC	Polyubiquitin-C	14	M	PM			XC	Nuc		1.36196e+08	44	3.09536e+06	0.475349	1.47138e+06	0.0907527	0.0706411	0.0632082	0.0792798	0.158314	0.121944	910.072	932.634	762.865	660.396	1000.59	804.775	1015.24	1043.51	1077.96	877.478
sp|P04114|APOB_HUMAN	P04114	P04114	APOB	Apolipoprotein B-100	111	M	PM			XC			6.96e+08	250	2.784e+06	0.527219	1.46778e+06	0.0905308	0.0942094	0.0965896	0.0795628	0.0852906	0.0952567	12575.8	14269.8	6102.3	11578	10781.6	9266.02	6223.85	6449.85	8640.44	7863.98
sp|P08648|ITA5_HUMAN	P08648	P08648	ITGA5	Integrin alpha-5	12	M	PM		CS				9.79908e+07	35	2.79974e+06	0.510733	1.42992e+06	0.0881956	0.0536606	0.0960145	0.0802654	0.132546	0.110768	420.773	473.151	632.629	669.974	494.146	544.165	535	583.491	602.747	532.328
sp|P84095|RHOG_HUMAN	P84095	P84095	RHOG	Rho-related GTP-binding protein RhoG	10	M	PM						3.13991e+07	11	2.85446e+06	0.488075	1.39319e+06	0.0859303	0.0282403	0.154499	0.11657	0.0727823	0.0610382	271.705	296.913	1133.33	1285.48	776.004	942.335	813.095	382.041	421.537	349.771
sp|P27797|CALR_HUMAN	P27797	P27797	CALR	Calreticulin	10	M	PM		CS	XC	Nuc		5.48486e+07	19	2.88677e+06	0.481697	1.39055e+06	0.0857674	0.0702262	0.0742967	0.0996218	0.121932	0.0782647	1087.96	764.257	491.101	639.862	943.836	833.59	568.086	662.493	529.114	464.224
sp|P01860|IGHG3_HUMAN	P01860	P01860	IGHG3	Ig gamma-3 chain C region	6	M	PM			XC			4.93664e+07	17	2.9039e+06	0.474373	1.37753e+06	0.0849646	0.107157	0.0561949	0.131798	0.0466151	0.0550811	1885.33	1373.92	518.56	570.186	1490.93	1299.3	222.894	298.396	233.274	384.917
sp|P01008|ANT3_HUMAN	P01008	P01008	SERPINC1	Antithrombin-III	18	M	PM			XC			6.50383e+07	27	2.40882e+06	0.549721	1.32418e+06	0.0816739	0.0530068	0.019976	0.0483854	0.14028	0.21713	1568.97	1121.87	333.687	334.577	763.387	787.377	1313.52	1482.28	1124.11	2504.68
sp|P05023-4|AT1A1_HUMAN	P05023-4	P05023	ATP1A1	Isoform 4 of Sodium/potassium-transporting ATPase subunit alpha-1	19	M	PM			XC			1.16292e+08	45	2.58427e+06	0.504063	1.30263e+06	0.0803448	0.0355835	0.0891307	0.0811015	0.117078	0.114999	501.134	565.265	1111.08	1120.49	860.915	990.582	924.02	928.542	1129.24	995.679
sp|P08195-4|4F2_HUMAN	P08195-4	P08195	SLC3A2	Isoform 4 of 4F2 cell-surface antigen heavy chain	23	M	PM		CS		Nuc		7.47164e+07	28	2.66844e+06	0.488042	1.30231e+06	0.080325	0.0477662	0.0946739	0.0747629	0.106913	0.10272	1039.9	852.052	1551.38	1336.45	842.812	1025.39	929.64	952.136	1054.06	998.67
sp|P11021|GRP78_HUMAN	P11021	P11021	HSPA5	78 kDa glucose-regulated protein	25	M	PM		CS		Nuc		8.90754e+07	32	2.7836e+06	0.463975	1.29152e+06	0.0796596	0.0583081	0.0663511	0.100485	0.118069	0.0735952	2653.48	1673.69	1290.93	1507.2	2968.27	2217.72	1275.94	1692.02	1333.27	1151.37
sp|P01733|TVB1_HUMAN	P01733	P01733	TRBV12-3	T-cell receptor beta chain V region YT35	3	M	PM						1.97603e+07	8	2.47004e+06	0.510295	1.26045e+06	0.0777429	0.0414487	0.0797261	0.042927	0.109991	0.16103	213.404	255.123	380.552	388.344	183.267	203.155	312.984	338.001	565.036	540.216
sp|P11279|LAMP1_HUMAN	P11279	P11279	LAMP1	Lysosome-associated membrane glycoprotein 1	3	M	PM						4.42994e+07	19	2.33155e+06	0.533721	1.2444e+06	0.0767528	0.181029	0.0521592	0.0336712	0.0318475	0.0230505	617.563	890.209	186.527	202.98	208.547	127.31	85.8371	78.1887	90.0813	61.7798
sp|P62879|GBB2_HUMAN	P62879	P62879	GNB2	Guanine nucleotide-binding protein G(I)/G(S)/G(T) subunit beta-2	3	M	PM			XC			3.19064e+07	13	2.45434e+06	0.493555	1.21135e+06	0.0747146	0.0374765	0.0975464	0.0856741	0.0802124	0.08939	180.018	236.692	519.616	487.543	399.086	416.037	279.469	252.924	367.135	307.706
sp|P40926|MDHM_HUMAN	P40926	P40926	MDH2	Malate dehydrogenase, mitochondrial	5	M	PM				Nuc		46926873	20	2.34634e+06	0.510639	1.19813e+06	0.0738995	0.0761947	0.023392	0.162771	0.0578315	0.0323696	2690.54	1503.87	327.75	365.367	676.355	2470.14	963.384	569.865	380.346	348.212
sp|P19827|ITIH1_HUMAN	P19827	P19827	ITIH1	Inter-alpha-trypsin inhibitor heavy chain H1	15					XC			7.18179e+07	33	2.1763e+06	0.547415	1.19134e+06	0.0734803	0.0525675	0.0333168	0.105369	0.0718282	0.126694	1656.37	1344.77	814.582	674.485	1733.72	2072.54	687.104	917.38	710.124	1766.47
sp|P06733|ENOA_HUMAN	P06733	P06733	ENO1	Alpha-enolase	15	M	PM			XC	Nuc		5.45536e+07	22	2.47971e+06	0.470926	1.16776e+06	0.0720261	0.0455595	0.0619826	0.112189	0.101179	0.0518061	1065.13	817.217	998.279	879.843	2236.9	1547.27	455.611	906.088	475.997	506.478
sp|Q6GTX8|LAIR1_HUMAN	Q6GTX8	Q6GTX8	LAIR1	Leukocyte-associated immunoglobulin-like receptor 1	1	M	PM						21419764	10	2.14198e+06	0.5388	1.1541e+06	0.0711833	0.0618253	0.0817481	0.0562766	0.0863994	0.0801041	29.4575	29.8392	17.7906	31.223	15.434	20.8837	21.8971	20.8188	21.4217	21.0716
sp|P01619|KV320_HUMAN	P01619	P01619	IGKV3-20	Immunoglobulin kappa variable 3-20	2	M	PM			XC			10745975	5	2149195	0.509246	1.09447e+06	0.0675055	0.0305912	0.0261429	0.0454936	0.140535	0.159448	105.706	54.591	25.1414	36.9194	72.2978	62.4213	108.765	125.208	106.545	155.083
sp|P11169|GTR3_HUMAN	P11169	P11169	SLC2A3	Solute carrier family 2, facilitated glucose transporter member 3	5	M	PM						2.23286e+07	10	2.23286e+06	0.480284	1.0724e+06	0.0661446	0.0903405	0.0399603	0.0325051	0.0996727	0.076513	606.999	775.239	277.812	271.368	309.051	214.468	497.129	427.024	522.945	357.857
sp|Q93033|IGSF2_HUMAN	Q93033	Q93033	CD101	Immunoglobulin superfamily member 2	26	M	PM						1.11247e+08	54	2.06012e+06	0.517506	1.06613e+06	0.0657574	0.0506702	0.0775093	0.0838841	0.0906722	0.0279817	1172.32	1487.36	1917.03	1800.51	1703.81	1893.23	1169.79	1328.81	523.935	447.674
sp|P01737|TVA3_HUMAN	P01737	P01737	TRAV8-4	T-cell receptor alpha chain V region PY14	4	M	PM						1.20301e+07	6	2.00501e+06	0.516833	1.03626e+06	0.0639151	0.0258881	0.0853797	0.0587465	0.0896503	0.086237	57.8169	60.8731	154.371	158.876	89.2515	106.21	80.1329	105.245	124.864	110.52
sp|P23396-2|RS3_HUMAN	P23396-2	P23396	RPS3	Isoform 2 of 40S ribosomal protein S3	13	M	PM				Nuc		4.13932e+07	20	2.06966e+06	0.494277	1.02298e+06	0.0630964	0.0260859	0.0907747	0.0766867	0.0731578	0.0624259	429.242	295.031	578.786	812.464	973.304	666.869	256.399	413.091	394.106	384.812
sp|P11362-21|FGFR1_HUMAN	P11362-21	P11362	FGFR1	Isoform 21 of Fibroblast growth factor receptor 1	3	M	PM			XC	Nuc		7.71755e+07	37	2.08582e+06	0.488665	1.01927e+06	0.0628673	0.0170372	0.0856009	0.0489153	0.101391	0.09834	70.3692	80.0332	393.896	318.219	131.836	176.675	236.241	237.789	281.54	251.781
sp|Q05682-4|CALD1_HUMAN	Q05682-4	Q05682	CALD1	Isoform 4 of Caldesmon	10	M	PM						3.7624e+07	22	1.71018e+06	0.559299	956502	0.0589959	0.0367486	0.0468052	0.0787044	0.0935626	0.0580483	840.27	792.105	706.365	798.387	792.284	1304.37	661.81	1006.86	610.989	681.952
sp|Q13790|APOF_HUMAN	Q13790	Q13790	APOF	Apolipoprotein F	3					XC			2.17218e+07	13	1.67091e+06	0.559846	935450	0.0576974	0.0445908	0.0242218	0.0827491	0.0597283	0.0931494	255.888	268.435	120.042	115.392	300.97	383.014	170.301	179.513	137.114	305.629
sp|Q14624|ITIH4_HUMAN	Q14624	Q14624	ITIH4	Inter-alpha-trypsin inhibitor heavy chain H4	19	M	PM			XC			7.76429e+07	44	1.76461e+06	0.525471	927252	0.0571918	0.0707184	0.0388639	0.0924919	0.0251422	0.0385452	2538.59	2315.98	906.16	1007.23	1939.05	2328.98	353.735	411.084	359.229	688.01
sp|P19440|GGT1_HUMAN	P19440	P19440	GGT1	Gamma-glutamyltranspeptidase 1	10	M	PM			XC			4.25221e+07	23	1.84878e+06	0.500594	925491	0.0570832	0.0290272	0.0576414	0.0502845	0.0882576	0.0887833	471.647	546.484	896.468	858.785	688.781	727.889	758.729	829.56	1048.91	911.015
sp|P14625|ENPL_HUMAN	P14625	P14625	HSP90B1	Endoplasmin	25	M	PM			XC	Nuc		7.72422e+07	40	1.93105e+06	0.475805	918806	0.0566709	0.0409045	0.0468046	0.0755486	0.0807788	0.0512094	1979.72	1225.25	987.733	1109.48	1994.13	1739.95	894.678	1208.02	884.748	836.035
sp|Q9Y5S1|TRPV2_HUMAN	Q9Y5S1	Q9Y5S1	TRPV2	Transient receptor potential cation channel subfamily V member 2	11	M	PM		CS				5.21194e+07	29	1.79722e+06	0.502613	903306	0.0557148	0.0185761	0.0748675	0.0551523	0.0778218	0.0765897	285.788	286.61	914.976	914.128	678.687	654.272	515.308	599.461	671.558	644.063
sp|Q13291-4|SLAF1_HUMAN	Q13291-4	Q13291	SLAMF1	Isoform 4 of Signaling lymphocytic activation molecule	4	M	PM						2.62538e+07	15	1.75026e+06	0.502089	878784	0.0542024	0.0233675	0.0536744	0.0578651	0.0863112	0.0769642	199.008	205.796	401.17	374.085	347.717	391.832	425.614	379.504	332.822	369.433
sp|P31947|1433S_HUMAN	P31947	P31947	SFN	14-3-3 protein sigma	8	M				XC	Nuc		4.30137e+07	16	2.68836e+06	0.317401	853287	0.0526297	0.03067	0.0330363	0.0627906	0.0814598	0.0806267	467.632	428.18	429.173	364.99	4330.16	674.009	230.631	567.779	238.14	613.498
sp|Q03135|CAV1_HUMAN	Q03135	Q03135	CAV1	Caveolin-1	3	M	PM		CS				1.66403e+07	10	1.66403e+06	0.508705	846500	0.0522111	0.0387687	0.0422431	0.0649935	0.0792463	0.0485512	834.891	577.715	427.936	498.157	690.353	744.665	350.622	589.57	404.645	394.325
sp|P09871|C1S_HUMAN	P09871	P09871	C1S	Complement C1s subcomponent	6					XC			3.90542e+07	24	1.62726e+06	0.509269	828712	0.051114	0.0552123	0.0399498	0.0668281	0.0365418	0.0509846	681.413	567.755	296.907	325.1	479.24	528.375	181.613	187.602	186.444	285.749
sp|P12931-2|SRC_HUMAN	P12931-2	P12931	SRC	Isoform 2 of Proto-oncogene tyrosine-protein kinase Src	1	M	PM				Nuc		42402596	25	1.6961e+06	0.478953	812354	0.050105	0.00893766	0.0569144	0.0338282	0.100416	0.0926267	8.37793	9.49003	66.5767	47.8237	21.4975	27.6173	51.3103	53.2315	60.8586	53.6046
sp|P63104|1433Z_HUMAN	P63104	P63104	YWHAZ	14-3-3 protein zeta/delta	4	M				XC	Nuc		2.45296e+07	14	1.75212e+06	0.461203	808082	0.0498415	0.0296656	0.0454627	0.0564451	0.0738773	0.0618845	262.696	272.725	400.672	330.752	632.533	398.984	281.362	339.082	352.23	310.081
sp|P26010|ITB7_HUMAN	P26010	P26010	ITGB7	Integrin beta-7	12	M	PM		CS				61706372	37	1.66774e+06	0.483057	805614	0.0496893	0.0356333	0.0764194	0.0468134	0.0508835	0.0396306	369.712	425.165	902.934	721.578	410.096	429.468	316.013	303.111	288.202	257.724
sp|P07237|PDIA1_HUMAN	P07237	P07237	P4HB	Protein disulfide-isomerase	12	M	PM			XC			5.6747e+07	35	1.62134e+06	0.481006	779876	0.0481018	0.034523	0.0389046	0.0603614	0.0770141	0.0425909	1577.1	979.252	797.528	873.301	1559.47	1316.45	665.349	1090.64	707.061	658.453
sp|P60903|S10AA_HUMAN	P60903	P60903	S100A10	Protein S100-A10	1	M	PM						6.28789e+06	4	1.57197e+06	0.48692	765424	0.0472104	0.0328375	0.0360716	0.061487	0.0699019	0.0488286	397.439	261.748	244.833	227.539	391.266	376.838	176.303	278.18	219.473	212.133
sp|Q15762|CD226_HUMAN	Q15762	Q15762	CD226	CD226 antigen	3	M	PM		CS				2.06324e+07	14	1.47374e+06	0.514779	758652	0.0467927	0.0378638	0.0732081	0.0431762	0.0394434	0.0366549	291.887	368.204	485.911	563.378	369.989	322.824	177.163	191.497	221.053	194.275
sp|P21333|FLNA_HUMAN	P21333	P21333	FLNA	Filamin-A	65	M	PM			XC	Nuc		1.84824e+08	129	1.43274e+06	0.523627	750223	0.0462729	0.028599	0.0504525	0.0631	0.0593282	0.0369346	4142.34	3757.51	4304.39	5245.77	5340.75	6374.37	3195.5	3891.66	2953.59	2644.87
sp|P16284|PECA1_HUMAN	P16284	P16284	PECAM1	Platelet endothelial cell adhesion molecule	14	M	PM			XC			6.25104e+07	43	1.45373e+06	0.515233	749010	0.0461981	0.0305635	0.0810484	0.0388365	0.036166	0.0438567	608.31	785.884	1669.22	1649.21	665.877	767.808	423.896	464.278	661.318	614.628
sp|P68371|TBB4B_HUMAN	P68371	P68371	TUBB4B	Tubulin beta-4B chain	11					XC	Nuc		2.88326e+07	19	1.5175e+06	0.483949	734394	0.0452966	0.0172165	0.0615992	0.0536244	0.0565472	0.0510919	312.07	323.358	936.695	915.569	853.19	774.39	568.245	530.242	599.788	523.014
sp|P02751-15|FINC_HUMAN	P02751-15	P02751	FN1	Isoform 15 of Fibronectin	15	M	PM			XC			1.29883e+08	96	1.35295e+06	0.533369	721620	0.0445087	0.0322809	0.0349225	0.0591492	0.0697523	0.0370853	896.917	670.961	496.22	574.427	690.159	945.275	406.446	723.825	427.627	420.122
sp|Q99795|GPA33_HUMAN	Q99795	Q99795	GPA33	Cell surface A33 antigen	7	M	PM						2.00886e+07	15	1.33924e+06	0.531459	711753	0.0439001	0.0383997	0.0391624	0.0318678	0.0586009	0.0643787	261.835	394.09	353.897	318.064	222.947	251.466	273.302	300.259	319.743	360.107
sp|P30101|PDIA3_HUMAN	P30101	P30101	PDIA3	Protein disulfide-isomerase A3	11				CS		Nuc		3.99001e+07	27	1.47778e+06	0.475318	702416	0.0433241	0.0311401	0.0341118	0.0531191	0.0703129	0.0405151	1347.88	823.991	619.097	714.307	1247.38	1080.72	662.917	928.884	684.087	584.308
sp|B0I1T2|MYO1G_HUMAN	B0I1T2	B0I1T2	MYO1G	Unconventional myosin-Ig	14	M	PM						7.62772e+07	53	1.43919e+06	0.485453	698660	0.0430925	0.00689574	0.0583025	0.0427548	0.0700167	0.0632339	147.444	130.744	945.669	874.789	490.246	623.278	665.861	662.772	872.317	653.447
sp|Q15286|RAB35_HUMAN	Q15286	Q15286	RAB35	Ras-related protein Rab-35	5	M	PM						1.73997e+07	12	1.44998e+06	0.481118	697611	0.0430278	0.0100957	0.0611248	0.0375755	0.0708074	0.0594192	138.034	146.872	770.955	703.718	401.679	420.308	502.902	514.289	619.863	471.143
sp|P18428|LBP_HUMAN	P18428	P18428	LBP	Lipopolysaccharide-binding protein	4				CS	XC			1.68473e+07	14	1.20338e+06	0.546856	658074	0.0405892	0.0616965	0.01698	0.0396682	0.0293964	0.0476942	395.23	545.527	94.0366	118.815	295.096	269.684	127.209	129.769	160.39	229.849
sp|P69905|HBA_HUMAN	P69905	P69905	HBA1	Hemoglobin subunit alpha	3	M				XC			9200598	8	1.15007e+06	0.560638	644776	0.039769	0.0762699	0.0239377	0.0263006	0.0414543	0.0132412	223.49	348.852	62.3996	86.6461	109.316	92.4937	58.8753	94.6633	59.7515	33.0093
sp|P0C0L4|CO4A_HUMAN	P0C0L4	P0C0L4	C4A	Complement C4-A	3	M	PM			XC			9.87669e+07	80	1.23459e+06	0.517474	638866	0.0394045	0.0502121	0.0218526	0.0571273	0.0139969	0.0433321	634.153	759.148	262.859	261.455	761.113	664.079	166.397	105.651	177.851	357.067
sp|P35579|MYH9_HUMAN	P35579	P35579	MYH9	Myosin-9	34	M	PM				Nuc		1.2984e+08	102	1.27294e+06	0.497948	633856	0.0390955	0.0244551	0.0334612	0.0486634	0.0640845	0.03775	2591.24	2148.07	1863.99	2325.93	2739.73	3286.54	3445.64	2810.31	1839.53	1807.25
sp|P09429|HMGB1_HUMAN	P09429	P09429	HMGB1	High mobility group protein B1	3	M	PM		CS	XC	Nuc		9.19705e+06	7	1.31386e+06	0.474438	623347	0.0384473	0.020463	0.0314528	0.0514798	0.0618233	0.0418019	916.467	376.221	398.358	457.626	829.283	727.727	306.596	567.478	371.79	418.881
sp|P25705|ATPA_HUMAN	P25705	P25705	ATP5A1	ATP synthase subunit alpha, mitochondrial	12	M	PM						3.75583e+07	31	1.21156e+06	0.513706	622385	0.0383879	0.0153417	0.0500345	0.0890909	0.0175262	0.0113443	477.319	326.415	598.886	842.447	1393.61	1457.43	160.89	186.169	156.207	131.552
sp|P11171|41_HUMAN	P11171	P11171	EPB41	Protein 4.1	22	M	PM				Nuc		5.31177e+07	43	1.2353e+06	0.498378	615644	0.0379722	0.020132	0.0569651	0.0310588	0.0404498	0.0506109	600.579	852.949	2045.49	1909.95	889.068	1011.76	813.479	855.611	1488.11	1168.7
sp|P01591|IGJ_HUMAN	P01591	P01591	JCHAIN	Immunoglobulin J chain	1					XC			9626649	8	1.20333e+06	0.508474	611862	0.0377389	0.026679	0.0122568	0.0293517	0.0819703	0.0663459	110.796	56.8659	16.5968	20.6746	27.9745	48.1031	67.5656	87.2293	57.3516	77.0758
sp|P08571|CD14_HUMAN	P08571	P08571	CD14	Monocyte differentiation antigen CD14	4	M	PM			XC			1.93437e+07	16	1.20898e+06	0.505383	610999	0.0376857	0.0539654	0.0178018	0.0490446	0.0157014	0.0408006	638.419	655.08	153.279	171.009	521.806	457.749	143.278	95.1568	157.027	269.94
sp|P00734|THRB_HUMAN	P00734	P00734	F2	Prothrombin	8	M	PM			XC			3.78958e+07	31	1.22244e+06	0.498146	608956	0.0375597	0.0495564	0.0208139	0.0476871	0.0240755	0.0379277	1818.72	1426.33	528.173	474.079	950.353	1055.31	333.383	345.954	295.017	594.974
sp|P02787|TRFE_HUMAN	P02787	P02787	TF	Serotransferrin	14	M	PM		CS	XC			5.12374e+07	40	1.28094e+06	0.474895	608310	0.0375198	0.0541431	0.0287954	0.0487517	0.0192719	0.0205583	2093.72	1859.27	1030.29	782.528	1219.98	1287.2	318.416	330.405	472.791	384.776
sp|P11049|CD37_HUMAN	P11049	P11049	CD37	Leukocyte antigen CD37	5	M	PM						1.54798e+07	13	1.19075e+06	0.510111	607414	0.0374646	0.0257584	0.0375616	0.0244381	0.0561483	0.0600636	222.182	311.224	401.818	359.149	239.441	227.028	294.284	338.699	409.232	395.537
sp|P04156|PRIO_HUMAN	P04156	P04156	PRNP	Major prion protein	2	M	PM		CS		Nuc		1.07332e+07	9	1.19258e+06	0.506766	604359	0.0372761	0.0636628	0.0374416	0.0271926	0.0194331	0.019192	120.571	148.347	75.2045	69.0439	47.9661	48.7195	25.9962	22.6079	34.9954	24.3744
sp|P02786|TFR1_HUMAN	P02786	P02786	TFRC	Transferrin receptor protein 1	5	M	PM		CS	XC			5.06796e+07	40	1.26699e+06	0.475428	602363	0.037153	0.0244071	0.0393749	0.0274743	0.0612282	0.0489134	384.674	312.035	438.544	398.367	365.305	270.067	281.643	390.806	418.915	340.829
sp|Q9Y624|JAM1_HUMAN	Q9Y624	Q9Y624	F11R	Junctional adhesion molecule A	7	M	PM						1.62923e+07	15	1.08615e+06	0.526828	572215	0.0352935	0.0377147	0.034158	0.0267774	0.0391269	0.0410024	359.182	469.263	268.673	336.337	273.211	256.172	229.698	243.055	290.912	278.059
sp|P10809|CH60_HUMAN	P10809	P10809	HSPD1	60 kDa heat shock protein, mitochondrial	10	M	PM		CS	XC			4.03908e+07	33	1.22396e+06	0.462978	566668	0.0349514	0.0373242	0.0226887	0.0608378	0.026206	0.0198956	1401.79	805.764	332.735	387.618	551.103	1009.83	594.043	282.45	275.058	234.097
sp|Q12918|KLRB1_HUMAN	Q12918	Q12918	KLRB1	Killer cell lectin-like receptor subfamily B member 1	2	M	PM						1.24499e+07	11	1.1318e+06	0.495031	560278	0.0345573	0.0167471	0.0195377	0.0250781	0.0798845	0.0608945	117.034	157.751	165.734	145.641	164.598	181.629	335.021	375.68	414.503	312.631
sp|P08758|ANXA5_HUMAN	P08758	P08758	ANXA5	Annexin A5	4	M	PM				Nuc		2.47062e+07	22	1.12301e+06	0.498796	560152	0.0345495	0.0144253	0.0204723	0.0340688	0.0898944	0.0418938	579.501	355.289	323.686	399.025	581.971	645.166	717.604	1105.38	879.285	562.379
sp|P15529|MCP_HUMAN	P15529	P15529	CD46	Membrane cofactor protein	4	M	PM		CS				1.30533e+07	12	1.08778e+06	0.511751	556671	0.0343348	0.0245764	0.0403884	0.0208748	0.0421843	0.0552471	452.551	621.346	874.966	808.071	360.131	405.785	485.477	532.463	812.128	761.283
sp|P18433|PTPRA_HUMAN	P18433	P18433	PTPRA	Receptor-type tyrosine-protein phosphatase alpha	7	M	PM						3.93623e+07	36	1.0934e+06	0.494189	540344	0.0333278	0.00832444	0.0664435	0.0336998	0.0336922	0.0302615	71.771	92.5377	645.883	584.512	259.945	288.038	162.711	186.989	226.522	183.348
sp|P25445|TNR6_HUMAN	P25445	P25445	FAS	Tumor necrosis factor receptor superfamily member 6	6	M	PM		CS		Nuc		2.11799e+07	19	1.11473e+06	0.48459	540189	0.0333182	0.0243708	0.0464434	0.0299702	0.0388332	0.0303484	250.058	270.597	517.428	408.09	275.405	255.86	188.575	215.269	186.82	183.659
sp|Q01650|LAT1_HUMAN	Q01650	Q01650	SLC7A5	Large neutral amino acids transporter small subunit 1	2	M	PM						1.80464e+07	16	1.1279e+06	0.464329	523717	0.0323023	0.00343678	0.0174937	0.0102984	0.0723102	0.101158	61.8791	39.6481	149.943	159.709	114.356	91.3483	397.477	416.48	825.964	636.053
sp|P58335|ANTR2_HUMAN	P58335	P58335	ANTXR2	Anthrax toxin receptor 2	4	M	PM			XC			2.0878e+07	22	949000	0.52424	497503	0.0306854	0.0246905	0.0244482	0.0193237	0.0539491	0.0454589	106.924	132.461	103.436	103.796	67.1331	79.7089	116.567	144.499	144.454	132.923
sp|P04075-2|ALDOA_HUMAN	P04075-2	P04075	ALDOA	Isoform 2 of Fructose-bisphosphate aldolase A	6	M				XC	Nuc		2.18238e+07	22	991992	0.493743	489789	0.0302096	0.0238553	0.0228303	0.0411968	0.0412007	0.027015	484.491	459.611	344.312	348.092	849.916	610.277	257.431	396.308	214.995	283.682
sp|P02760|AMBP_HUMAN	P02760	P02760	AMBP	Protein AMBP	7	M	PM		CS	XC			1.48385e+07	16	927409	0.525168	487045	0.0300404	0.0378537	0.0185537	0.0442307	0.0175239	0.0238299	755.379	806.309	310.707	312.752	576.039	724.396	225.998	186.358	217.281	276.655
sp|P05026|AT1B1_HUMAN	P05026	P05026	ATP1B1	Sodium/potassium-transporting ATPase subunit beta-1	4	M	PM			XC			1.44038e+07	15	960255	0.50651	486379	0.0299992	0.0124382	0.0290745	0.0113685	0.0567686	0.0653236	135.797	174.887	371.891	323.511	115.234	122.903	346.547	398.502	511.853	500.6
sp|Q92536|YLAT2_HUMAN	Q92536	Q92536	SLC7A6	Y+L amino acid transporter 2	2	M	PM						1.04746e+07	11	952238	0.507714	483464	0.0298195	0.00881638	0.033227	0.0280924	0.0400819	0.0564434	15.2335	12.9204	34.9821	38.5349	26.7126	31.6543	30.3102	29.3263	45.4949	45.0837
sp|B9A064|IGLL5_HUMAN	B9A064	B9A064	IGLL5	Immunoglobulin lambda-like polypeptide 5	3	M	PM						9.63437e+06	11	875852	0.535812	469292	0.0289454	0.0105893	0.00914888	0.0140198	0.0571805	0.0865598	177.953	120.995	63.8893	82.7267	114.838	123.169	323.936	326.191	352.168	539.062
sp|Q92542|NICA_HUMAN	Q92542	Q92542	NCSTN	Nicastrin	3	M	PM						3.01657e+07	28	1.07735e+06	0.431764	465159	0.0286905	0.0113617	0.0317579	0.0185393	0.0484667	0.0522358	234.502	69.6517	156.566	154.07	111.711	87.3858	135.588	148.34	196.005	174.534
sp|Q9HAB3|S52A2_HUMAN	Q9HAB3	Q9HAB3	SLC52A2	Solute carrier family 52, riboflavin transporter, member 2	2	M	PM						6239740	7	891391	0.503785	449070	0.0276981	0.0141062	0.031003	0.0258024	0.03524	0.043603	33.1705	33.5724	56.011	58.3919	43.7076	47.2161	38.9999	41.8727	62.1535	56.5601
sp|P11142|HSP7C_HUMAN	P11142	P11142	HSPA8	Heat shock cognate 71 kDa protein	12	M	PM			XC	Nuc		3.15207e+07	33	955174	0.457491	436983	0.0269526	0.019379	0.0299687	0.0359139	0.0317889	0.0193971	865.448	657.457	626.846	804.6	1587.98	936.82	409.125	538.437	419.098	358.67
sp|P62834|RAP1A_HUMAN	P62834	P62834	RAP1A	Ras-related protein Rap-1A	4	M	PM						9.06975e+06	10	906975	0.475271	431059	0.0265872	0.00338266	0.0313455	0.019276	0.0567596	0.0449285	39.2701	30.2282	279.58	221.669	111.161	132.443	249.105	253.23	266.399	218.825
sp|P00736|C1R_HUMAN	P00736	P00736	C1R	Complement C1r subcomponent	9					XC			2.79533e+07	33	847069	0.507811	430151	0.0265312	0.0324255	0.017913	0.039409	0.0150627	0.0205684	1098.06	902.138	369.987	394.395	731.195	843.025	200.323	209.225	179.259	311.895
sp|P01023|A2MG_HUMAN	P01023	P01023	A2M	Alpha-2-macroglobulin	20					XC			5.45256e+07	69	790226	0.542813	428945	0.0264568	0.0196129	0.0261557	0.0457187	0.0172132	0.0207452	1507.02	1403.96	1187.9	1481.68	2036.19	2516.31	480.707	615.172	537.853	809.376
sp|P26842|CD27_HUMAN	P26842	P26842	CD27	CD27 antigen	2	M	PM			XC	Nuc		1.20969e+07	15	806457	0.519779	419179	0.0258545	0.0220778	0.037597	0.0326919	0.0157406	0.0153528	158.771	261.948	460.635	353.011	216.557	298.234	97.2328	93.2402	88.3693	99.2812
sp|P04792|HSPB1_HUMAN	P04792	P04792	HSPB1	Heat shock protein beta-1	6	M	PM			XC	Nuc		1.36715e+07	12	1.13929e+06	0.360699	410941	0.0253464	0.027665	0.0162922	0.0361446	0.0288829	0.015766	156.341	268.601	109.33	125.179	1047.03	269.823	127.689	140.004	131.793	83.4295
sp|P11597|CETP_HUMAN	P11597	P11597	CETP	Cholesteryl ester transfer protein	4					XC			1.79663e+07	23	781145	0.523622	409024	0.0252281	0.0261211	0.0181973	0.034754	0.0170215	0.0278775	303.901	321.786	113.785	177.403	401.181	329.184	97.3915	104.688	102.908	187.177
sp|P19652|A1AG2_HUMAN	P19652	P19652	ORM2	Alpha-1-acid glycoprotein 2	4					XC			7.87256e+06	10	787256	0.515967	406198	0.0250538	0.048485	0.0206865	0.0288465	0.00431825	0.00204793	695.208	684.649	164.826	231.167	297.263	313.193	25.369	30.4433	13.6249	15.7615
sp|P12814-4|ACTN1_HUMAN	P12814-4	P12814	ACTN1	Isoform 4 of Alpha-actinin-1	8	M	PM			XC			4.02047e+07	54	744532	0.530905	395276	0.0243801	0.0182421	0.0186653	0.0338334	0.0383219	0.0178331	1001.04	865.752	630.01	701.018	942.767	1234.58	552.378	908.005	558.882	461.281
sp|P08514|ITA2B_HUMAN	P08514	P08514	ITGA2B	Integrin alpha-IIb	6	M	PM		CS				28192487	37	761959	0.517831	394566	0.0243363	0.00471081	0.0222048	0.0170077	0.0742246	0.0280797	37.0535	51.9293	173.783	193.705	141.124	144.152	389.259	408.496	159.175	168.706
sp|Q8NEQ5|CA162_HUMAN	Q8NEQ5	Q8NEQ5	C1orf162	Transmembrane protein C1orf162	1	M						ShG	5.55527e+06	7	793609	0.495452	393195	0.0242518	0.00241949	0.0139782	0.00793382	0.0531981	0.0757303	8.83547	6.80423	41.6322	31.1087	10.5087	17.1552	70.6707	74.6921	118.704	116.077
sp|P04211|LV743_HUMAN	P04211	P04211	IGLV7-43	Immunoglobulin lambda variable 7-43	1	M	PM			XC			3.04516e+06	4	761290	0.50894	387451	0.0238975	0.00402651	0.0314261	0.0139048	0.0464016	0.0429074	24.583	8.99827	24.5285	55.5773	40.7631	23.8921	49.4283	51.7709	46.4345	52.2618
sp|P13639|EF2_HUMAN	P13639	P13639	EEF2	Elongation factor 2	12	M	PM				Nuc		3.55598e+07	45	790219	0.485586	383719	0.0236673	0.0109721	0.0334369	0.0325347	0.0243399	0.0196496	527.377	450.408	1157.25	1086.23	1148.14	1026.89	349.859	498.839	527.27	439.636
sp|Q96F46|I17RA_HUMAN	Q96F46	Q96F46	IL17RA	Interleukin-17 receptor A	4	M	PM			XC			1.6176e+07	23	703304	0.535722	376775	0.0232391	0.00736484	0.0393437	0.0256106	0.0297342	0.019686	67.7365	75.246	295.295	318.106	156.736	201.186	101.488	151.67	120.441	109.622
sp|P02790|HEMO_HUMAN	P02790	P02790	HPX	Hemopexin	3					XC			1.5674e+07	22	712453	0.520667	370951	0.0228798	0.0374099	0.0109628	0.0243311	0.0181787	0.0157825	278.322	288.554	69.1926	66.9177	113.47	144.298	57.4987	70.0045	67.1416	66.3498
sp|Q4KMQ2-2|ANO6_HUMAN	Q4KMQ2-2	Q4KMQ2	ANO6	Isoform 2 of Anoctamin-6	8	M	PM		CS				2.88197e+07	42	686183	0.523928	359510	0.0221742	0.0155574	0.0297217	0.0174528	0.0224661	0.0297485	359.951	519.971	843.162	786.127	382.045	448.504	388.897	374.88	453.331	541.911
sp|P01019|ANGT_HUMAN	P01019	P01019	AGT	Angiotensinogen	2					XC			1.16551e+07	18	647506	0.527275	341413	0.021058	0.0170274	0.0120226	0.0187889	0.0304113	0.0362055	313.624	293.734	110.026	164.127	278.938	249.21	215.55	261.917	255.796	340.41
sp|Q9UIB8-3|SLAF5_HUMAN	Q9UIB8-3	Q9UIB8	CD84	Isoform 3 of SLAM family member 5	3	M	PM						1.08905e+07	16	680656	0.500912	340949	0.0210293	0.00557686	0.0174803	0.0146329	0.0504793	0.0365806	29.5724	45.6643	126.104	113.269	72.2442	92.1248	196.854	206.359	193.636	163.252
sp|P22794-2|EVI2A_HUMAN	P22794-2	P22794	EVI2A	Isoform 2 of Protein EVI2A	2	M						ShG	5.8754e+06	9	652822	0.517775	338015	0.0208483	0.0166206	0.0240061	0.0133474	0.0281494	0.027914	121.24	183.151	207.232	209.345	103.081	113.088	152.274	154.866	187.418	167.651
sp|Q9H4E7|DEFI6_HUMAN	Q9H4E7	Q9H4E7	DEF6	Differentially expressed in FDCP 6 homolog	7	M	PM				Nuc		2.10296e+07	32	657175	0.508388	334100	0.0206069	0.00627989	0.0359817	0.0187235	0.0267424	0.0216066	130.281	136.425	532.967	618.588	301.985	312.743	247.796	290.046	347.351	255.83
sp|P78324-2|SHPS1_HUMAN	P78324-2	P78324	SIRPA	Isoform 2 of Tyrosine-protein phosphatase non-receptor type substrate 1	4	M	PM						15845719	25	633829	0.523331	331702	0.020459	0.0254786	0.0137446	0.0174681	0.0253235	0.0207616	324.014	430.515	195.212	183.791	223.615	226.943	204.608	213.629	187.527	191.204
sp|P13796|PLSL_HUMAN	P13796	P13796	LCP1	Plastin-2	5	M	PM			XC			2.64337e+07	38	695624	0.473174	329151	0.0203017	0.00529465	0.0340451	0.0255373	0.0220385	0.018904	79.1691	85.4074	507.993	434.6	332.212	316.731	186.66	177.486	208.238	166.201
sp|P09564|CD7_HUMAN	P09564	P09564	CD7	T-cell antigen CD7	3	M	PM						3.33341e+06	6	555569	0.586548	325868	0.0200991	0.0275829	0.0390799	0.0147911	0.00257848	0.00234618	121.522	277.522	246.347	311.164	109.695	114.424	10.7349	12.9522	25.5136	12.8659
sp|P60174|TPIS_HUMAN	P60174	P60174	TPI1	Triosephosphate isomerase	6					XC	Nuc		1.31386e+07	19	691506	0.469607	324736	0.0200293	0.0114863	0.0164752	0.0257347	0.0307774	0.0229702	487.069	276.405	324.019	313.744	650.646	476.151	242.326	369.762	258.15	301.269
sp|Q96D31|CRCM1_HUMAN	Q96D31	Q96D31	ORAI1	Calcium release-activated calcium channel protein 1	2	M	PM						3.61333e+06	6	602222	0.530079	319225	0.0196894	0.0118214	0.0187588	0.0135562	0.022615	0.0414489	18.1695	74.7829	122.535	93.9106	52.9271	65.9369	75.3968	71.4255	128.985	142.911
sp|Q6E0U4|DMKN_HUMAN	Q6E0U4	Q6E0U4	DMKN	Dermokine	4					XC			8.48644e+06	16	530403	0.598413	317400	0.0195768	0.0101903	0.015977	0.0353537	0.0321179	0.00828132	223.112	180.215	103.296	223.601	342.671	480.724	115.731	283.578	52.667	79.8223
sp|O60449-2|LY75_HUMAN	O60449-2	O60449	LY75	Isoform 2 of Lymphocyte antigen 75	13	M	PM						5.27427e+07	85	620502	0.506119	314048	0.0193701	0.0193961	0.0337645	0.0188973	0.00775275	0.00973099	727.439	1067.49	1834.27	1470.57	725.063	799.66	200.703	213.023	262.239	291.895
sp|P04920|B3A2_HUMAN	P04920	P04920	SLC4A2	Anion exchange protein 2	11	M	PM						2.83674e+07	47	603561	0.504801	304678	0.0187922	0.00454861	0.0200478	0.0136397	0.0362919	0.0343412	220.2	221.922	787.988	774.042	462.355	511.664	670.922	884.004	1100.48	913.181
sp|P43403|ZAP70_HUMAN	P43403	P43403	ZAP70	Tyrosine-protein kinase ZAP-70	7	M	PM						2.26634e+07	36	629538	0.482952	304036	0.0187526	0.00198415	0.0302466	0.0144938	0.0245267	0.0335485	70.6479	60.7259	962.72	732.578	262.786	341.068	358.784	374.768	559.877	559.623
sp|Q96BF3|TMIG2_HUMAN	Q96BF3	Q96BF3	TMIGD2	Transmembrane and immunoglobulin domain-containing protein 2	3	M	PM						4.80252e+06	8	600315	0.494922	297109	0.0183253	0.0206289	0.0321586	0.0108948	0.0127728	0.00958192	93.5898	113.2	139.781	139.651	56.6018	45.9671	41.8071	34.993	38.1275	28.6579
sp|Q9UGN4|CLM8_HUMAN	Q9UGN4	Q9UGN4	CD300A	CMRF35-like molecule 8	2	M	PM						5731122	10	573112	0.517991	296867	0.0183104	0.0160923	0.019026	0.0165529	0.0225104	0.0199731	92.4722	126.915	105.374	118.747	90.4375	100.375	83.474	88.6346	112.611	85.8548
sp|O43852-4|CALU_HUMAN	O43852-4	O43852	CALU	Isoform 4 of Calumenin	4	M				XC			1.00212e+07	17	589484	0.499569	294488	0.0181637	0.0109354	0.0147495	0.0221919	0.0326388	0.0174409	425.226	215.843	200.366	230.385	330.145	336.785	167.13	321.632	171.631	187.625
sp|P60953|CDC42_HUMAN	P60953	P60953	CDC42	Cell division control protein 42 homolog	4	M	PM						5.31006e+06	9	590007	0.49732	293422	0.0180979	0.00761183	0.0189844	0.0237666	0.0297179	0.0174093	64.9217	53.0626	107.931	104.731	97.0539	127.387	92.2267	103.429	97.5231	66.1457
sp|Q96FE7|P3IP1_HUMAN	Q96FE7	Q96FE7	PIK3IP1	Phosphoinositide-3-kinase-interacting protein 1	2	M	PM			XC			4.71056e+06	8	588819	0.482331	284006	0.0175171	0.0151025	0.0328773	0.0188023	0.00657745	0.00785298	129.383	160.461	349.537	276.435	143.374	153.6	41.5019	34.8901	56.2163	45.4755
sp|Q8NG11|TSN14_HUMAN	Q8NG11	Q8NG11	TSPAN14	Tetraspanin-14	2	M	PM		CS				6723513	12	560293	0.506784	283948	0.0175136	0.0120748	0.0253773	0.0106304	0.0213099	0.0223071	90.4464	97.8971	150.167	162.823	81.0434	66.2676	81.2357	86.2572	95.2207	98.5727
sp|P05771-2|KPCB_HUMAN	P05771-2	P05771	PRKCB	Isoform Beta-II of Protein kinase C beta type	5	M	PM				Nuc		1.93269e+07	34	568438	0.493614	280589	0.0173064	0.00218684	0.0188322	0.0154072	0.0252491	0.0382353	45.7897	53.5435	433.028	364.895	212.466	290.048	304.668	308.644	570.94	510.241
sp|P08174-7|DAF_HUMAN	P08174-7	P08174	CD55	Isoform 7 of Complement decay-accelerating factor	6	M	PM		CS	XC			1.5875e+07	30	529165	0.525742	278204	0.0171593	0.0395674	0.0157556	0.0117727	0.00081318	0.000656314	954.593	1267.96	365.116	399.557	428.172	290.069	21.7702	13.01	18.3145	11.4631
sp|P78410|BT3A2_HUMAN	P78410	P78410	BTN3A2	Butyrophilin subfamily 3 member A2	4	M	PM						9.58952e+06	17	564089	0.492685	277918	0.0171417	0.0150767	0.0246408	0.0123387	0.0183904	0.0156736	166.695	162.946	216.396	210.751	92.292	102.534	99.7121	99.2326	112.526	92.3272
sp|P06396|GELS_HUMAN	P06396	P06396	GSN	Gelsolin	7	M	PM			XC			1.68788e+07	32	527463	0.515189	271743	0.0167608	0.0101327	0.00854173	0.0168841	0.0264211	0.0318324	406.044	293.061	181.041	195.504	543.011	375.466	241.288	381.512	272.923	501.793
sp|O75083|WDR1_HUMAN	O75083	O75083	WDR1	WD repeat-containing protein 1	5					XC			1.65674e+07	31	534434	0.502275	268433	0.0165566	0.00440735	0.0310209	0.0266359	0.00987501	0.00974741	47.7188	52.015	297.361	289.723	224.119	241.7	47.0753	58.1852	81.6691	62.6993
sp|P23458|JAK1_HUMAN	P23458	P23458	JAK1	Tyrosine-protein kinase JAK1	12	M	PM				Nuc		3.47064e+07	63	550895	0.485761	267603	0.0165054	0.00182933	0.0238188	0.0108811	0.0320039	0.0265513	115.664	90.6364	1081.99	933.916	348.051	414.516	690.856	791.655	883.968	716.997
sp|O14791-2|APOL1_HUMAN	O14791-2	O14791	APOL1	Isoform 2 of Apolipoprotein L1	4	M				XC			9.48426e+06	20	474213	0.553547	262499	0.0161906	0.0228724	0.0108543	0.0170441	0.0166631	0.0100428	332.867	508.989	192.11	191.15	319.017	291.628	118.876	185.13	84.5784	121.807
sp|P17252|KPCA_HUMAN	P17252	P17252	PRKCA	Protein kinase C alpha type	6	M	PM						16182382	32	505699	0.508692	257245	0.0158666	0.00269607	0.0126988	0.0140837	0.0182547	0.0449582	55.5611	76.2346	402.925	284.158	233.133	306.193	259.534	257.703	610.744	692.87
sp|P68366|TBA4A_HUMAN	P68366	P68366	TUBA4A	Tubulin alpha-4A chain	4					XC			1.11862e+07	21	532676	0.482606	257073	0.0158559	0.00251673	0.0327771	0.0260712	0.00867172	0.00793141	41.2237	35.6856	381.325	367.792	319.755	284.232	60.43	61.388	66.0759	61.2953
sp|Q9Y6M7-13|S4A7_HUMAN	Q9Y6M7-13	Q9Y6M7	SLC4A7	Isoform 13 of Sodium bicarbonate cotransporter 3	11	M	PM						2.69212e+07	55	489477	0.518114	253605	0.015642	0.00460422	0.018843	0.0101857	0.0283305	0.0273205	204.82	244.646	767.541	792.34	354.954	416.134	597.27	751.555	861.824	791.212
sp|P26038|MOES_HUMAN	P26038	P26038	MSN	Moesin	7	M	PM			XC	Nuc		1.79113e+07	34	526803	0.472244	248780	0.0153444	0.0120628	0.0143147	0.0169492	0.019778	0.0165356	292.503	322.131	324.448	302.513	591.324	348.011	218.711	263.688	223.655	240.673
sp|P31785|IL2RG_HUMAN	P31785	P31785	IL2RG	Cytokine receptor common subunit gamma	3	M	PM						6.43313e+06	12	536094	0.462316	247845	0.0152868	0.0082532	0.014699	0.00743204	0.0253168	0.0309382	64.9532	129.778	230.839	182.914	119.28	89.8559	230.225	198.752	362.406	265.153
sp|P34910-2|EVI2B_HUMAN	P34910-2	P34910	EVI2B	Isoform 2 of Protein EVI2B	2	M	PM						7.87382e+06	16	492114	0.489581	240930	0.0148603	0.0146697	0.0172307	0.00822715	0.0169062	0.0192513	207.586	275.44	286.956	256.026	138.242	118.771	173.625	158.48	242.123	197.01
sp|Q96DR8|MUCL1_HUMAN	Q96DR8	Q96DR8	MUCL1	Mucin-like protein 1	1	M				XC			805808	2	402904	0.58376	235199	0.0145068	0.0124045	0.021728	0.0295117	0	0	86.4014	67.1636	29.8317	93.1002	85.6424	122.859	0	0	0	0
sp|P07858|CATB_HUMAN	P07858	P07858	CTSB	Cathepsin B	3	M	PM			XC			7589461	16	474341	0.494934	234768	0.0144802	0.00809725	0.0118842	0.0193277	0.0248845	0.0135917	226.542	104.387	112.353	121.242	168.032	191.579	87.766	160.162	91.9504	95.5001
sp|P61769|B2MG_HUMAN	P61769	P61769	B2M	Beta-2-microglobulin	3	M	PM			XC			2.82921e+06	6	471535	0.495343	233572	0.0144064	0.0112302	0.0110529	0.020684	0.0180506	0.0129091	260.928	194.52	212.095	151.506	166.135	275.466	126.513	156.096	150.698	121.869
sp|P52272|HNRPM_HUMAN	P52272	P52272	HNRNPM	Heterogeneous nuclear ribonucleoprotein M	11	M	PM			XC			2.12882e+07	46	462788	0.498193	230558	0.0142205	0.0055677	0.0151363	0.0183647	0.020152	0.0174872	648.431	367.358	561.571	790.334	1016.3	931.655	536.901	663.827	643.361	628.862
sp|O00186|STXB3_HUMAN	O00186	O00186	STXBP3	Syntaxin-binding protein 3	4	M	PM						1.37063e+07	30	456878	0.499365	228149	0.0140719	0.00349549	0.0239989	0.0121	0.0201189	0.0163061	26.2773	29.053	145.924	157.853	77.7588	77.3264	80.2552	83.4856	92.4428	73.8679
sp|P03952|KLKB1_HUMAN	P03952	P03952	KLKB1	Plasma kallikrein	11	M	PM			XC			1.68138e+07	37	454427	0.501676	227975	0.0140612	0.0207242	0.00946548	0.0229866	0.00434854	0.00481509	1314.58	1099.89	449.509	397.549	725.888	937.999	102.33	115.223	79.6642	139.283
sp|P06727|APOA4_HUMAN	P06727	P06727	APOA4	Apolipoprotein A-IV	5					XC			1.05811e+07	25	423245	0.533686	225880	0.013932	0.0148082	0.00889711	0.0131626	0.0164123	0.0184484	341.695	420.143	188.024	199.766	278.197	287.14	226.067	232.482	210.965	285.283
sp|Q92896-2|GSLG1_HUMAN	Q92896-2	Q92896	GLG1	Isoform 2 of Golgi apparatus protein 1	7	M	PM			XC			2.66827e+07	63	423534	0.524612	222191	0.0137045	0.0271047	0.00963562	0.00798777	0.00957796	0.00687077	1029.23	1278.31	275.826	359.624	353.318	289.652	218.712	225.522	234.036	176.612
sp|B7Z8K6|TRDC_HUMAN	B7Z8K6	B7Z8K6	TRDC	T-cell receptor delta chain C region	1	M	PM						4.30762e+06	10	430762	0.515794	222184	0.0137041	0.00438183	0.0200007	0.00615733	0.0204876	0.026098	23.6743	34.7873	116.043	125.657	29.5721	37.5852	69.8444	81.2047	129.011	112.926
sp|Q8IU68|TMC8_HUMAN	Q8IU68	Q8IU68	TMC8	Transmembrane channel-like protein 8	4	M				XC			1.19757e+07	29	412954	0.535875	221292	0.013649	0.00245266	0.0149997	0.00763852	0.0275793	0.0279492	33.9019	42.0771	192.001	203.642	81.1932	100.757	178.88	236.219	245.044	261.336
sp|P01857|IGHG1_HUMAN	P01857	P01857	IGHG1	Ig gamma-1 chain C region	3	M	PM			XC			5.93494e+06	15	395663	0.546067	216058	0.0133262	0.00603476	0.00548863	0.0153701	0.0236349	0.0257579	185.96	120.131	50.5047	86.464	233.098	235.25	159.923	234.893	165.384	279.465
sp|Q14344|GNA13_HUMAN	Q14344	Q14344	GNA13	Guanine nucleotide-binding protein subunit alpha-13	6	M	PM				Nuc		1.09687e+07	24	457030	0.471036	215278	0.0132781	0.00511563	0.0160813	0.00974363	0.0240412	0.0193108	64.2518	70.3045	231.325	174.897	101.046	102.959	148.926	164.955	193.103	144.646
sp|O60667|FAIM3_HUMAN	O60667	O60667	FCMR	Fas apoptotic inhibitory molecule 3	5	M				XC			7.84798e+06	17	461646	0.463441	213946	0.0131959	0.00472448	0.0194419	0.00745537	0.019918	0.0216106	76.9315	81.7295	345.373	266.159	100.041	99.1636	172.127	172.026	258.184	203.758
sp|P01859|IGHG2_HUMAN	P01859	P01859	IGHG2	Ig gamma-2 chain C region	2	M	PM			XC			6.4628e+06	13	497139	0.425642	211603	0.0130514	0.0152539	0.00922691	0.0220776	0.00691016	0.00745582	334.505	196.871	98.5085	94.2399	332.326	219.084	28.8508	44.5259	25.1157	52.4467
sp|P37173-2|TGFR2_HUMAN	P37173-2	P37173	TGFBR2	Isoform 2 of TGF-beta receptor type-2	4	M	PM						1.37132e+07	33	415551	0.508745	211410	0.0130395	0.00247095	0.0191438	0.00961246	0.0190217	0.0229218	35.1476	29.3847	175.316	180.161	77.6966	87.8918	90.9833	112.935	160.581	148.568
sp|P08185|CBG_HUMAN	P08185	P08185	SERPINA6	Corticosteroid-binding globulin	2					XC			7.18227e+06	17	422486	0.495712	209432	0.0129175	0.0210605	0.00815134	0.0187493	0.00429234	0.00457111	196.369	167.647	41.1671	51.349	111.002	114.754	14.6488	17.0586	13.8659	19.8321
sp|Q9Y490|TLN1_HUMAN	Q9Y490	Q9Y490	TLN1	Talin-1	32	M	PM		CS	XC			5.71825e+07	133	429944	0.485476	208727	0.012874	0.00391314	0.0191278	0.0141952	0.0181721	0.0135181	651.047	562.017	2267.43	2174.04	1670.37	1567.55	1093.5	1303.02	1381.25	1058.18
sp|P07900-2|HS90A_HUMAN	P07900-2	P07900	HSP90AA1	Isoform 2 of Heat shock protein HSP 90-alpha	8	M	PM			XC	Nuc		1.88555e+07	42	448940	0.463836	208235	0.0128437	0.0103534	0.0139134	0.015879	0.0134292	0.0110413	393.079	342.335	292.875	364.065	622.005	403.693	212.671	221.689	248.832	198.981
sp|Q12913|PTPRJ_HUMAN	Q12913	Q12913	PTPRJ	Receptor-type tyrosine-protein phosphatase eta	9	M	PM		CS				2.18867e+07	56	390833	0.52664	205829	0.0126953	0.00657107	0.0133172	0.0152726	0.0193897	0.0132605	170.964	187.87	287.068	301.309	289.623	335.732	213.951	276.768	214.344	206.634
sp|Q07065|CKAP4_HUMAN	Q07065	Q07065	CKAP4	Cytoskeleton-associated protein 4	7	M	PM						1.47627e+07	38	388493	0.519839	201954	0.0124563	0.00786641	0.00958277	0.0153221	0.0226302	0.0116874	419.173	277.804	228.708	267.812	362.709	416.041	214.685	399	239.315	224.958
sp|Q9UGM5|FETUB_HUMAN	Q9UGM5	Q9UGM5	FETUB	Fetuin-B	2					XC			6.01428e+06	15	400952	0.499886	200430	0.0123623	0.0185408	0.00566098	0.0147175	0.00748197	0.0119042	105.407	85.5185	28.8515	20.6633	48.5182	52.1945	11.2163	17.2294	11.6322	29.9262
sp|Q9UHW9|S12A6_HUMAN	Q9UHW9	Q9UHW9	SLC12A6	Solute carrier family 12 member 6	8	M	PM						1.94468e+07	48	405142	0.493538	199953	0.0123329	0.00815582	0.0146415	0.0123592	0.0128744	0.0161114	328.459	309.051	497.491	439.063	318.893	360.09	224.21	243.565	359.573	332.751
sp|P26006|ITA3_HUMAN	P26006	P26006	ITGA3	Integrin alpha-3	5	M	PM		CS				1.38732e+07	36	385366	0.517059	199257	0.0122899	0.00453318	0.0083223	0.00788503	0.0230192	0.0286684	96.5659	97.8996	162.211	142.232	110.048	130.93	231.851	248.194	292.897	337.444
sp|O95466-3|FMNL1_HUMAN	O95466-3	O95466	FMNL1	Isoform 3 of Formin-like protein 1	8	M	PM						2.31787e+07	58	399633	0.488596	195259	0.0120433	0.00442484	0.020098	0.0120085	0.0147754	0.011873	125.856	151.495	585.671	544.542	301.189	316.116	241.58	252.56	301.354	221.556
sp|P29966|MARCS_HUMAN	P29966	P29966	MARCKS	Myristoylated alanine-rich C-kinase substrate	2	M	PM						3.8612e+06	11	351018	0.550276	193157	0.0119137	0.00552246	0.0121515	0.0155774	0.0208388	0.00995075	102.144	76.5967	100.126	133.378	101.327	166.124	102.258	144.302	80.9312	75.2238
sp|P53680|AP2S1_HUMAN	P53680	P53680	AP2S1	AP-2 complex subunit sigma	1	M	PM						2.35249e+06	6	392082	0.488284	191447	0.0118082	0.0015002	0.0119783	0.00707093	0.031342	0.0192638	14.3264	5.85349	40.1022	36.9859	19.2196	21.2128	54.2454	61.0541	46.1489	40.9664
sp|O00391|QSOX1_HUMAN	O00391	O00391	QSOX1	Sulfhydryl oxidase 1	6	M				XC			1.575e+07	45	349999	0.538233	188381	0.0116191	0.0124834	0.00447508	0.0135028	0.0102879	0.0189682	638.011	732.875	239.412	207.909	671.65	609.508	278.92	301.542	281.467	606.94
sp|P33527|MRP1_HUMAN	P33527	P33527	ABCC1	Multidrug resistance-associated protein 1	7	M	PM						2.59743e+07	73	355813	0.523241	186176	0.0114831	0.00617533	0.0135887	0.00842193	0.0185139	0.0160425	143.299	213.249	372.1	371.347	216.341	223.613	268.029	319.19	302.595	301.94
sp|Q13835-2|PKP1_HUMAN	Q13835-2	Q13835	PKP1	Isoform 1 of Plakophilin-1	5	M	PM				Nuc		1.77145e+07	45	393656	0.466738	183734	0.0113325	0.0104101	0.00940185	0.0216827	0.00943078	0.00296886	439.284	257.166	191.402	183.801	465.76	411.841	35.2364	116.313	21.2384	39.9732
sp|P19338|NUCL_HUMAN	P19338	P19338	NCL	Nucleolin	7	M			CS		Nuc		1.35308e+07	35	386593	0.458831	177381	0.0109407	0.00695707	0.00866633	0.0127736	0.0181344	0.0123765	394.759	210.75	163.536	207.756	427.801	297.517	199.98	274.263	222.934	204.344
sp|O00481|BT3A1_HUMAN	O00481	O00481	BTN3A1	Butyrophilin subfamily 3 member A1	6	M	PM						9.16377e+06	25	366551	0.483905	177376	0.0109403	0.00898396	0.0182623	0.0110732	0.00715076	0.00718249	184.166	209.549	385.627	337.092	227.656	198.585	87.1897	83.2708	96.3552	91.3091
sp|P43652|AFAM_HUMAN	P43652	P43652	AFM	Afamin	8					XC			1.23747e+07	37	334450	0.523896	175217	0.0108072	0.0220492	0.00574026	0.0143444	0.00121352	0.00133566	881.708	967.955	142.48	199.421	495.781	484.176	16.4873	26.5969	17.6487	31.958
sp|P06241|FYN_HUMAN	P06241	P06241	FYN	Tyrosine-protein kinase Fyn	2	M	PM				Nuc		1.02336e+07	28	365484	0.477377	174474	0.0107613	0.00521969	0.0112903	0.00935776	0.0179744	0.0155336	48.2162	45.3584	92.4619	77.6418	55.3567	62.5234	82.2805	77.9812	90.709	73.5708
sp|P49908|SEPP1_HUMAN	P49908	P49908	SEPP1	Selenoprotein P	2					XC			6.12585e+06	17	360344	0.483009	174049	0.0107351	0.0123087	0.00856385	0.0129673	0.00750235	0.010813	126.48	96.3024	48.968	53.0237	90.454	78.0068	32.7542	29.3052	25.3916	46.1096
sp|P63167|DYL1_HUMAN	P63167	P63167	DYNLL1	Dynein light chain 1, cytoplasmic	1	M	PM				Nuc		1.53679e+06	5	307358	0.523932	161035	0.00993243	0.00778028	0.006923	0.0132479	0.0149787	0.00895108	173.692	131.626	73.0566	92.6869	130.926	172.326	79.2084	126.516	93.4761	82.5361
sp|Q9UK55|ZPI_HUMAN	Q9UK55	Q9UK55	SERPINA10	Protein Z-dependent protease inhibitor	3					XC			6.68251e+06	22	303750	0.513945	156111	0.00962874	0.0107408	0.00558473	0.0128602	0.00661508	0.0116621	278.67	265.648	102.615	109.308	274.095	244.555	79.4224	81.6825	77.0131	157.206
sp|P13747|HLAE_HUMAN	P13747	P13747	HLA-E	HLA class I histocompatibility antigen, alpha chain E	3	M	PM		CS				5.90551e+06	17	347383	0.446304	155038	0.00956257	0.00645131	0.0149954	0.0111659	0.00825692	0.00631695	82.7464	74.7121	177.062	137.429	118.723	99.4248	53.1816	47.7402	63.5168	39.8723
sp|P49961-6|ENTP1_HUMAN	P49961-6	P49961	ENTPD1	Isoform 6 of Ectonucleoside triphosphate diphosphohydrolase 1	2	M	PM						5.96237e+06	19	313809	0.493979	155015	0.00956114	0.00771657	0.00725244	0.00801612	0.0173948	0.0113015	154.608	159.623	103.841	118.723	150.14	127.495	171.856	179.645	149.837	127.417
sp|P05362|ICAM1_HUMAN	P05362	P05362	ICAM1	Intercellular adhesion molecule 1	2	M	PM		CS	XC			6639189	22	301781	0.51095	154195	0.00951058	0.00452649	0.00588887	0.00713453	0.0198363	0.0178071	73.4927	79.6761	85.2122	82.0306	92.2168	96.5584	149.42	174.322	177.218	170.837
sp|P16871|IL7RA_HUMAN	P16871	P16871	IL7R	Interleukin-7 receptor subunit alpha	4	M	PM			XC			4.8723e+06	15	324820	0.474659	154179	0.00950957	0.0037239	0.014598	0.00980906	0.0111168	0.0108419	69.4428	93.2124	346.91	289.165	199.12	188.782	117.906	138.924	216.228	147.912
sp|P08603|CFAH_HUMAN	P08603	P08603	CFH	Complement factor H	13					XC			1.87392e+07	61	307201	0.491099	150866	0.00930523	0.0156964	0.00594127	0.0129677	0.00267134	0.0033734	1370.67	1140.85	249.721	341.73	709.866	724.681	93.9676	96.9346	101.968	133.634
sp|P21926|CD9_HUMAN	P21926	P21926	CD9	CD9 antigen	1	M	PM			XC			1.83821e+06	6	306368	0.484525	148443	0.0091558	0.00720711	0.00825693	0.0116464	0.0143819	0.0057356	39.7196	24.9438	18.4998	22.6151	27.9219	30.9922	18.2039	24.8509	17.1722	10.8194
sp|O94804|STK10_HUMAN	O94804	O94804	STK10	Serine/threonine-protein kinase 10	6	M	PM						1.35117e+07	45	300260	0.485196	145685	0.00898568	0.00228279	0.0133837	0.00534646	0.0168292	0.0128471	44.8996	63.2145	303.915	293.295	101.43	113.835	247.558	232.668	253.841	193.9
sp|Q15743|OGR1_HUMAN	Q15743	Q15743	GPR68	Ovarian cancer G-protein coupled receptor 1	1	M	PM						3.06772e+06	11	278883	0.511814	142736	0.00880381	0.00299923	0.00464873	0.00390258	0.0246607	0.0178758	31.7344	41.0061	53.0298	50.298	34.242	41.025	121.513	168.333	173.32	133.207
sp|Q10589|BST2_HUMAN	Q10589	Q10589	BST2	Bone marrow stromal antigen 2	2	M	PM		CS				4327937	10	432794	0.328561	142199	0.00877067	0.0194667	0.00950128	0.00601981	0	0	374.819	193.324	149.987	74.6713	116.797	45.9659	0	0	0	0
sp|Q00839|HNRPU_HUMAN	Q00839	Q00839	HNRNPU	Heterogeneous nuclear ribonucleoprotein U	10	M			CS		Nuc		9.65452e+06	33	292561	0.479643	140325	0.00865508	0.00538112	0.00940599	0.0110952	0.0117258	0.00731662	619.333	365.077	407.781	505.003	608.22	578.767	386.271	397.173	274.626	270.548
sp|O43707|ACTN4_HUMAN	O43707	O43707	ACTN4	Alpha-actinin-4	9					XC	Nuc		1.42841e+07	55	259712	0.536299	139283	0.00859081	0.0116104	0.00510856	0.00942178	0.0102548	0.00541033	1204.21	1375.22	470.822	478.852	709.204	858.059	376.221	606.421	410.862	349.278
sp|Q53RT3|APRV1_HUMAN	Q53RT3	Q53RT3	ASPRV1	Retroviral-like aspartic protease 1	1	M						ShG	2.71907e+06	11	247188	0.560188	138472	0.00854077	0.00308516	0.00322111	0.0101631	0.0225496	0.0111534	184.91	85.5647	127.17	70.6968	203.853	216.721	69.3799	312.234	85.0271	168.596
sp|P49795|RGS19_HUMAN	P49795	P49795	RGS19	Regulator of G-protein signaling 19	1	M	PM						3.10311e+06	12	258593	0.516336	133521	0.0082354	0.00801107	0.00559806	0.00531444	0.0135135	0.0117621	31.5789	41.2221	24.8015	22.7958	22.9734	21.0259	31.3818	34.716	32.3459	32.9872
sp|P09104|ENOG_HUMAN	P09104	P09104	ENO2	Gamma-enolase	2	M	PM			XC			5.01288e+06	20	250644	0.511218	128134	0.00790312	0.00347836	0.00579071	0.0122639	0.0137109	0.0076168	57.9543	48.1117	77.916	63.3848	142.864	130.426	45.9439	94.6818	52.0541	57.4209
sp|Q9UIG8|SO3A1_HUMAN	Q9UIG8	Q9UIG8	SLCO3A1	Solute carrier organic anion transporter family member 3A1	2	M	PM						5.09746e+06	19	268288	0.475734	127633	0.00787228	0.00463464	0.0108991	0.00565915	0.0108472	0.00981474	27.7617	34.1323	71.833	63.5209	43.1534	32.0449	33.6354	39.8832	53.9126	39.3958
sp|P49913|CAMP_HUMAN	P49913	P49913	CAMP	Cathelicidin antimicrobial peptide	1					XC			1.95135e+06	9	216817	0.578635	125458	0.00773808	0.00814857	0.00628384	0.00617382	0.01194	0.00745418	30.0068	73.1739	29.8167	44.6557	41.5291	42.6273	41.722	53.5306	39.3197	36.4835
sp|P62158|CALM_HUMAN	P62158	P62158	CALM1	Calmodulin	1	M	PM			XC	Nuc		2.17268e+06	9	241409	0.51742	124910	0.00770428	0.00708981	0.00606385	0.00978546	0.00951391	0.00661993	56.134	44.615	20.7113	30.1975	43.3948	47.3463	26.209	29.8902	16.5378	22.705
sp|P04217|A1BG_HUMAN	P04217	P04217	A1BG	Alpha-1B-glycoprotein	2					XC			3.54633e+06	15	236422	0.528194	124877	0.00770224	0.00837882	0.00489922	0.00791961	0.00838757	0.00959632	70.5266	69.5019	27.1242	32.1601	42.8356	50.5098	28.8863	34.7355	36.3348	43.3851
sp|O14672|ADA10_HUMAN	O14672	O14672	ADAM10	Disintegrin and metalloproteinase domain-containing protein 10	3	M	PM		CS		Nuc		9.46435e+06	40	236609	0.524931	124203	0.00766071	0.00668101	0.00872777	0.00499612	0.00986378	0.00964982	97.859	168.894	211.915	174.603	81.1519	97.1098	109.185	124.491	131.637	132.957
sp|O15438-4|MRP3_HUMAN	O15438-4	O15438	ABCC3	Isoform 4 of Canalicular multispecific organic anion transporter 2	2	M	PM						1.54776e+07	63	245677	0.500584	122982	0.00758537	0.00292546	0.00982976	0.00555484	0.0134952	0.0103274	72.6151	63.3732	147.143	168.512	108.556	92.5212	139.314	145.954	123.284	121.934
sp|O00299|CLIC1_HUMAN	O00299	O00299	CLIC1	Chloride intracellular channel protein 1	3	M	PM			XC	Nuc		3.54577e+06	15	236385	0.518544	122576	0.00756033	0.00410997	0.0091874	0.00871783	0.00844473	0.00908546	71.9958	82.8544	142.712	146.57	120.085	135.127	68.2956	84.9936	106.993	99.8264
sp|Q14699|RFTN1_HUMAN	Q14699	Q14699	RFTN1	Raftlin	2	M	PM						7.22129e+06	28	257903	0.472878	121957	0.00752214	0.00187439	0.0107575	0.0060797	0.0124539	0.0107041	31.9373	25.4893	144.325	115.767	61.6635	63.5678	82.756	84.5521	90.3262	79.3357
sp|P05161|ISG15_HUMAN	P05161	P05161	ISG15	Ubiquitin-like protein ISG15	2					XC			2.96911e+06	9	329901	0.367617	121277	0.00748024	0.00929244	0.00216367	0.0140053	0.00465606	0.0052568	37.176	81.2565	132.036	14.9726	59.1272	94.1625	75.5021	20.3268	101.739	25.0537
sp|P08238|HS90B_HUMAN	P08238	P08238	HSP90AB1	Heat shock protein HSP 90-beta	4	M	PM		CS				8.62104e+06	35	246315	0.491869	121155	0.00747268	0.00529952	0.00685578	0.00895619	0.0105568	0.00743779	352.735	265.892	211.874	272.21	390.316	345.502	225.507	264.438	215.683	203.392
sp|Q9UIQ6|LCAP_HUMAN	Q9UIQ6	Q9UIQ6	LNPEP	Leucyl-cystinyl aminopeptidase	7	M	PM			XC			1.34937e+07	51	264582	0.455398	120490	0.0074317	0.00872992	0.00595981	0.00635342	0.0089531	0.00731441	213.863	241.924	169.063	130.701	161.954	135.374	147.038	123.87	195.839	110.477
sp|P30041|PRDX6_HUMAN	P30041	P30041	PRDX6	Peroxiredoxin-6	1	M				XC			3362007	15	224134	0.525748	117838	0.0072681	0.00668462	0.0055405	0.00901284	0.0104993	0.00542589	126.809	109.255	56.3339	71.6626	96.5672	113.262	54.9365	85.674	51.6027	48.3347
sp|Q9Y3Z3|SAMH1_HUMAN	Q9Y3Z3	Q9Y3Z3	SAMHD1	Deoxynucleoside triphosphate triphosphohydrolase SAMHD1	3	M	PM				Nuc		8.61633e+06	35	246181	0.473763	116631	0.00719368	0.00079125	0.0147177	0.00977283	0.00629804	0.00519795	31.9568	21.006	337.738	309.205	171.228	199.484	128.456	83.4753	95.2484	75.2113
sp|Q8TDL5|BPIB1_HUMAN	Q8TDL5	Q8TDL5	BPIFB1	BPI fold-containing family B member 1	4					XC			5.41643e+06	25	216657	0.536099	116150	0.00716397	0.00883312	0.00401803	0.007431	0.00932463	0.0063134	179.968	185.368	58.4167	66.7285	115.01	119.902	62.4728	97.6958	53.0588	72.2113
sp|P07996|TSP1_HUMAN	P07996	P07996	THBS1	Thrombospondin-1	5	M	PM		CS	XC			1.09051e+07	61	178773	0.625238	111776	0.00689418	0.00402996	0.00585896	0.00826617	0.0163178	0.00308481	374.805	423.26	467.958	486.972	219.972	667.526	317.103	855.638	184.563	176.586
sp|P42892|ECE1_HUMAN	P42892	P42892	ECE1	Endothelin-converting enzyme 1	6	M	PM						1.541e+07	41	375855	0.294951	110859	0.00683764	0.00375308	0.00767947	0.00676433	0.0100873	0.00840143	165.79	86.7729	516.992	140.509	286.557	120.248	188.86	116.438	203.935	105.869
sp|O14626|GP171_HUMAN	O14626	O14626	GPR171	Probable G-protein coupled receptor 171	2	M	PM						3.89276e+06	15	259517	0.426213	110610	0.00682227	0.0041823	0.00472579	0.00452758	0.0132215	0.0120853	40.7101	27.927	39.9107	24.9724	29.6468	23.2452	47.2972	44.0772	63.4961	43.9834
sp|Q06033|ITIH3_HUMAN	Q06033	Q06033	ITIH3	Inter-alpha-trypsin inhibitor heavy chain H3	2					XC			6.53733e+06	35	186781	0.587199	109678	0.00676478	0.00409716	0.00208512	0.0100067	0.00519248	0.0153207	114.097	115.095	84.3321	46.3532	174.154	216.134	49.0385	72.8233	59.916	234.57
sp|P28907|CD38_HUMAN	P28907	P28907	CD38	ADP-ribosyl cyclase/cyclic ADP-ribose hydrolase 1	5	M	PM		CS		Nuc		4.36001e+06	20	218000	0.498036	108572	0.0066966	0.00632079	0.0112556	0.00624225	0.00452595	0.00339583	107.344	123.189	184.3	173.599	94.9632	93.5406	38.8529	44.0386	48.6902	36.0718
sp|Q8NE01|CNNM3_HUMAN	Q8NE01	Q8NE01	CNNM3	Metal transporter CNNM3	3	M	PM						7.94506e+06	37	214731	0.500699	107516	0.00663145	0.00185078	0.00679751	0.00467524	0.0125307	0.0125176	83.205	60.2956	191.061	175.25	108.398	117.11	152.296	203.812	241.599	222.266
sp|Q14644|RASA3_HUMAN	Q14644	Q14644	RASA3	Ras GTPase-activating protein 3	5	M	PM						1.02984e+07	48	214549	0.495768	106367	0.00656057	0.0014833	0.0126714	0.00730689	0.00628452	0.00620341	56.1395	44.2576	308.376	299.199	135.874	167.629	81.537	93.6167	135.703	100.881
sp|Q9UIW2|PLXA1_HUMAN	Q9UIW2	Q9UIW2	PLXNA1	Plexin-A1	8	M	PM				Nuc		18531687	88	210587	0.497203	104705	0.00645806	0.00236437	0.00762648	0.00476891	0.0109311	0.010558	137.785	142.934	385.875	364.856	219.55	221.665	272.81	329.919	407.06	347.873
sp|O15117-3|FYB_HUMAN	O15117-3	O15117	FYB	Isoform 3 of FYN-binding protein	2	M	PM				Nuc		5916367	27	219125	0.475426	104178	0.00642555	0.00195702	0.00926474	0.00600354	0.00979447	0.00801121	25.6853	21.5277	83.4241	80.6516	54.3136	50.7771	57.9178	53.7906	59.7749	48.0311
sp|Q9P1W8|SIRPG_HUMAN	Q9P1W8	Q9P1W8	SIRPG	Signal-regulatory protein gamma	2	M	PM						4417073	21	210337	0.493615	103825	0.00640383	0.0100032	0.00555502	0.00381482	0.00501023	0.00596128	71.3375	75.2091	31.4311	33.0519	30.9332	22.0529	19.9938	18.8068	24.3429	24.4284
sp|Q13642-4|FHL1_HUMAN	Q13642-4	Q13642	FHL1	Isoform 4 of Four and a half LIM domains protein 1	2	M	PM				Nuc		3.44359e+06	18	191311	0.539012	103119	0.00636024	0.00477893	0.00450867	0.00843623	0.0101064	0.00558977	185.636	180.904	103.534	135.065	197.559	245.541	123.723	191.002	131.765	115.327
sp|P02763|A1AG1_HUMAN	P02763	P02763	ORM1	Alpha-1-acid glycoprotein 1	3					XC			2.24792e+06	10	224792	0.455543	102402	0.00631605	0.00795028	0.00654525	0.0111458	0.00109086	0.000957805	150.441	106.683	84.1358	69.5051	120.731	114.996	5.82246	7.30814	3.99494	7.00507
sp|P20645|MPRD_HUMAN	P20645	P20645	M6PR	Cation-dependent mannose-6-phosphate receptor	3	M	PM						2.80216e+06	15	186811	0.528093	98653.5	0.00608483	0.0163332	0.00453951	0.00248622	0	0.000175584	344.128	455.656	72.1638	100.219	121.536	53.3289	6.47939	0	2.46682	2.66975
sp|P00450|CERU_HUMAN	P00450	P00450	CP	Ceruloplasmin	5	M				XC			8.22299e+06	46	178761	0.540512	96622.4	0.00595955	0.00462572	0.00375788	0.00546761	0.00860363	0.00987552	238.888	238.002	162.809	153.011	193.745	216.3	176.579	221.007	167.555	276.939
sp|O95977|S1PR4_HUMAN	O95977	O95977	S1PR4	Sphingosine 1-phosphate receptor 4	1	M	PM						3181328	17	187137	0.50883	95221	0.00587311	0.00388831	0.00411423	0.00288346	0.0117605	0.0108932	15.6354	21.5652	25.0334	18.0575	10.2565	12.296	25.0404	32.5643	37.3704	32.9283
sp|P13667|PDIA4_HUMAN	P13667	P13667	PDIA4	Protein disulfide-isomerase A4	4				CS				7304971	38	192236	0.489092	94021.1	0.00579911	0.00427385	0.00408813	0.0069642	0.0104562	0.00517226	222.679	141.203	115.444	106.887	168.05	176.91	117.029	172.473	98.2151	93.1377
sp|P09211|GSTP1_HUMAN	P09211	P09211	GSTP1	Glutathione S-transferase P	2					XC	Nuc		1.76897e+06	10	176897	0.500663	88565.6	0.00546262	0.0044051	0.00461582	0.00701259	0.00792341	0.00419174	156.494	120.086	96.3178	99.5776	136.427	146.985	74.9957	107.838	71.1098	62.2804
sp|P56199|ITA1_HUMAN	P56199	P56199	ITGA1	Integrin alpha-1	2	M	PM		CS				9.39458e+06	54	173974	0.507514	88294.1	0.00544588	0.00385398	0.0042462	0.00427005	0.0107394	0.00691829	67.1457	71.7472	59.5429	62.5565	55.9557	61.1204	87.1548	99.8158	84.8158	70.1965
sp|P08123|CO1A2_HUMAN	P08123	P08123	COL1A2	Collagen alpha-2(I) chain	3					XC			1.35532e+07	68	199312	0.435872	86874.6	0.00535832	0.00209346	0.00430945	0.00910233	0.00980405	0.00351741	196.09	64.5963	389.177	105.231	109.032	215.951	39.1292	151.033	37.9019	59.1547
sp|P21709|EPHA1_HUMAN	P21709	P21709	EPHA1	Ephrin type-A receptor 1	6	M	PM						7.25831e+06	43	168798	0.512778	86555.9	0.00533866	0.00199807	0.00833842	0.00395592	0.00508469	0.0092956	58.8494	73.9801	235.374	244.324	102.46	112.619	71.6606	93.9925	208.648	187.588
sp|Q9H400|LIME1_HUMAN	Q9H400	Q9H400	LIME1	Lck-interacting transmembrane adapter 1	1	M	PM			XC			2070893	13	159299	0.499462	79564.1	0.00490742	0.001112	0.00544364	0.00295872	0.00850022	0.0105505	44.1498	42.2567	140.278	163.704	83.4294	86.4479	172.796	161.267	232.987	218.518
sp|Q8NBI5-2|S43A3_HUMAN	Q8NBI5-2	Q8NBI5	SLC43A3	Isoform 2 of Solute carrier family 43 member 3	2	M						ShG	2.40044e+06	15	160029	0.492931	78883.2	0.00486542	0.00643367	0.00513512	0.0034944	0.00354845	0.00473695	112.499	119.826	80.2266	75.6867	59.8123	50.0406	35.1192	32.9954	48.345	48.0852
sp|O75131|CPNE3_HUMAN	O75131	O75131	CPNE3	Copine-3	2	M	PM				Nuc		4.27942e+06	26	164593	0.473648	77959.1	0.00480842	0.0021058	0.00702327	0.00585943	0.00449104	0.00535927	57.9347	27.6141	71.0812	72.8838	59.1853	59.0783	29.1103	29.4025	35.2618	38.3038
sp|Q8IYL9|PSYR_HUMAN	Q8IYL9	Q8IYL9	GPR65	Psychosine receptor	1	M	PM						1.8578e+06	12	154817	0.501021	77566.4	0.00478421	0.00147642	0.00354907	0.00516273	0.00945824	0.0078311	20.9672	17.0491	38.6838	32.4326	37.9473	45.8383	42.3423	54.5286	58.3833	49.2873
sp|P02452|CO1A1_HUMAN	P02452	P02452	COL1A1	Collagen alpha-1(I) chain	8					XC			1.29756e+07	70	185366	0.413993	76740.3	0.00473325	0.00314037	0.00485568	0.00669691	0.00773559	0.00195773	588.652	303.621	1314.67	371.517	268.908	497.833	79.9074	373.395	82.7684	103.163
sp|Q9H665|IGFR1_HUMAN	Q9H665	Q9H665	IGFLR1	IGF-like family receptor 1	2	M	PM						2.11792e+06	14	151280	0.506158	76571.6	0.00472284	0.00311655	0.00483213	0.00294967	0.00773273	0.00725564	30.121	43.9917	53.92	53.9773	37.2586	32.013	43.7224	54.4944	69.4276	55.8205
sp|P22792|CPN2_HUMAN	P22792	P22792	CPN2	Carboxypeptidase N subunit 2	2					XC			3.24476e+06	22	147489	0.518152	76421.7	0.0047136	0.00508143	0.00332414	0.00596403	0.00336974	0.00552317	249.915	269.157	130.111	139.34	326.73	242.894	68.601	89.1124	61.5429	159.452
sp|P78536|ADA17_HUMAN	P78536	P78536	ADAM17	Disintegrin and metalloproteinase domain-containing protein 17	3	M	PM		CS				6.731e+06	44	152977	0.499052	76343.5	0.00470878	0.00188768	0.00430778	0.0021765	0.00921731	0.00990945	26.2688	30.2671	54.9403	54.6603	31.8569	26.8323	62.9702	73.7851	97.1419	86.5989
sp|Q15438|CYH1_HUMAN	Q15438	Q15438	CYTH1	Cytohesin-1	2	M	PM						3.41173e+06	21	162463	0.454632	73861	0.00455566	0.000860861	0.00683571	0.00359856	0.00829187	0.00595191	24.2648	26.2536	208.304	164.975	89.6955	84.3807	140.499	126.25	137.977	98.9315
sp|P04278|SHBG_HUMAN	P04278	P04278	SHBG	Sex hormone-binding globulin	2					XC			2.84555e+06	21	135502	0.53196	72081.8	0.00444592	0.00451424	0.001714	0.00662925	0.00275897	0.00675246	126.085	106.7	42.462	32.0603	100.577	120.476	33.0598	32.5574	31.0849	86.9887
sp|P33241-3|LSP1_HUMAN	P33241-3	P33241	LSP1	Isoform 3 of Lymphocyte-specific protein 1	1	M	PM						2.13349e+06	14	152392	0.469881	71606.1	0.00441658	0.00099038	0.00641251	0.0040071	0.00683148	0.00617035	12.4923	11.3394	56.1702	58.1021	37.6869	35.2756	54.7184	39.0503	44.5714	38.5051
sp|P08183|MDR1_HUMAN	P08183	P08183	ABCB1	Multidrug resistance protein 1	6	M	PM		CS				8.99829e+06	64	140598	0.508826	71540	0.0044125	0.00263584	0.00609029	0.00456584	0.0038744	0.00551276	93.0273	109.43	168.298	200.094	154.598	145.746	77.0828	80.3059	144.406	124.741
sp|P51148-2|RAB5C_HUMAN	P51148-2	P51148	RAB5C	Isoform 2 of Ras-related protein Rab-5C	2	M	PM						1.84155e+06	12	153462	0.465808	71484.1	0.00440905	0.000549204	0.00417651	0.00226669	0.0111275	0.00869663	19.8828	14.1865	103.769	85.3755	42.6717	45.0187	143.786	143.504	160.68	122.438
sp|Q8TD46-4|MO2R1_HUMAN	Q8TD46-4	Q8TD46	CD200R1	Isoform 4 of Cell surface glycoprotein CD200 receptor 1	1	M	PM			XC			2.51556e+06	18	139754	0.511454	71477.5	0.00440864	0.00248671	0.00445032	0.00297476	0.00870641	0.00596038	122.935	110.874	170.575	157.027	105.313	101.98	135.601	193.806	142.373	144.844
sp|P13473-2|LAMP2_HUMAN	P13473-2	P13473	LAMP2	Isoform LAMP-2B of Lysosome-associated membrane glycoprotein 2	2	M	PM			XC			2.53236e+06	18	140686	0.507638	71417.8	0.00440496	0.00641599	0.00371599	0.00553465	0.00325809	0.00117247	220.012	221.551	92.954	101.546	129.726	146.946	29.1324	56.169	59.9554	22.0665
sp|P20020|AT2B1_HUMAN	P20020	P20020	ATP2B1	Plasma membrane calcium-transporting ATPase 1	5	M	PM				Nuc		7.38248e+06	52	141971	0.501935	71260.2	0.00439524	0.00211087	0.00453336	0.00573328	0.00663695	0.00444496	106.528	100.077	163.297	170.087	143.866	208.994	140.013	157.096	191.617	114.858
sp|Q9Y666|S12A7_HUMAN	Q9Y666	Q9Y666	SLC12A7	Solute carrier family 12 member 7	3	M	PM						5.97601e+06	43	138977	0.510753	70982.9	0.00437814	0.00289388	0.00516897	0.00248561	0.00303638	0.00985199	57.3437	124.802	278.968	176.41	78.0331	82.42	92.107	65.3763	145.473	231.572
sp|P41240|CSK_HUMAN	P41240	P41240	CSK	Tyrosine-protein kinase CSK	2	M	PM						3.94217e+06	27	146006	0.48211	70391	0.00434163	0.000619609	0.00532757	0.00393508	0.00810813	0.00686246	7.29161	7.24682	56.33	49.3101	29.69	35.3868	44.1253	47.3449	59.1813	43.7453
sp|Q9UHG3|PCYOX_HUMAN	Q9UHG3	Q9UHG3	PCYOX1	Prenylcysteine oxidase 1	2	M	PM						3.04682e+06	23	132471	0.517873	68602.9	0.00423134	0.00227107	0.00216864	0.00190504	0.00989002	0.00892125	23.4621	36.255	26.5695	27.3969	27.5582	23.3829	68.0456	78.8239	81.0393	77.622
sp|P00742|FA10_HUMAN	P00742	P00742	F10	Coagulation factor X	1	M	PM			XC			2.9078e+06	24	121158	0.565537	68519.7	0.00422621	0.00174415	0.00185573	0.00413273	0.00829333	0.00862837	11.6131	11.7185	7.27341	9.8669	13.4391	21.3494	22.2727	27.819	24.0303	31.5965
sp|O43493|TGON2_HUMAN	O43493	O43493	TGOLN2	Trans-Golgi network integral membrane protein 2	2	M	PM						3.15435e+06	25	126174	0.534465	67435.6	0.00415934	0.00764548	0.002439	0.00204262	0.0041828	0.0032256	88.9063	124.178	15.1804	31.3493	35.6281	25.5084	40.35	33.9179	32.0373	28.5543
sp|P19634|SL9A1_HUMAN	P19634	P19634	SLC9A1	Sodium/hydrogen exchanger 1	2	M	PM		CS				2.90256e+06	21	138217	0.48292	66747.8	0.00411693	0.00137557	0.00526754	0.00244157	0.00614428	0.00798233	26.3864	26.5716	94.2687	80.5228	37.4625	36.2628	57.5465	59.2555	91.2647	84.0399
sp|Q9NV96|CC50A_HUMAN	Q9NV96	Q9NV96	TMEM30A	Cell cycle control protein 50A	1	M	PM						1.86847e+06	15	124565	0.522534	65089.3	0.00401463	0.00137937	0.00423974	0.00290239	0.00686089	0.00748466	9.06089	9.49189	13.3419	23.0881	16.1653	15.3563	22.6117	23.5709	29.8105	28.0715
sp|Q92930|RAB8B_HUMAN	Q92930	Q92930	RAB8B	Ras-related protein Rab-8B	2	M	PM						1.50745e+06	12	125621	0.5064	63614.3	0.00392366	0.00114453	0.00391119	0.00383435	0.00670809	0.00661618	5.19466	13.3304	39.796	36.0496	36.1223	34.3371	39.951	39.0065	39.4957	41.9995
sp|P07384|CAN1_HUMAN	P07384	P07384	CAPN1	Calpain-1 catalytic subunit	4	M	PM						4.42291e+06	36	122859	0.510192	62681.5	0.00386612	0.00221965	0.00436004	0.00628331	0.00331616	0.00326365	105.871	83.9031	116.638	130.425	160.093	182.616	52.5549	62.5823	70.5636	67.2386
sp|P08754|GNAI3_HUMAN	P08754	P08754	GNAI3	Guanine nucleotide-binding protein G(k) subunit alpha	2	M	PM						2.13602e+06	15	142402	0.439724	62617.5	0.00386217	0.00199691	0.00532581	0.00514332	0.00418115	0.00305981	40.8428	26.7017	109.06	56.3563	40.1939	52.8787	22.7131	27.9125	24.3718	22.2995
sp|Q09666|AHNK_HUMAN	Q09666	Q09666	AHNAK	Neuroblast differentiation-associated protein AHNAK	28	M	PM				Nuc		4.63702e+07	377	122998	0.505328	62154.3	0.00383361	0.00262815	0.00303695	0.00496386	0.00589961	0.00371508	2433.48	1558.71	1210.27	1425.38	2073.49	2263.56	1128.1	1746.87	1177.23	1200.89
sp|Q14315|FLNC_HUMAN	Q14315	Q14315	FLNC	Filamin-C	6	M	PM						1.60951e+07	143	112553	0.529599	59608	0.00367655	0.00284889	0.00361003	0.00468253	0.00486797	0.00278118	503.284	502.633	413.449	504.038	539.827	635.205	321.805	428.792	298.389	267.44
sp|Q9BX67|JAM3_HUMAN	Q9BX67	Q9BX67	JAM3	Junctional adhesion molecule C	1	M	PM			XC			1.54778e+06	14	110556	0.528615	58441.5	0.0036046	0.00210095	0.00420426	0.00210545	0.00620319	0.00522727	6.93823	14.3805	23.4584	22.7733	5.02461	11.0805	21.9751	21.1981	21.9088	19.5009
sp|A0FGR8-2|ESYT2_HUMAN	A0FGR8-2	A0FGR8	ESYT2	Isoform 2 of Extended synaptotagmin-2	3	M	PM						4.77175e+06	42	113613	0.5122	58192.6	0.00358925	0.00130895	0.00630194	0.00719257	0.00100235	0.00112071	57.1859	50.5871	191.903	192.738	190.71	213.726	16.0661	19.3402	20.315	23.6064
sp|Q96RT1-8|ERBIN_HUMAN	Q96RT1-8	Q96RT1	ERBIN	Isoform 8 of Erbin	5	M	PM				Nuc		9252662	80	115658	0.500912	57934.6	0.00357334	0.000562022	0.0052045	0.00243717	0.00496018	0.00706242	28.8347	26.4648	203.315	193.942	56.8333	88.2386	102.84	116.61	212.479	181.255
sp|P23634|AT2B4_HUMAN	P23634	P23634	ATP2B4	Plasma membrane calcium-transporting ATPase 4	3	M	PM						6.67503e+06	57	117106	0.484397	56725.6	0.00349877	0.00170885	0.004657	0.00339037	0.00470741	0.00414692	91.6202	90.3158	208.423	194.78	140.776	137.774	118.675	124.213	149.984	119.456
sp|Q9H0X4|F234A_HUMAN	Q9H0X4	Q9H0X4	FAM234A	Protein FAM234A	1	M			CS				2.07395e+06	19	109156	0.509555	55620.8	0.00343062	0.00164909	0.00277823	0.00170532	0.00762826	0.00623537	15.8727	22.1647	31.027	29.5504	17.764	17.6231	42.5637	51.1879	52.7428	45.6775
sp|Q9NP59|S40A1_HUMAN	Q9NP59	Q9NP59	SLC40A1	Solute carrier family 40 member 1	1	M	PM						1.35148e+06	14	96534.6	0.56081	54137.5	0.00333914	0.0068824	0.00112553	0.00198645	0.00250355	0.00272585	49.2797	69.2319	8.85422	8.95981	11.3643	15.3639	11.6522	12.5732	13.6666	14.9448
sp|P48960|CD97_HUMAN	P48960	P48960	CD97	CD97 antigen	2	M	PM			XC			3.45913e+06	31	111585	0.481767	53757.9	0.00331572	0.00366158	0.00410207	0.00279769	0.00304853	0.00251497	105.944	139.242	142.946	123.447	89.7939	81.8007	67.8436	57.878	82.368	52.126
sp|Q9H2H9|S38A1_HUMAN	Q9H2H9	Q9H2H9	SLC38A1	Sodium-coupled neutral amino acid transporter 1	2	M	PM						1.66235e+06	17	97785.1	0.549186	53702.2	0.00331228	0.00303777	0.00543273	0.00346517	0.00189149	0.00182293	47.0894	60.1547	65.3146	85.1354	47.7109	52.759	14.6285	18.7	19.3317	19.6746
sp|P07602-3|SAP_HUMAN	P07602-3	P07602	PSAP	Isoform Sap-mu-9 of Prosaposin	3	M				XC			3.34534e+06	29	115356	0.460665	53140.7	0.00327765	0.002023	0.00263314	0.00391062	0.00592963	0.00319325	220.77	95.0796	82.39	97.936	177.252	141.317	81.7097	139.137	87.9716	81.7985
sp|P35580-4|MYH10_HUMAN	P35580-4	P35580	MYH10	Isoform 4 of Myosin-10	7	M	PM				Nuc		1.12281e+07	103	109010	0.485723	52948.9	0.00326583	0.00217562	0.00258651	0.00401875	0.00549362	0.00314958	322.405	288.669	232.749	271.587	395.146	409.983	483.64	363.914	219.798	227.768
sp|P08887|IL6RA_HUMAN	P08887	P08887	IL6R	Interleukin-6 receptor subunit alpha	1	M	PM		CS	XC			1.55984e+06	17	91755.4	0.575327	52789.4	0.00325598	0.0030972	0.00665609	0.00438521	0	0	21.1638	41.5037	58.3725	70.5852	36.5521	45.1821	0	0	0	0
sp|P61106|RAB14_HUMAN	P61106	P61106	RAB14	Ras-related protein Rab-14	1	M	PM						1.61382e+06	15	107588	0.482005	51858.1	0.00319854	0.00187232	0.0037192	0.00344739	0.00432066	0.00349694	16.2272	15.3814	25.5073	24.1792	22.4755	21.7753	19.0121	17.721	18.5644	15.6576
sp|Q6UWB1|I27RA_HUMAN	Q6UWB1	Q6UWB1	IL27RA	Interleukin-27 receptor subunit alpha	3	M	PM						2.73842e+06	25	109537	0.473324	51846.5	0.00319783	0.000854319	0.00447932	0.00288419	0.00429704	0.00507248	29.9752	21.6047	90.6858	89.6431	52.3099	56.0802	50.599	54.2525	100.782	69.9149
sp|Q9NX76|CKLF6_HUMAN	Q9NX76	Q9NX76	CMTM6	CKLF-like MARVEL transmembrane domain-containing protein 6	1	M				XC			651717	6	108620	0.476539	51761.5	0.00319259	0.00293627	0.00580605	0.00517221	0	0	20.5101	25.7027	43.9457	40.22	46.1967	34.8112	0	0	0	0
sp|P18206|VINC_HUMAN	P18206	P18206	VCL	Vinculin	6	M	PM			XC			6.94593e+06	74	93863.9	0.535609	50274.4	0.00310086	0.0023757	0.00213044	0.00385457	0.00560171	0.00248631	190.922	235.579	146.203	167.182	196.843	293.886	201.018	277.325	225.986	134.376
sp|Q99497|PARK7_HUMAN	Q99497	Q99497	PARK7	Protein deglycase DJ-1	1	M	PM				Nuc		1199430	12	99952.5	0.501126	50088.8	0.00308942	0.00111714	0.00362991	0.00408644	0.00527609	0.00251377	10.0905	11.8722	32.7251	30.5279	32.1499	33.3908	23.8757	27.9936	18.9716	14.5603
sp|P12109|CO6A1_HUMAN	P12109	P12109	COL6A1	Collagen alpha-1(VI) chain	2	M				XC			4.91339e+06	49	100273	0.490691	49203.2	0.00303479	0.00180223	0.00226417	0.00401375	0.00496823	0.00326309	166.11	74.6843	72.3209	74.2516	99.1021	127.888	56.127	102.789	76.8528	73.7005
sp|P32241-2|VIPR1_HUMAN	P32241-2	P32241	VIPR1	Isoform Long of Vasoactive intestinal polypeptide receptor 1	1	M	PM						2.08744e+06	24	86976.6	0.557213	48464.5	0.00298923	0.000971242	0.00327665	0.00171626	0.00444078	0.00674059	0	9.2575	23.6672	24.7158	7.87861	12.5779	12.9163	21.1324	37.1488	35.0176
sp|P12821|ACE_HUMAN	P12821	P12821	ACE	Angiotensin-converting enzyme	5	M	PM			XC			5.20847e+06	54	96453.1	0.501238	48345.9	0.00298192	0.00179937	0.00255383	0.00188206	0.00534301	0.00516197	89.7676	114.947	127.993	129.105	87.8459	92.4413	163.811	170.406	213.818	179.727
sp|P13010|XRCC5_HUMAN	P13010	P13010	XRCC5	X-ray repair cross-complementing protein 5	1	M	PM				Nuc		4.14955e+06	38	109199	0.437104	47731.2	0.00294401	0.00132544	0.00409504	0.00331286	0.00341809	0.0032878	61.2263	53.4796	131.332	130.757	134.974	102.776	145.345	68.8551	78.5133	72.303
sp|P62993|GRB2_HUMAN	P62993	P62993	GRB2	Growth factor receptor-bound protein 2	1	M	PM				Nuc		1.33233e+06	14	95166.4	0.499223	47509.2	0.00293031	0.000717417	0.00373897	0.00240537	0.00504943	0.0046157	5.56588	8.01222	33.284	33.0453	14.1248	20.6548	25.6213	28.1544	39.7337	28.0957
sp|P49773|HINT1_HUMAN	P49773	P49773	HINT1	Histidine triad nucleotide-binding protein 1	1	M	PM				Nuc		753139	8	94142.4	0.495966	46691.4	0.00287987	0.0023363	0.00227845	0.003349	0.00432591	0.00276406	53.4611	36.2197	23.009	27.9533	45.5487	39.9199	21.0346	33.4825	20.495	23.3553
sp|A6NIZ1|RP1BL_HUMAN	A6NIZ1	A6NIZ1	RP1BL	Ras-related protein Rap-1b-like protein	1	M	PM						935659	10	93565.9	0.498295	46623.4	0.00287568	0.00159708	0.00705971	0.00413794	0	0	10.021	12.7257	54.2693	44.5161	18.8676	25.3511	0	0	0	0
sp|P07766|CD3E_HUMAN	P07766	P07766	CD3E	T-cell surface glycoprotein CD3 epsilon chain	1	M	PM						913420	10	91342	0.506695	46282.6	0.00285465	0.0017064	0.00185262	0.00238481	0.00498327	0.0051293	22.7278	23.6381	19.0434	20.3094	21.0077	25.4007	28.9422	34.4644	47.0514	38.7269
sp|P25311|ZA2G_HUMAN	P25311	P25311	AZGP1	Zinc-alpha-2-glycoprotein	1	M	PM			XC	Nuc		1.61153e+06	18	89529.4	0.501677	44914.9	0.0027703	0.0035796	0.00297776	0.00526679	0	0	69.3598	47.3103	19.5499	31.145	42.1842	53.5211	0	0	0	0
sp|P20851|C4BPB_HUMAN	P20851	P20851	C4BPB	C4b-binding protein beta chain	2	M	PM			XC			1.2567e+06	14	89764.2	0.4837	43419	0.00267803	0.00486257	0.00173287	0.00444692	0	0	124.82	107.272	27.5271	30.2525	74.9578	75.4287	0	0	0	0
sp|Q9NZH8|IL36G_HUMAN	Q9NZH8	Q9NZH8	IL36G	Interleukin-36 gamma	1					XC			955299	9	106144	0.406965	43197	0.00266434	0.000914845	0.00104467	0.00283209	0.00752307	0.00353864	27.9908	14.353	15.1181	12.9704	138.999	34.1634	21.8642	58.927	15.5901	30.2589
sp|P22001|KCNA3_HUMAN	P22001	P22001	KCNA3	Potassium voltage-gated channel subfamily A member 3	2	M	PM						2.44035e+06	23	106102	0.401454	42595.1	0.00262722	0.000762561	0.00289484	0.00128589	0.00479234	0.00556876	22.0487	17.8178	90.5054	53.5281	35.0694	23.1015	67.7622	55.905	114.517	70.9185
sp|P09543|CN37_HUMAN	P09543	P09543	CNP	2',3'-cyclic-nucleotide 3'-phosphodiesterase	2	M	PM			XC	Nuc		2.84623e+06	28	101651	0.41652	42339.7	0.00261146	0.00058544	0.00337103	0.00293524	0.00423182	0.00328482	24.3104	14.7458	88.2154	67.1933	66.0588	56.8445	68.1774	53.2154	85.3684	45.0941
sp|Q8TCT9-2|HM13_HUMAN	Q8TCT9-2	Q8TCT9	HM13	Isoform 2 of Minor histocompatibility antigen H13	1	M	PM		CS				1.40797e+06	16	87997.9	0.479735	42215.7	0.00260381	0.00219493	0.00290858	0.00363091	0.00258344	0.00148123	45.4242	30.84	30.4589	32.3408	39.1335	39.2254	13.9797	18.1224	14.0167	11.3432
sp|Q13740-2|CD166_HUMAN	Q13740-2	Q13740	ALCAM	Isoform 2 of CD166 antigen	2	M	PM						2.23127e+06	27	82639.5	0.510322	42172.7	0.00260116	0.00123948	0.00321935	0.00211249	0.00356819	0.0040055	33.9859	42.3379	88.6391	87.0228	51.9961	55.4804	57.5889	60.8498	75.0961	74.5704
sp|P51178-2|PLCD1_HUMAN	P51178-2	P51178	PLCD1	Isoform 2 of 1-phosphatidylinositol 4,5-bisphosphate phosphodiesterase delta-1	1	M	PM						3.06527e+06	36	85146.5	0.492656	41948	0.0025873	0.000529047	0.00321128	0.00212396	0.00471555	0.00416182	9.12367	10.8666	53.7976	52.1982	29.7464	33.5432	44.5853	48.3565	60.0134	46.5913
sp|Q14005|IL16_HUMAN	Q14005	Q14005	IL16	Pro-interleukin-16	4	M	PM			XC	Nuc		5.62489e+06	69	81520.2	0.502523	40965.8	0.00252672	0.00108035	0.00417541	0.00288494	0.00223508	0.0025484	51.1499	66.7805	195.624	204.249	113.088	137.113	94.238	68.9762	103.222	85.8563
sp|Q9UGI8|TES_HUMAN	Q9UGI8	Q9UGI8	TES	Testin	2	M	PM				Nuc		1.9323e+06	24	80512.5	0.507213	40837	0.00251878	0.000500701	0.00493961	0.00310277	0.00203245	0.00232813	12.3567	18.7317	146.89	146.241	83.263	89.2499	38.3636	37.9614	49.121	47.471
sp|P01824|HV439_HUMAN	P01824	P01824	IGHV4-39	Immunoglobulin heavy variable 4-39	1	M	PM			XC			290408	4	72601.9	0.558977	40582.8	0.0025031	0.00220003	0.00291666	0.00587131	0	0	14.3866	15.6992	12.4658	16.4707	23.9453	32.2139	0	0	0	0
sp|Q86VZ1|P2RY8_HUMAN	Q86VZ1	Q86VZ1	P2RY8	P2Y purinoceptor 8	1	M	PM						786011	10	78601.1	0.513825	40387.2	0.00249103	0.00251753	0.00257934	0.00198693	0.00286563	0.00268221	42.675	59.6888	42.2527	48.3955	38.6451	36.2209	32.6544	33.9204	45.2029	34.6603
sp|P61073-2|CXCR4_HUMAN	P61073-2	P61073	CXCR4	Isoform 2 of C-X-C chemokine receptor type 4	1	M	PM		CS				712860	10	71286	0.540989	38564.9	0.00237864	0.00224969	0.00545544	0.00261021	0	0	18.5034	30.5778	48.7593	58.6802	31.6145	27.2784	0	0	0	0
sp|P54764|EPHA4_HUMAN	P54764	P54764	EPHA4	Ephrin type-A receptor 4	2	M	PM		CS				2.9014e+06	45	64475.5	0.597722	38538.4	0.002377	0.00101815	0.00276657	0.00212056	0.00422965	0.00296925	22.093	29.2748	41.2811	62.9512	28.4752	46.8806	33.972	60.7172	39.9811	46.5321
sp|Q96CW1|AP2M1_HUMAN	Q96CW1	Q96CW1	AP2M1	AP-2 complex subunit mu	2	M	PM						1.81553e+06	26	69828.2	0.535384	37384.9	0.00230585	0.000436905	0.00465923	0.00271593	0.00190592	0.00210574	13.3685	13.6246	83.7775	114.981	56.5774	65.1198	32.2951	29.6732	38.9108	35.79
sp|Q13162|PRDX4_HUMAN	Q13162	Q13162	PRDX4	Peroxiredoxin-4	1					XC	Nuc		1090534	15	72702.3	0.513105	37303.9	0.00230086	0.0013852	0.00342862	0.00246615	0.00267581	0.00176678	31.1158	25.0265	19.4779	49.0214	36.9415	34.2583	23.9762	24.1361	30.6745	17.3977
sp|P23743|DGKA_HUMAN	P23743	P23743	DGKA	Diacylglycerol kinase alpha	3	M	PM						2.9332e+06	39	75210.2	0.49511	37237.3	0.00229675	0.000281018	0.00423749	0.00247129	0.00255529	0.00269421	12.4593	12.8361	150.558	153.174	76.3709	86.7923	62.7577	58.2724	83.4721	67.0737
sp|Q9BZQ8|NIBAN_HUMAN	Q9BZQ8	Q9BZQ8	FAM129A	Protein Niban	1	M	PM						2.93679e+06	37	79372.7	0.461177	36604.9	0.00225774	0.000293188	0.00269377	0.00150023	0.00505511	0.00373534	15.3218	8.30955	71.8521	60.4184	37.4341	32.6925	64.504	71.5295	80.3722	57.701
sp|P80108|PHLD_HUMAN	P80108	P80108	GPLD1	Phosphatidylinositol-glycan-specific phospholipase D	2	M				XC			2.76341e+06	37	74686.9	0.489494	36558.8	0.0022549	0.00257589	0.00186465	0.00337816	0.001249	0.00156943	112.512	95.5515	52.3385	54.7376	100.919	96.3495	23.6076	23.1311	25.0655	31.7304
sp|P08246|ELNE_HUMAN	P08246	P08246	ELANE	Neutrophil elastase	1				CS	XC			953306	12	79442.2	0.447092	35518	0.0021907	0.00378284	0.00229125	0.0029919	0	0	125.757	82.2024	23.3253	39.4019	63.1229	49.9888	0	0	0	0
sp|Q9NPH3|IL1AP_HUMAN	Q9NPH3	Q9NPH3	IL1RAP	Interleukin-1 receptor accessory protein	2	M	PM			XC			2.3804e+06	30	79346.7	0.438851	34821.3	0.00214774	0.000748684	0.0029315	0.00167482	0.00351665	0.00298987	46.208	14.6279	54.7982	45.3265	22.5665	25.16	30.7517	34.3034	39.0845	31.8389
sp|P51858-3|HDGF_HUMAN	P51858-3	P51858	HDGF	Isoform 3 of Hepatoma-derived growth factor	1					XC			1.08997e+06	16	68123.2	0.489675	33358.2	0.00205749	0.00100908	0.00164222	0.00274024	0.00386883	0.00196167	43.7419	18.6392	20.634	24.0054	43.5707	38.9176	15.1507	35.6782	19.6695	19.7491
sp|P51884|LUM_HUMAN	P51884	P51884	LUM	Lumican	1					XC			1.06795e+06	16	66746.9	0.479959	32035.8	0.00197593	0.0035347	0.0014499	0.00317371	0	0	229.726	178.845	63.798	58.055	96.9377	123.467	0	0	0	0
sp|Q8NC51-3|PAIRB_HUMAN	Q8NC51-3	Q8NC51	SERBP1	Isoform 3 of Plasminogen activator inhibitor 1 RNA-binding protein	1	M	PM				Nuc		1.33582e+06	19	70306.3	0.454984	31988.3	0.001973	0.00130876	0.0015904	0.00238624	0.0031861	0.00205304	148.138	69.69	51.9932	67.0187	140.311	97.6976	46.7583	84.702	66.4261	59.5841
sp|O75828|CBR3_HUMAN	O75828	O75828	CBR3	Carbonyl reductase [NADPH] 3	1					XC			1.10723e+06	16	69201.8	0.461355	31926.6	0.0019692	0.000865548	0.00239436	0.00149607	0.00352523	0.0026189	14.2763	11.926	34.2903	26.1079	22.546	15.8494	25.5755	24.2502	17.497	19.6673
sp|P24723|KPCL_HUMAN	P24723	P24723	PRKCH	Protein kinase C eta type	1	M	PM						1.95165e+06	32	60989.1	0.51589	31463.7	0.00194064	0.00145699	0.00182873	0.00236048	0.00253763	0.00185141	91.4368	69.7075	50.2944	69.2389	85.8219	86.8325	42.905	60.6145	43.5962	48.278
sp|Q92556|ELMO1_HUMAN	Q92556	Q92556	ELMO1	Engulfment and cell motility protein 1	1	M	PM						2.57588e+06	39	66048.2	0.474108	31314	0.00193141	0	0.00247085	0.00152583	0.00470563	0.00272277	0	0	30.0749	20.387	7.54181	12.2318	18.5826	24.4946	24.3148	15.4725
sp|Q01518|CAP1_HUMAN	Q01518	Q01518	CAP1	Adenylyl cyclase-associated protein 1	2	M	PM						1.53138e+06	28	54692.2	0.561599	30715.1	0.00189447	0.00174734	0.00123213	0.00253935	0.00287911	0.00131442	90.3746	119.956	61.7475	66.9386	97.6995	134.036	61.3127	98.6788	54.8176	49.1809
sp|Q9Y696|CLIC4_HUMAN	Q9Y696	Q9Y696	CLIC4	Chloride intracellular channel protein 4	1	M	PM		CS				822155	15	54810.3	0.55232	30272.9	0.00186719	0.00111647	0.00100873	0.00228222	0.00291296	0.00294764	14.556	27.7637	14.1474	19.8509	33.994	43.636	36.2535	36.1649	36.7069	39.9508
sp|P17066|HSP76_HUMAN	P17066	P17066	HSPA6	Heat shock 70 kDa protein 6	2	M	PM						2982635	37	80611.8	0.375061	30234.3	0.00186482	0.00326411	0.00130689	0.00240527	0.000384711	0.000700917	52.2055	77.4722	20.4564	24.547	104.684	43.8937	40.0181	4.55867	48.4645	9.06712
sp|P00740|FA9_HUMAN	P00740	P00740	F9	Coagulation factor IX	1	M	PM			XC			1.15609e+06	19	60846.7	0.47904	29148	0.00179781	0.00290355	0.00115414	0.00346398	0	0	103.888	75.2389	28.0518	23.6674	50.6765	69.0156	0	0	0	0
sp|O75718|CRTAP_HUMAN	O75718	O75718	CRTAP	Cartilage-associated protein	2					XC			1.3921e+06	24	58004.3	0.499029	28945.8	0.00178534	0.00128885	0.0015218	0.00215707	0.00305816	0.00138863	70.6937	47.1188	34.8319	44.0278	63.62	60.6335	29.4972	55.818	37.5406	27.6694
sp|Q9NWQ8|PHAG1_HUMAN	Q9NWQ8	Q9NWQ8	PAG1	Phosphoprotein associated with glycosphingolipid-enriched microdomains 1	1	M	PM						1.01759e+06	17	59858.1	0.475856	28483.8	0.00175685	0.000570663	0.0021074	0.000907679	0.00273367	0.00372736	21.8243	23.7853	71.185	69.5108	31.558	29.0883	72.6171	56.8849	93.5432	84.6742
sp|Q9Y4F9|FA65B_HUMAN	Q9Y4F9	Q9Y4F9	FAM65B	Protein FAM65B	3	M	PM						3.00157e+06	52	57722.4	0.481315	27782.7	0.0017136	0.000732635	0.0031924	0.00195542	0.0014462	0.00127008	39.9051	36.7779	134.337	126.822	84.4592	75.4742	34.1166	36.2453	41.3251	34.7499
sp|O75636|FCN3_HUMAN	O75636	O75636	FCN3	Ficolin-3	1					XC			769984	15	51332.3	0.533293	27375.2	0.00168847	0.000973493	0.000793653	0.00165094	0.00279929	0.00333492	27.5059	24.4845	12.8025	15.7967	31.1763	31.9263	33.5839	35.1503	28.8921	45.7157
sp|Q8TCT7|SPP2B_HUMAN	Q8TCT7	Q8TCT7	SPPL2B	Signal peptide peptidase-like 2B	1	M	PM						1.48892e+06	27	55145.1	0.490791	27064.7	0.00166932	0.000826978	0.00131145	0.00106729	0.00286823	0.00348548	9.89589	13.7119	18.6407	17.208	15.0587	13.6064	25.3069	23.7433	34.6098	31.4983
sp|Q14254|FLOT2_HUMAN	Q14254	Q14254	FLOT2	Flotillin-2	2	M	PM						1.49101e+06	26	57346.4	0.471928	27063.3	0.00166923	0.000549641	0.00188618	0.00148334	0.00280843	0.00262715	39.1493	26.3911	77.7989	71.67	56.3262	54.7616	73.6609	67.3231	76.3322	68.7519
sp|P17655|CAN2_HUMAN	P17655	P17655	CAPN2	Calpain-2 catalytic subunit	1	M	PM				Nuc		1.89963e+06	33	57564.6	0.467597	26917	0.00166021	0.000406311	0.00171773	0.00174225	0.00306362	0.00247601	6.88426	6.93391	23.2308	23.1981	23.8794	22.8606	27.458	26.1022	34.8263	23.0299
sp|P40200|TACT_HUMAN	P40200	P40200	CD96	T-cell surface protein tactile	1	M	PM						960253	19	50539.6	0.529183	26744.7	0.00164958	0.00115513	0.00345382	0.00267612	0	0	17.0366	25.2136	58.5271	59.6597	39.9073	44.9126	0	0	0	0
sp|P07358|CO8B_HUMAN	P07358	P07358	C8B	Complement component C8 beta chain	2	M				XC			1.37552e+06	28	49125.9	0.526763	25877.7	0.00159611	0.00173457	0.000855487	0.00203228	0.00136104	0.00201742	130.427	110.003	42.1804	42.9343	98.6499	99.0959	26.8325	43.0933	29.6947	69.732
sp|O15197|EPHB6_HUMAN	O15197	O15197	EPHB6	Ephrin type-B receptor 6	2	M	PM			XC			1.99575e+06	41	48676.8	0.526478	25627.3	0.00158066	0.0011785	0.00162687	0.00166395	0.00221898	0.00154921	48.6886	44.4946	44.2063	48.6078	42.146	48.3031	28.0067	41.8267	30.4264	31.8792
sp|P04196|HRG_HUMAN	P04196	P04196	HRG	Histidine-rich glycoprotein	1	M	PM			XC			983836	22	44719.8	0.547618	24489.4	0.00151048	0.00239778	0.000861838	0.0015867	0.000870349	0.00130312	41.2182	52.1591	14.7039	14.8362	25.2494	26.5383	8.26587	9.4523	8.4013	15.4499
sp|Q14956|GPNMB_HUMAN	Q14956	Q14956	GPNMB	Transmembrane glycoprotein NMB	1	M	PM						988320	20	49416	0.480912	23764.8	0.00146578	0.00104719	0.00114355	0.00195841	0.00238625	0.00116354	39.6683	22.1956	22.1322	19.1811	28.5414	31.9156	15.0329	25.251	15.4995	13.4414
sp|P21796|VDAC1_HUMAN	P21796	P21796	VDAC1	Voltage-dependent anion-selective channel protein 1	1	M	PM				Nuc		796896	17	46876.3	0.494026	23158.1	0.00142836	0.00111049	0.00102705	0.00185563	0.00214998	0.0013305	63.018	37.3279	23.3243	27.3203	47.6003	47.9586	18.6169	36.0807	24.6894	24.3756
sp|P02788|TRFL_HUMAN	P02788	P02788	LTF	Lactotransferrin	2				CS	XC	Nuc		2.07399e+06	46	45086.7	0.503443	22698.6	0.00140002	0.000831424	0.00135407	0.0029609	0.00104874	0.000629812	116.71	40.6734	29.3524	52.421	66.9063	111.37	16.2557	25.6142	14.2701	16.7927
sp|P12111|CO6A3_HUMAN	P12111	P12111	COL6A3	Collagen alpha-3(VI) chain	5					XC			7.19705e+06	162	44426.2	0.501259	22269.1	0.00137353	0.00108392	0.00113715	0.00165238	0.00224412	0.00105726	414.592	269.612	200.049	223.839	218.439	316.017	177.158	278.683	215.057	143.332
sp|P15144|AMPN_HUMAN	P15144	P15144	ANPEP	Aminopeptidase N	2	M	PM			XC			1.9076e+06	45	42391.1	0.523728	22201.4	0.00136936	0.000825252	0.001057	0.00188753	0.00231747	0.00122171	117.405	75.4572	64.3168	76.483	105.272	132.699	56.2383	105.792	67.1874	60.8839
sp|Q92859|NEO1_HUMAN	Q92859	Q92859	NEO1	Neogenin	1	M	PM						2.51406e+06	59	42611.2	0.5135	21880.9	0.00134959	0.00027739	0.00152075	0.000924	0.00278626	0.00235264	0	5.9279	31.998	25.7185	12.4127	15.1824	24.192	29.7273	29.8895	27.4023
sp|Q15149|PLEC_HUMAN	Q15149	Q15149	PLEC	Plectin	11	M	PM						1.28562e+07	291	44179.3	0.492216	21745.7	0.00134125	0.000863397	0.0012617	0.00157849	0.00197752	0.001416	710.351	501.306	432.38	579.73	897.942	704.681	382.452	573.239	472.714	448.103
sp|Q9NZP8|C1RL_HUMAN	Q9NZP8	Q9NZP8	C1RL	Complement C1r subcomponent-like protein	1					XC			795955	19	41892.4	0.508371	21296.9	0.00131357	0.0017344	0.000606604	0.00168862	0.000708282	0.00159327	62.4101	56.1245	19.0993	15.5341	37.7433	42.0139	16.6543	11.4428	12.2627	28.1004
sp|Q8WUM4|PDC6I_HUMAN	Q8WUM4	Q8WUM4	PDCD6IP	Programmed cell death 6-interacting protein	1	M				XC			2072870	48	43184.8	0.473726	20457.8	0.00126181	0.000307213	0.00146483	0.00134297	0.00194799	0.00197545	7.94573	5.87932	24.62	22.1846	22.8448	19.7612	16.0832	18.6122	25.2037	20.6051
sp|P21980|TGM2_HUMAN	P21980	P21980	TGM2	Protein-glutamine gamma-glutamyltransferase 2	1	M	PM						1.16769e+06	32	36490.4	0.552299	20153.6	0.00124305	0.000993345	0.00119478	0.00164608	0.00169877	0.000785286	30.4331	28.9977	22.4809	27.6011	21.1357	36.9463	18.4906	24.7583	13.486	12.4943
sp|Q86YV0|RASL3_HUMAN	Q86YV0	Q86YV0	RASAL3	RAS protein activator like-3	2	M	PM						2.40608e+06	57	42211.9	0.474387	20024.8	0.0012351	0.00025911	0.00215519	0.00118938	0.00171539	0.00131444	15.4375	9.8078	68.7538	64.558	33.82	34.6151	29.419	32.4171	39.2819	27.1176
sp|Q99808-2|S29A1_HUMAN	Q99808-2	Q99808	SLC29A1	Isoform 2 of Equilibrative nucleoside transporter 1	1	M	PM						571696	18	31760.9	0.622699	19777.5	0.00121985	0.00335892	0.000652725	0.000678295	0	0	31.911	62.0036	10.0862	9.53509	7.18221	9.62707	0	0	0	0
sp|P46940|IQGA1_HUMAN	P46940	P46940	IQGAP1	Ras GTPase-activating-like protein IQGAP1	3	M	PM						3.38373e+06	81	41774.5	0.467065	19511.4	0.00120344	0.000409348	0.00115557	0.00115949	0.00201736	0.00204635	50.4696	33.1657	81.6989	74.0919	78.5149	72.2304	96.2543	81.6024	94.082	90.3645
sp|P15498|VAV_HUMAN	P15498	P15498	VAV1	Proto-oncogene vav	1	M	PM						1.79714e+06	45	39936.5	0.485041	19370.8	0.00119477	0	0.00197245	0.00105704	0.00156107	0.00211648	0	0	31.6006	34.4172	19.1973	17.9202	19.912	17.1846	30.1039	25.4348
sp|P40189|IL6RB_HUMAN	P40189	P40189	IL6ST	Interleukin-6 receptor subunit beta	2	M	PM			XC			1.80901e+06	44	41113.9	0.455589	18731.1	0.00115531	0.00051868	0.00155555	0.00106816	0.00155432	0.00149968	23.6771	26.8416	84.9997	63.7044	53.0048	42.5013	38.9605	40.158	56.8768	42.2989
sp|P98172|EFNB1_HUMAN	P98172	P98172	EFNB1	Ephrin-B1	1	M	PM				Nuc		704590	20	35229.5	0.528482	18618.2	0.00114835	0.00078878	0.00141693	0.000513236	0.00171628	0.00179381	14.3701	19.2857	25.2869	27.416	9.72354	9.64837	17.4773	20.9503	23.438	23.9043
sp|P08865|RSSA_HUMAN	P08865	P08865	RPSA	40S ribosomal protein SA	1	M	PM				Nuc		517814	13	39831.8	0.46682	18594.3	0.00114687	0.000734218	0.000973723	0.00152122	0.0018784	0.000957216	58.4075	24.8843	21.2082	26.1164	37.2069	39.6417	19.1499	31.7843	24.0531	17.6821
sp|Q7LDG7-2|GRP2_HUMAN	Q7LDG7-2	Q7LDG7	RASGRP2	Isoform 2 of RAS guanyl-releasing protein 2	1	M	PM						1.29953e+06	33	39379.7	0.472167	18593.8	0.00114684	7.62047e-05	0.00197027	0.000708737	0.00212521	0.00163745	7.66187	4.33687	108.162	88.7356	32.5703	31.0126	54.0319	60.3838	60.5686	50.7906
sp|P55160|NCKPL_HUMAN	P55160	P55160	NCKAP1L	Nck-associated protein 1-like	2	M	PM						2.32354e+06	62	37476.5	0.490344	18376.4	0.00113343	0.000131401	0.00127915	0.000894304	0.00258442	0.00176856	10.835	6.41072	62.8623	49.3866	25.5542	33.5469	49.4153	62.9501	58.5047	47.0273
sp|Q13478|IL18R_HUMAN	Q13478	Q13478	IL18R1	Interleukin-18 receptor 1	1	M	PM						1.05566e+06	26	40602.3	0.451895	18348	0.00113168	0.000438733	0.00124747	0.000840639	0.00140827	0.00239217	23.9052	21.5744	77.4668	48.545	42.4918	31.7838	39.6766	34.5738	59.7568	64.1139
sp|O43566-5|RGS14_HUMAN	O43566-5	O43566	RGS14	Isoform 3 of Regulator of G-protein signaling 14	1	M	PM				Nuc		972221	26	37393.1	0.4841	18102	0.00111651	0.000155071	0.00061843	0.000496306	0.00301047	0.00274375	7.34291	5.61739	15.7566	17.7285	18.7877	13.8233	49.1018	54.4455	64.3734	54.1714
sp|P24821|TENA_HUMAN	P24821	P24821	TNC	Tenascin	3	M				XC			3.23923e+06	100	32392.3	0.553801	17938.9	0.00110645	0.000736772	0.000812217	0.00141265	0.00217929	0.000797241	159.547	123	93.3761	107.305	108.413	181.329	96.2249	181.64	78.887	72.541
sp|Q9BXI6-2|TB10A_HUMAN	Q9BXI6-2	Q9BXI6	TBC1D10A	Isoform 2 of TBC1 domain family member 10A	1	M	PM						1.09132e+06	30	36377.4	0.490595	17846.6	0.00110076	0.000201611	0.001308	0.000527799	0.00226395	0.00219233	0	5.17468	34.7351	26.5678	7.93016	10.4159	23.8226	29.0109	39.2548	30.6689
sp|Q15223|NECT1_HUMAN	Q15223	Q15223	NECTIN1	Nectin-1	1	M	PM			XC			723683	22	32894.7	0.541687	17818.6	0.00109903	0.000891489	0.000868093	0.000727635	0.00184663	0.00165425	58.1476	92.8902	71.6558	71.5809	43.4003	58.2942	79.7038	96.0632	96.3349	93.9457
sp|Q16181|SEPT7_HUMAN	Q16181	Q16181	SEPT7	Septin-7	1	M	PM				Nuc		711024	22	32319.3	0.534111	17262.1	0.0010647	0.000792535	0.000955069	0.00151594	0.00124667	0.000920013	30.1762	26.587	15.3605	25.355	29.2659	39.1013	19.7934	20.8798	17.704	16.8216
sp|P12259|FA5_HUMAN	P12259	P12259	F5	Coagulation factor V	2	M	PM			XC			2.8697e+06	87	32985.1	0.519161	17124.6	0.00105622	0.00134578	0.000718153	0.00127775	0.000742777	0.000990427	87.0173	80.9525	29.4386	34.1862	54.4751	59.0966	20.0925	22.3069	21.0852	32.4714
sp|P23229-6|ITA6_HUMAN	P23229-6	P23229	ITGA6	Isoform Alpha-6X1X2A of Integrin alpha-6	1	M	PM		CS				1.82806e+06	58	31518.3	0.528475	16656.7	0.00102736	0.00021226	0.000418655	0.00055734	0.00286099	0.00239014	16.3753	21.6695	32.4767	33.823	42.3037	43.7479	123.818	145.82	122.338	132.991
sp|Q32P28-3|P3H1_HUMAN	Q32P28-3	Q32P28	P3H1	Isoform 3 of Prolyl 3-hydroxylase 1	1	M				XC	Nuc		959233	34	28212.7	0.565349	15950	0.000983779	0.000661043	0.000767137	0.00146811	0.00134662	0.000874868	64.5698	61.6964	41.8863	56.6605	73.0469	105.353	37.3558	62.7477	37.5903	44.5035
sp|P15311|EZRI_HUMAN	P15311	P15311	EZR	Ezrin	1	M	PM			XC			1.29311e+06	34	38032.8	0.403595	15349.9	0.000946761	0.000514602	0.000812147	0.000956176	0.00131804	0.00158174	14.2863	13.91	17.7673	17.3728	75.0972	19.8725	10.527	17.7873	18.6364	23.3031
sp|P16615|AT2A2_HUMAN	P16615	P16615	ATP2A2	Sarcoplasmic/endoplasmic reticulum calcium ATPase 2	2	M	PM						1.4765e+06	46	32097.9	0.475842	15273.6	0.000942055	0.000620609	0.000793808	0.00127096	0.00160665	0.000674309	95.6058	50.5795	45.0838	51.1975	82.3451	79.6427	41.0859	65.3734	40.7249	29.9527
sp|P04040|CATA_HUMAN	P04040	P04040	CAT	Catalase	1	M	PM			XC			939517	29	32397.2	0.443915	14381.6	0.00088704	0.000836349	0.00111957	0.00191841	0	0	41.4444	17.1086	18.5158	18.124	21.9727	30.1734	0	0	0	0
sp|P55145|MANF_HUMAN	P55145	P55145	MANF	Mesencephalic astrocyte-derived neurotrophic factor	1					XC	Nuc		295619	9	32846.5	0.428379	14070.8	0.000867869	0.000445787	0.000666222	0.00130621	0.00125983	0.000957649	48.9501	15.1139	17.8085	17.875	45.3524	34.0504	12.3188	21.3249	17.095	17.6961
sp|Q9BSJ8-2|ESYT1_HUMAN	Q9BSJ8-2	Q9BSJ8	ESYT1	Isoform 2 of Extended synaptotagmin-1	1	M	PM						1.26723e+06	46	27548.5	0.507382	13977.6	0.000862122	0.00018741	0.00129244	0.000729645	0.00140934	0.00116088	10.4033	5.68471	29.0832	31.0244	12.1097	17.0171	18.5116	21.343	21.4107	19.1922
sp|P46459|NSF_HUMAN	P46459	P46459	NSF	Vesicle-fusing ATPase	1	M	PM						1103131	43	25654.2	0.531753	13641.7	0.000841404	0.000168957	0.00146949	0.00151189	0.00056617	0.000469483	3.88919	6.53041	37.5471	44.9479	42.7407	44.9307	7.69401	10.9253	11.3537	9.89024
sp|P04436|TVA1_HUMAN	P04436	P04436	TRAV19	T-cell receptor alpha chain V region HPB-MLT (Fragment)	1	M	PM						237574	10	23757.4	0.567627	13485.3	0.000831758	0.000160549	0.00122439	0.00243031	0	0	11.9863	6.96659	26.4736	42.0444	60.6358	81.0835	0	0	0	0
sp|O75369-8|FLNB_HUMAN	O75369-8	O75369	FLNB	Isoform 8 of Filamin-B	3	M	PM						3.84823e+06	136	28295.8	0.473271	13391.6	0.000825978	0.00037619	0.00104373	0.000948678	0.00119821	0.000821003	67.8964	41.8374	89.5629	91.859	109.697	81.1211	53.5574	66.5292	47.7979	49.7649
sp|Q13813-2|SPTN1_HUMAN	Q13813-2	Q13813	SPTAN1	Isoform 2 of Spectrin alpha chain, non-erythrocytic 1	3	M	PM			XC			3.54809e+06	143	24811.8	0.507121	12582.6	0.00077608	0.000526612	0.000486238	0.00116156	0.00112543	0.000790821	131.372	71.3213	45.7137	52.1141	76.3786	120.956	57.4808	76.0978	57.2784	58.3752
sp|P49368|TCPG_HUMAN	P49368	P49368	CCT3	T-complex protein 1 subunit gamma	1	M	PM						766778	31	24734.8	0.474891	11746.3	0.000724498	0.000191498	0.00118355	0.000971195	0.000642544	0.000762954	26.7616	23.4625	115.762	114.756	109.556	91.4905	42.3763	39.3041	59.3405	50.9484
sp|P06213|INSR_HUMAN	P06213	P06213	INSR	Insulin receptor	1	M	PM						1.46623e+06	70	20946.2	0.535957	11226.2	0.000692421	0.000388158	0.000613813	0.000621854	0.00131395	0.000895026	31.7709	23.4656	23.1758	29.3654	21.6374	28.9047	27.8018	39.6574	26.2524	29.4903
sp|P12110|CO6A2_HUMAN	P12110	P12110	COL6A2	Collagen alpha-2(VI) chain	1					XC			1.0245e+06	48	21343.8	0.508633	10856.2	0.000669596	0.00049873	0.000455485	0.000798528	0.00113918	0.000681943	35.2034	23.2438	14.3709	16.7994	22.735	28.6147	16.6751	26.5067	19.6845	17.3225
sp|P32248|CCR7_HUMAN	P32248	P32248	CCR7	C-C chemokine receptor type 7	1	M	PM		CS				316561	13	24350.9	0.441554	10752.2	0.000663184	0.000546266	0.00150553	0.000848998	0	0	17.3166	19.6734	60.6196	42.9084	30.946	23.5094	0	0	0	0
sp|P08519|APOA_HUMAN	P08519	P08519	LPA	Apolipoprotein(a)	1					XC			3.51679e+06	172	20446.5	0.512008	10468.8	0.0006457	0.000834081	0.00070139	0.000692283	0.000435532	0.000346009	36.954	37.6086	13.6104	25.0274	21.3219	24.0005	14.3789	9.80442	13.7566	8.5033
sp|P29622|KAIN_HUMAN	P29622	P29622	SERPINA4	Kallistatin	1					XC			443520	24	18480	0.542988	10034.4	0.00061891	0.000792698	0.000524834	0.00133031	0	0	25.2783	24.8683	9.67117	13.0298	23.9556	32.0884	0	0	0	0
sp|P50895|BCAM_HUMAN	P50895	P50895	BCAM	Basal cell adhesion molecule	2	M	PM						439307	30	14643.6	0.612007	8961.97	0.000552764	0.0016011	0.000125201	0.00021107	0.000175946	7.73234e-05	105.458	175.972	10.9816	10.8895	11.1006	17.8365	7.28706	9.65444	4.00224	4.63188
sp|P18510-3|IL1RA_HUMAN	P18510-3	P18510	IL1RN	Isoform 3 of Interleukin-1 receptor antagonist protein	1	M	PM			XC			250705	8	31338.1	0.259756	8140.27	0.000502082	0.000280387	0.000525919	0.00144781	0	0	20.6909	9.70549	18.9577	14.4064	138.874	38.5326	0	0	0	0
sp|Q9HBG7|LY9_HUMAN	Q9HBG7	Q9HBG7	LY9	T-lymphocyte surface antigen Ly-9	1	M	PM						391011	25	15640.4	0.487374	7622.75	0.000470162	0.000360971	0.000905726	0.000802445	0	0	68.7434	66.4621	150.19	131.97	109.264	113.599	0	0	0	0
sp|P18084|ITB5_HUMAN	P18084	P18084	ITGB5	Integrin beta-5	1	M	PM		CS				706575	44	16058.5	0.474021	7612.07	0.000469503	0.000294738	0.00101954	0.00076836	0	0	10.6538	11.4305	46.5942	31.2904	15.5786	22.9115	0	0	0	0
sp|Q92888-4|ARHG1_HUMAN	Q92888-4	Q92888	ARHGEF1	Isoform 4 of Rho guanine nucleotide exchange factor 1	1	M	PM						635786	44	14449.7	0.505694	7307.12	0.000450694	0.00019742	0.000711352	0.000454603	0.000426404	0.000553662	16.6973	29.3209	75.0256	83.6081	50.3577	51.9131	42.3897	31.6177	51.3739	44.818
sp|Q00610|CLH1_HUMAN	Q00610	Q00610	CLTC	Clathrin heavy chain 1	1	M	PM			XC			1357676	88	15428.1	0.467334	7210.09	0.00044471	0.000374065	0.000302524	0.000540338	0.000759233	0.000357763	56.2745	38.5914	23.7337	24.6991	45.1902	42.8615	30.5358	39.1059	32.7595	20.1169
sp|P00748|FA12_HUMAN	P00748	P00748	F12	Coagulation factor XII	1	M	PM			XC			411620	28	14700.7	0.482735	7096.54	0.000437706	0.000879576	0.000279707	0.000620123	0	0	40.9457	35.3133	9.04468	8.8868	17.8833	19.1426	0	0	0	0
sp|P13671|CO6_HUMAN	P13671	P13671	C6	Complement component C6	1	M				XC			602240	46	13092.2	0.524549	6867.49	0.000423579	0.000597744	0.000172805	0.000365135	0.000410186	0.000562857	275.898	255.378	52.0484	58.4253	127.366	119.944	63.802	87.4928	72.1346	131.065
sp|Q9H2K8|TAOK3_HUMAN	Q9H2K8	Q9H2K8	TAOK3	Serine/threonine-protein kinase TAO3	1	M	PM				Nuc		548406	39	14061.7	0.464524	6531.99	0.000402885	7.17231e-05	0.000621876	0.000281382	0.000638039	0.00064852	4.25169	6.24143	60.3549	42.8258	15.276	18.8269	29.9277	27.7201	35.8655	30.7588
sp|Q99829|CPNE1_HUMAN	Q99829	Q99829	CPNE1	Copine-1	1	M	PM				Nuc		197887	16	12367.9	0.513744	6353.95	0.000391904	0.00031529	0.000625039	0.000783876	0	0	16.4907	16.3988	28.6647	25.7269	24.387	31.3479	0	0	0	0
sp|Q14160-3|SCRIB_HUMAN	Q14160-3	Q14160	SCRIB	Isoform 3 of Protein scribble homolog	1	M	PM						832584	73	11405.3	0.543234	6195.72	0.000382145	0.000678918	0.000493041	0.000261426	9.9687e-05	0.000105654	84.8199	127.465	69.2827	73.2545	36.8727	37.7382	8.17511	9.34407	18.2991	10.8114
sp|Q7L1W4|LRC8D_HUMAN	Q7L1W4	Q7L1W4	LRRC8D	Volume-regulated anion channel subunit LRRC8D	1	M	PM						487822	44	11086.9	0.550452	6102.78	0.000376412	8.42678e-05	0.000409698	0.000411078	0.000814006	0.000414352	3.15755	5.56843	26.9876	21.4246	16.1658	20.8859	14.8367	26.8548	12.0742	14.9232
sp|Q02487|DSC2_HUMAN	Q02487	Q02487	DSC2	Desmocollin-2	1	M	PM						562772	41	13726.2	0.422352	5797.27	0.000357569	0.000105445	0.000101889	0.000434659	0.001285	0.000233098	16.2999	8.00022	8.12344	6.11757	89.2226	25.3561	9.928	48.6746	10.1692	9.63905
sp|O95782|AP2A1_HUMAN	O95782	O95782	AP2A1	AP-2 complex subunit alpha-1	1	M	PM						520004	53	9811.4	0.495132	4857.94	0.000299632	0.000128376	0.000315966	0.000248991	0.000482585	0.000493982	22.9686	24.7326	48.7429	48.1731	33.186	36.8833	51.0446	46.4178	56.2262	51.8704
sp|P23142|FBLN1_HUMAN	P23142	P23142	FBLN1	Fibulin-1	1	M				XC			299287	31	9654.43	0.492505	4754.86	0.000293274	0.000386457	0.000262623	0.000601951	0	0	25.3793	21.0094	10.6137	11.2985	23.2252	25.1612	0	0	0	0
sp|P53621-2|COPA_HUMAN	P53621-2	P53621	COPA	Isoform 2 of Coatomer subunit alpha	1	M				XC			611861	69	8867.55	0.509053	4514.05	0.000278421	3.59533e-05	0.000446812	0.000415059	0.000169146	0.000386136	3.84615	3.84959	38.7442	37.8598	22.4876	34.1699	12.9355	9.04192	25.6199	22.534
sp|Q93084-5|AT2A3_HUMAN	Q93084-5	Q93084	ATP2A3	Isoform SERCA3E of Sarcoplasmic/endoplasmic reticulum calcium ATPase 3	1	M	PM						324106	44	7366.05	0.555909	4094.85	0.000252565	8.3623e-05	0.000538407	0.000521122	0	0	6.45503	7.46043	21.3262	38.0125	37.1016	35.7467	0	0	0	0
sp|P63010-2|AP2B1_HUMAN	P63010-2	P63010	AP2B1	Isoform 2 of AP-2 complex subunit beta	1	M	PM						270958	42	6451.39	0.530236	3420.76	0.000210988	4.01765e-05	0.000465838	0.000457407	0	0	5.92861	3.29574	26.6306	30.2407	22.7118	28.8497	0	0	0	0
sp|O60486|PLXC1_HUMAN	O60486	O60486	PLXNC1	Plexin-C1	1	M	PM						365987	77	4753.08	0.57737	2744.29	0.000169264	0.000101553	0.000380164	0.000270155	0	0	9.07473	11.0963	18.588	32.8726	21.1357	22.6964	0	0	0	0
sp|O60437|PEPL_HUMAN	O60437	O60437	PPL	Periplakin	1	M	PM				Nuc		543697	114	4769.27	0.548325	2615.11	0.000161297	0.000111815	0.000123747	0.000168194	0.000246085	0.000219208	16.7439	20.169	8.81602	17.6642	43.8343	23.3267	5.43218	22.1612	11.5604	21.5507
sp|P27816|MAP4_HUMAN	P27816	P27816	MAP4	Microtubule-associated protein 4	1	M	PM						275939	59	4676.94	0.530984	2483.38	0.000153172	8.54276e-05	8.81683e-05	0.000160306	0.00033409	0.000196061	32.6401	29.1765	20.2854	23.83	38.5635	42.0961	38.2266	56.9668	36.844	36.4962
sp|P01031|CO5_HUMAN	P01031	P01031	C5	Complement C5	1	M				XC			233405	82	2846.4	0.464942	1323.41	8.16265e-05	5.61971e-05	0.000110463	0.000195884	0	0	18.3356	12.3306	14.8342	19.1807	41.124	33.0467	0	0	0	0

## Sheet: S3C - Monocytes and T cells PM
Protein Id	Uniprot-L	Uniprot-S	Gene Symbol	Description	CD14+ Monocytes Peptides	CD4+ T cells Peptides	M	PM	IPM	CS	XC	Nuc	ShG	CD14+ Monocytes % PM	CD4+ T cell % PM	Ratio (% PM in monocytes / % PM in T cells)
sp|P16070|CD44_HUMAN	P16070	P16070	CD44	CD44 antigen	312	48	M	PM		CS				30.0714	4.83338	6.2216
sp|P11169|GTR3_HUMAN	P11169	P11169	SLC2A3	Solute carrier family 2, facilitated glucose transporter member 3	53	5	M	PM						12.0639	0.0661446	182.387
sp|P16150|LEUK_HUMAN	P16150	P16150	SPN	Leukosialin	38	37	M	PM		CS	XC			6.96766	12.2683	0.56794
sp|P35613|BASI_HUMAN	P35613	P35613	BSG	Basigin	20	13	M	PM						4.72854	0.426749	11.0804
sp|P08575|PTPRC_HUMAN	P08575	P08575	PTPRC	Receptor-type tyrosine-protein phosphatase C	137	190	M	PM		CS				3.06526	6.166	0.497123
sp|P05107|ITB2_HUMAN	P05107	P05107	ITGB2	Integrin beta-2	111	48	M	PM		CS	XC			2.95395	0.374131	7.89549
sp|P15144|AMPN_HUMAN	P15144	P15144	ANPEP	Aminopeptidase N	109	2	M	PM			XC			2.16697	0.00136936	1582.48
sp|P32942|ICAM3_HUMAN	P32942	P32942	ICAM3	Intercellular adhesion molecule 3	44	38	M	PM						1.71037	1.69725	1.00773
sp|P05556|ITB1_HUMAN	P05556	P05556	ITGB1	Integrin beta-1	78	37	M	PM		CS				1.46606	0.553493	2.64874
sp|P08571|CD14_HUMAN	P08571	P08571	CD14	Monocyte differentiation antigen CD14	15	4	M	PM			XC			1.35781	0.0376857	36.0299
sp|P00738|HPT_HUMAN	P00738	P00738	HP	Haptoglobin	31	26					XC			1.33689	0.779496	1.71507
sp|P54709|AT1B3_HUMAN	P54709	P54709	ATP1B3	Sodium/potassium-transporting ATPase subunit beta-3	12	9	M	PM						1.28865	0.392486	3.2833
sp|Q8N131|PORIM_HUMAN	Q8N131	Q8N131	TMEM123	Porimin	3	1	M	PM						1.24011	1.04275	1.18927
sp|P05362|ICAM1_HUMAN	P05362	P05362	ICAM1	Intercellular adhesion molecule 1	45	2	M	PM		CS	XC			1.08755	0.00951058	114.352
sp|P68032|ACTC_HUMAN	P68032	P68032	ACTC1	Actin, alpha cardiac muscle 1	40	70	M				XC			1.06265	6.36394	0.16698
sp|P20701-2|ITAL_HUMAN	P20701-2	P20701	ITGAL	Isoform 2 of Integrin alpha-L	45	41	M	PM		CS				1.0611	0.693951	1.52907
sp|P26447|S10A4_HUMAN	P26447	P26447	S100A4	Protein S100-A4	7	4					XC	Nuc		0.890328	0.177675	5.01099
sp|P08514|ITA2B_HUMAN	P08514	P08514	ITGA2B	Integrin alpha-IIb	48	6	M	PM		CS				0.729597	0.0243363	29.9797
sp|P68431|H31_HUMAN	P68431	P68431	HIST1H3A	Histone H3.1	12	12	M				XC	Nuc		0.680036	1.10044	0.617969
sp|P78324-2|SHPS1_HUMAN	P78324-2	P78324	SIRPA	Isoform 2 of Tyrosine-protein phosphatase non-receptor type substrate 1	36	4	M	PM						0.645736	0.020459	31.5624
sp|P08648|ITA5_HUMAN	P08648	P08648	ITGA5	Integrin alpha-5	40	12	M	PM		CS				0.547811	0.0881956	6.21132
sp|Q92536|YLAT2_HUMAN	Q92536	Q92536	SLC7A6	Y+L amino acid transporter 2	2	2	M	PM						0.529494	0.0298195	17.7566
sp|Q08722|CD47_HUMAN	Q08722	Q08722	CD47	Leukocyte surface antigen CD47	10	21	M	PM						0.495135	2.44652	0.202383
sp|P06703|S10A6_HUMAN	P06703	P06703	S100A6	Protein S100-A6	6	5	M	PM				Nuc		0.481763	0.247962	1.94289
sp|P07355-2|ANXA2_HUMAN	P07355-2	P07355	ANXA2	Isoform 2 of Annexin A2	29	29	M	PM		CS	XC	Nuc		0.441438	0.455156	0.969861
sp|P62805|H4_HUMAN	P62805	P62805	HIST1H4A	Histone H4	19	10	M				XC	Nuc		0.37748	0.202389	1.86512
sp|P16284|PECA1_HUMAN	P16284	P16284	PECAM1	Platelet endothelial cell adhesion molecule	46	14	M	PM			XC			0.320308	0.0461981	6.93336
sp|P32249|GP183_HUMAN	P32249	P32249	GPR183	G-protein coupled receptor 183	13	3	M	PM						0.279333	0.233699	1.19527
sp|P05090|APOD_HUMAN	P05090	P05090	APOD	Apolipoprotein D	12	15					XC			0.241034	0.61002	0.395125
sp|Q12913|PTPRJ_HUMAN	Q12913	Q12913	PTPRJ	Receptor-type tyrosine-protein phosphatase eta	47	9	M	PM		CS				0.24076	0.0126953	18.9646
sp|Q9UGN4|CLM8_HUMAN	Q9UGN4	Q9UGN4	CD300A	CMRF35-like molecule 8	14	2	M	PM						0.228484	0.0183104	12.4784
sp|P11279|LAMP1_HUMAN	P11279	P11279	LAMP1	Lysosome-associated membrane glycoprotein 1	12	3	M	PM						0.218144	0.0767528	2.84216
sp|P15529-2|MCP_HUMAN	P15529-2	P15529	CD46	Isoform B of Membrane cofactor protein	14	18	M	PM		CS				0.215213	0.404927	0.531486
sp|P26038|MOES_HUMAN	P26038	P26038	MSN	Moesin	16	7	M	PM			XC	Nuc		0.197528	0.0153444	12.8729
sp|P19440|GGT1_HUMAN	P19440	P19440	GGT1	Gamma-glutamyltranspeptidase 1	23	10	M	PM			XC			0.158698	0.0570832	2.78011
sp|P63000-2|RAC1_HUMAN	P63000-2	P63000	RAC1	Isoform B of Ras-related C3 botulinum toxin substrate 1	8	13	M	PM						0.146176	0.844553	0.173081
sp|P19256|LFA3_HUMAN	P19256	P19256	CD58	Lymphocyte function-associated antigen 3	5	2	M	PM		CS				0.145937	0.42731	0.341524
sp|P02749|APOH_HUMAN	P02749	P02749	APOH	Beta-2-glycoprotein 1	8	5				CS	XC			0.144674	0.13506	1.07118
sp|Q93033|IGSF2_HUMAN	Q93033	Q93033	CD101	Immunoglobulin superfamily member 2	45	26	M	PM						0.136123	0.0657574	2.07008
sp|P13987|CD59_HUMAN	P13987	P13987	CD59	CD59 glycoprotein	3	6	M	PM		CS	XC			0.132108	0.197809	0.667859
sp|P04083|ANXA1_HUMAN	P04083	P04083	ANXA1	Annexin A1	24	20	M	PM		CS	XC	Nuc		0.124566	0.0922365	1.3505
sp|P04217|A1BG_HUMAN	P04217	P04217	A1BG	Alpha-1B-glycoprotein	8	2					XC			0.121176	0.00770224	15.7326
sp|P09326|CD48_HUMAN	P09326	P09326	CD48	CD48 antigen	13	12	M	PM						0.118798	0.292485	0.406169
sp|Q14242-2|SELPL_HUMAN	Q14242-2	Q14242	SELPLG	Isoform 2 of P-selectin glycoprotein ligand 1	6	9	M	PM						0.104924	0.726084	0.144506
sp|P19397|CD53_HUMAN	P19397	P19397	CD53	Leukocyte surface antigen CD53	8	3	M	PM		CS				0.103146	0.0931275	1.10758
sp|P08174-7|DAF_HUMAN	P08174-7	P08174	CD55	Isoform 7 of Complement decay-accelerating factor	17	6	M	PM		CS	XC			0.102034	0.0171593	5.94626
sp|P14209|CD99_HUMAN	P14209	P14209	CD99	CD99 antigen	8	6	M	PM						0.101641	1.32857	0.0765042
sp|P02765|FETUA_HUMAN	P02765	P02765	AHSG	Alpha-2-HS-glycoprotein	6	10					XC			0.101512	0.59601	0.170319
sp|P08670|VIME_HUMAN	P08670	P08670	VIM	Vimentin	25	34	M	PM						0.100572	0.344238	0.292158
sp|P04075-2|ALDOA_HUMAN	P04075-2	P04075	ALDOA	Isoform 2 of Fructose-bisphosphate aldolase A	5	6	M				XC	Nuc		0.0974865	0.0302096	3.227
sp|P60903|S10AA_HUMAN	P60903	P60903	S100A10	Protein S100-A10	1	1	M	PM						0.0944458	0.0472104	2.00053
sp|P05141|ADT2_HUMAN	P05141	P05141	SLC25A5	ADP/ATP translocase 2	8	12	M	PM				Nuc		0.0939003	0.15398	0.609823
sp|P11021|GRP78_HUMAN	P11021	P11021	HSPA5	78 kDa glucose-regulated protein	21	25	M	PM		CS		Nuc		0.0934677	0.0796596	1.17334
sp|P34910-2|EVI2B_HUMAN	P34910-2	P34910	EVI2B	Isoform 2 of Protein EVI2B	14	2	M	PM						0.0933703	0.0148603	6.28322
sp|P58335|ANTR2_HUMAN	P58335	P58335	ANTXR2	Anthrax toxin receptor 2	8	4	M	PM			XC			0.0889469	0.0306854	2.89867
sp|P23528|COF1_HUMAN	P23528	P23528	CFL1	Cofilin-1	7	11	M				XC	Nuc		0.0871417	0.329164	0.264736
sp|P49961-6|ENTP1_HUMAN	P49961-6	P49961	ENTPD1	Isoform 6 of Ectonucleoside triphosphate diphosphohydrolase 1	14	2	M	PM						0.086565	0.00956114	9.05383
sp|Q8NBI5-2|S43A3_HUMAN	Q8NBI5-2	Q8NBI5	SLC43A3	Isoform 2 of Solute carrier family 43 member 3	7	2	M						ShG	0.0859939	0.00486542	17.6745
sp|P04406|G3P_HUMAN	P04406	P04406	GAPDH	Glyceraldehyde-3-phosphate dehydrogenase	16	19	M	PM				Nuc		0.0813911	0.295544	0.275394
sp|Q6PCB8|EMB_HUMAN	Q6PCB8	Q6PCB8	EMB	Embigin	8	5	M	PM						0.0812026	0.158418	0.512585
sp|Q9Y624|JAM1_HUMAN	Q9Y624	Q9Y624	F11R	Junctional adhesion molecule A	15	7	M	PM						0.0800486	0.0352935	2.26808
sp|Q06830|PRDX1_HUMAN	Q06830	Q06830	PRDX1	Peroxiredoxin-1	7	9					XC	Nuc		0.0765638	0.0991159	0.772467
sp|P08195-4|4F2_HUMAN	P08195-4	P08195	SLC3A2	Isoform 4 of 4F2 cell-surface antigen heavy chain	14	23	M	PM		CS		Nuc		0.0738826	0.080325	0.919796
sp|Q9NV96|CC50A_HUMAN	Q9NV96	Q9NV96	TMEM30A	Cell cycle control protein 50A	9	1	M	PM						0.0719377	0.00401463	17.9189
sp|P06733|ENOA_HUMAN	P06733	P06733	ENO1	Alpha-enolase	12	15	M	PM			XC	Nuc		0.0709403	0.0720261	0.984925
sp|P62937|PPIA_HUMAN	P62937	P62937	PPIA	Peptidyl-prolyl cis-trans isomerase A	10	4	M				XC	Nuc		0.0681733	0.0930412	0.732721
sp|P02787|TRFE_HUMAN	P02787	P02787	TF	Serotransferrin	23	14	M	PM		CS	XC			0.0631094	0.0375198	1.68203
sp|Q13740-2|CD166_HUMAN	Q13740-2	Q13740	ALCAM	Isoform 2 of CD166 antigen	13	2	M	PM						0.0615372	0.00260116	23.6576
sp|P02656|APOC3_HUMAN	P02656	P02656	APOC3	Apolipoprotein C-III	2	11					XC			0.0609939	4.32424	0.0141051
sp|P20645|MPRD_HUMAN	P20645	P20645	M6PR	Cation-dependent mannose-6-phosphate receptor	10	3	M	PM						0.0594213	0.00608483	9.76549
sp|P05023-4|AT1A1_HUMAN	P05023-4	P05023	ATP1A1	Isoform 4 of Sodium/potassium-transporting ATPase subunit alpha-1	25	19	M	PM			XC			0.055928	0.0803448	0.6961
sp|P30511-3|HLAF_HUMAN	P30511-3	P30511	HLA-F	Isoform 3 of HLA class I histocompatibility antigen, alpha chain F	4	4	M	PM		CS				0.0559035	0.104153	0.536746
sp|Q9Y639|NPTN_HUMAN	Q9Y639	Q9Y639	NPTN	Neuroplastin	11	6	M			CS				0.0541677	0.100555	0.538687
sp|Q6GTX8|LAIR1_HUMAN	Q6GTX8	Q6GTX8	LAIR1	Leukocyte-associated immunoglobulin-like receptor 1	4	1	M	PM						0.0531415	0.0711833	0.746544
sp|O14672|ADA10_HUMAN	O14672	O14672	ADAM10	Disintegrin and metalloproteinase domain-containing protein 10	12	3	M	PM		CS		Nuc		0.0530554	0.00766071	6.92565
sp|P21333|FLNA_HUMAN	P21333	P21333	FLNA	Filamin-A	39	65	M	PM			XC	Nuc		0.0485599	0.0462729	1.04942
sp|P04899|GNAI2_HUMAN	P04899	P04899	GNAI2	Guanine nucleotide-binding protein G(i) subunit alpha-2	8	7	M	PM			XC			0.0475631	0.169319	0.280908
sp|P60709|ACTB_HUMAN	P60709	P60709	ACTB	Actin, cytoplasmic 1	5	15	M	PM			XC			0.0471514	0.613856	0.0768118
sp|Q9NPH3|IL1AP_HUMAN	Q9NPH3	Q9NPH3	IL1RAP	Interleukin-1 receptor accessory protein	19	2	M	PM			XC			0.0425353	0.00214774	19.8047
sp|Q92542|NICA_HUMAN	Q92542	Q92542	NCSTN	Nicastrin	12	3	M	PM						0.0422012	0.0286905	1.47091
sp|O60486|PLXC1_HUMAN	O60486	O60486	PLXNC1	Plexin-C1	27	1	M	PM						0.0408711	0.000169264	241.463
sp|P14618|KPYM_HUMAN	P14618	P14618	PKM	Pyruvate kinase PKM	14	20	M	PM			XC	Nuc		0.0405486	0.11259	0.360143
sp|P13598|ICAM2_HUMAN	P13598	P13598	ICAM2	Intercellular adhesion molecule 2	5	12	M	PM						0.0380029	0.326917	0.116247
sp|Q13291-4|SLAF1_HUMAN	Q13291-4	Q13291	SLAMF1	Isoform 4 of Signaling lymphocytic activation molecule	8	4	M	PM						0.0370562	0.0542024	0.683664
sp|P07996|TSP1_HUMAN	P07996	P07996	THBS1	Thrombospondin-1	25	5	M	PM		CS	XC			0.036377	0.00689418	5.27648
sp|Q8NG11|TSN14_HUMAN	Q8NG11	Q8NG11	TSPAN14	Tetraspanin-14	2	2	M	PM		CS				0.0361668	0.0175136	2.06507
sp|P09382|LEG1_HUMAN	P09382	P09382	LGALS1	Galectin-1	4	8				CS	XC	Nuc		0.0341721	0.383838	0.0890274
sp|P06396|GELS_HUMAN	P06396	P06396	GSN	Gelsolin	8	7	M	PM			XC			0.0341399	0.0167608	2.0369
sp|Q4KMQ2-2|ANO6_HUMAN	Q4KMQ2-2	Q4KMQ2	ANO6	Isoform 2 of Anoctamin-6	15	8	M	PM		CS				0.0330596	0.0221742	1.4909
sp|P11166|GTR1_HUMAN	P11166	P11166	SLC2A1	Solute carrier family 2, facilitated glucose transporter member 1	4	4	M	PM				Nuc		0.0326661	0.215409	0.151647
sp|P78536|ADA17_HUMAN	P78536	P78536	ADAM17	Disintegrin and metalloproteinase domain-containing protein 17	18	3	M	PM		CS				0.0314561	0.00470878	6.68031
sp|Q5VTE0|EF1A3_HUMAN	Q5VTE0	Q5VTE0	EEF1A1P5	Putative elongation factor 1-alpha-like 3	12	24					XC	Nuc		0.0298029	0.478184	0.0623253
sp|Q9Y666|S12A7_HUMAN	Q9Y666	Q9Y666	SLC12A7	Solute carrier family 12 member 7	17	3	M	PM						0.0293766	0.00437814	6.70984
sp|P43652|AFAM_HUMAN	P43652	P43652	AFM	Afamin	20	8					XC			0.0291364	0.0108072	2.69602
sp|O60449-2|LY75_HUMAN	O60449-2	O60449	LY75	Isoform 2 of Lymphocyte antigen 75	20	13	M	PM						0.0270111	0.0193701	1.39448
sp|Q8IWA5-3|CTL2_HUMAN	Q8IWA5-3	Q8IWA5	SLC44A2	Isoform 3 of Choline transporter-like protein 2	10	15	M	PM						0.0260028	0.123235	0.211001
sp|P60174|TPIS_HUMAN	P60174	P60174	TPI1	Triosephosphate isomerase	5	6					XC	Nuc		0.0259491	0.0200293	1.29556
sp|Q9UHW9|S12A6_HUMAN	Q9UHW9	Q9UHW9	SLC12A6	Solute carrier family 12 member 6	11	8	M	PM						0.0253097	0.0123329	2.05221
sp|P62158|CALM_HUMAN	P62158	P62158	CALM1	Calmodulin	4	1	M	PM			XC	Nuc		0.0246689	0.00770428	3.20198
sp|P23229|ITA6_HUMAN	P23229	P23229	ITGA6	Integrin alpha-6	17	31	M	PM		CS				0.0240108	0.129074	0.186024
sp|P13473-2|LAMP2_HUMAN	P13473-2	P13473	LAMP2	Isoform LAMP-2B of Lysosome-associated membrane glycoprotein 2	5	2	M	PM			XC			0.0232178	0.00440496	5.27084
sp|P56199|ITA1_HUMAN	P56199	P56199	ITGA1	Integrin alpha-1	18	2	M	PM		CS				0.0230056	0.00544588	4.22441
sp|P25705|ATPA_HUMAN	P25705	P25705	ATP5A1	ATP synthase subunit alpha, mitochondrial	9	12	M	PM						0.0228235	0.0383879	0.59455
sp|P28907|CD38_HUMAN	P28907	P28907	CD38	ADP-ribosyl cyclase/cyclic ADP-ribose hydrolase 1	15	5	M	PM		CS		Nuc		0.0225935	0.0066966	3.37389
sp|P63104|1433Z_HUMAN	P63104	P63104	YWHAZ	14-3-3 protein zeta/delta	5	4	M				XC	Nuc		0.0220103	0.0498415	0.441605
sp|P18433|PTPRA_HUMAN	P18433	P18433	PTPRA	Receptor-type tyrosine-protein phosphatase alpha	9	7	M	PM						0.0217129	0.0333278	0.651496
sp|Q9Y5S1|TRPV2_HUMAN	Q9Y5S1	Q9Y5S1	TRPV2	Transient receptor potential cation channel subfamily V member 2	7	11	M	PM		CS				0.0208186	0.0557148	0.373664
sp|P11142|HSP7C_HUMAN	P11142	P11142	HSPA8	Heat shock cognate 71 kDa protein	10	12	M	PM			XC	Nuc		0.020801	0.0269526	0.771764
sp|P02652|APOA2_HUMAN	P02652	P02652	APOA2	Apolipoprotein A-II	1	13					XC			0.0204231	0.640586	0.031882
sp|Q92854|SEM4D_HUMAN	Q92854	Q92854	SEMA4D	Semaphorin-4D	15	21	M	PM			XC			0.0203306	0.203007	0.100147
sp|Q15743|OGR1_HUMAN	Q15743	Q15743	GPR68	Ovarian cancer G-protein coupled receptor 1	4	1	M	PM						0.0197913	0.00880381	2.24804
sp|P02790|HEMO_HUMAN	P02790	P02790	HPX	Hemopexin	9	3					XC			0.0197466	0.0228798	0.863056
sp|P31785|IL2RG_HUMAN	P31785	P31785	IL2RG	Cytokine receptor common subunit gamma	4	3	M	PM						0.0193846	0.0152868	1.26806
sp|P13796|PLSL_HUMAN	P13796	P13796	LCP1	Plastin-2	8	5	M	PM			XC			0.0191536	0.0203017	0.943451
sp|Q9UIB8-3|SLAF5_HUMAN	Q9UIB8-3	Q9UIB8	CD84	Isoform 3 of SLAM family member 5	5	3	M	PM						0.0191221	0.0210293	0.909307
sp|P0CG48|UBC_HUMAN	P0CG48	P0CG48	UBC	Polyubiquitin-C	17	14	M	PM			XC	Nuc		0.0188916	0.0907527	0.208166
sp|P05771-2|KPCB_HUMAN	P05771-2	P05771	PRKCB	Isoform Beta-II of Protein kinase C beta type	5	5	M	PM				Nuc		0.0188467	0.0173064	1.089
sp|P01042-2|KNG1_HUMAN	P01042-2	P01042	KNG1	Isoform LMW of Kininogen-1	9	25	M	PM			XC			0.0187719	0.322744	0.0581634
sp|P25445|TNR6_HUMAN	P25445	P25445	FAS	Tumor necrosis factor receptor superfamily member 6	7	6	M	PM		CS		Nuc		0.0177687	0.0333182	0.533302
sp|P13612|ITA4_HUMAN	P13612	P13612	ITGA4	Integrin alpha-4	7	21	M	PM		CS				0.0168208	0.148224	0.113482
sp|P30101|PDIA3_HUMAN	P30101	P30101	PDIA3	Protein disulfide-isomerase A3	14	11				CS		Nuc		0.0164308	0.0433241	0.379253
sp|P12931-2|SRC_HUMAN	P12931-2	P12931	SRC	Isoform 2 of Proto-oncogene tyrosine-protein kinase Src	5	1	M	PM				Nuc		0.0163308	0.050105	0.325932
sp|Q15762|CD226_HUMAN	Q15762	Q15762	CD226	CD226 antigen	2	3	M	PM		CS				0.0160242	0.0467927	0.34245
sp|Q8IU68|TMC8_HUMAN	Q8IU68	Q8IU68	TMC8	Transmembrane channel-like protein 8	3	4	M				XC			0.0156443	0.013649	1.14618
sp|P27797|CALR_HUMAN	P27797	P27797	CALR	Calreticulin	5	10	M	PM		CS	XC	Nuc		0.0152333	0.0857674	0.177612
sp|Q9H0X4|F234A_HUMAN	Q9H0X4	Q9H0X4	FAM234A	Protein FAM234A	7	1	M			CS				0.0147383	0.00343062	4.29611
sp|P15529|MCP_HUMAN	P15529	P15529	CD46	Membrane cofactor protein	3	4	M	PM		CS				0.0143324	0.0343348	0.417432
sp|P33527|MRP1_HUMAN	P33527	P33527	ABCC1	Multidrug resistance-associated protein 1	15	7	M	PM						0.0141871	0.0114831	1.23548
sp|P31146|COR1A_HUMAN	P31146	P31146	CORO1A	Coronin-1A	2	9	M	PM						0.0141243	0.114258	0.123617
sp|P04156|PRIO_HUMAN	P04156	P04156	PRNP	Major prion protein	4	2	M	PM		CS		Nuc		0.0137673	0.0372761	0.369333
sp|P02786|TFR1_HUMAN	P02786	P02786	TFRC	Transferrin receptor protein 1	13	5	M	PM		CS	XC			0.0134172	0.037153	0.361134
sp|Q96DU3|SLAF6_HUMAN	Q96DU3	Q96DU3	SLAMF6	SLAM family member 6	1	11	M	PM						0.0133944	0.387517	0.0345646
sp|P15153|RAC2_HUMAN	P15153	P15153	RAC2	Ras-related C3 botulinum toxin substrate 2	2	6	M	PM						0.0132798	0.171376	0.0774892
sp|P48960|CD97_HUMAN	P48960	P48960	CD97	CD97 antigen	7	2	M	PM			XC			0.0130134	0.00331572	3.92475
sp|P01860|IGHG3_HUMAN	P01860	P01860	IGHG3	Ig gamma-3 chain C region	6	6	M	PM			XC			0.0127258	0.0849646	0.149778
sp|Q10589|BST2_HUMAN	Q10589	Q10589	BST2	Bone marrow stromal antigen 2	5	2	M	PM		CS				0.0123492	0.00877067	1.40801
sp|P07900-2|HS90A_HUMAN	P07900-2	P07900	HSP90AA1	Isoform 2 of Heat shock protein HSP 90-alpha	11	8	M	PM			XC	Nuc		0.012	0.0128437	0.934312
sp|P04921|GLPC_HUMAN	P04921	P04921	GYPC	Glycophorin-C	1	7	M	PM						0.0118641	4.4496	0.00266633
sp|P08887|IL6RA_HUMAN	P08887	P08887	IL6R	Interleukin-6 receptor subunit alpha	2	1	M	PM		CS	XC			0.0117923	0.00325598	3.62173
sp|Q01518|CAP1_HUMAN	Q01518	Q01518	CAP1	Adenylyl cyclase-associated protein 1	8	2	M	PM						0.0112147	0.00189447	5.91969
sp|P13747|HLAE_HUMAN	P13747	P13747	HLA-E	HLA class I histocompatibility antigen, alpha chain E	6	3	M	PM		CS				0.0111592	0.00956257	1.16696
sp|P68371|TBB4B_HUMAN	P68371	P68371	TUBB4B	Tubulin beta-4B chain	4	11					XC	Nuc		0.0109157	0.0452966	0.240982
sp|P06127|CD5_HUMAN	P06127	P06127	CD5	T-cell surface glycoprotein CD5	3	39	M	PM						0.0107901	1.21793	0.00885935
sp|O95977|S1PR4_HUMAN	O95977	O95977	S1PR4	Sphingosine 1-phosphate receptor 4	2	1	M	PM						0.0105541	0.00587311	1.79701
sp|Q92896-2|GSLG1_HUMAN	Q92896-2	Q92896	GLG1	Isoform 2 of Golgi apparatus protein 1	15	7	M	PM			XC			0.0102862	0.0137045	0.750568
sp|P08238|HS90B_HUMAN	P08238	P08238	HSP90AB1	Heat shock protein HSP 90-beta	6	4	M	PM		CS				0.010187	0.00747268	1.36323
sp|Q96D31|CRCM1_HUMAN	Q96D31	Q96D31	ORAI1	Calcium release-activated calcium channel protein 1	1	2	M	PM						0.00981862	0.0196894	0.498674
sp|P33241-3|LSP1_HUMAN	P33241-3	P33241	LSP1	Isoform 3 of Lymphocyte-specific protein 1	2	1	M	PM						0.00952556	0.00441658	2.15678
sp|Q9UIQ6|LCAP_HUMAN	Q9UIQ6	Q9UIQ6	LNPEP	Leucyl-cystinyl aminopeptidase	7	7	M	PM			XC			0.00876444	0.0074317	1.17933
sp|P05026|AT1B1_HUMAN	P05026	P05026	ATP1B1	Sodium/potassium-transporting ATPase subunit beta-1	9	4	M	PM			XC			0.00853725	0.0299992	0.284582
sp|P07237|PDIA1_HUMAN	P07237	P07237	P4HB	Protein disulfide-isomerase	10	12	M	PM			XC			0.00853255	0.0481018	0.177385
sp|P04920|B3A2_HUMAN	P04920	P04920	SLC4A2	Anion exchange protein 2	15	11	M	PM						0.00833232	0.0187922	0.443393
sp|P62879|GBB2_HUMAN	P62879	P62879	GNB2	Guanine nucleotide-binding protein G(I)/G(S)/G(T) subunit beta-2	3	3	M	PM			XC			0.00832746	0.0747146	0.111457
sp|Q13162|PRDX4_HUMAN	Q13162	Q13162	PRDX4	Peroxiredoxin-4	2	1					XC	Nuc		0.00792379	0.00230086	3.44384
sp|Q92930|RAB8B_HUMAN	Q92930	Q92930	RAB8B	Ras-related protein Rab-8B	2	2	M	PM						0.00784367	0.00392366	1.99907
sp|P14625|ENPL_HUMAN	P14625	P14625	HSP90B1	Endoplasmin	8	25	M	PM			XC	Nuc		0.00775943	0.0566709	0.136921
sp|P07858|CATB_HUMAN	P07858	P07858	CTSB	Cathepsin B	2	3	M	PM			XC			0.00769513	0.0144802	0.531425
sp|Q01650|LAT1_HUMAN	Q01650	Q01650	SLC7A5	Large neutral amino acids transporter small subunit 1	3	2	M	PM						0.00762966	0.0323023	0.236196
sp|P0CG05|LAC2_HUMAN	P0CG05	P0CG05	IGLC2	Ig lambda-2 chain C regions	2	5	M	PM			XC			0.00742927	0.206416	0.0359917
sp|Q9HAB3|S52A2_HUMAN	Q9HAB3	Q9HAB3	SLC52A2	Solute carrier family 52, riboflavin transporter, member 2	2	2	M	PM						0.00739755	0.0276981	0.267078
sp|Q96F46|I17RA_HUMAN	Q96F46	Q96F46	IL17RA	Interleukin-17 receptor A	4	4	M	PM			XC			0.00737136	0.0232391	0.317197
sp|P04792|HSPB1_HUMAN	P04792	P04792	HSPB1	Heat shock protein beta-1	3	6	M	PM			XC	Nuc		0.00682613	0.0253464	0.269314
sp|P31947|1433S_HUMAN	P31947	P31947	SFN	14-3-3 protein sigma	2	8	M				XC	Nuc		0.00681728	0.0526297	0.129533
sp|P84095|RHOG_HUMAN	P84095	P84095	RHOG	Rho-related GTP-binding protein RhoG	5	10	M	PM						0.00681236	0.0859303	0.0792777
sp|O00299|CLIC1_HUMAN	O00299	O00299	CLIC1	Chloride intracellular channel protein 1	4	3	M	PM			XC	Nuc		0.00669847	0.00756033	0.886002
sp|P10909-2|CLUS_HUMAN	P10909-2	P10909	CLU	Isoform 2 of Clusterin	6	44	M			CS	XC	Nuc		0.00660233	2.04826	0.00322339
sp|P13693|TCTP_HUMAN	P13693	P13693	TPT1	Translationally-controlled tumor protein	1	5					XC	Nuc		0.00636235	0.118199	0.0538275
sp|P61626|LYSC_HUMAN	P61626	P61626	LYZ	Lysozyme C	3	5					XC			0.00571386	0.101508	0.0562897
sp|P05155-3|IC1_HUMAN	P05155-3	P05155	SERPING1	Isoform 3 of Plasma protease C1 inhibitor	4	8					XC			0.00569615	0.094108	0.0605278
sp|O15438-4|MRP3_HUMAN	O15438-4	O15438	ABCC3	Isoform 4 of Canalicular multispecific organic anion transporter 2	4	2	M	PM						0.00561546	0.00758537	0.740301
sp|P68871|HBB_HUMAN	P68871	P68871	HBB	Hemoglobin subunit beta	2	5					XC			0.0055592	0.225943	0.0246045
sp|P19338|NUCL_HUMAN	P19338	P19338	NCL	Nucleolin	8	7	M			CS		Nuc		0.00550366	0.0109407	0.503047
sp|P13639|EF2_HUMAN	P13639	P13639	EEF2	Elongation factor 2	8	12	M	PM				Nuc		0.00532623	0.0236673	0.225046
sp|Q15286|RAB35_HUMAN	Q15286	Q15286	RAB35	Ras-related protein Rab-35	1	5	M	PM						0.00522038	0.0430278	0.121326
sp|Q969P0|IGSF8_HUMAN	Q969P0	Q969P0	IGSF8	Immunoglobulin superfamily member 8	3	16	M	PM						0.00515169	0.0995332	0.0517585
sp|Q9Y490|TLN1_HUMAN	Q9Y490	Q9Y490	TLN1	Talin-1	21	32	M	PM		CS	XC			0.00511116	0.012874	0.397012
sp|P09211|GSTP1_HUMAN	P09211	P09211	GSTP1	Glutathione S-transferase P	1	2					XC	Nuc		0.00508116	0.00546262	0.93017
sp|P10809|CH60_HUMAN	P10809	P10809	HSPD1	60 kDa heat shock protein, mitochondrial	9	10	M	PM		CS	XC			0.00501416	0.0349514	0.143461
sp|Q9Y6M7-13|S4A7_HUMAN	Q9Y6M7-13	Q9Y6M7	SLC4A7	Isoform 13 of Sodium bicarbonate cotransporter 3	7	11	M	PM						0.00496314	0.015642	0.317295
sp|P08865|RSSA_HUMAN	P08865	P08865	RPSA	40S ribosomal protein SA	3	1	M	PM				Nuc		0.00493542	0.00114687	4.30337
sp|O00391|QSOX1_HUMAN	O00391	O00391	QSOX1	Sulfhydryl oxidase 1	3	6	M				XC			0.00470759	0.0116191	0.405159
sp|P60953|CDC42_HUMAN	P60953	P60953	CDC42	Cell division control protein 42 homolog	1	4	M	PM						0.00428641	0.0180979	0.236846
sp|P08754|GNAI3_HUMAN	P08754	P08754	GNAI3	Guanine nucleotide-binding protein G(k) subunit alpha	2	2	M	PM						0.00417143	0.00386217	1.08007
sp|Q00839|HNRPU_HUMAN	Q00839	Q00839	HNRNPU	Heterogeneous nuclear ribonucleoprotein U	5	10	M			CS		Nuc		0.00416875	0.00865508	0.481653
sp|P11362-21|FGFR1_HUMAN	P11362-21	P11362	FGFR1	Isoform 21 of Fibroblast growth factor receptor 1	3	3	M	PM			XC	Nuc		0.00399587	0.0628673	0.0635605
sp|P40926|MDHM_HUMAN	P40926	P40926	MDH2	Malate dehydrogenase, mitochondrial	3	5	M	PM				Nuc		0.00390707	0.0738995	0.0528701
sp|P42892|ECE1_HUMAN	P42892	P42892	ECE1	Endothelin-converting enzyme 1	7	6	M	PM						0.00370677	0.00683764	0.542112
sp|P61106|RAB14_HUMAN	P61106	P61106	RAB14	Ras-related protein Rab-14	3	1	M	PM						0.0035801	0.00319854	1.11929
sp|P01009|A1AT_HUMAN	P01009	P01009	SERPINA1	Alpha-1-antitrypsin	1	20	M				XC			0.00328928	0.611391	0.00538
sp|Q09666|AHNK_HUMAN	Q09666	Q09666	AHNAK	Neuroblast differentiation-associated protein AHNAK	29	28	M	PM				Nuc		0.00326702	0.00383361	0.852206
sp|P62993|GRB2_HUMAN	P62993	P62993	GRB2	Growth factor receptor-bound protein 2	3	1	M	PM				Nuc		0.00318097	0.00293031	1.08554
sp|P35579|MYH9_HUMAN	P35579	P35579	MYH9	Myosin-9	8	34	M	PM				Nuc		0.00294892	0.0390955	0.0754287
sp|P17066|HSP76_HUMAN	P17066	P17066	HSPA6	Heat shock 70 kDa protein 6	1	2	M	PM						0.00292359	0.00186482	1.56776
sp|A6NIZ1|RP1BL_HUMAN	A6NIZ1	A6NIZ1	RP1BL	Ras-related protein Rap-1b-like protein	2	1	M	PM						0.00289691	0.00287568	1.00738
sp|P04040|CATA_HUMAN	P04040	P04040	CAT	Catalase	2	1	M	PM			XC			0.002874	0.00088704	3.23999
sp|P00736|C1R_HUMAN	P00736	P00736	C1R	Complement C1r subcomponent	3	9					XC			0.00283082	0.0265312	0.106698
sp|O00186|STXB3_HUMAN	O00186	O00186	STXBP3	Syntaxin-binding protein 3	2	4	M	PM						0.00253484	0.0140719	0.180135
sp|Q9BX67|JAM3_HUMAN	Q9BX67	Q9BX67	JAM3	Junctional adhesion molecule C	2	1	M	PM			XC			0.00251182	0.0036046	0.696838
sp|Q9Y3Z3|SAMH1_HUMAN	Q9Y3Z3	Q9Y3Z3	SAMHD1	Deoxynucleoside triphosphate triphosphohydrolase SAMHD1	3	3	M	PM				Nuc		0.00238735	0.00719368	0.331867
sp|P46940|IQGA1_HUMAN	P46940	P46940	IQGAP1	Ras GTPase-activating-like protein IQGAP1	9	3	M	PM						0.00230965	0.00120344	1.9192
sp|Q9BZQ8|NIBAN_HUMAN	Q9BZQ8	Q9BZQ8	FAM129A	Protein Niban	2	1	M	PM						0.00213734	0.00225774	0.946672
sp|P61073-2|CXCR4_HUMAN	P61073-2	P61073	CXCR4	Isoform 2 of C-X-C chemokine receptor type 4	1	1	M	PM		CS				0.00211408	0.00237864	0.88878
sp|Q9NZP8|C1RL_HUMAN	Q9NZP8	Q9NZP8	C1RL	Complement C1r subcomponent-like protein	3	1					XC			0.00205713	0.00131357	1.56607
sp|Q9NX76|CKLF6_HUMAN	Q9NX76	Q9NX76	CMTM6	CKLF-like MARVEL transmembrane domain-containing protein 6	1	1	M				XC			0.00203506	0.00319259	0.637433
sp|Q14315|FLNC_HUMAN	Q14315	Q14315	FLNC	Filamin-C	7	6	M	PM						0.00192348	0.00367655	0.523175
sp|P30041|PRDX6_HUMAN	P30041	P30041	PRDX6	Peroxiredoxin-6	2	1	M				XC			0.00189347	0.0072681	0.260518
sp|P08758|ANXA5_HUMAN	P08758	P08758	ANXA5	Annexin A5	3	4	M	PM				Nuc		0.00186842	0.0345495	0.0540796
sp|O75083|WDR1_HUMAN	O75083	O75083	WDR1	WD repeat-containing protein 1	1	5					XC			0.0018221	0.0165566	0.110053
sp|P02760|AMBP_HUMAN	P02760	P02760	AMBP	Protein AMBP	2	7	M	PM		CS	XC			0.00181433	0.0300404	0.0603965
sp|P18206|VINC_HUMAN	P18206	P18206	VCL	Vinculin	9	6	M	PM			XC			0.00167382	0.00310086	0.539791
sp|Q8TD46-4|MO2R1_HUMAN	Q8TD46-4	Q8TD46	CD200R1	Isoform 4 of Cell surface glycoprotein CD200 receptor 1	1	1	M	PM			XC			0.00166785	0.00440864	0.378314
sp|P51148-2|RAB5C_HUMAN	P51148-2	P51148	RAB5C	Isoform 2 of Ras-related protein Rab-5C	1	2	M	PM						0.00166597	0.00440905	0.377852
sp|P12814-4|ACTN1_HUMAN	P12814-4	P12814	ACTN1	Isoform 4 of Alpha-actinin-1	3	8	M	PM			XC			0.00161491	0.0243801	0.0662388
sp|P06213|INSR_HUMAN	P06213	P06213	INSR	Insulin receptor	3	1	M	PM						0.00161407	0.000692421	2.33106
sp|O43493|TGON2_HUMAN	O43493	O43493	TGOLN2	Trans-Golgi network integral membrane protein 2	3	2	M	PM						0.00154104	0.00415934	0.370501
sp|Q14344|GNA13_HUMAN	Q14344	Q14344	GNA13	Guanine nucleotide-binding protein subunit alpha-13	3	6	M	PM				Nuc		0.00151274	0.0132781	0.113928
sp|P23396-2|RS3_HUMAN	P23396-2	P23396	RPS3	Isoform 2 of 40S ribosomal protein S3	2	13	M	PM				Nuc		0.00147572	0.0630964	0.0233884
sp|Q9UIW2|PLXA1_HUMAN	Q9UIW2	Q9UIW2	PLXNA1	Plexin-A1	5	8	M	PM				Nuc		0.00145298	0.00645806	0.224988
sp|Q00610|CLH1_HUMAN	Q00610	Q00610	CLTC	Clathrin heavy chain 1	4	1	M	PM			XC			0.00134165	0.00044471	3.01692
sp|O43707|ACTN4_HUMAN	O43707	O43707	ACTN4	Alpha-actinin-4	3	9					XC	Nuc		0.00133721	0.00859081	0.155656
sp|P52272|HNRPM_HUMAN	P52272	P52272	HNRNPM	Heterogeneous nuclear ribonucleoprotein M	3	11	M	PM			XC			0.00133274	0.0142205	0.0937192
sp|Q14699|RFTN1_HUMAN	Q14699	Q14699	RFTN1	Raftlin	2	2	M	PM						0.00128846	0.00752214	0.171289
sp|P01859|IGHG2_HUMAN	P01859	P01859	IGHG2	Ig gamma-2 chain C region	1	2	M	PM			XC			0.00118745	0.0130514	0.0909826
sp|Q99497|PARK7_HUMAN	Q99497	Q99497	PARK7	Protein deglycase DJ-1	2	1	M	PM				Nuc		0.00118485	0.00308942	0.383519
sp|P27487|DPP4_HUMAN	P27487	P27487	DPP4	Dipeptidyl peptidase 4	3	29	M	PM		CS				0.00117726	0.345333	0.00340907
sp|P25311|ZA2G_HUMAN	P25311	P25311	AZGP1	Zinc-alpha-2-glycoprotein	1	1	M	PM			XC	Nuc		0.00117694	0.0027703	0.424843
sp|Q15149|PLEC_HUMAN	Q15149	Q15149	PLEC	Plectin	24	11	M	PM						0.00114683	0.00134125	0.855043
sp|Q6UWB1|I27RA_HUMAN	Q6UWB1	Q6UWB1	IL27RA	Interleukin-27 receptor subunit alpha	1	3	M	PM						0.00112609	0.00319783	0.352143
sp|Q14956|GPNMB_HUMAN	Q14956	Q14956	GPNMB	Transmembrane glycoprotein NMB	2	1	M	PM						0.00111232	0.00146578	0.758857
sp|O00481|BT3A1_HUMAN	O00481	O00481	BTN3A1	Butyrophilin subfamily 3 member A1	2	6	M	PM						0.00109652	0.0109403	0.100228
sp|P51884|LUM_HUMAN	P51884	P51884	LUM	Lumican	1	1					XC			0.00105948	0.00197593	0.536194
sp|O95445|APOM_HUMAN	O95445	O95445	APOM	Apolipoprotein M	1	7	M	PM			XC			0.00103235	0.511859	0.00201687
sp|Q05682-4|CALD1_HUMAN	Q05682-4	Q05682	CALD1	Isoform 4 of Caldesmon	2	10	M	PM						0.00102618	0.0589959	0.0173941
sp|P02751-15|FINC_HUMAN	P02751-15	P02751	FN1	Isoform 15 of Fibronectin	9	15	M	PM			XC			0.00102584	0.0445087	0.0230481
sp|Q9UIG8|SO3A1_HUMAN	Q9UIG8	Q9UIG8	SLCO3A1	Solute carrier organic anion transporter family member 3A1	1	2	M	PM						0.00101502	0.00787228	0.128936
sp|P23634|AT2B4_HUMAN	P23634	P23634	ATP2B4	Plasma membrane calcium-transporting ATPase 4	2	3	M	PM						0.000991423	0.00349877	0.283363
sp|Q8NC51-3|PAIRB_HUMAN	Q8NC51-3	Q8NC51	SERBP1	Isoform 3 of Plasminogen activator inhibitor 1 RNA-binding protein	1	1	M	PM				Nuc		0.000962413	0.001973	0.487792
sp|P13010|XRCC5_HUMAN	P13010	P13010	XRCC5	X-ray repair cross-complementing protein 5	1	1	M	PM				Nuc		0.000960734	0.00294401	0.326336
sp|Q53RT3|APRV1_HUMAN	Q53RT3	Q53RT3	ASPRV1	Retroviral-like aspartic protease 1	1	1	M						ShG	0.000953162	0.00854077	0.111601
sp|B0I1T2|MYO1G_HUMAN	B0I1T2	B0I1T2	MYO1G	Unconventional myosin-Ig	2	14	M	PM						0.000892657	0.0430925	0.0207149
sp|Q7L1W4|LRC8D_HUMAN	Q7L1W4	Q7L1W4	LRRC8D	Volume-regulated anion channel subunit LRRC8D	1	1	M	PM						0.000851664	0.000376412	2.26258
sp|O00478|BT3A3_HUMAN	O00478	O00478	BTN3A3	Butyrophilin subfamily 3 member A3	2	11	M	PM						0.000835805	0.116436	0.00717821
sp|O43852-4|CALU_HUMAN	O43852-4	O43852	CALU	Isoform 4 of Calumenin	1	4	M				XC			0.000772399	0.0181637	0.0425244
sp|Q6E0U4|DMKN_HUMAN	Q6E0U4	Q6E0U4	DMKN	Dermokine	1	4					XC			0.000760523	0.0195768	0.0388481
sp|P35580-4|MYH10_HUMAN	P35580-4	P35580	MYH10	Isoform 4 of Myosin-10	3	7	M	PM				Nuc		0.000738055	0.00326583	0.225993
sp|P20020|AT2B1_HUMAN	P20020	P20020	ATP2B1	Plasma membrane calcium-transporting ATPase 1	4	5	M	PM				Nuc		0.000718009	0.00439524	0.163361
sp|P13667|PDIA4_HUMAN	P13667	P13667	PDIA4	Protein disulfide-isomerase A4	1	4				CS				0.000690868	0.00579911	0.119133
sp|P01857|IGHG1_HUMAN	P01857	P01857	IGHG1	Ig gamma-1 chain C region	2	3	M	PM			XC			0.00064996	0.0133262	0.048773
sp|Q8TCT7|SPP2B_HUMAN	Q8TCT7	Q8TCT7	SPPL2B	Signal peptide peptidase-like 2B	1	1	M	PM						0.000637433	0.00166932	0.381852
sp|Q16181|SEPT7_HUMAN	Q16181	Q16181	SEPT7	Septin-7	1	1	M	PM				Nuc		0.000627717	0.0010647	0.58957
sp|Q9BSJ8-2|ESYT1_HUMAN	Q9BSJ8-2	Q9BSJ8	ESYT1	Isoform 2 of Extended synaptotagmin-1	1	1	M	PM						0.000617734	0.000862122	0.716527
sp|P05161|ISG15_HUMAN	P05161	P05161	ISG15	Ubiquitin-like protein ISG15	1	2					XC			0.000543252	0.00748024	0.072625
sp|P09543|CN37_HUMAN	P09543	P09543	CNP	2',3'-cyclic-nucleotide 3'-phosphodiesterase	1	2	M	PM			XC	Nuc		0.000542733	0.00261146	0.207828
sp|P00450|CERU_HUMAN	P00450	P00450	CP	Ceruloplasmin	1	5	M				XC			0.000520023	0.00595955	0.0872587
sp|Q13835-2|PKP1_HUMAN	Q13835-2	Q13835	PKP1	Isoform 1 of Plakophilin-1	1	5	M	PM				Nuc		0.000488882	0.0113325	0.0431398
sp|P15311|EZRI_HUMAN	P15311	P15311	EZR	Ezrin	2	1	M	PM			XC			0.000470907	0.000946761	0.497388
sp|P18084|ITB5_HUMAN	P18084	P18084	ITGB5	Integrin beta-5	2	1	M	PM		CS				0.000464691	0.000469503	0.98975
sp|P68366|TBA4A_HUMAN	P68366	P68366	TUBA4A	Tubulin alpha-4A chain	1	4					XC			0.000455829	0.0158559	0.0287482
sp|P02788|TRFL_HUMAN	P02788	P02788	LTF	Lactotransferrin	1	2				CS	XC	Nuc		0.000425698	0.00140002	0.304065
sp|P07384|CAN1_HUMAN	P07384	P07384	CAPN1	Calpain-1 catalytic subunit	1	4	M	PM						0.000415718	0.00386612	0.107528
sp|P07602-3|SAP_HUMAN	P07602-3	P07602	PSAP	Isoform Sap-mu-9 of Prosaposin	1	3	M				XC			0.000411797	0.00327765	0.125638
sp|Q8NE01|CNNM3_HUMAN	Q8NE01	Q8NE01	CNNM3	Metal transporter CNNM3	2	3	M	PM						0.000357835	0.00663145	0.0539603
sp|P12111|CO6A3_HUMAN	P12111	P12111	COL6A3	Collagen alpha-3(VI) chain	7	5					XC			0.000357392	0.00137353	0.2602
sp|P0C0L5|CO4B_HUMAN	P0C0L5	P0C0L5	C4B	Complement C4-B	1	39	M	PM			XC			0.000342356	0.33458	0.00102324
sp|P09104|ENOG_HUMAN	P09104	P09104	ENO2	Gamma-enolase	1	2	M	PM			XC			0.000323702	0.00790312	0.0409588
sp|P12259|FA5_HUMAN	P12259	P12259	F5	Coagulation factor V	1	2	M	PM			XC			0.00029572	0.00105622	0.279979
sp|P32248|CCR7_HUMAN	P32248	P32248	CCR7	C-C chemokine receptor type 7	1	1	M	PM		CS				0.000291215	0.000663184	0.439117
sp|P27816|MAP4_HUMAN	P27816	P27816	MAP4	Microtubule-associated protein 4	1	1	M	PM						0.000251417	0.000153172	1.64141
sp|O75131|CPNE3_HUMAN	O75131	O75131	CPNE3	Copine-3	1	2	M	PM				Nuc		0.000233303	0.00480842	0.0485197
sp|P23458|JAK1_HUMAN	P23458	P23458	JAK1	Tyrosine-protein kinase JAK1	1	12	M	PM				Nuc		0.00022863	0.0165054	0.0138518
sp|P49368|TCPG_HUMAN	P49368	P49368	CCT3	T-complex protein 1 subunit gamma	1	1	M	PM						0.000223576	0.000724498	0.308595
sp|O95466-3|FMNL1_HUMAN	O95466-3	O95466	FMNL1	Isoform 3 of Formin-like protein 1	1	8	M	PM						0.00018106	0.0120433	0.015034
sp|P12110|CO6A2_HUMAN	P12110	P12110	COL6A2	Collagen alpha-2(VI) chain	1	1					XC			0.00018047	0.000669596	0.26952
sp|P41240|CSK_HUMAN	P41240	P41240	CSK	Tyrosine-protein kinase CSK	1	2	M	PM						0.00017711	0.00434163	0.0407935
sp|P16615|AT2A2_HUMAN	P16615	P16615	ATP2A2	Sarcoplasmic/endoplasmic reticulum calcium ATPase 2	1	2	M	PM						0.000165487	0.000942055	0.175667
sp|O94804|STK10_HUMAN	O94804	O94804	STK10	Serine/threonine-protein kinase 10	2	6	M	PM						0.000161507	0.00898568	0.0179738
sp|P63010-2|AP2B1_HUMAN	P63010-2	P63010	AP2B1	Isoform 2 of AP-2 complex subunit beta	1	1	M	PM						0.000135569	0.000210988	0.642542
sp|P53621-2|COPA_HUMAN	P53621-2	P53621	COPA	Isoform 2 of Coatomer subunit alpha	1	1	M				XC			0.000115155	0.000278421	0.413599
sp|P21980|TGM2_HUMAN	P21980	P21980	TGM2	Protein-glutamine gamma-glutamyltransferase 2	1	1	M	PM						0.000105504	0.00124305	0.0848755
sp|O75369-8|FLNB_HUMAN	O75369-8	O75369	FLNB	Isoform 8 of Filamin-B	1	3	M	PM						3.50742e-05	0.000825978	0.0424639
sp|Q8N386|LRC25_HUMAN	Q8N386	Q8N386	LRRC25	Leucine-rich repeat-containing protein 25	5	0	M						ShG	1.26573
sp|Q5QGZ9-1|CL12A_HUMAN	Q5QGZ9-1	Q5QGZ9	CLEC12A	Isoform 1 of C-type lectin domain family 12 member A	4	0	M	PM						0.723163
sp|P20702|ITAX_HUMAN	P20702	P20702	ITGAX	Integrin alpha-X	37	0	M	PM		CS				0.716937
sp|Q9Y336|SIGL9_HUMAN	Q9Y336	Q9Y336	SIGLEC9	Sialic acid-binding Ig-like lectin 9	25	0	M	PM						0.70928
sp|P12318|FCG2A_HUMAN	P12318	P12318	FCGR2A	Low affinity immunoglobulin gamma Fc region receptor II-a	15	0	M	PM						0.663824
sp|Q8NHL6-3|LIRB1_HUMAN	Q8NHL6-3	Q8NHL6	LILRB1	Isoform 3 of Leukocyte immunoglobulin-like receptor subfamily B member 1	51	0	M	PM			XC			0.424771
sp|P21730|C5AR1_HUMAN	P21730	P21730	C5AR1	C5a anaphylatoxin chemotactic receptor 1	10	0	M	PM		CS				0.420568
sp|P11215-2|ITAM_HUMAN	P11215-2	P11215	ITGAM	Isoform 2 of Integrin alpha-M	68	0	M	PM		CS	XC	Nuc		0.414362
sp|P08637|FCG3A_HUMAN	P08637	P08637	FCGR3A	Low affinity immunoglobulin gamma Fc region receptor III-A	8	0	M	PM						0.355355
sp|P24071|FCAR_HUMAN	P24071	P24071	FCAR	Immunoglobulin alpha Fc receptor	5	0	M	PM			XC			0.335063
sp|Q9NP99|TREM1_HUMAN	Q9NP99	Q9NP99	TREM1	Triggering receptor expressed on myeloid cells 1	12	0	M	PM			XC			0.329052
sp|P04839|CY24B_HUMAN	P04839	P04839	CYBB	Cytochrome b-245 heavy chain	31	0	M	PM						0.301844
sp|Q9UKJ1|PILRA_HUMAN	Q9UKJ1	Q9UKJ1	PILRA	Paired immunoglobulin-like type 2 receptor alpha	13	0	M	PM						0.268824
sp|O60603|TLR2_HUMAN	O60603	O60603	TLR2	Toll-like receptor 2	36	0	M	PM		CS				0.263381
sp|Q9NRM0|GTR9_HUMAN	Q9NRM0	Q9NRM0	SLC2A9	Solute carrier family 2, facilitated glucose transporter member 9	3	0	M	PM						0.24721
sp|P50281|MMP14_HUMAN	P50281	P50281	MMP14	Matrix metalloproteinase-14	12	0	M	PM			XC			0.211816
sp|P30273|FCERG_HUMAN	P30273	P30273	FCER1G	High affinity immunoglobulin epsilon receptor subunit gamma	4	0	M	PM		CS				0.198622
sp|Q8N423|LIRB2_HUMAN	Q8N423	Q8N423	LILRB2	Leukocyte immunoglobulin-like receptor subfamily B member 2	25	0	M	PM		CS	XC			0.169434
sp|Q9NY15|STAB1_HUMAN	Q9NY15	Q9NY15	STAB1	Stabilin-1	14	0	M	PM						0.16137
sp|Q92692|NECT2_HUMAN	Q92692	Q92692	NECTIN2	Nectin-2	18	0	M	PM		CS				0.160147
sp|Q10588|BST1_HUMAN	Q10588	Q10588	BST1	ADP-ribosyl cyclase/cyclic ADP-ribose hydrolase 2	7	0	M	PM						0.156689
sp|Q8N370-3|LAT4_HUMAN	Q8N370-3	Q8N370	SLC43A2	Isoform 3 of Large neutral amino acids transporter small subunit 4	12	0	M	PM						0.155651
sp|Q9Y286|SIGL7_HUMAN	Q9Y286	Q9Y286	SIGLEC7	Sialic acid-binding Ig-like lectin 7	7	0	M	PM						0.147724
sp|Q8TDQ1-6|CLM1_HUMAN	Q8TDQ1-6	Q8TDQ1	CD300LF	Isoform 6 of CMRF35-like molecule 1	14	0	M	PM						0.140312
sp|P16671|CD36_HUMAN	P16671	P16671	CD36	Platelet glycoprotein 4	10	0	M	PM		CS	XC			0.130032
sp|P15509-7|CSF2R_HUMAN	P15509-7	P15509	CSF2RA	Isoform 7 of Granulocyte-macrophage colony-stimulating factor receptor subunit alpha	9	0	M	PM			XC			0.125169
sp|Q9NY25|CLC5A_HUMAN	Q9NY25	Q9NY25	CLEC5A	C-type lectin domain family 5 member A	10	0	M	PM		CS				0.123866
sp|Q9NQS5|GPR84_HUMAN	Q9NQS5	Q9NQS5	GPR84	G-protein coupled receptor 84	13	0	M	PM						0.108385
sp|P20333|TNR1B_HUMAN	P20333	P20333	TNFRSF1B	Tumor necrosis factor receptor superfamily member 1B	5	0	M	PM			XC	Nuc		0.0854104
sp|Q15722|LT4R1_HUMAN	Q15722	Q15722	LTB4R	Leukotriene B4 receptor 1	3	0	M	PM						0.0815236
sp|Q86VB7-2|C163A_HUMAN	Q86VB7-2	Q86VB7	CD163	Isoform 2 of Scavenger receptor cysteine-rich type 1 protein M130	26	0	M	PM			XC			0.0760769
sp|Q8NHJ6-3|LIRB4_HUMAN	Q8NHJ6-3	Q8NHJ6	LILRB4	Isoform 3 of Leukocyte immunoglobulin-like receptor subfamily B member 4	22	0	M	PM						0.0745759
sp|P20138|CD33_HUMAN	P20138	P20138	CD33	Myeloid cell surface antigen CD33	13	0	M	PM						0.0735652
sp|P25942|TNR5_HUMAN	P25942	P25942	CD40	Tumor necrosis factor receptor superfamily member 5	7	0	M	PM		CS	XC			0.0729628
sp|P05106|ITB3_HUMAN	P05106	P05106	ITGB3	Integrin beta-3	34	0	M	PM		CS		Nuc		0.0707572
sp|Q04941|PLP2_HUMAN	Q04941	Q04941	PLP2	Proteolipid protein 2	4	0	M	PM						0.0688994
sp|Q9NZQ7|PD1L1_HUMAN	Q9NZQ7	Q9NZQ7	CD274	Programmed cell death 1 ligand 1	13	0	M	PM						0.0682303
sp|O15439|MRP4_HUMAN	O15439	O15439	ABCC4	Multidrug resistance-associated protein 4	5	0	M	PM						0.0681028
sp|O43315|AQP9_HUMAN	O43315	O43315	AQP9	Aquaporin-9	4	0	M	PM						0.0678783
sp|P31949|S10AB_HUMAN	P31949	P31949	S100A11	Protein S100-A11	2	0					XC	Nuc		0.0633992
sp|Q03405|UPAR_HUMAN	Q03405	Q03405	PLAUR	Urokinase plasminogen activator surface receptor	10	0	M	PM						0.0615528
sp|Q8IYS5-3|OSCAR_HUMAN	Q8IYS5-3	Q8IYS5	OSCAR	Isoform 3 of Osteoclast-associated immunoglobulin-like receptor	4	0	M	PM			XC			0.0590817
sp|O75022-2|LIRB3_HUMAN	O75022-2	O75022	LILRB3	Isoform 2 of Leukocyte immunoglobulin-like receptor subfamily B member 3	10	0	M	PM						0.0570577
sp|P43119|PI2R_HUMAN	P43119	P43119	PTGIR	Prostacyclin receptor	3	0	M	PM						0.056591
sp|P17813|EGLN_HUMAN	P17813	P17813	ENG	Endoglin	10	0	M	PM		CS	XC			0.0559335
sp|P02750|A2GL_HUMAN	P02750	P02750	LRG1	Leucine-rich alpha-2-glycoprotein	11	0	M				XC			0.0519399
sp|P08962|CD63_HUMAN	P08962	P08962	CD63	CD63 antigen	4	0	M	PM		CS	XC			0.0509834
sp|P05164-3|PERM_HUMAN	P05164-3	P05164	MPO	Isoform H7 of Myeloperoxidase	18	0					XC	Nuc		0.0502738
sp|P48509|CD151_HUMAN	P48509	P48509	CD151	CD151 antigen	4	0	M	PM						0.0496411
sp|Q9NPY3|C1QR1_HUMAN	Q9NPY3	Q9NPY3	CD93	Complement component C1q receptor	13	0	M	PM		CS				0.0494592
sp|Q07954|LRP1_HUMAN	Q07954	Q07954	LRP1	Prolow-density lipoprotein receptor-related protein 1	94	0	M	PM						0.0481738
sp|O15389|SIGL5_HUMAN	O15389	O15389	SIGLEC5	Sialic acid-binding Ig-like lectin 5	16	0	M						ShG	0.0473238
sp|Q8WWI5|CTL1_HUMAN	Q8WWI5	Q8WWI5	SLC44A1	Choline transporter-like protein 1	4	0	M	PM						0.045683
sp|O15031|PLXB2_HUMAN	O15031	O15031	PLXNB2	Plexin-B2	38	0	M	PM		CS				0.0441923
sp|Q9NPR2|SEM4B_HUMAN	Q9NPR2	Q9NPR2	SEMA4B	Semaphorin-4B	9	0	M	PM			XC			0.0437847
sp|Q9BS26|ERP44_HUMAN	Q9BS26	Q9BS26	ERP44	Endoplasmic reticulum resident protein 44	10	0	M			CS				0.0424897
sp|O95976|IGSF6_HUMAN	O95976	O95976	IGSF6	Immunoglobulin superfamily member 6	3	0	M	PM						0.0404178
sp|P40197|GPV_HUMAN	P40197	P40197	GP5	Platelet glycoprotein V	9	0	M	PM						0.0399065
sp|Q9Y6M5|ZNT1_HUMAN	Q9Y6M5	Q9Y6M5	SLC30A1	Zinc transporter 1	10	0	M	PM						0.0374293
sp|Q9UMR7|CLC4A_HUMAN	Q9UMR7	Q9UMR7	CLEC4A	C-type lectin domain family 4 member A	6	0	M	PM						0.0354324
sp|P01130|LDLR_HUMAN	P01130	P01130	LDLR	Low-density lipoprotein receptor	26	0	M	PM		CS				0.0344532
sp|Q15758|AAAT_HUMAN	Q15758	Q15758	SLC1A5	Neutral amino acid transporter B(0)	6	0	M	PM						0.0340911
sp|P13224-2|GP1BB_HUMAN	P13224-2	P13224	GP1BB	Isoform 2 of Platelet glycoprotein Ib beta chain	5	0	M	PM						0.0332096
sp|P07204|TRBM_HUMAN	P07204	P07204	THBD	Thrombomodulin	5	0	M	PM		CS	XC			0.0328833
sp|Q14246|AGRE1_HUMAN	Q14246	Q14246	ADGRE1	Adhesion G protein-coupled receptor E1	4	0	M	PM						0.0321748
sp|P01589|IL2RA_HUMAN	P01589	P01589	IL2RA	Interleukin-2 receptor subunit alpha	2	0	M	PM						0.0311568
sp|P14384|CBPM_HUMAN	P14384	P14384	CPM	Carboxypeptidase M	10	0	M	PM		CS	XC			0.0309515
sp|P07359|GP1BA_HUMAN	P07359	P07359	GP1BA	Platelet glycoprotein Ib alpha chain	4	0	M	PM		CS				0.0307621
sp|Q9H7F0|AT133_HUMAN	Q9H7F0	Q9H7F0	ATP13A3	Probable cation-transporting ATPase 13A3	15	0	M	PM						0.0304798
sp|Q9Y5U5-2|TNR18_HUMAN	Q9Y5U5-2	Q9Y5U5	TNFRSF18	Isoform 2 of Tumor necrosis factor receptor superfamily member 18	2	0	M	PM			XC			0.0293145
sp|Q9C0K1|S39A8_HUMAN	Q9C0K1	Q9C0K1	SLC39A8	Zinc transporter ZIP8	2	0	M	PM						0.0283108
sp|P29323|EPHB2_HUMAN	P29323	P29323	EPHB2	Ephrin type-B receptor 2	5	0	M	PM			XC			0.0282278
sp|P06756|ITAV_HUMAN	P06756	P06756	ITGAV	Integrin alpha-V	19	0	M	PM		CS				0.0281899
sp|P21462|FPR1_HUMAN	P21462	P21462	FPR1	fMet-Leu-Phe receptor	2	0	M	PM						0.0271097
sp|P42081|CD86_HUMAN	P42081	P42081	CD86	T-lymphocyte activation antigen CD86	7	0	M	PM		CS				0.026023
sp|O95497|VNN1_HUMAN	O95497	O95497	VNN1	Pantetheinase	5	0	M	PM						0.0230308
sp|Q9UM01|YLAT1_HUMAN	Q9UM01	Q9UM01	SLC7A7	Y+L amino acid transporter 1	5	0	M	PM						0.0225211
sp|P08631|HCK_HUMAN	P08631	P08631	HCK	Tyrosine-protein kinase HCK	6	0	M	PM				Nuc		0.0223877
sp|P15151|PVR_HUMAN	P15151	P15151	PVR	Poliovirus receptor	5	0	M	PM		CS	XC			0.0219906
sp|O75871|CEAM4_HUMAN	O75871	O75871	CEACAM4	Carcinoembryonic antigen-related cell adhesion molecule 4	2	0	M	PM						0.0218164
sp|Q01151|CD83_HUMAN	Q01151	Q01151	CD83	CD83 antigen	8	0	M	PM						0.020095
sp|Q9UPY5|XCT_HUMAN	Q9UPY5	Q9UPY5	SLC7A11	Cystine/glutamate transporter	6	0	M	PM		CS				0.0197617
sp|Q96BD0|SO4A1_HUMAN	Q96BD0	Q96BD0	SLCO4A1	Solute carrier organic anion transporter family member 4A1	10	0	M	PM						0.0197239
sp|Q00325|MPCP_HUMAN	Q00325	Q00325	SLC25A3	Phosphate carrier protein, mitochondrial	5	13	M	PM				Nuc		0.0193364
sp|O14786|NRP1_HUMAN	O14786	O14786	NRP1	Neuropilin-1	8	0	M	PM			XC			0.0191881
sp|Q9H813-2|TM206_HUMAN	Q9H813-2	Q9H813	TMEM206	Isoform 2 of Transmembrane protein 206	2	0	M			CS				0.0190565
sp|P25105|PTAFR_HUMAN	P25105	P25105	PTAFR	Platelet-activating factor receptor	2	0	M	PM						0.0176842
sp|P40925-3|MDHC_HUMAN	P40925-3	P40925	MDH1	Isoform 3 of Malate dehydrogenase, cytoplasmic	6	0					XC			0.0176672
sp|Q496F6|CLM2_HUMAN	Q496F6	Q496F6	CD300E	CMRF35-like molecule 2	4	0	M	PM						0.0172295
sp|P17301|ITA2_HUMAN	P17301	P17301	ITGA2	Integrin alpha-2	9	0	M	PM		CS				0.016699
sp|P16050|LOX15_HUMAN	P16050	P16050	ALOX15	Arachidonate 15-lipoxygenase	8	0	M	PM						0.0140364
sp|Q687X5|STEA4_HUMAN	Q687X5	Q687X5	STEAP4	Metalloreductase STEAP4	4	0	M	PM						0.0135882
sp|Q08708|CLM6_HUMAN	Q08708	Q08708	CD300C	CMRF35-like molecule 6	2	0	M	PM						0.013259
sp|Q9Y4D7|PLXD1_HUMAN	Q9Y4D7	Q9Y4D7	PLXND1	Plexin-D1	22	0	M	PM						0.0131151
sp|Q9H3S1|SEM4A_HUMAN	Q9H3S1	Q9H3S1	SEMA4A	Semaphorin-4A	8	0	M	PM			XC			0.0130207
sp|Q99572|P2RX7_HUMAN	Q99572	Q99572	P2RX7	P2X purinoceptor 7	8	0	M	PM						0.0129341
sp|P16109|LYAM3_HUMAN	P16109	P16109	SELP	P-selectin	6	0	M	PM			XC			0.0128558
sp|O00206|TLR4_HUMAN	O00206	O00206	TLR4	Toll-like receptor 4	5	0	M	PM		CS				0.0127169
sp|P49279|NRAM1_HUMAN	P49279	P49279	SLC11A1	Natural resistance-associated macrophage protein 1	2	0	M	PM						0.0124341
sp|P15813|CD1D_HUMAN	P15813	P15813	CD1D	Antigen-presenting glycoprotein CD1d	3	0	M	PM		CS				0.0118733
sp|P25025|CXCR2_HUMAN	P25025	P25025	CXCR2	C-X-C chemokine receptor type 2	4	0	M	PM		CS				0.0118486
sp|Q9H3T3|SEM6B_HUMAN	Q9H3T3	Q9H3T3	SEMA6B	Semaphorin-6B	9	0	M	PM						0.0117131
sp|Q7Z6M3|MILR1_HUMAN	Q7Z6M3	Q7Z6M3	MILR1	Allergin-1	6	0	M	PM						0.0114893
sp|Q9NQ25|SLAF7_HUMAN	Q9NQ25	Q9NQ25	SLAMF7	SLAM family member 7	6	0	M	PM						0.0113919
sp|Q99571-2|P2RX4_HUMAN	Q99571-2	Q99571	P2RX4	Isoform 2 of P2X purinoceptor 4	3	0	M	PM						0.0112837
sp|Q14162|SREC_HUMAN	Q14162	Q14162	SCARF1	Scavenger receptor class F member 1	4	0	M	PM						0.0112822
sp|Q0VD83-4|APOBR_HUMAN	Q0VD83-4	Q0VD83	APOBR	Isoform 4 of Apolipoprotein B receptor	1	0	M	PM						0.011197
sp|Q13443|ADAM9_HUMAN	Q13443	Q13443	ADAM9	Disintegrin and metalloproteinase domain-containing protein 9	6	0	M	PM		CS	XC			0.0110858
sp|Q5JXA9|SIRB2_HUMAN	Q5JXA9	Q5JXA9	SIRPB2	Signal-regulatory protein beta-2	6	0	M						ShG	0.0108162
sp|P78325|ADAM8_HUMAN	P78325	P78325	ADAM8	Disintegrin and metalloproteinase domain-containing protein 8	6	0	M	PM		CS				0.0107594
sp|Q9H015|S22A4_HUMAN	Q9H015	Q9H015	SLC22A4	Solute carrier family 22 member 4	4	0	M	PM						0.0107033
sp|P07333|CSF1R_HUMAN	P07333	P07333	CSF1R	Macrophage colony-stimulating factor 1 receptor	3	0	M	PM		CS				0.0106018
sp|O60462|NRP2_HUMAN	O60462	O60462	NRP2	Neuropilin-2	9	0	M	PM			XC			0.0105856
sp|O75144-2|ICOSL_HUMAN	O75144-2	O75144	ICOSLG	Isoform 2 of ICOS ligand	1	0	M	PM						0.0103447
sp|Q9UHX3|AGRE2_HUMAN	Q9UHX3	Q9UHX3	ADGRE2	Adhesion G protein-coupled receptor E2	5	0	M	PM						0.0101861
sp|P12314|FCGR1_HUMAN	P12314	P12314	FCGR1A	High affinity immunoglobulin gamma Fc receptor I	4	0	M	PM						0.0100004
sp|P51828|ADCY7_HUMAN	P51828	P51828	ADCY7	Adenylate cyclase type 7	6	0	M	PM						0.00996992
sp|O14944|EREG_HUMAN	O14944	O14944	EREG	Proepiregulin	1	0	M	PM			XC			0.00940582
sp|P29017|CD1C_HUMAN	P29017	P29017	CD1C	T-cell surface glycoprotein CD1c	2	0	M	PM						0.00912629
sp|Q96AP7|ESAM_HUMAN	Q96AP7	Q96AP7	ESAM	Endothelial cell-selective adhesion molecule	4	0	M	PM						0.00899183
sp|P14770|GPIX_HUMAN	P14770	P14770	GP9	Platelet glycoprotein IX	3	0	M	PM						0.00894491
sp|Q96LC7|SIG10_HUMAN	Q96LC7	Q96LC7	SIGLEC10	Sialic acid-binding Ig-like lectin 10	6	0	M	PM			XC			0.00893982
sp|P26951|IL3RA_HUMAN	P26951	P26951	IL3RA	Interleukin-3 receptor subunit alpha	5	0	M	PM						0.00881032
sp|Q04721|NOTC2_HUMAN	Q04721	Q04721	NOTCH2	Neurogenic locus notch homolog protein 2	17	0	M	PM		CS	XC	Nuc		0.00842533
sp|P28906|CD34_HUMAN	P28906	P28906	CD34	Hematopoietic progenitor cell antigen CD34	3	0	M	PM						0.0083576
sp|Q92956|TNR14_HUMAN	Q92956	Q92956	TNFRSF14	Tumor necrosis factor receptor superfamily member 14	1	0	M	PM						0.00826482
sp|P09769|FGR_HUMAN	P09769	P09769	FGR	Tyrosine-protein kinase Fgr	3	0	M	PM						0.00809927
sp|P25090|FPR2_HUMAN	P25090	P25090	FPR2	N-formyl peptide receptor 2	2	0	M	PM						0.0078164
sp|Q658P3-2|STEA3_HUMAN	Q658P3-2	Q658P3	STEAP3	Isoform 2 of Metalloreductase STEAP3	4	0	M	PM						0.00779134
sp|P06576|ATPB_HUMAN	P06576	P06576	ATP5B	ATP synthase subunit beta, mitochondrial	3	0	M	PM		CS		Nuc		0.00772564
sp|O00241|SIRB1_HUMAN	O00241	O00241	SIRPB1	Signal-regulatory protein beta-1	4	0	M	PM						0.00771712
sp|Q9H5V8|CDCP1_HUMAN	Q9H5V8	Q9H5V8	CDCP1	CUB domain-containing protein 1	2	0	M	PM			XC			0.00766268
sp|P00488|F13A_HUMAN	P00488	P00488	F13A1	Coagulation factor XIII A chain	3	0					XC			0.00759634
sp|Q12907|LMAN2_HUMAN	Q12907	Q12907	LMAN2	Vesicular integral-membrane protein VIP36	2	0	M	PM		CS	XC			0.00751254
sp|Q9H7M9|VISTA_HUMAN	Q9H7M9	Q9H7M9	C10orf54	V-type immunoglobulin domain-containing suppressor of T-cell activation	6	0	M	PM						0.0072059
sp|P51681|CCR5_HUMAN	P51681	P51681	CCR5	C-C chemokine receptor type 5	4	0	M	PM		CS				0.00713985
sp|P11717|MPRI_HUMAN	P11717	P11717	IGF2R	Cation-independent mannose-6-phosphate receptor	24	0	M	PM		CS				0.00705052
sp|Q9UBI6|GBG12_HUMAN	Q9UBI6	Q9UBI6	GNG12	Guanine nucleotide-binding protein G(I)/G(S)/G(O) subunit gamma-12	2	0	M	PM						0.00701008
sp|Q16581|C3AR_HUMAN	Q16581	Q16581	C3AR1	C3a anaphylatoxin chemotactic receptor	3	0	M	PM						0.00700769
sp|O00421-2|CCRL2_HUMAN	O00421-2	O00421	CCRL2	Isoform 2 of C-C chemokine receptor-like 2	2	0	M	PM						0.0069502
sp|P04233-2|HG2A_HUMAN	P04233-2	P04233	CD74	Isoform 2 of HLA class II histocompatibility antigen gamma chain	1	0	M	PM		CS				0.00678167
sp|Q9C0H2-4|TTYH3_HUMAN	Q9C0H2-4	Q9C0H2	TTYH3	Isoform 4 of Protein tweety homolog 3	3	0	M	PM						0.00657545
sp|Q9NY35|CLDN1_HUMAN	Q9NY35	Q9NY35	CLDND1	Claudin domain-containing protein 1	2	0	M			CS				0.00654517
sp|Q8N149|LIRA2_HUMAN	Q8N149	Q8N149	LILRA2	Leukocyte immunoglobulin-like receptor subfamily A member 2	3	0	M				XC			0.00638205
sp|P49019|HCAR3_HUMAN	P49019	P49019	HCAR3	Hydroxycarboxylic acid receptor 3	3	0	M	PM						0.00620282
sp|P27701|CD82_HUMAN	P27701	P27701	CD82	CD82 antigen	2	0	M	PM						0.00588985
sp|Q9P0L0-2|VAPA_HUMAN	Q9P0L0-2	Q9P0L0	VAPA	Isoform 2 of Vesicle-associated membrane protein-associated protein A	1	0	M	PM						0.00581239
sp|Q96TA1|NIBL1_HUMAN	Q96TA1	Q96TA1	FAM129B	Niban-like protein 1	5	0	M	PM				Nuc		0.00574295
sp|P31994|FCG2B_HUMAN	P31994	P31994	FCGR2B	Low affinity immunoglobulin gamma Fc region receptor II-b	2	0	M	PM						0.00564902
sp|P08581-2|MET_HUMAN	P08581-2	P08581	MET	Isoform 2 of Hepatocyte growth factor receptor	3	0	M	PM		CS	XC			0.00563706
sp|A8MVS5|HIDE1_HUMAN	A8MVS5	A8MVS5	HIDE1	Protein HIDE1	3	0	M						ShG	0.00556786
sp|O60602|TLR5_HUMAN	O60602	O60602	TLR5	Toll-like receptor 5	9	0	M	PM						0.00546737
sp|Q13444|ADA15_HUMAN	Q13444	Q13444	ADAM15	Disintegrin and metalloproteinase domain-containing protein 15	4	0	M	PM		CS				0.00533382
sp|Q6UWL2-2|SUSD1_HUMAN	Q6UWL2-2	Q6UWL2	SUSD1	Isoform 2 of Sushi domain-containing protein 1	4	0	M						ShG	0.00528484
sp|P51153|RAB13_HUMAN	P51153	P51153	RAB13	Ras-related protein Rab-13	3	0	M	PM						0.00526659
sp|P23469|PTPRE_HUMAN	P23469	P23469	PTPRE	Receptor-type tyrosine-protein phosphatase epsilon	5	0	M	PM				Nuc		0.00523799
sp|P53794|SC5A3_HUMAN	P53794	P53794	SLC5A3	Sodium/myo-inositol cotransporter	4	0	M	PM						0.00503875
sp|P02679|FIBG_HUMAN	P02679	P02679	FGG	Fibrinogen gamma chain	5	0	M	PM		CS	XC			0.00486713
sp|P17181|INAR1_HUMAN	P17181	P17181	IFNAR1	Interferon alpha/beta receptor 1	3	0	M	PM						0.00456117
sp|Q9NRA2|S17A5_HUMAN	Q9NRA2	Q9NRA2	SLC17A5	Sialin	2	0	M	PM						0.0044225
sp|P51572-2|BAP31_HUMAN	P51572-2	P51572	BCAP31	Isoform 2 of B-cell receptor-associated protein 31	3	0	M	PM						0.00436401
sp|O15118|NPC1_HUMAN	O15118	O15118	NPC1	Niemann-Pick C1 protein	4	0	M	PM			XC			0.00436103
sp|Q5ZPR3|CD276_HUMAN	Q5ZPR3	Q5ZPR3	CD276	CD276 antigen	2	0	M	PM						0.00435903
sp|O95866|G6B_HUMAN	O95866	O95866	G6B	Protein G6b	3	0	M	PM						0.00432309
sp|Q13201|MMRN1_HUMAN	Q13201	Q13201	MMRN1	Multimerin-1	8	0					XC			0.00410695
sp|Q12999|TSN31_HUMAN	Q12999	Q12999	TSPAN31	Tetraspanin-31	2	0	M	PM						0.00408126
sp|P15260|INGR1_HUMAN	P15260	P15260	IFNGR1	Interferon gamma receptor 1	2	0	M	PM						0.00406347
sp|P26572|MGAT1_HUMAN	P26572	P26572	MGAT1	Alpha-1,3-mannosyl-glycoprotein 2-beta-N-acetylglucosaminyltransferase	4	0	M				XC			0.00382685
sp|Q9Y2C9|TLR6_HUMAN	Q9Y2C9	Q9Y2C9	TLR6	Toll-like receptor 6	2	0	M	PM						0.00370525
sp|P22061-2|PIMT_HUMAN	P22061-2	P22061	PCMT1	Isoform 2 of Protein-L-isoaspartate(D-aspartate) O-methyltransferase	3	0					XC			0.00360732
sp|P48029|SC6A8_HUMAN	P48029	P48029	SLC6A8	Sodium- and chloride-dependent creatine transporter 1	4	0	M	PM						0.00357462
sp|Q9BY67-3|CADM1_HUMAN	Q9BY67-3	Q9BY67	CADM1	Isoform 3 of Cell adhesion molecule 1	1	0	M	PM						0.00354854
sp|P10721|KIT_HUMAN	P10721	P10721	KIT	Mast/stem cell growth factor receptor Kit	2	0	M	PM			XC			0.00349004
sp|P21589|5NTD_HUMAN	P21589	P21589	NT5E	5'-nucleotidase	3	0	M	PM		CS				0.00348474
sp|P11413-2|G6PD_HUMAN	P11413-2	P11413	G6PD	Isoform Long of Glucose-6-phosphate 1-dehydrogenase	5	0	M	PM				Nuc		0.00341776
sp|Q8TDU6|GPBAR_HUMAN	Q8TDU6	Q8TDU6	GPBAR1	G-protein coupled bile acid receptor 1	2	0	M	PM						0.003371
sp|O15144|ARPC2_HUMAN	O15144	O15144	ARPC2	Actin-related protein 2/3 complex subunit 2	1	0	M	PM						0.00328436
sp|P48047|ATPO_HUMAN	P48047	P48047	ATP5O	ATP synthase subunit O, mitochondrial	1	0	M	PM				Nuc		0.00321089
sp|P26012|ITB8_HUMAN	P26012	P26012	ITGB8	Integrin beta-8	4	0	M	PM		CS				0.00313264
sp|P02675|FIBB_HUMAN	P02675	P02675	FGB	Fibrinogen beta chain	3	0	M	PM		CS	XC			0.00297222
sp|Q08ET2|SIG14_HUMAN	Q08ET2	Q08ET2	SIGLEC14	Sialic acid-binding Ig-like lectin 14	2	0	M	PM						0.00293317
sp|Q9UBR2|CATZ_HUMAN	Q9UBR2	Q9UBR2	CTSZ	Cathepsin Z	1	0	M	PM			XC			0.00288475
sp|Q16842|SIA4B_HUMAN	Q16842	Q16842	ST3GAL2	CMP-N-acetylneuraminate-beta-galactosamide-alpha-2,3-sialyltransferase 2	1	0	M				XC			0.00287946
sp|Q8IX19|MCEM1_HUMAN	Q8IX19	Q8IX19	MCEMP1	Mast cell-expressed membrane protein 1	2	0	M						ShG	0.00277533
sp|P29466|CASP1_HUMAN	P29466	P29466	CASP1	Caspase-1	2	0					XC			0.002655
sp|Q9NPR9|GP108_HUMAN	Q9NPR9	Q9NPR9	GPR108	Protein GPR108	2	0	M						ShG	0.00264385
sp|Q8NHJ6-2|LIRB4_HUMAN	Q8NHJ6-2	Q8NHJ6	LILRB4	Isoform 2 of Leukocyte immunoglobulin-like receptor subfamily B member 4	3	0	M	PM						0.00260285
sp|P17927|CR1_HUMAN	P17927	P17927	CR1	Complement receptor type 1	8	0	M	PM		CS				0.00259215
sp|P51575|P2RX1_HUMAN	P51575	P51575	P2RX1	P2X purinoceptor 1	4	0	M	PM						0.00244963
sp|P20073|ANXA7_HUMAN	P20073	P20073	ANXA7	Annexin A7	3	0	M	PM				Nuc		0.00243421
sp|Q7Z7N9|T179B_HUMAN	Q7Z7N9	Q7Z7N9	TMEM179B	Transmembrane protein 179B	1	0	M						ShG	0.002431
sp|P30040|ERP29_HUMAN	P30040	P30040	ERP29	Endoplasmic reticulum resident protein 29	1	0	M			CS				0.0023805
sp|P21964|COMT_HUMAN	P21964	P21964	COMT	Catechol O-methyltransferase	1	0	M	PM						0.00234416
sp|Q9ULQ1-3|TPC1_HUMAN	Q9ULQ1-3	Q9ULQ1	TPCN1	Isoform 3 of Two pore calcium channel protein 1	2	0	M	PM						0.00233938
sp|O15162|PLS1_HUMAN	O15162	O15162	PLSCR1	Phospholipid scramblase 1	1	0	M	PM			XC	Nuc		0.00230941
sp|Q13873|BMPR2_HUMAN	Q13873	Q13873	BMPR2	Bone morphogenetic protein receptor type-2	2	0	M	PM		CS	XC			0.00227258
sp|P43003|EAA1_HUMAN	P43003	P43003	SLC1A3	Excitatory amino acid transporter 1	2	0	M	PM		CS				0.00226862
sp|P19022|CADH2_HUMAN	P19022	P19022	CDH2	Cadherin-2	4	0	M	PM						0.00224507
sp|P30679|GNA15_HUMAN	P30679	P30679	GNA15	Guanine nucleotide-binding protein subunit alpha-15	2	0	M	PM						0.00219363
sp|Q10472|GALT1_HUMAN	Q10472	Q10472	GALNT1	Polypeptide N-acetylgalactosaminyltransferase 1	2	0	M				XC			0.00219363
sp|P52907|CAZA1_HUMAN	P52907	P52907	CAPZA1	F-actin-capping protein subunit alpha-1	1	0					XC			0.00212877
sp|O95477|ABCA1_HUMAN	O95477	O95477	ABCA1	ATP-binding cassette sub-family A member 1	5	0	M	PM						0.00203062
sp|P84157-2|MXRA7_HUMAN	P84157-2	P84157	MXRA7	Isoform 2 of Matrix-remodeling-associated protein 7	1	0	M						ShG	0.00189325
sp|Q9HC73|CRLF2_HUMAN	Q9HC73	Q9HC73	CRLF2	Cytokine receptor-like factor 2	1	0	M	PM			XC			0.00189013
sp|Q9UP95|S12A4_HUMAN	Q9UP95	Q9UP95	SLC12A4	Solute carrier family 12 member 4	3	0	M	PM						0.00187518
sp|P78552|I13R1_HUMAN	P78552	P78552	IL13RA1	Interleukin-13 receptor subunit alpha-1	1	0	M	PM						0.00187241
sp|P13591|NCAM1_HUMAN	P13591	P13591	NCAM1	Neural cell adhesion molecule 1	1	0	M	PM		CS				0.00183843
sp|Q6PJF5|RHDF2_HUMAN	Q6PJF5	Q6PJF5	RHBDF2	Inactive rhomboid protein 2	1	0	M	PM						0.0017912
sp|Q14766-4|LTBP1_HUMAN	Q14766-4	Q14766	LTBP1	Isoform 4 of Latent-transforming growth factor beta-binding protein 1	4	0					XC			0.00177448
sp|P07948-2|LYN_HUMAN	P07948-2	P07948	LYN	Isoform 2 of Tyrosine-protein kinase Lyn	1	0	M	PM				Nuc		0.00173532
sp|P51511|MMP15_HUMAN	P51511	P51511	MMP15	Matrix metalloproteinase-15	1	0	M	PM			XC			0.00162604
sp|O75084|FZD7_HUMAN	O75084	O75084	FZD7	Frizzled-7	1	0	M	PM						0.00160454
sp|P20273|CD22_HUMAN	P20273	P20273	CD22	B-cell receptor CD22	2	0	M	PM						0.00160347
sp|Q9Y5Y0|FLVC1_HUMAN	Q9Y5Y0	Q9Y5Y0	FLVCR1	Feline leukemia virus subgroup C receptor-related protein 1	1	0	M	PM						0.00159692
sp|Q8TDW0|LRC8C_HUMAN	Q8TDW0	Q8TDW0	LRRC8C	Volume-regulated anion channel subunit LRRC8C	1	0	M	PM						0.00155621
sp|P35241-5|RADI_HUMAN	P35241-5	P35241	RDX	Isoform 5 of Radixin	2	0	M	PM			XC			0.00153817
sp|Q9UJU6|DBNL_HUMAN	Q9UJU6	Q9UJU6	DBNL	Drebrin-like protein	1	0	M	PM						0.00152994
sp|Q8WXI8|CLC4D_HUMAN	Q8WXI8	Q8WXI8	CLEC4D	C-type lectin domain family 4 member D	2	0	M	PM						0.00149732
sp|O75976|CBPD_HUMAN	O75976	O75976	CPD	Carboxypeptidase D	3	0	M				XC	Nuc		0.00138191
sp|O00161|SNP23_HUMAN	O00161	O00161	SNAP23	Synaptosomal-associated protein 23	1	0	M	PM						0.00135179
sp|Q14118|DAG1_HUMAN	Q14118	Q14118	DAG1	Dystroglycan	1	0	M	PM			XC			0.00133402
sp|Q99714|HCD2_HUMAN	Q99714	Q99714	HSD17B10	3-hydroxyacyl-CoA dehydrogenase type-2	1	0	M	PM						0.00131392
sp|P08567|PLEK_HUMAN	P08567	P08567	PLEK	Pleckstrin	1	0	M				XC			0.00130705
sp|O95274|LYPD3_HUMAN	O95274	O95274	LYPD3	Ly6/PLAUR domain-containing protein 3	1	0	M	PM			XC			0.00123936
sp|Q969Z4|TR19L_HUMAN	Q969Z4	Q969Z4	RELT	Tumor necrosis factor receptor superfamily member 19L	2	0	M	PM						0.00123928
sp|P01854|IGHE_HUMAN	P01854	P01854	IGHE	Ig epsilon chain C region	1	0	M	PM			XC			0.00121669
sp|Q96FQ6|S10AG_HUMAN	Q96FQ6	Q96FQ6	S100A16	Protein S100-A16	1	0	M	PM						0.00117246
sp|Q9BZW8|CD244_HUMAN	Q9BZW8	Q9BZW8	CD244	Natural killer cell receptor 2B4	1	0	M	PM						0.00114768
sp|Q9HCN6-3|GPVI_HUMAN	Q9HCN6-3	Q9HCN6	GP6	Isoform 3 of Platelet glycoprotein VI	1	0	M	PM		CS				0.00114658
sp|Q9UP38|FZD1_HUMAN	Q9UP38	Q9UP38	FZD1	Frizzled-1	1	0	M	PM		CS				0.00114102
sp|O15552|FFAR2_HUMAN	O15552	O15552	FFAR2	Free fatty acid receptor 2	4	0	M	PM						0.00112423
sp|P35625|TIMP3_HUMAN	P35625	P35625	TIMP3	Metalloproteinase inhibitor 3	1	0	M				XC	Nuc		0.00108863
sp|P32418|NAC1_HUMAN	P32418	P32418	SLC8A1	Sodium/calcium exchanger 1	2	0	M	PM						0.00106807
sp|Q9P258|RCC2_HUMAN	Q9P258	Q9P258	RCC2	Protein RCC2	1	0	M	PM						0.00106029
sp|P06744-2|G6PI_HUMAN	P06744-2	P06744	GPI	Isoform 2 of Glucose-6-phosphate isomerase	3	0	M	PM			XC			0.00105936
sp|P27105|STOM_HUMAN	P27105	P27105	STOM	Erythrocyte band 7 integral membrane protein	1	0	M	PM			XC			0.00104885
sp|Q03167|TGBR3_HUMAN	Q03167	Q03167	TGFBR3	Transforming growth factor beta receptor type 3	1	0	M	PM		CS	XC			0.00101839
sp|Q15833|STXB2_HUMAN	Q15833	Q15833	STXBP2	Syntaxin-binding protein 2	1	0	M	PM						0.00100097
sp|P00441|SODC_HUMAN	P00441	P00441	SOD1	Superoxide dismutase [Cu-Zn]	2	0	M				XC	Nuc		0.000990776
sp|P04632|CPNS1_HUMAN	P04632	P04632	CAPNS1	Calpain small subunit 1	1	0	M	PM						0.000983867
sp|Q5T3F8|CSCL2_HUMAN	Q5T3F8	Q5T3F8	TMEM63B	CSC1-like protein 2	1	0	M	PM						0.000962567
sp|Q29983|MICA_HUMAN	Q29983	Q29983	MICA	MHC class I polypeptide-related sequence A	1	0	M	PM		CS	XC			0.000961425
sp|Q9BXP2|S12A9_HUMAN	Q9BXP2	Q9BXP2	SLC12A9	Solute carrier family 12 member 9	2	0	M	PM						0.000956847
sp|Q9P2B2|FPRP_HUMAN	Q9P2B2	Q9P2B2	PTGFRN	Prostaglandin F2 receptor negative regulator	1	0	M			CS				0.000913624
sp|P36543|VATE1_HUMAN	P36543	P36543	ATP6V1E1	V-type proton ATPase subunit E 1	2	0	M	PM						0.000850929
sp|Q9UKY7|CDV3_HUMAN	Q9UKY7	Q9UKY7	CDV3	Protein CDV3 homolog	1	0	M	PM						0.00083675
sp|P25024|CXCR1_HUMAN	P25024	P25024	CXCR1	C-X-C chemokine receptor type 1	1	0	M	PM						0.000798095
sp|P09525|ANXA4_HUMAN	P09525	P09525	ANXA4	Annexin A4	1	0	M	PM		CS		Nuc		0.000772622
sp|Q07108|CD69_HUMAN	Q07108	Q07108	CD69	Early activation antigen CD69	1	0	M	PM						0.00073371
sp|Q15907|RB11B_HUMAN	Q15907	Q15907	RAB11B	Ras-related protein Rab-11B	2	0	M	PM						0.000723265
sp|P05413|FABPH_HUMAN	P05413	P05413	FABP3	Fatty acid-binding protein, heart	1	0					XC			0.000711779
sp|Q32MZ4|LRRF1_HUMAN	Q32MZ4	Q32MZ4	LRRFIP1	Leucine-rich repeat flightless-interacting protein 1	1	0	M	PM				Nuc		0.000696299
sp|O60637|TSN3_HUMAN	O60637	O60637	TSPAN3	Tetraspanin-3	1	0	M	PM						0.000690476
sp|Q9BZZ2|SN_HUMAN	Q9BZZ2	Q9BZZ2	SIGLEC1	Sialoadhesin	3	0	M	PM			XC			0.00066779
sp|P31641|SC6A6_HUMAN	P31641	P31641	SLC6A6	Sodium- and chloride-dependent taurine transporter	1	0	M	PM						0.000655986
sp|P43353|AL3B1_HUMAN	P43353	P43353	ALDH3B1	Aldehyde dehydrogenase family 3 member B1	1	0	M	PM						0.000654811
sp|P98196|AT11A_HUMAN	P98196	P98196	ATP11A	Probable phospholipid-transporting ATPase IH	1	0	M	PM						0.000654248
sp|Q96CT7|CC124_HUMAN	Q96CT7	Q96CT7	CCDC124	Coiled-coil domain-containing protein 124	1	0	M	PM						0.000652601
sp|Q9BXX0|EMIL2_HUMAN	Q9BXX0	Q9BXX0	EMILIN2	EMILIN-2	1	0					XC			0.000650872
sp|P54577|SYYC_HUMAN	P54577	P54577	YARS	Tyrosine--tRNA ligase, cytoplasmic	1	0					XC	Nuc		0.000648851
sp|P23141-2|EST1_HUMAN	P23141-2	P23141	CES1	Isoform 2 of Liver carboxylesterase 1	1	0					XC			0.000628901
sp|O75882|ATRN_HUMAN	O75882	O75882	ATRN	Attractin	2	0	M	PM			XC			0.000614982
sp|P47755|CAZA2_HUMAN	P47755	P47755	CAPZA2	F-actin-capping protein subunit alpha-2	1	0	M				XC			0.000584328
sp|P78380|OLR1_HUMAN	P78380	P78380	OLR1	Oxidized low-density lipoprotein receptor 1	1	0	M	PM						0.000566168
sp|P41231|P2RY2_HUMAN	P41231	P41231	P2RY2	P2Y purinoceptor 2	1	0	M	PM						0.0005542
sp|Q6P4Q7|CNNM4_HUMAN	Q6P4Q7	Q6P4Q7	CNNM4	Metal transporter CNNM4	1	0	M	PM						0.000552429
sp|Q15084-2|PDIA6_HUMAN	Q15084-2	Q15084	PDIA6	Isoform 2 of Protein disulfide-isomerase A6	1	0	M	PM						0.000518938
sp|P04275|VWF_HUMAN	P04275	P04275	VWF	von Willebrand factor	3	0	M	PM			XC			0.000459313
sp|P16234|PGFRA_HUMAN	P16234	P16234	PDGFRA	Platelet-derived growth factor receptor alpha	1	0	M	PM				Nuc		0.000434578
sp|Q9NRV9|HEBP1_HUMAN	Q9NRV9	Q9NRV9	HEBP1	Heme-binding protein 1	1	0					XC			0.000424541
sp|P09619|PGFRB_HUMAN	P09619	P09619	PDGFRB	Platelet-derived growth factor receptor beta	2	0	M	PM		CS		Nuc		0.000413944
sp|O00159|MYO1C_HUMAN	O00159	O00159	MYO1C	Unconventional myosin-Ic	2	0	M	PM						0.000408844
sp|P29317|EPHA2_HUMAN	P29317	P29317	EPHA2	Ephrin type-A receptor 2	2	0	M	PM		CS				0.000375226
sp|Q5W0Z9|ZDH20_HUMAN	Q5W0Z9	Q5W0Z9	ZDHHC20	Probable palmitoyltransferase ZDHHC20	1	0	M	PM						0.000372598
sp|Q9UHB6-4|LIMA1_HUMAN	Q9UHB6-4	Q9UHB6	LIMA1	Isoform 4 of LIM domain and actin-binding protein 1	2	0	M	PM						0.000356365
sp|A1A5C7|S22AN_HUMAN	A1A5C7	A1A5C7	SLC22A23	Solute carrier family 22 member 23	1	0	M	PM						0.000342331
sp|P46531|NOTC1_HUMAN	P46531	P46531	NOTCH1	Neurogenic locus notch homolog protein 1	1	0	M	PM		CS	XC	Nuc		0.000337277
sp|Q7KYR7|BT2A1_HUMAN	Q7KYR7	Q7KYR7	BTN2A1	Butyrophilin subfamily 2 member A1	1	0	M	PM						0.000315553
sp|Q14114|LRP8_HUMAN	Q14114	Q14114	LRP8	Low-density lipoprotein receptor-related protein 8	2	0	M	PM			XC			0.000311572
sp|P30874|SSR2_HUMAN	P30874	P30874	SSTR2	Somatostatin receptor type 2	1	0	M	PM						0.000302208
sp|Q8TCT8|SPP2A_HUMAN	Q8TCT8	Q8TCT8	SPPL2A	Signal peptide peptidase-like 2A	1	0	M	PM						0.000299839
sp|P43490|NAMPT_HUMAN	P43490	P43490	NAMPT	Nicotinamide phosphoribosyltransferase	1	0					XC			0.000297769
sp|Q9H223|EHD4_HUMAN	Q9H223	Q9H223	EHD4	EH domain-containing protein 4	1	0	M	PM				Nuc		0.000294334
sp|Q99623|PHB2_HUMAN	Q99623	Q99623	PHB2	Prohibitin-2	1	0	M			CS		Nuc		0.00029388
sp|P78324|SHPS1_HUMAN	P78324	P78324	SIRPA	Tyrosine-protein phosphatase non-receptor type substrate 1	1	0	M	PM						0.000288313
sp|Q00341|VIGLN_HUMAN	Q00341	Q00341	HDLBP	Vigilin	2	0	M	PM				Nuc		0.000283179
sp|P15121|ALDR_HUMAN	P15121	P15121	AKR1B1	Aldose reductase	1	0					XC			0.000279919
sp|Q9UPN3|MACF1_HUMAN	Q9UPN3	Q9UPN3	MACF1	Microtubule-actin cross-linking factor 1, isoforms 1/2/3/5	2	0	M	PM						0.000276875
sp|O00468|AGRIN_HUMAN	O00468	O00468	AGRN	Agrin	2	0	M	PM		CS	XC			0.000274403
sp|P13611|CSPG2_HUMAN	P13611	P13611	VCAN	Versican core protein	2	0	M				XC			0.000263523
sp|P98155|VLDLR_HUMAN	P98155	P98155	VLDLR	Very low-density lipoprotein receptor	2	0	M	PM		CS		Nuc		0.00026147
sp|Q92508|PIEZ1_HUMAN	Q92508	Q92508	PIEZO1	Piezo-type mechanosensitive ion channel component 1	2	0	M	PM						0.00025839
sp|P22694-2|KAPCB_HUMAN	P22694-2	P22694	PRKACB	Isoform 2 of cAMP-dependent protein kinase catalytic subunit beta	1	0	M	PM						0.000244456
sp|Q6PI73|LIRA6_HUMAN	Q6PI73	Q6PI73	LILRA6	Leukocyte immunoglobulin-like receptor subfamily A member 6	1	0	M						ShG	0.000234084
sp|Q9C0C4|SEM4C_HUMAN	Q9C0C4	Q9C0C4	SEMA4C	Semaphorin-4C	1	0	M				XC			0.000218957
sp|Q13418|ILK_HUMAN	Q13418	Q13418	ILK	Integrin-linked protein kinase	1	0	M	PM			XC			0.000209676
sp|P05067|A4_HUMAN	P05067	P05067	APP	Amyloid beta A4 protein	1	0	M	PM		CS	XC			0.000208469
sp|P05121|PAI1_HUMAN	P05121	P05121	SERPINE1	Plasminogen activator inhibitor 1	1	0	M	PM			XC			0.000200322
sp|Q13308-6|PTK7_HUMAN	Q13308-6	Q13308	PTK7	Isoform 6 of Inactive tyrosine-protein kinase 7	1	0	M	PM						0.000198294
sp|P48060|GLIP1_HUMAN	P48060	P48060	GLIPR1	Glioma pathogenesis-related protein 1	1	0	M	PM			XC			0.000184092
sp|Q9NZM1|MYOF_HUMAN	Q9NZM1	Q9NZM1	MYOF	Myoferlin	1	0	M	PM						0.000181751
sp|Q14195-2|DPYL3_HUMAN	Q14195-2	Q14195	DPYSL3	Isoform LCRMP-4 of Dihydropyrimidinase-related protein 3	1	0					XC			0.000173133
sp|P00533|EGFR_HUMAN	P00533	P00533	EGFR	Epidermal growth factor receptor	1	0	M	PM		CS	XC	Nuc		0.000169825
sp|P08473|NEP_HUMAN	P08473	P08473	MME	Neprilysin	1	0	M	PM						0.000167939
sp|O75054|IGSF3_HUMAN	O75054	O75054	IGSF3	Immunoglobulin superfamily member 3	1	0	M			CS				0.000156788
sp|Q92598-4|HS105_HUMAN	Q92598-4	Q92598	HSPH1	Isoform 4 of Heat shock protein 105 kDa	1	0					XC			0.000146261
sp|P11532|DMD_HUMAN	P11532	P11532	DMD	Dystrophin	1	0	M	PM		CS		Nuc		0.000133953
sp|P08069|IGF1R_HUMAN	P08069	P08069	IGF1R	Insulin-like growth factor 1 receptor	1	0	M	PM						0.00012032
sp|Q06481|APLP2_HUMAN	Q06481	Q06481	APLP2	Amyloid-like protein 2	1	0	M	PM				Nuc		9.93636e-05
sp|Q92673|SORL_HUMAN	Q92673	Q92673	SORL1	Sortilin-related receptor	1	0	M	PM			XC			9.5082e-05
sp|P49327|FAS_HUMAN	P49327	P49327	FASN	Fatty acid synthase	2	0	M	PM						8.07624e-05
sp|Q8WX93|PALLD_HUMAN	Q8WX93	Q8WX93	PALLD	Palladin	1	0	M	PM				Nuc		7.47632e-05
sp|O75581|LRP6_HUMAN	O75581	O75581	LRP6	Low-density lipoprotein receptor-related protein 6	1	0	M	PM		CS	XC			6.44969e-05
sp|P53396|ACLY_HUMAN	P53396	P53396	ACLY	ATP-citrate synthase	1	0	M	PM						5.17824e-05
sp|Q9HAR2|AGRL3_HUMAN	Q9HAR2	Q9HAR2	ADGRL3	Adhesion G protein-coupled receptor L3	1	0	M	PM						4.49906e-05
sp|O15018|PDZD2_HUMAN	O15018	O15018	PDZD2	PDZ domain-containing protein 2	1	0					XC	Nuc		2.75065e-05
sp|P07225|PROS_HUMAN	P07225	P07225	PROS1	Vitamin K-dependent protein S	0	6	M	PM			XC				4.61807
sp|P35542|SAA4_HUMAN	P35542	P35542	SAA4	Serum amyloid A-4 protein	0	16					XC				3.12051
sp|P14151-2|LYAM1_HUMAN	P14151-2	P14151	SELL	Isoform 2 of L-selectin	0	19	M	PM							1.9981
sp|P01876|IGHA1_HUMAN	P01876	P01876	IGHA1	Ig alpha-1 chain C region	0	29	M	PM			XC				1.7812
sp|P04234|CD3D_HUMAN	P04234	P04234	CD3D	T-cell surface glycoprotein CD3 delta chain	0	16	M	PM							1.56876
sp|P02655|APOC2_HUMAN	P02655	P02655	APOC2	Apolipoprotein C-II	0	10					XC				1.49048
sp|Q9Y3P8|SIT1_HUMAN	Q9Y3P8	Q9Y3P8	SIT1	Signaling threshold-regulating transmembrane adapter 1	0	13	M	PM							1.21838
sp|P01871-2|IGHM_HUMAN	P01871-2	P01871	IGHM	Isoform 2 of Ig mu chain C region	0	43	M	PM		CS	XC				1.17213
sp|P32121-4|ARRB2_HUMAN	P32121-4	P32121	ARRB2	Isoform 4 of Beta-arrestin-2	0	2	M	PM				Nuc			1.05908
sp|P02647|APOA1_HUMAN	P02647	P02647	APOA1	Apolipoprotein A-I	0	42	M	PM		CS	XC	Nuc			0.774838
sp|P08697|A2AP_HUMAN	P08697	P08697	SERPINF2	Alpha-2-antiplasmin	0	9				CS	XC				0.649721
sp|P27169|PON1_HUMAN	P27169	P27169	PON1	Serum paraoxonase/arylesterase 1	0	11	M				XC				0.503557
sp|P02649|APOE_HUMAN	P02649	P02649	APOE	Apolipoprotein E	0	27	M	PM			XC	Nuc			0.495841
sp|P09693|CD3G_HUMAN	P09693	P09693	CD3G	T-cell surface glycoprotein CD3 gamma chain	0	9	M	PM							0.486313
sp|P06729|CD2_HUMAN	P06729	P06729	CD2	T-cell surface antigen CD2	0	22	M	PM		CS	XC				0.479405
sp|P04004|VTNC_HUMAN	P04004	P04004	VTN	Vitronectin	0	14					XC				0.448715
sp|P04003|C4BPA_HUMAN	P04003	P04003	C4BPA	C4b-binding protein alpha chain	0	31	M	PM			XC				0.380712
sp|P05546|HEP2_HUMAN	P05546	P05546	SERPIND1	Heparin cofactor 2	0	25					XC				0.311772
sp|Q14761|PTCA_HUMAN	Q14761	Q14761	PTPRCAP	Protein tyrosine phosphatase receptor type C-associated protein	0	4	M	PM							0.309867
sp|P10747-7|CD28_HUMAN	P10747-7	P10747	CD28	Isoform 7 of T-cell-specific surface glycoprotein CD28	0	9	M	PM							0.30416
sp|P01848|TCA_HUMAN	P01848	P01848	TRAC	T-cell receptor alpha chain C region	0	5	M	PM							0.298896
sp|A0A5B9|TRBC2_HUMAN	A0A5B9	A0A5B9	TRBC2	T-cell receptor beta-2 chain C region	0	8	M						ShG		0.282425
sp|P01011|AACT_HUMAN	P01011	P01011	SERPINA3	Alpha-1-antichymotrypsin	0	16					XC	Nuc			0.276678
sp|P30203|CD6_HUMAN	P30203	P30203	CD6	T-cell differentiation antigen CD6	0	22	M	PM			XC				0.272024
sp|P01730|CD4_HUMAN	P01730	P01730	CD4	T-cell surface glycoprotein CD4	0	13	M	PM							0.259883
sp|P02748|CO9_HUMAN	P02748	P02748	C9	Complement component C9	0	18	M	PM			XC				0.211762
sp|P06239-3|LCK_HUMAN	P06239-3	P06239	LCK	Isoform 3 of Tyrosine-protein kinase Lck	0	17	M	PM							0.196316
sp|Q969H8|MYDGF_HUMAN	Q969H8	Q969H8	MYDGF	Myeloid-derived growth factor	0	2					XC				0.189344
sp|P04437|TVA2_HUMAN	P04437	P04437	TCRA	T-cell receptor alpha chain V region CTL-L17	0	7	M	PM							0.173702
sp|P19823|ITIH2_HUMAN	P19823	P19823	ITIH2	Inter-alpha-trypsin inhibitor heavy chain H2	0	28					XC				0.163768
sp|P02743|SAMP_HUMAN	P02743	P02743	APCS	Serum amyloid P-component	0	11					XC	Nuc			0.163102
sp|P02730|B3AT_HUMAN	P02730	P02730	SLC4A1	Band 3 anion transport protein	0	21	M	PM							0.149273
sp|P00739-2|HPTR_HUMAN	P00739-2	P00739	HPR	Isoform 2 of Haptoglobin-related protein	0	5					XC				0.143282
sp|P01024|CO3_HUMAN	P01024	P01024	C3	Complement C3	0	49	M	PM			XC				0.136162
sp|Q6UWD8|CP054_HUMAN	Q6UWD8	Q6UWD8	C16orf54	Transmembrane protein C16orf54	0	3	M						ShG		0.124562
sp|P01834|IGKC_HUMAN	P01834	P01834	IGKC	Ig kappa chain C region	0	5	M	PM			XC				0.123288
sp|O14745|NHRF1_HUMAN	O14745	O14745	SLC9A3R1	Na(+)/H(+) exchange regulatory cofactor NHE-RF1	0	15	M	PM							0.122828
sp|Q9Y6W8|ICOS_HUMAN	Q9Y6W8	Q9Y6W8	ICOS	Inducible T-cell costimulator	0	2	M	PM			XC				0.0956819
sp|P00751|CFAB_HUMAN	P00751	P00751	CFB	Complement factor B	0	22	M	PM			XC				0.0912602
sp|P04114|APOB_HUMAN	P04114	P04114	APOB	Apolipoprotein B-100	0	111	M	PM			XC				0.0905308
sp|P01008|ANT3_HUMAN	P01008	P01008	SERPINC1	Antithrombin-III	0	18	M	PM			XC				0.0816739
sp|P01733|TVB1_HUMAN	P01733	P01733	TRBV12-3	T-cell receptor beta chain V region YT35	0	3	M	PM							0.0777429
sp|P19827|ITIH1_HUMAN	P19827	P19827	ITIH1	Inter-alpha-trypsin inhibitor heavy chain H1	0	15					XC				0.0734803
sp|P01619|KV320_HUMAN	P01619	P01619	IGKV3-20	Immunoglobulin kappa variable 3-20	0	2	M	PM			XC				0.0675055
sp|P01737|TVA3_HUMAN	P01737	P01737	TRAV8-4	T-cell receptor alpha chain V region PY14	0	4	M	PM							0.0639151
sp|Q13790|APOF_HUMAN	Q13790	Q13790	APOF	Apolipoprotein F	0	3					XC				0.0576974
sp|Q14624|ITIH4_HUMAN	Q14624	Q14624	ITIH4	Inter-alpha-trypsin inhibitor heavy chain H4	0	19	M	PM			XC				0.0571918
sp|Q03135|CAV1_HUMAN	Q03135	Q03135	CAV1	Caveolin-1	0	3	M	PM		CS					0.0522111
sp|P09871|C1S_HUMAN	P09871	P09871	C1S	Complement C1s subcomponent	0	6					XC				0.051114
sp|P26010|ITB7_HUMAN	P26010	P26010	ITGB7	Integrin beta-7	0	12	M	PM		CS					0.0496893
sp|Q99795|GPA33_HUMAN	Q99795	Q99795	GPA33	Cell surface A33 antigen	0	7	M	PM							0.0439001
sp|P18428|LBP_HUMAN	P18428	P18428	LBP	Lipopolysaccharide-binding protein	0	4				CS	XC				0.0405892
sp|P69905|HBA_HUMAN	P69905	P69905	HBA1	Hemoglobin subunit alpha	0	3	M				XC				0.039769
sp|P0C0L4|CO4A_HUMAN	P0C0L4	P0C0L4	C4A	Complement C4-A	0	3	M	PM			XC				0.0394045
sp|P09429|HMGB1_HUMAN	P09429	P09429	HMGB1	High mobility group protein B1	0	3	M	PM		CS	XC	Nuc			0.0384473
sp|P11171|41_HUMAN	P11171	P11171	EPB41	Protein 4.1	0	22	M	PM				Nuc			0.0379722
sp|P01591|IGJ_HUMAN	P01591	P01591	JCHAIN	Immunoglobulin J chain	0	1					XC				0.0377389
sp|P00734|THRB_HUMAN	P00734	P00734	F2	Prothrombin	0	8	M	PM			XC				0.0375597
sp|P11049|CD37_HUMAN	P11049	P11049	CD37	Leukocyte antigen CD37	0	5	M	PM							0.0374646
sp|Q12918|KLRB1_HUMAN	Q12918	Q12918	KLRB1	Killer cell lectin-like receptor subfamily B member 1	0	2	M	PM							0.0345573
sp|B9A064|IGLL5_HUMAN	B9A064	B9A064	IGLL5	Immunoglobulin lambda-like polypeptide 5	0	3	M	PM							0.0289454
sp|P62834|RAP1A_HUMAN	P62834	P62834	RAP1A	Ras-related protein Rap-1A	0	4	M	PM							0.0265872
sp|P01023|A2MG_HUMAN	P01023	P01023	A2M	Alpha-2-macroglobulin	0	20					XC				0.0264568
sp|P26842|CD27_HUMAN	P26842	P26842	CD27	CD27 antigen	0	2	M	PM			XC	Nuc			0.0258545
sp|P11597|CETP_HUMAN	P11597	P11597	CETP	Cholesteryl ester transfer protein	0	4					XC				0.0252281
sp|P19652|A1AG2_HUMAN	P19652	P19652	ORM2	Alpha-1-acid glycoprotein 2	0	4					XC				0.0250538
sp|Q8NEQ5|CA162_HUMAN	Q8NEQ5	Q8NEQ5	C1orf162	Transmembrane protein C1orf162	0	1	M						ShG		0.0242518
sp|P04211|LV743_HUMAN	P04211	P04211	IGLV7-43	Immunoglobulin lambda variable 7-43	0	1	M	PM			XC				0.0238975
sp|P01019|ANGT_HUMAN	P01019	P01019	AGT	Angiotensinogen	0	2					XC				0.021058
sp|P22794-2|EVI2A_HUMAN	P22794-2	P22794	EVI2A	Isoform 2 of Protein EVI2A	0	2	M						ShG		0.0208483
sp|Q9H4E7|DEFI6_HUMAN	Q9H4E7	Q9H4E7	DEF6	Differentially expressed in FDCP 6 homolog	0	7	M	PM				Nuc			0.0206069
sp|P09564|CD7_HUMAN	P09564	P09564	CD7	T-cell antigen CD7	0	3	M	PM							0.0200991
sp|P43403|ZAP70_HUMAN	P43403	P43403	ZAP70	Tyrosine-protein kinase ZAP-70	0	7	M	PM							0.0187526
sp|Q96BF3|TMIG2_HUMAN	Q96BF3	Q96BF3	TMIGD2	Transmembrane and immunoglobulin domain-containing protein 2	0	3	M	PM							0.0183253
sp|Q96FE7|P3IP1_HUMAN	Q96FE7	Q96FE7	PIK3IP1	Phosphoinositide-3-kinase-interacting protein 1	0	2	M	PM			XC				0.0175171
sp|P78410|BT3A2_HUMAN	P78410	P78410	BTN3A2	Butyrophilin subfamily 3 member A2	0	4	M	PM							0.0171417
sp|O14791-2|APOL1_HUMAN	O14791-2	O14791	APOL1	Isoform 2 of Apolipoprotein L1	0	4	M				XC				0.0161906
sp|P17252|KPCA_HUMAN	P17252	P17252	PRKCA	Protein kinase C alpha type	0	6	M	PM							0.0158666
sp|Q96DR8|MUCL1_HUMAN	Q96DR8	Q96DR8	MUCL1	Mucin-like protein 1	0	1	M				XC				0.0145068
sp|P61769|B2MG_HUMAN	P61769	P61769	B2M	Beta-2-microglobulin	0	3	M	PM			XC				0.0144064
sp|P03952|KLKB1_HUMAN	P03952	P03952	KLKB1	Plasma kallikrein	0	11	M	PM			XC				0.0140612
sp|P06727|APOA4_HUMAN	P06727	P06727	APOA4	Apolipoprotein A-IV	0	5					XC				0.013932
sp|B7Z8K6|TRDC_HUMAN	B7Z8K6	B7Z8K6	TRDC	T-cell receptor delta chain C region	0	1	M	PM							0.0137041
sp|O60667|FAIM3_HUMAN	O60667	O60667	FCMR	Fas apoptotic inhibitory molecule 3	0	5	M				XC				0.0131959
sp|P37173-2|TGFR2_HUMAN	P37173-2	P37173	TGFBR2	Isoform 2 of TGF-beta receptor type-2	0	4	M	PM							0.0130395
sp|P08185|CBG_HUMAN	P08185	P08185	SERPINA6	Corticosteroid-binding globulin	0	2					XC				0.0129175
sp|Q07065|CKAP4_HUMAN	Q07065	Q07065	CKAP4	Cytoskeleton-associated protein 4	0	7	M	PM							0.0124563
sp|Q9UGM5|FETUB_HUMAN	Q9UGM5	Q9UGM5	FETUB	Fetuin-B	0	2					XC				0.0123623
sp|P26006|ITA3_HUMAN	P26006	P26006	ITGA3	Integrin alpha-3	0	5	M	PM		CS					0.0122899
sp|P29966|MARCS_HUMAN	P29966	P29966	MARCKS	Myristoylated alanine-rich C-kinase substrate	0	2	M	PM							0.0119137
sp|P53680|AP2S1_HUMAN	P53680	P53680	AP2S1	AP-2 complex subunit sigma	0	1	M	PM							0.0118082
sp|P06241|FYN_HUMAN	P06241	P06241	FYN	Tyrosine-protein kinase Fyn	0	2	M	PM				Nuc			0.0107613
sp|P49908|SEPP1_HUMAN	P49908	P49908	SEPP1	Selenoprotein P	0	2					XC				0.0107351
sp|P63167|DYL1_HUMAN	P63167	P63167	DYNLL1	Dynein light chain 1, cytoplasmic	0	1	M	PM				Nuc			0.00993243
sp|Q9UK55|ZPI_HUMAN	Q9UK55	Q9UK55	SERPINA10	Protein Z-dependent protease inhibitor	0	3					XC				0.00962874
sp|P16871|IL7RA_HUMAN	P16871	P16871	IL7R	Interleukin-7 receptor subunit alpha	0	4	M	PM			XC				0.00950957
sp|P08603|CFAH_HUMAN	P08603	P08603	CFH	Complement factor H	0	13					XC				0.00930523
sp|P21926|CD9_HUMAN	P21926	P21926	CD9	CD9 antigen	0	1	M	PM			XC				0.0091558
sp|P49795|RGS19_HUMAN	P49795	P49795	RGS19	Regulator of G-protein signaling 19	0	1	M	PM							0.0082354
sp|P49913|CAMP_HUMAN	P49913	P49913	CAMP	Cathelicidin antimicrobial peptide	0	1					XC				0.00773808
sp|Q8TDL5|BPIB1_HUMAN	Q8TDL5	Q8TDL5	BPIFB1	BPI fold-containing family B member 1	0	4					XC				0.00716397
sp|O14626|GP171_HUMAN	O14626	O14626	GPR171	Probable G-protein coupled receptor 171	0	2	M	PM							0.00682227
sp|Q06033|ITIH3_HUMAN	Q06033	Q06033	ITIH3	Inter-alpha-trypsin inhibitor heavy chain H3	0	2					XC				0.00676478
sp|Q14644|RASA3_HUMAN	Q14644	Q14644	RASA3	Ras GTPase-activating protein 3	0	5	M	PM							0.00656057
sp|O15117-3|FYB_HUMAN	O15117-3	O15117	FYB	Isoform 3 of FYN-binding protein	0	2	M	PM				Nuc			0.00642555
sp|Q9P1W8|SIRPG_HUMAN	Q9P1W8	Q9P1W8	SIRPG	Signal-regulatory protein gamma	0	2	M	PM							0.00640383
sp|Q13642-4|FHL1_HUMAN	Q13642-4	Q13642	FHL1	Isoform 4 of Four and a half LIM domains protein 1	0	2	M	PM				Nuc			0.00636024
sp|P02763|A1AG1_HUMAN	P02763	P02763	ORM1	Alpha-1-acid glycoprotein 1	0	3					XC				0.00631605
sp|P08123|CO1A2_HUMAN	P08123	P08123	COL1A2	Collagen alpha-2(I) chain	0	3					XC				0.00535832
sp|P21709|EPHA1_HUMAN	P21709	P21709	EPHA1	Ephrin type-A receptor 1	0	6	M	PM							0.00533866
sp|Q9H400|LIME1_HUMAN	Q9H400	Q9H400	LIME1	Lck-interacting transmembrane adapter 1	0	1	M	PM			XC				0.00490742
sp|Q8IYL9|PSYR_HUMAN	Q8IYL9	Q8IYL9	GPR65	Psychosine receptor	0	1	M	PM							0.00478421
sp|P02452|CO1A1_HUMAN	P02452	P02452	COL1A1	Collagen alpha-1(I) chain	0	8					XC				0.00473325
sp|Q9H665|IGFR1_HUMAN	Q9H665	Q9H665	IGFLR1	IGF-like family receptor 1	0	2	M	PM							0.00472284
sp|P22792|CPN2_HUMAN	P22792	P22792	CPN2	Carboxypeptidase N subunit 2	0	2					XC				0.0047136
sp|Q15438|CYH1_HUMAN	Q15438	Q15438	CYTH1	Cytohesin-1	0	2	M	PM							0.00455566
sp|P04278|SHBG_HUMAN	P04278	P04278	SHBG	Sex hormone-binding globulin	0	2					XC				0.00444592
sp|P08183|MDR1_HUMAN	P08183	P08183	ABCB1	Multidrug resistance protein 1	0	6	M	PM		CS					0.0044125
sp|Q9UHG3|PCYOX_HUMAN	Q9UHG3	Q9UHG3	PCYOX1	Prenylcysteine oxidase 1	0	2	M	PM							0.00423134
sp|P00742|FA10_HUMAN	P00742	P00742	F10	Coagulation factor X	0	1	M	PM			XC				0.00422621
sp|P19634|SL9A1_HUMAN	P19634	P19634	SLC9A1	Sodium/hydrogen exchanger 1	0	2	M	PM		CS					0.00411693
sp|A0FGR8-2|ESYT2_HUMAN	A0FGR8-2	A0FGR8	ESYT2	Isoform 2 of Extended synaptotagmin-2	0	3	M	PM							0.00358925
sp|Q96RT1-8|ERBIN_HUMAN	Q96RT1-8	Q96RT1	ERBIN	Isoform 8 of Erbin	0	5	M	PM				Nuc			0.00357334
sp|Q9NP59|S40A1_HUMAN	Q9NP59	Q9NP59	SLC40A1	Solute carrier family 40 member 1	0	1	M	PM							0.00333914
sp|Q9H2H9|S38A1_HUMAN	Q9H2H9	Q9H2H9	SLC38A1	Sodium-coupled neutral amino acid transporter 1	0	2	M	PM							0.00331228
sp|P12109|CO6A1_HUMAN	P12109	P12109	COL6A1	Collagen alpha-1(VI) chain	0	2	M				XC				0.00303479
sp|P32241-2|VIPR1_HUMAN	P32241-2	P32241	VIPR1	Isoform Long of Vasoactive intestinal polypeptide receptor 1	0	1	M	PM							0.00298923
sp|P12821|ACE_HUMAN	P12821	P12821	ACE	Angiotensin-converting enzyme	0	5	M	PM			XC				0.00298192
sp|P49773|HINT1_HUMAN	P49773	P49773	HINT1	Histidine triad nucleotide-binding protein 1	0	1	M	PM				Nuc			0.00287987
sp|P07766|CD3E_HUMAN	P07766	P07766	CD3E	T-cell surface glycoprotein CD3 epsilon chain	0	1	M	PM							0.00285465
sp|P20851|C4BPB_HUMAN	P20851	P20851	C4BPB	C4b-binding protein beta chain	0	2	M	PM			XC				0.00267803
sp|Q9NZH8|IL36G_HUMAN	Q9NZH8	Q9NZH8	IL36G	Interleukin-36 gamma	0	1					XC				0.00266434
sp|P22001|KCNA3_HUMAN	P22001	P22001	KCNA3	Potassium voltage-gated channel subfamily A member 3	0	2	M	PM							0.00262722
sp|Q8TCT9-2|HM13_HUMAN	Q8TCT9-2	Q8TCT9	HM13	Isoform 2 of Minor histocompatibility antigen H13	0	1	M	PM		CS					0.00260381
sp|P51178-2|PLCD1_HUMAN	P51178-2	P51178	PLCD1	Isoform 2 of 1-phosphatidylinositol 4,5-bisphosphate phosphodiesterase delta-1	0	1	M	PM							0.0025873
sp|Q14005|IL16_HUMAN	Q14005	Q14005	IL16	Pro-interleukin-16	0	4	M	PM			XC	Nuc			0.00252672
sp|Q9UGI8|TES_HUMAN	Q9UGI8	Q9UGI8	TES	Testin	0	2	M	PM				Nuc			0.00251878
sp|P01824|HV439_HUMAN	P01824	P01824	IGHV4-39	Immunoglobulin heavy variable 4-39	0	1	M	PM			XC				0.0025031
sp|Q86VZ1|P2RY8_HUMAN	Q86VZ1	Q86VZ1	P2RY8	P2Y purinoceptor 8	0	1	M	PM							0.00249103
sp|P54764|EPHA4_HUMAN	P54764	P54764	EPHA4	Ephrin type-A receptor 4	0	2	M	PM		CS					0.002377
sp|Q96CW1|AP2M1_HUMAN	Q96CW1	Q96CW1	AP2M1	AP-2 complex subunit mu	0	2	M	PM							0.00230585
sp|P23743|DGKA_HUMAN	P23743	P23743	DGKA	Diacylglycerol kinase alpha	0	3	M	PM							0.00229675
sp|P80108|PHLD_HUMAN	P80108	P80108	GPLD1	Phosphatidylinositol-glycan-specific phospholipase D	0	2	M				XC				0.0022549
sp|P08246|ELNE_HUMAN	P08246	P08246	ELANE	Neutrophil elastase	0	1				CS	XC				0.0021907
sp|P51858-3|HDGF_HUMAN	P51858-3	P51858	HDGF	Isoform 3 of Hepatoma-derived growth factor	0	1					XC				0.00205749
sp|O75828|CBR3_HUMAN	O75828	O75828	CBR3	Carbonyl reductase [NADPH] 3	0	1					XC				0.0019692
sp|P24723|KPCL_HUMAN	P24723	P24723	PRKCH	Protein kinase C eta type	0	1	M	PM							0.00194064
sp|Q92556|ELMO1_HUMAN	Q92556	Q92556	ELMO1	Engulfment and cell motility protein 1	0	1	M	PM							0.00193141
sp|Q9Y696|CLIC4_HUMAN	Q9Y696	Q9Y696	CLIC4	Chloride intracellular channel protein 4	0	1	M	PM		CS					0.00186719
sp|P00740|FA9_HUMAN	P00740	P00740	F9	Coagulation factor IX	0	1	M	PM			XC				0.00179781
sp|O75718|CRTAP_HUMAN	O75718	O75718	CRTAP	Cartilage-associated protein	0	2					XC				0.00178534
sp|Q9NWQ8|PHAG1_HUMAN	Q9NWQ8	Q9NWQ8	PAG1	Phosphoprotein associated with glycosphingolipid-enriched microdomains 1	0	1	M	PM							0.00175685
sp|Q9Y4F9|FA65B_HUMAN	Q9Y4F9	Q9Y4F9	FAM65B	Protein FAM65B	0	3	M	PM							0.0017136
sp|O75636|FCN3_HUMAN	O75636	O75636	FCN3	Ficolin-3	0	1					XC				0.00168847
sp|Q14254|FLOT2_HUMAN	Q14254	Q14254	FLOT2	Flotillin-2	0	2	M	PM							0.00166923
sp|P17655|CAN2_HUMAN	P17655	P17655	CAPN2	Calpain-2 catalytic subunit	0	1	M	PM				Nuc			0.00166021
sp|P40200|TACT_HUMAN	P40200	P40200	CD96	T-cell surface protein tactile	0	1	M	PM							0.00164958
sp|P07358|CO8B_HUMAN	P07358	P07358	C8B	Complement component C8 beta chain	0	2	M				XC				0.00159611
sp|O15197|EPHB6_HUMAN	O15197	O15197	EPHB6	Ephrin type-B receptor 6	0	2	M	PM			XC				0.00158066
sp|P04196|HRG_HUMAN	P04196	P04196	HRG	Histidine-rich glycoprotein	0	1	M	PM			XC				0.00151048
sp|P21796|VDAC1_HUMAN	P21796	P21796	VDAC1	Voltage-dependent anion-selective channel protein 1	0	1	M	PM				Nuc			0.00142836
sp|Q92859|NEO1_HUMAN	Q92859	Q92859	NEO1	Neogenin	0	1	M	PM							0.00134959
sp|Q8WUM4|PDC6I_HUMAN	Q8WUM4	Q8WUM4	PDCD6IP	Programmed cell death 6-interacting protein	0	1	M				XC				0.00126181
sp|Q86YV0|RASL3_HUMAN	Q86YV0	Q86YV0	RASAL3	RAS protein activator like-3	0	2	M	PM							0.0012351
sp|Q99808-2|S29A1_HUMAN	Q99808-2	Q99808	SLC29A1	Isoform 2 of Equilibrative nucleoside transporter 1	0	1	M	PM							0.00121985
sp|P15498|VAV_HUMAN	P15498	P15498	VAV1	Proto-oncogene vav	0	1	M	PM							0.00119477
sp|P40189|IL6RB_HUMAN	P40189	P40189	IL6ST	Interleukin-6 receptor subunit beta	0	2	M	PM			XC				0.00115531
sp|P98172|EFNB1_HUMAN	P98172	P98172	EFNB1	Ephrin-B1	0	1	M	PM				Nuc			0.00114835
sp|Q7LDG7-2|GRP2_HUMAN	Q7LDG7-2	Q7LDG7	RASGRP2	Isoform 2 of RAS guanyl-releasing protein 2	0	1	M	PM							0.00114684
sp|P55160|NCKPL_HUMAN	P55160	P55160	NCKAP1L	Nck-associated protein 1-like	0	2	M	PM							0.00113343
sp|Q13478|IL18R_HUMAN	Q13478	Q13478	IL18R1	Interleukin-18 receptor 1	0	1	M	PM							0.00113168
sp|O43566-5|RGS14_HUMAN	O43566-5	O43566	RGS14	Isoform 3 of Regulator of G-protein signaling 14	0	1	M	PM				Nuc			0.00111651
sp|P24821|TENA_HUMAN	P24821	P24821	TNC	Tenascin	0	3	M				XC				0.00110645
sp|Q9BXI6-2|TB10A_HUMAN	Q9BXI6-2	Q9BXI6	TBC1D10A	Isoform 2 of TBC1 domain family member 10A	0	1	M	PM							0.00110076
sp|Q15223|NECT1_HUMAN	Q15223	Q15223	NECTIN1	Nectin-1	0	1	M	PM			XC				0.00109903
sp|P23229-6|ITA6_HUMAN	P23229-6	P23229	ITGA6	Isoform Alpha-6X1X2A of Integrin alpha-6	0	1	M	PM		CS					0.00102736
sp|Q32P28-3|P3H1_HUMAN	Q32P28-3	Q32P28	P3H1	Isoform 3 of Prolyl 3-hydroxylase 1	0	1	M				XC	Nuc			0.000983779
sp|P55145|MANF_HUMAN	P55145	P55145	MANF	Mesencephalic astrocyte-derived neurotrophic factor	0	1					XC	Nuc			0.000867869
sp|P46459|NSF_HUMAN	P46459	P46459	NSF	Vesicle-fusing ATPase	0	1	M	PM							0.000841404
sp|P04436|TVA1_HUMAN	P04436	P04436	TRAV19	T-cell receptor alpha chain V region HPB-MLT (Fragment)	0	1	M	PM							0.000831758
sp|Q13813-2|SPTN1_HUMAN	Q13813-2	Q13813	SPTAN1	Isoform 2 of Spectrin alpha chain, non-erythrocytic 1	0	3	M	PM			XC				0.00077608
sp|P08519|APOA_HUMAN	P08519	P08519	LPA	Apolipoprotein(a)	0	1					XC				0.0006457
sp|P29622|KAIN_HUMAN	P29622	P29622	SERPINA4	Kallistatin	0	1					XC				0.00061891
sp|P50895|BCAM_HUMAN	P50895	P50895	BCAM	Basal cell adhesion molecule	0	2	M	PM							0.000552764
sp|P18510-3|IL1RA_HUMAN	P18510-3	P18510	IL1RN	Isoform 3 of Interleukin-1 receptor antagonist protein	0	1	M	PM			XC				0.000502082
sp|Q9HBG7|LY9_HUMAN	Q9HBG7	Q9HBG7	LY9	T-lymphocyte surface antigen Ly-9	0	1	M	PM							0.000470162
sp|Q92888-4|ARHG1_HUMAN	Q92888-4	Q92888	ARHGEF1	Isoform 4 of Rho guanine nucleotide exchange factor 1	0	1	M	PM							0.000450694
sp|P00748|FA12_HUMAN	P00748	P00748	F12	Coagulation factor XII	0	1	M	PM			XC				0.000437706
sp|P13671|CO6_HUMAN	P13671	P13671	C6	Complement component C6	0	1	M				XC				0.000423579
sp|Q9H2K8|TAOK3_HUMAN	Q9H2K8	Q9H2K8	TAOK3	Serine/threonine-protein kinase TAO3	0	1	M	PM				Nuc			0.000402885
sp|Q99829|CPNE1_HUMAN	Q99829	Q99829	CPNE1	Copine-1	0	1	M	PM				Nuc			0.000391904
sp|Q14160-3|SCRIB_HUMAN	Q14160-3	Q14160	SCRIB	Isoform 3 of Protein scribble homolog	0	1	M	PM							0.000382145
sp|Q02487|DSC2_HUMAN	Q02487	Q02487	DSC2	Desmocollin-2	0	1	M	PM							0.000357569
sp|O95782|AP2A1_HUMAN	O95782	O95782	AP2A1	AP-2 complex subunit alpha-1	0	1	M	PM							0.000299632
sp|P23142|FBLN1_HUMAN	P23142	P23142	FBLN1	Fibulin-1	0	1	M				XC				0.000293274
sp|Q93084-5|AT2A3_HUMAN	Q93084-5	Q93084	ATP2A3	Isoform SERCA3E of Sarcoplasmic/endoplasmic reticulum calcium ATPase 3	0	1	M	PM							0.000252565
sp|O60437|PEPL_HUMAN	O60437	O60437	PPL	Periplakin	0	1	M	PM				Nuc			0.000161297
sp|P01031|CO5_HUMAN	P01031	P01031	C5	Complement C5	0	1	M				XC				8.16265e-05
