# Supplementary material for: Comparative Cell Surface Proteomic Analysis of the Primary Human T Cell and Monocyte Responses to Type I Interferon
Source: Front Immunol. 2021 Feb 8;12:600056. doi: 10.3389/fimmu.2021.600056 (PMC7897682; doi:10.3389/fimmu.2021.600056)
Supplement: Supplementary file 5 [file Table_4.xlsx]

## Sheet: S4A
Proteins modulated by IFNα in primary CD14+ monocytes and CD4+ T cells.
		CD14+ Monocytes		CD4+ T cells
		Upregulated	Downregulated	Upregulated	Downregulated
	Average FC > 1 SD from mean	57	65	42	45
	Consistently modulated proteins	41	55	13	14
	(average FC > 1 SD from mean, and FC > 1 in all donors for upregulation, FC <1 in all donors for downregulation)
	Consistently modulated proteins with a Benjamini-Hochberg corrected p-value < 0.05	21	30	0	0

## Sheet: S4B - CD14+ Monocytes Up
Proteins upregulated at the cell surface by IFNa2a in primary CD14+ Monocytes
Proteins are upregulated according to the criteria described in the text, of average fold change > 1 SD from mean and FC > 1 in all donors.
The fold change is given as (abundance in sample stimulated with IFNa2a) / (abundance in unstimulated sample)
' - ' indicates that there was no data meeting the filtering criteria (described in methods) for the given donor
P values are calculated on log (LN) transfromed data, with a paird two-tailed t-test, and corrected for multiple hypotheses using the Benjamini-Hochberg method.
Uniprot-L	Uniprot-S	Gene Symbol	Description	Average Fold Change	Donor 1 Fold Change	Donor 2 Fold Change	Donor 3 Fold Change	Donor 4 Fold Change	Donor 5 Fold Change	BH corrected p-value
P30874	P30874	SSTR2	Somatostatin receptor type 2	7.61858	-	-	7.99103	5.93145	8.93328	0.0392608
Q07108	Q07108	CD69	Early activation antigen CD69	4.28656	2.58745	4.68282	8.84387	2.83648	2.48215	0.0489598
Q9NQ25	Q9NQ25	SLAMF7	SLAM family member 7	4.06001	4.7177	-	5.30119	2.50424	3.71689	0.0392608
P28907	P28907	CD38	ADP-ribosyl cyclase/cyclic ADP-ribose hydrolase 1	3.87849	2.54251	3.68068	5.93722	4.67603	2.55601	0.0310062
O15552	O15552	FFAR2	Free fatty acid receptor 2	3.68781	3.34948	5.97613	2.88057	3.23024	3.00264	0.023365
Q10589	Q10589	BST2	Bone marrow stromal antigen 2	3.6372	4.59441	5.70156	1.99543	3.33686	2.55773	0.0378408
P05161	P05161	ISG15	Ubiquitin-like protein ISG15	3.29767	2.90719	3.93614	3.4072	2.6065	3.63133	0.014283
P25942	P25942	CD40	Tumor necrosis factor receptor superfamily member 5	2.55388	1.74142	2.28532	5.01131	1.88332	1.84804	0.0825228
Q9H3S1	Q9H3S1	SEMA4A	Semaphorin-4A	2.52645	1.87631	3.31189	2.2221	3.46016	1.76177	0.0378408
P13762	P13762	HLA-DRB4	HLA class II histocompatibility antigen, DR beta 4 chain	2.44819	-	2.69066	2.99168	1.66224	-	0.169292
Q8NHJ6-2	Q8NHJ6	LILRB4	Isoform 2 of Leukocyte immunoglobulin-like receptor subfamily B member 4	2.42959	1.33384	3.11409	3.86077	1.95522	1.88403	0.0825228
Q9BZZ2	Q9BZZ2	SIGLEC1	Sialoadhesin	2.40751	2.09674	3.55502	2.52634	1.89107	1.96836	0.0320445
Q13291-4	Q13291	SLAMF1	Isoform 4 of Signaling lymphocytic activation molecule	2.40509	-	-	2.97227	1.78503	2.45798	0.14084
P01589	P01589	IL2RA	Interleukin-2 receptor subunit alpha	2.40282	4.30397	-	-	1.32764	1.57686	0.409424
Q01151	Q01151	CD83	CD83 antigen	2.29219	2.44006	3.3148	1.88125	2.21381	1.61103	0.0375648
Q8NHJ6-3	Q8NHJ6	LILRB4	Isoform 3 of Leukocyte immunoglobulin-like receptor subfamily B member 4	2.23099	1.999	2.25638	2.48429	2.29204	2.12324	0.00528188
Q9NZQ7	Q9NZQ7	CD274	Programmed cell death 1 ligand 1	2.21213	2.66391	-	2.77636	1.43707	1.97117	0.0939092
P17066	P17066	HSPA6	Heat shock 70 kDa protein 6	2.14227	1.38538	1.1396	2.22524	2.02468	3.93645	0.156281
		HLA-A	HLA class I histocompatibility antigen (HLA-A) combined data	2.10415	1.90137	2.33341	2.10638	2.14612	2.03349	0.00528188
		HLA-B	HLA class I histocompatibility antigen (HLA-B) combined data	2.07494	1.81933	2.48115	1.84663	2.14563	2.08196	0.0185132
P32248	P32248	CCR7	C-C chemokine receptor type 7	2.0696	2.11036	2.22264	2.33456	1.65554	2.02488	0.0188198
Q8N131	Q8N131	TMEM123	Porimin	2.05382	2.33581	2.79699	1.65671	2.12079	1.3588	0.0507544
P30511-3	P30511	HLA-F	Isoform 3 of HLA class I histocompatibility antigen, alpha chain F	2.01614	1.81278	2.30928	2.01688	2.27164	1.67011	0.0203337
		HLA-DRB1	HLA class II histocompatibility antigen (HLA-DRB1) combined data	1.92259	1.65825	2.66746	1.52004	1.70975	2.05746	0.0378408
O43852-4	O43852	CALU	Isoform 4 of Calumenin	1.89653	1.52506	1.06043	2.04388	2.95675	-	0.253721
P01903	P01903	HLA-DRA	HLA class II histocompatibility antigen, DR alpha chain	1.86742	1.9594	2.45994	1.08571	1.65463	2.17744	0.0902376
P13747	P13747	HLA-E	HLA class I histocompatibility antigen, alpha chain E	1.82414	1.62053	2.43137	1.61558	1.93145	1.52176	0.0358788
Q6PI73	Q6PI73	LILRA6	Leukocyte immunoglobulin-like receptor subfamily A member 6	1.80884	2.22518	2.72245	1.44693	1.29376	1.35587	0.114156
P79483	P79483	HLA-DRB3	HLA class II histocompatibility antigen, DR beta 3 chain	1.78592	1.86846	-	1.27719	2.04195	1.95607	0.0860592
Q9C0K1	Q9C0K1	SLC39A8	Zinc transporter ZIP8	1.75995	1.55729	2.3199	1.05346	1.1858	2.68331	0.193105
P20273	P20273	CD22	B-cell receptor CD22	1.75556	1.77048	2.71041	1.63178	1.53403	1.13107	0.112422
P51681	P51681	CCR5	C-C chemokine receptor type 5	1.69981	1.05621	1.30271	1.83142	2.6089	-	0.279308
		HLA-C	HLA class I histocompatibility antigen (HLA-C) combined data	1.67572	1.48444	1.85197	1.72729	1.77893	1.53596	0.0188198
Q6E0U4	Q6E0U4	DMKN	Dermokine	1.65311	2.4276	1.69892	1.37786	1.52585	1.23532	0.0917226
Q13873	Q13873	BMPR2	Bone morphogenetic protein receptor type-2	1.63501	1.68	2.37197	1.34438	1.47879	1.29991	0.0825228
Q9NQS5	Q9NQS5	GPR84	G-protein coupled receptor 84	1.63071	1.92308	2.33041	1.20802	1.16449	1.52752	0.137129
P25445	P25445	FAS	Tumor necrosis factor receptor superfamily member 6	1.57556	1.11177	1.83912	2.10415	1.49214	1.33062	0.106937
P42081	P42081	CD86	T-lymphocyte activation antigen CD86	1.5565	1.03024	1.93535	2.15175	1.44392	1.22124	0.170926
P04440	P04440	HLA-DPB1	HLA class II histocompatibility antigen, DP beta 1 chain	1.55554	1.61277	1.97559	1.2226	1.46769	1.49905	0.047771
P04839	P04839	CYBB	Cytochrome b-245 heavy chain	1.5312	1.41796	1.86318	1.43506	1.33725	1.60253	0.0332514
Q8N423	Q8N423	LILRB2	Leukocyte immunoglobulin-like receptor subfamily B member 2	1.52231	1.46084	1.73666	1.51752	1.5822	1.31434	0.0238721

## Sheet: S4C - CD14+ Monoctyes Down
Proteins downregulated at the cell surface by IFNa2a in primary CD14+ Monocytes
Proteins are downregulated according to the the criteria described in the text, of average fold change > 1 SD from mean and FC < 1 in all donors.
The fold change is given as (abundance in sample stimulated with IFNa2a) / (abundance in unstimulated sample)
' - ' indicates that there was no data meeting the filtering criteria (described in methods) for the given donor
P values are calculated on log (LN) transfromed data, with a paird two-tailed t-test, and corrected for multiple hypotheses using the Benjamini-Hochberg method.
Uniprot-L	Uniprot-S	Gene Symbol	Description	Average Fold Change	Donor 1 Fold Change	Donor 2 Fold Change	Donor 3 Fold Change	Donor 4 Fold Change	Donor 5 Fold Change	BH corrected p-value
Q92896-2	Q92896	GLG1	Isoform 2 of Golgi apparatus protein 1	0.731491	0.734721	0.89483	0.850945	0.722607	0.454352	0.1806
P23469	P23469	PTPRE	Receptor-type tyrosine-protein phosphatase epsilon	0.726756	0.784183	0.860108	0.581645	0.662421	0.745424	0.0635531
P58335	P58335	ANTXR2	Anthrax toxin receptor 2	0.72627	0.777088	0.842155	0.51832	0.744142	0.749647	0.0965473
P53794	P53794	SLC5A3	Sodium/myo-inositol cotransporter	0.709281	0.604931	0.457082	0.766157	0.731131	0.987103	0.170926
P16234	P16234	PDGFRA	Platelet-derived growth factor receptor alpha	0.70831	0.663656	0.781645	0.804913	0.583025	-	0.103455
P13224-2	P13224	GP1BB	Isoform 2 of Platelet glycoprotein Ib beta chain	0.706466	0.630098	0.396877	0.960751	0.856169	0.688435	0.219502
P15144	P15144	ANPEP	Aminopeptidase N	0.6959	0.528133	0.72317	0.627163	0.900662	0.700374	0.0825228
P17181	P17181	IFNAR1	Interferon alpha/beta receptor 1	0.682568	0.535566	0.870878	0.692682	0.694615	0.619097	0.0594168
P06213	P06213	INSR	Insulin receptor	0.680302	0.681904	0.763948	0.618945	0.518789	0.817922	0.0594168
Q9P2B2	Q9P2B2	PTGFRN	Prostaglandin F2 receptor negative regulator	0.677254	0.482471	0.881912	0.818695	0.525938	-	0.233475
Q9NPR2	Q9NPR2	SEMA4B	Semaphorin-4B	0.676237	0.509199	0.844191	0.742906	0.725996	0.558891	0.0825228
Q9H7F0	Q9H7F0	ATP13A3	Probable cation-transporting ATPase 13A3	0.674083	0.6401	0.698111	0.608391	0.594633	0.829179	0.0373297
P11169	P11169	SLC2A3	Solute carrier family 2, facilitated glucose transporter member 3	0.672428	0.775166	0.657144	0.536248	0.574593	0.818988	0.0594168
P05556	P05556	ITGB1	Integrin beta-1	0.672297	0.573412	0.694576	0.746993	0.702678	0.643825	0.0249525
P48029	P48029	SLC6A8	Sodium- and chloride-dependent creatine transporter 1	0.669811	0.768629	0.731494	0.448224	0.626987	0.773723	0.0917226
P46531	P46531	NOTCH1	Neurogenic locus notch homolog protein 1	0.667816	0.572799	0.661259	0.605978	0.744842	0.754201	0.0310062
Q9Y6M7-13	Q9Y6M7	SLC4A7	Isoform 13 of Sodium bicarbonate cotransporter 3	0.656322	0.627271	0.649673	0.610632	0.626837	0.767196	0.0214328
Q14956	Q14956	GPNMB	Transmembrane glycoprotein NMB	0.654586	0.528798	0.709143	0.601148	0.767299	0.66654	0.0373297
P12318	P12318	FCGR2A	Low affinity immunoglobulin gamma Fc region receptor II-a	0.650675	0.737734	0.74542	0.521203	0.575283	0.673738	0.0378408
P13987	P13987	CD59	CD59 glycoprotein	0.639261	0.583667	0.600402	0.988786	0.459074	0.564378	0.10605
P24071	P24071	FCAR	Immunoglobulin alpha Fc receptor	0.631989	0.408378	0.630317	0.798544	0.714334	0.608374	0.0842273
Q9C0C4	Q9C0C4	SEMA4C	Semaphorin-4C	0.625028	0.86658	0.844669	0.390716	0.490031	0.533142	0.14084
Q03405	Q03405	PLAUR	Urokinase plasminogen activator surface receptor	0.621678	0.351295	0.38328	0.97596	0.587587	0.810266	0.190957
P25090	P25090	FPR2	N-formyl peptide receptor 2	0.619617	0.682007	0.576884	0.509217	0.78009	0.549885	0.0378408
P98155	P98155	VLDLR	Very low-density lipoprotein receptor	0.614278	0.974492	0.588164	0.474817	0.506055	0.527863	0.0936411
P48060	P48060	GLIPR1	Glioma pathogenesis-related protein 1	0.60259	0.570593	0.443999	0.674295	0.664605	0.659456	0.0375648
Q8N370-3	Q8N370	SLC43A2	Isoform 3 of Large neutral amino acids transporter small subunit 4	0.599464	0.573445	0.635182	0.461979	0.681932	0.644783	0.0310062
Q9UPY5	Q9UPY5	SLC7A11	Cystine/glutamate transporter	0.595011	0.627929	0.633624	0.446795	0.511476	0.75523	0.0414459
P02656	P02656	APOC3	Apolipoprotein C-III	0.576453	0.598994	0.613492	0.516874	-	-	0.0674352
Q16842	Q16842	ST3GAL2	CMP-N-acetylneuraminate-beta-galactosamide-alpha-2,3-sialyltransferase 2	0.575431	0.382174	0.52083	0.752535	0.819795	0.401819	0.103705
P08581-2	P08581	MET	Isoform 2 of Hepatocyte growth factor receptor	0.57086	0.516287	0.482709	0.338125	0.587066	0.930113	0.107959
P08571	P08571	CD14	Monocyte differentiation antigen CD14	0.555986	0.594616	0.56242	0.467478	0.642246	0.513172	0.0203337
Q9NPH3	Q9NPH3	IL1RAP	Interleukin-1 receptor accessory protein	0.538453	0.617273	0.666445	0.448401	0.41071	0.549434	0.0358788
Q7Z7N9	Q7Z7N9	TMEM179B	Transmembrane protein 179B	0.533759	0.581134	0.671862	0.482536	0.511398	0.421865	0.0308586
Q9HC73	Q9HC73	CRLF2	Cytokine receptor-like factor 2	0.523128	0.665101	0.326787	0.356892	0.719672	0.547187	0.0825228
P32249	P32249	GPR183	G-protein coupled receptor 183	0.518655	0.496532	0.544519	0.402687	0.552554	0.596983	0.022794
P21730	P21730	C5AR1	C5a anaphylatoxin chemotactic receptor 1	0.515733	0.410421	0.542649	0.322245	0.659157	0.644193	0.0584444
O43493	O43493	TGOLN2	Trans-Golgi network integral membrane protein 2	0.515529	0.743983	0.439804	0.308481	0.621349	0.464028	0.0679916
Q496F6	Q496F6	CD300E	CMRF35-like molecule 2	0.498286	0.343021	0.584249	0.385394	0.526152	0.652616	0.0412042
P08637	P08637	FCGR3A	Low affinity immunoglobulin gamma Fc region receptor III-A	0.455615	0.398627	0.545698	0.433468	0.611715	0.288568	0.0378408
P07333	P07333	CSF1R	Macrophage colony-stimulating factor 1 receptor	0.442961	0.338483	0.451301	0.436622	0.581979	0.406422	0.023365
Q6UWB1	Q6UWB1	IL27RA	Interleukin-27 receptor subunit alpha	0.430014	0.46032	0.454461	0.402284	0.482881	0.350124	0.0146595
P21589	P21589	NT5E	5'-nucleotidase	0.42229	0.374459	0.567901	0.377117	0.366268	0.425704	0.0203337
P11166	P11166	SLC2A1	Solute carrier family 2, facilitated glucose transporter member 1	0.418448	0.549454	0.379722	0.24962	0.338276	0.575165	0.0412042
P13611	P13611	VCAN	Versican core protein	0.40799	0.2659	0.371777	0.335736	0.774919	0.291618	0.0574378
Q07954	Q07954	LRP1	Prolow-density lipoprotein receptor-related protein 1	0.396063	0.442984	0.409669	0.3989	0.349553	0.379207	0.00528188
P10721	P10721	KIT	Mast/stem cell growth factor receptor Kit	0.392364	0.381957	0.308768	0.405982	0.521236	0.343878	0.0203337
O95477	O95477	ABCA1	ATP-binding cassette sub-family A member 1	0.37697	0.276291	0.362743	0.266266	0.491417	0.488131	0.0310062
O14786	O14786	NRP1	Neuropilin-1	0.35049	0.260282	0.298735	0.264475	0.51438	0.414575	0.0308586
P31994	P31994	FCGR2B	Low affinity immunoglobulin gamma Fc region receptor II-b	0.320379	0.384933	0.206091	0.422142	0.176506	0.412223	0.0378408
Q9H5V8	Q9H5V8	CDCP1	CUB domain-containing protein 1	0.290979	0.241235	-	0.208553	0.287665	0.426464	0.0392608
Q9NY25	Q9NY25	CLEC5A	C-type lectin domain family 5 member A	0.287513	0.196291	0.16779	0.33015	0.360649	0.382684	0.0310062
Q15743	Q15743	GPR68	Ovarian cancer G-protein coupled receptor 1	0.278439	-	0.435417	0.197991	0.253019	0.22733	0.0432773
Q9NPY3	Q9NPY3	CD93	Complement component C1q receptor	0.273341	0.256945	0.20048	0.194162	0.272635	0.442481	0.0238721
P07204	P07204	THBD	Thrombomodulin	0.158917	-	0.134869	-	0.173688	0.168194	0.0320445

## Sheet: S4D - CD14+ and Pan- Monocytes
Comparison of proteins modulated at the cell surface by IFNa2a in primary CD14+ monocyte and pan-monocyte populations
Proteins are determined as upregulated in both monocyte populations according to criteria of average fold change > 1 SD from mean and FC > 1 in all donors.
Proteins are determined as downregulated in both monocyte populations according to criteria of average fold change > 1 SD from mean and FC < 1 in all donors.
Uniprot-L	Uniprot-S	Gene Symbol	Average fold change in CD14+ monocytes	Average fold change in pan-monocytes	Modulated in CD14+ monocytes	Modulated in pan-monocytes
P30874	P30874	SSTR2	7.61858	8.40808	Upregulated	Upregulated
Q07108	Q07108	CD69	4.28656	3.94213	Upregulated	Upregulated
Q9NQ25	Q9NQ25	SLAMF7	4.06001	2.63706	Upregulated	Upregulated
P28907	P28907	CD38	3.87849	2.41233	Upregulated	Upregulated
Q10589	Q10589	BST2	3.6372	2.43756	Upregulated	Upregulated
P05161	P05161	ISG15	3.29767	2.51977	Upregulated	Upregulated
P25942	P25942	CD40	2.55388	1.50161	Upregulated	Upregulated
Q9H3S1	Q9H3S1	SEMA4A	2.52645	1.89459	Upregulated	Upregulated
Q8NHJ6-2	Q8NHJ6	LILRB4	2.42959	1.6422	Upregulated	Upregulated
Q13291-4	Q13291	SLAMF1	2.40509	2.26579	Upregulated	Upregulated
P01589	P01589	IL2RA	2.40282	3.09435	Upregulated	Upregulated
Q01151	Q01151	CD83	2.29219	1.94879	Upregulated	Upregulated
Q8NHJ6-3	Q8NHJ6	LILRB4	2.23099	1.76794	Upregulated	Upregulated
Q9NZQ7	Q9NZQ7	CD274	2.21213	2.46038	Upregulated	Upregulated
		HLA-A	2.10415	1.75778	Upregulated	Upregulated
		HLA-B	2.07494	1.56858	Upregulated	Upregulated
P32248	P32248	CCR7	2.0696	1.59093	Upregulated	Upregulated
Q8N131	Q8N131	TMEM123	2.05382	1.79053	Upregulated	Upregulated
P30511-3	P30511	HLA-F	2.01614	1.71228	Upregulated	Upregulated
		HLA-DRB1	1.92259	1.70585	Upregulated	Upregulated
P01903	P01903	HLA-DRA	1.86742	1.81871	Upregulated	Upregulated
Q6PI73	Q6PI73	LILRA6	1.80884	1.44385	Upregulated	Upregulated
P79483	P79483	HLA-DRB3	1.78592	1.49738	Upregulated	Upregulated
		HLA-C	1.67572	1.71825	Upregulated	Upregulated
Q13873	Q13873	BMPR2	1.63501	2.07499	Upregulated	Upregulated
Q9NQS5	Q9NQS5	GPR84	1.63071	1.67865	Upregulated	Upregulated
P42081	P42081	CD86	1.5565	1.82278	Upregulated	Upregulated
P04440	P04440	HLA-DPB1	1.55554	1.52028	Upregulated	Upregulated
P04839	P04839	CYBB	1.5312	1.60199	Upregulated	Upregulated
P17066	P17066	HSPA6	2.14227	0.723543	Upregulated	No change
P13747	P13747	HLA-E	1.82414	1.34308	Upregulated	No change
Q9C0K1	Q9C0K1	SLC39A8	1.75995	1.24665	Upregulated	No change
P51681	P51681	CCR5	1.69981	1.25726	Upregulated	No change
Q6E0U4	Q6E0U4	DMKN	1.65311	0.915662	Upregulated	No change
P25445	P25445	FAS	1.57556	1.22565	Upregulated	No change
Q8N423	Q8N423	LILRB2	1.52231	1.36316	Upregulated	No change
Q8N370-3	Q8N370	SLC43A2	0.599464	0.650644	Downregulated	Downregulated
Q9UPY5	Q9UPY5	SLC7A11	0.595011	0.624771	Downregulated	Downregulated
P02656	P02656	APOC3	0.576453	0.599062	Downregulated	Downregulated
P08581-2	P08581	MET	0.57086	0.551588	Downregulated	Downregulated
P32249	P32249	GPR183	0.518655	0.608909	Downregulated	Downregulated
P07333	P07333	CSF1R	0.442961	0.515749	Downregulated	Downregulated
P13611	P13611	VCAN	0.40799	0.406417	Downregulated	Downregulated
Q07954	Q07954	LRP1	0.396063	0.602045	Downregulated	Downregulated
P10721	P10721	KIT	0.392364	0.528029	Downregulated	Downregulated
O95477	O95477	ABCA1	0.37697	0.346575	Downregulated	Downregulated
O14786	O14786	NRP1	0.35049	0.519191	Downregulated	Downregulated
Q9H5V8	Q9H5V8	CDCP1	0.290979	0.35585	Downregulated	Downregulated
Q9NY25	Q9NY25	CLEC5A	0.287513	0.376126	Downregulated	Downregulated
Q9NPY3	Q9NPY3	CD93	0.273341	0.440141	Downregulated	Downregulated
P07204	P07204	THBD	0.158917	0.336925	Downregulated	Downregulated
Q92896-2	Q92896	GLG1	0.731491	0.712146	Downregulated	No change
P23469	P23469	PTPRE	0.726756	0.956032	Downregulated	No change
P58335	P58335	ANTXR2	0.72627	0.93542	Downregulated	No change
P13224-2	P13224	GP1BB	0.706466	0.782287	Downregulated	No change
P15144	P15144	ANPEP	0.6959	0.910516	Downregulated	No change
P17181	P17181	IFNAR1	0.682568	0.956387	Downregulated	No change
P06213	P06213	INSR	0.680302	0.744972	Downregulated	No change
Q9NPR2	Q9NPR2	SEMA4B	0.676237	0.733472	Downregulated	No change
Q9H7F0	Q9H7F0	ATP13A3	0.674083	0.800073	Downregulated	No change
P11169	P11169	SLC2A3	0.672428	1.0334	Downregulated	No change
P05556	P05556	ITGB1	0.672297	0.878891	Downregulated	No change
P48029	P48029	SLC6A8	0.669811	0.98456	Downregulated	No change
P46531	P46531	NOTCH1	0.667816	0.71623	Downregulated	No change
Q9Y6M7-13	Q9Y6M7	SLC4A7	0.656322	0.762375	Downregulated	No change
P12318	P12318	FCGR2A	0.650675	0.93142	Downregulated	No change
P13987	P13987	CD59	0.639261	0.867412	Downregulated	No change
P24071	P24071	FCAR	0.631989	0.724334	Downregulated	No change
Q03405	Q03405	PLAUR	0.621678	0.879808	Downregulated	No change
P25090	P25090	FPR2	0.619617	0.74483	Downregulated	No change
P48060	P48060	GLIPR1	0.60259	0.716174	Downregulated	No change
P08571	P08571	CD14	0.555986	0.836187	Downregulated	No change
Q9NPH3	Q9NPH3	IL1RAP	0.538453	0.840152	Downregulated	No change
Q7Z7N9	Q7Z7N9	TMEM179B	0.533759	1.2491	Downregulated	No change
Q9HC73	Q9HC73	CRLF2	0.523128	0.741808	Downregulated	No change
P21730	P21730	C5AR1	0.515733	0.679676	Downregulated	No change
Q496F6	Q496F6	CD300E	0.498286	0.85683	Downregulated	No change
P08637	P08637	FCGR3A	0.455615	0.936661	Downregulated	No change
P11166	P11166	SLC2A1	0.418448	0.740348	Downregulated	No change
P31994	P31994	FCGR2B	0.320379	0.670482	Downregulated	No change
P29323	P29323	EPHB2	2.4097	2.28717	No change	Upregulated
Q8TCT8	Q8TCT8	SPPL2A	1.4612	1.80725	No change	Upregulated
Q30154	Q30154	HLA-DRB5	1.40518	1.5725	No change	Upregulated
Q92692	Q92692	NECTIN2	1.40251	1.58333	No change	Upregulated
P10809	P10809	HSPD1	1.35331	1.77976	No change	Upregulated
P60174	P60174	TPI1	1.32813	1.7779	No change	Upregulated
P43119	P43119	PTGIR	1.32271	1.60672	No change	Upregulated
Q14114	Q14114	LRP8	1.2074	1.96163	No change	Upregulated
P01130	P01130	LDLR	1.1517	1.48685	No change	Upregulated
Q99571-2	Q99571	P2RX4	1.1141	2.25575	No change	Upregulated
P13473-2	P13473	LAMP2	1.04615	2.10763	No change	Upregulated
Q9NRA2	Q9NRA2	SLC17A5	1.00625	1.88745	No change	Upregulated
P08962	P08962	CD63	0.969669	1.51995	No change	Upregulated
P11279	P11279	LAMP1	0.930839	2.0005	No change	Upregulated
P01854	P01854	IGHE	0.907115	1.43233	No change	Upregulated
P49279	P49279	SLC11A1	0.875274	2.29112	No change	Upregulated
P62805	P62805	HIST1H4A	0.659955	1.99643	No change	Upregulated
P09211	P09211	GSTP1	1.51451	0.637897	No change	Downregulated
P07900-2	P07900	HSP90AA1	1.49094	0.632824	No change	Downregulated
P12814-4	P12814	ACTN1	1.35203	0.410589	No change	Downregulated
P04075-2	P04075	ALDOA	1.3441	0.595442	No change	Downregulated
P07996	P07996	THBS1	1.32021	0.559849	No change	Downregulated
P31146	P31146	CORO1A	1.26228	0.65156	No change	Downregulated
P04275	P04275	VWF	1.20925	0.625406	No change	Downregulated
P07359	P07359	GP1BA	1.18087	0.518475	No change	Downregulated
Q5VTE0	Q5VTE0	EEF1A1P5	1.1803	0.654712	No change	Downregulated
P13010	P13010	XRCC5	1.1554	0.603143	No change	Downregulated
P06733	P06733	ENO1	1.14521	0.633902	No change	Downregulated
Q01518	Q01518	CAP1	1.12946	0.538118	No change	Downregulated
P06576	P06576	ATP5B	1.12397	0.469052	No change	Downregulated
O43707	O43707	ACTN4	1.11693	0.505351	No change	Downregulated
O75083	O75083	WDR1	1.10603	0.593884	No change	Downregulated
Q8TCT7	Q8TCT7	SPPL2B	1.0981	0.386372	No change	Downregulated
P06703	P06703	S100A6	1.07694	0.366345	No change	Downregulated
P63104	P63104	YWHAZ	1.03002	0.619339	No change	Downregulated
P08758	P08758	ANXA5	1.02816	0.487662	No change	Downregulated
Q96AP7	Q96AP7	ESAM	0.967753	0.590858	No change	Downregulated
Q13201	Q13201	MMRN1	0.966338	0.500474	No change	Downregulated
Q00839	Q00839	HNRNPU	0.912287	0.647028	No change	Downregulated
P43490	P43490	NAMPT	0.805332	0.570874	No change	Downregulated
P17927	P17927	CR1	0.772919	0.649545	No change	Downregulated
O95274	O95274	LYPD3	0.667469	0.261903	No change	Downregulated
P11142	P11142	HSPA8	1.95576	0.79957	No change	No change
P08069	P08069	IGF1R	1.78213	0.847793	No change	No change
P68871	P68871	HBB	1.61558	1.63547	No change	No change
Q14246	Q14246	ADGRE1	1.50295	1.2711	No change	No change
Q8WXI8	Q8WXI8	CLEC4D	1.46198	0.810484	No change	No change
P14384	P14384	CPM	1.45905	0.974078	No change	No change
P35241-5	P35241	RDX	1.44951	0.672637	No change	No change
Q92854	Q92854	SEMA4D	1.44592	0.935243	No change	No change
A8MVS5	A8MVS5	HIDE1	1.43042	1.25061	No change	No change
P19338	P19338	NCL	1.40914	1.0202	No change	No change
Q9UIG8	Q9UIG8	SLCO3A1	1.40856	1.16704	No change	No change
O75022-2	O75022	LILRB3	1.40323	1.02562	No change	No change
Q99572	Q99572	P2RX7	1.39588	1.05366	No change	No change
Q9UKJ1	Q9UKJ1	PILRA	1.36775	1.21437	No change	No change
Q99497	Q99497	PARK7	1.36399	0.836715	No change	No change
Q06830	Q06830	PRDX1	1.36234	0.936043	No change	No change
P04233-2	P04233	CD74	1.3606	1.11195	No change	No change
Q86VB7-2	Q86VB7	CD163	1.3595	1.26751	No change	No change
P08238	P08238	HSP90AB1	1.35443	0.660824	No change	No change
P15151	P15151	PVR	1.34942	1.04331	No change	No change
Q8TD46-4	Q8TD46	CD200R1	1.34595	1.2403	No change	No change
Q08ET2	Q08ET2	SIGLEC14	1.32595	1.0497	No change	No change
O94804	O94804	STK10	1.32528	0.922011	No change	No change
Q04721	Q04721	NOTCH2	1.31105	1.02545	No change	No change
Q13162	Q13162	PRDX4	1.30752	0.963046	No change	No change
P00488	P00488	F13A1	1.30554	0.900794	No change	No change
O60462	O60462	NRP2	1.30356	0.746338	No change	No change
P28906	P28906	CD34	1.30096	0.733144	No change	No change
Q92956	Q92956	TNFRSF14	1.29664	0.807106	No change	No change
P78324	P78324	SIRPA	1.29427	1.05653	No change	No change
P26012	P26012	ITGB8	1.28688	0.951039	No change	No change
P01920	P01920	HLA-DQB1	1.28615	1.02245	No change	No change
P15813	P15813	CD1D	1.28071	1.07281	No change	No change
P62993	P62993	GRB2	1.27938	0.816489	No change	No change
B0I1T2	B0I1T2	MYO1G	1.2783	1.00313	No change	No change
P63010-2	P63010	AP2B1	1.2753	0.77803	No change	No change
Q5QGZ9-1	Q5QGZ9	CLEC12A	1.27514	0.967441	No change	No change
Q9H7M9	Q9H7M9	C10orf54	1.27472	1.03439	No change	No change
P23528	P23528	CFL1	1.27368	0.795636	No change	No change
P07948-2	P07948	LYN	1.27353	1.13119	No change	No change
P05362	P05362	ICAM1	1.27195	1.20724	No change	No change
Q96LC7	Q96LC7	SIGLEC10	1.27194	1.16413	No change	No change
Q01650	Q01650	SLC7A5	1.2695	0.845649	No change	No change
P23458	P23458	JAK1	1.26793	0.695066	No change	No change
O15389	O15389	SIGLEC5	1.25967	1.26498	No change	No change
P27797	P27797	CALR	1.25721	0.693042	No change	No change
Q8IYS5-3	Q8IYS5	OSCAR	1.25698	0.839342	No change	No change
Q5T3F8	Q5T3F8	TMEM63B	1.25616	1.12508	No change	No change
Q14344	Q14344	GNA13	1.25156	0.933059	No change	No change
P09104	P09104	ENO2	1.25116	0.6825	No change	No change
O43315	O43315	AQP9	1.24108	1.3555	No change	No change
P78325	P78325	ADAM8	1.23951	1.35658	No change	No change
Q92542	Q92542	NCSTN	1.23676	1.10447	No change	No change
P61626	P61626	LYZ	1.23328	1.09672	No change	No change
Q9NZM1	Q9NZM1	MYOF	1.22648	1.32297	No change	No change
P04406	P04406	GAPDH	1.22293	0.731288	No change	No change
Q13740-2	Q13740	ALCAM	1.22187	1.04082	No change	No change
Q8NHL6-3	Q8NHL6	LILRB1	1.21553	1.2468	No change	No change
Q9BZQ8	Q9BZQ8	FAM129A	1.21544	1.11948	No change	No change
O95976	O95976	IGSF6	1.21423	1.08525	No change	No change
P46940	P46940	IQGAP1	1.21359	1.02897	No change	No change
P02765	P02765	AHSG	1.2108	0.920738	No change	No change
Q15149	Q15149	PLEC	1.20826	1.07204	No change	No change
P0C0L5	P0C0L5	C4B	1.19815	0.981883	No change	No change
P04792	P04792	HSPB1	1.19639	1.21322	No change	No change
Q9Y4D7	Q9Y4D7	PLXND1	1.19567	1.16434	No change	No change
P35579	P35579	MYH9	1.19262	0.856434	No change	No change
Q09666	Q09666	AHNAK	1.19246	0.908131	No change	No change
Q12913	Q12913	PTPRJ	1.18956	1.05903	No change	No change
O75871	O75871	CEACAM4	1.18757	1.03135	No change	No change
P13639	P13639	EEF2	1.18532	0.658855	No change	No change
P15509-7	P15509	CSF2RA	1.17901	1.00505	No change	No change
P62937	P62937	PPIA	1.17843	1.04667	No change	No change
P84095	P84095	RHOG	1.17828	1.16699	No change	No change
P07237	P07237	P4HB	1.17748	0.752262	No change	No change
O15018	O15018	PDZD2	1.17654	1.28843	No change	No change
P14618	P14618	PKM	1.17298	0.776608	No change	No change
P15529-2	P15529	CD46	1.17125	1.09178	No change	No change
Q6GTX8	Q6GTX8	LAIR1	1.17009	1.01117	No change	No change
Q08722	Q08722	CD47	1.16592	1.31875	No change	No change
P05026	P05026	ATP1B1	1.16575	1.05455	No change	No change
P01857	P01857	IGHG1	1.16472	0.686452	No change	No change
Q14699	Q14699	RFTN1	1.16394	0.94817	No change	No change
P12314	P12314	FCGR1A	1.16036	1.06232	No change	No change
P02786	P02786	TFRC	1.15981	1.28495	No change	No change
P51575	P51575	P2RX1	1.15819	1.00813	No change	No change
Q14242-2	Q14242	SELPLG	1.15757	0.983774	No change	No change
P68431	P68431	HIST1H3A	1.15753	1.1707	No change	No change
P63000-2	P63000	RAC1	1.15347	1.17224	No change	No change
P78324-2	P78324	SIRPA	1.15288	1.06523	No change	No change
Q92508	Q92508	PIEZO1	1.15277	0.962423	No change	No change
Q8N149	Q8N149	LILRA2	1.15026	0.896872	No change	No change
P48960	P48960	CD97	1.14838	1.23597	No change	No change
P31949	P31949	S100A11	1.14698	1.03565	No change	No change
P60709	P60709	ACTB	1.14327	0.749899	No change	No change
Q969Z4	Q969Z4	RELT	1.14326	1.00057	No change	No change
Q9NRM0	Q9NRM0	SLC2A9	1.14242	1.0049	No change	No change
P51511	P51511	MMP15	1.13819	1.25245	No change	No change
P01042-2	P01042	KNG1	1.13621	1.03696	No change	No change
P26038	P26038	MSN	1.13488	0.702922	No change	No change
P07355-2	P07355	ANXA2	1.13196	1.14346	No change	No change
P23396-2	P23396	RPS3	1.13182	0.878397	No change	No change
O00478	O00478	BTN3A3	1.13057	1.14394	No change	No change
Q15833	Q15833	STXBP2	1.12975	0.966612	No change	No change
P08174-7	P08174	CD55	1.12872	0.930735	No change	No change
Q15286	Q15286	RAB35	1.12861	0.971914	No change	No change
P68371	P68371	TUBB4B	1.12808	0.716749	No change	No change
P34910-2	P34910	EVI2B	1.12545	1.22634	No change	No change
P16615	P16615	ATP2A2	1.12479	0.792782	No change	No change
P33527	P33527	ABCC1	1.12158	0.976012	No change	No change
P15153	P15153	RAC2	1.11993	1.29001	No change	No change
Q92536	Q92536	SLC7A6	1.11837	1.14281	No change	No change
Q6P4Q7	Q6P4Q7	CNNM4	1.1174	1.05673	No change	No change
P31641	P31641	SLC6A6	1.11607	1.36726	No change	No change
P19256	P19256	CD58	1.11352	1.02234	No change	No change
P15529	P15529	CD46	1.11162	0.988517	No change	No change
Q9NY35	Q9NY35	CLDND1	1.11146	1.2513	No change	No change
Q14315	Q14315	FLNC	1.11047	0.753335	No change	No change
Q96DU3	Q96DU3	SLAMF6	1.11022	0.996526	No change	No change
P09326	P09326	CD48	1.10892	1.1969	No change	No change
P43652	P43652	AFM	1.10835	1.17985	No change	No change
Q9H813-2	Q9H813	TMEM206	1.10747	1.21355	No change	No change
O60486	O60486	PLXNC1	1.10663	0.978312	No change	No change
P05141	P05141	SLC25A5	1.10303	0.880757	No change	No change
P49961-6	P49961	ENTPD1	1.10277	1.08028	No change	No change
O75131	O75131	CPNE3	1.10141	0.90885	No change	No change
A6NIZ1	A6NIZ1	RP1BL	1.09864	1.00547	No change	No change
P08670	P08670	VIM	1.09658	0.961814	No change	No change
P09769	P09769	FGR	1.09503	1.0645	No change	No change
Q9Y5S1	Q9Y5S1	TRPV2	1.09312	1.01897	No change	No change
P14625	P14625	HSP90B1	1.09046	0.755653	No change	No change
P12259	P12259	F5	1.08964	0.838695	No change	No change
P26951	P26951	IL3RA	1.08877	1.10933	No change	No change
P0CG48	P0CG48	UBC	1.08507	1.00082	No change	No change
O00206	O00206	TLR4	1.08467	1.11545	No change	No change
Q9NV96	Q9NV96	TMEM30A	1.08202	1.04617	No change	No change
P51828	P51828	ADCY7	1.07925	1.00488	No change	No change
P43003	P43003	SLC1A3	1.07873	1.13274	No change	No change
P08575	P08575	PTPRC	1.07821	1.03503	No change	No change
O00161	O00161	SNAP23	1.07669	1.06801	No change	No change
P08754	P08754	GNAI3	1.0745	1.11616	No change	No change
P23141-2	P23141	CES1	1.07346	0.869358	No change	No change
P05155-3	P05155	SERPING1	1.07338	1.30586	No change	No change
P04921	P04921	GYPC	1.07095	0.748949	No change	No change
P0CG05	P0CG05	IGLC2	1.07074	0.794338	No change	No change
P31947	P31947	SFN	1.07018	0.684487	No change	No change
O95466-3	O95466	FMNL1	1.06781	0.931436	No change	No change
O00241	O00241	SIRPB1	1.06604	0.810501	No change	No change
Q00610	Q00610	CLTC	1.0644	0.804383	No change	No change
P09382	P09382	LGALS1	1.06197	1.01484	No change	No change
Q6PCB8	Q6PCB8	EMB	1.06154	1.00687	No change	No change
P14209	P14209	CD99	1.06091	1.00596	No change	No change
O60449-2	O60449	LY75	1.05985	0.894377	No change	No change
P01860	P01860	IGHG3	1.05882	0.9044	No change	No change
P68032	P68032	ACTC1	1.05615	0.724103	No change	No change
P62879	P62879	GNB2	1.055	0.939547	No change	No change
P61106	P61106	RAB14	1.05427	1.05795	No change	No change
Q9UIQ6	Q9UIQ6	LNPEP	1.05133	1.1116	No change	No change
P41231	P41231	P2RY2	1.04842	0.973354	No change	No change
P32418	P32418	SLC8A1	1.04839	0.862471	No change	No change
P33241-3	P33241	LSP1	1.04331	0.85381	No change	No change
Q8NG11	Q8NG11	TSPAN14	1.04011	0.975759	No change	No change
Q687X5	Q687X5	STEAP4	1.03882	0.982933	No change	No change
P20138	P20138	CD33	1.03757	0.995188	No change	No change
P13796	P13796	LCP1	1.03715	0.723144	No change	No change
Q04941	Q04941	PLP2	1.03715	1.05639	No change	No change
Q9UIW2	Q9UIW2	PLXNA1	1.03704	0.960203	No change	No change
P19440	P19440	GGT1	1.03142	1.06562	No change	No change
P20701-2	P20701	ITGAL	1.02927	0.969721	No change	No change
O15438-4	O15438	ABCC3	1.02725	0.983174	No change	No change
P11021	P11021	HSPA5	1.02713	0.824842	No change	No change
P51148-2	P51148	RAB5C	1.02699	1.07845	No change	No change
P21462	P21462	FPR1	1.02504	1.0646	No change	No change
P00738	P00738	HP	1.02398	1.13436	No change	No change
O00299	O00299	CLIC1	1.02379	0.840039	No change	No change
P02790	P02790	HPX	1.02221	0.9422	No change	No change
P02750	P02750	LRG1	1.0218	1.04195	No change	No change
P08195-4	P08195	SLC3A2	1.02088	1.02926	No change	No change
P30101	P30101	PDIA3	1.02069	0.728696	No change	No change
P02760	P02760	AMBP	1.0189	0.968792	No change	No change
P78380	P78380	OLR1	1.01706	1.25627	No change	No change
Q9Y490	Q9Y490	TLN1	1.01363	0.902773	No change	No change
P05771-2	P05771	PRKCB	1.01297	1.02671	No change	No change
Q9Y666	Q9Y666	SLC12A7	1.0118	1.01238	No change	No change
Q92930	Q92930	RAB8B	1.01175	0.980462	No change	No change
Q14118	Q14118	DAG1	1.01055	0.756281	No change	No change
P42892	P42892	ECE1	1.01021	0.87771	No change	No change
P12931-2	P12931	SRC	1.01002	1.21183	No change	No change
O15439	O15439	ABCC4	1.00987	0.945329	No change	No change
Q9UIB8-3	Q9UIB8	CD84	1.00513	0.913486	No change	No change
P32942	P32942	ICAM3	1.00405	1.16509	No change	No change
P60903	P60903	S100A10	1.00314	1.08306	No change	No change
Q00325	Q00325	SLC25A3	1.00232	0.9294	No change	No change
P11215-2	P11215	ITGAM	1.00206	1.24085	No change	No change
Q9Y6M5	Q9Y6M5	SLC30A1	0.998376	0.941746	No change	No change
O00186	O00186	STXBP3	0.996873	0.961243	No change	No change
P23634	P23634	ATP2B4	0.995504	0.857108	No change	No change
Q9NY15	Q9NY15	STAB1	0.995284	0.786218	No change	No change
O60602	O60602	TLR5	0.992833	0.893872	No change	No change
P13612	P13612	ITGA4	0.992112	1.0077	No change	No change
P25025	P25025	CXCR2	0.990692	1.12004	No change	No change
Q8IU68	Q8IU68	TMC8	0.989572	1.05015	No change	No change
P21333	P21333	FLNA	0.988784	0.76404	No change	No change
P13598	P13598	ICAM2	0.985254	1.02819	No change	No change
P08631	P08631	HCK	0.983012	1.01877	No change	No change
Q8TDQ1-6	Q8TDQ1	CD300LF	0.982326	1.04249	No change	No change
P05023-4	P05023	ATP1A1	0.981229	0.845645	No change	No change
Q10588	Q10588	BST1	0.980926	1.33757	No change	No change
Q7Z6M3	Q7Z6M3	MILR1	0.98052	1.06979	No change	No change
Q14162	Q14162	SCARF1	0.980131	1.17925	No change	No change
Q9NX76	Q9NX76	CMTM6	0.979976	0.790371	No change	No change
P11362-21	P11362	FGFR1	0.978077	0.651425	No change	No change
P05090	P05090	APOD	0.977567	0.8718	No change	No change
Q12907	Q12907	LMAN2	0.9773	0.704493	No change	No change
P02787	P02787	TF	0.976504	0.893472	No change	No change
Q9Y624	Q9Y624	F11R	0.976465	0.986482	No change	No change
P25105	P25105	PTAFR	0.975218	0.814133	No change	No change
P01009	P01009	SERPINA1	0.974714	0.903845	No change	No change
O14944	O14944	EREG	0.974492	0.778891	No change	No change
Q9UP95	Q9UP95	SLC12A4	0.973642	1.06029	No change	No change
Q9Y2C9	Q9Y2C9	TLR6	0.973485	0.825698	No change	No change
Q96BD0	Q96BD0	SLCO4A1	0.97342	1.12769	No change	No change
Q13444	Q13444	ADAM15	0.972224	0.975224	No change	No change
P01859	P01859	IGHG2	0.97138	0.582531	No change	No change
Q9H0X4	Q9H0X4	FAM234A	0.96913	0.697388	No change	No change
P20645	P20645	M6PR	0.964567	0.905791	No change	No change
P10909-2	P10909	CLU	0.962669	0.80201	No change	No change
P20020	P20020	ATP2B1	0.962585	0.699953	No change	No change
P04899	P04899	GNAI2	0.956337	0.801699	No change	No change
P18084	P18084	ITGB5	0.956262	1.28863	No change	No change
P16150	P16150	SPN	0.955211	0.938378	No change	No change
P05164-3	P05164	MPO	0.954431	1.09358	No change	No change
Q15722	Q15722	LTB4R	0.954358	0.894931	No change	No change
P20073	P20073	ANXA7	0.953857	0.839263	No change	No change
Q7KYR7	Q7KYR7	BTN2A1	0.951582	0.885569	No change	No change
P98196	P98196	ATP11A	0.950499	0.886622	No change	No change
Q93033	Q93033	CD101	0.949802	0.966819	No change	No change
P16671	P16671	CD36	0.949025	0.897535	No change	No change
Q9UM01	Q9UM01	SLC7A7	0.948788	1.01569	No change	No change
P51153	P51153	RAB13	0.946534	1.04253	No change	No change
Q9ULQ1-3	Q9ULQ1	TPCN1	0.944311	1.07463	No change	No change
Q4KMQ2-2	Q4KMQ2	ANO6	0.944141	1.17295	No change	No change
Q9Y286	Q9Y286	SIGLEC7	0.943839	0.997394	No change	No change
O95977	O95977	S1PR4	0.943604	0.817774	No change	No change
P02749	P02749	APOH	0.94043	0.969434	No change	No change
P18433	P18433	PTPRA	0.940425	1.02517	No change	No change
P04920	P04920	SLC4A2	0.93886	0.916359	No change	No change
P08887	P08887	IL6R	0.935965	1.01612	No change	No change
Q6UWL2-2	Q6UWL2	SUSD1	0.935925	0.788757	No change	No change
P29466	P29466	CASP1	0.934449	0.937866	No change	No change
P50281	P50281	MMP14	0.933536	1.23162	No change	No change
P48509	P48509	CD151	0.923782	1.01876	No change	No change
P05107	P05107	ITGB2	0.921261	1.14726	No change	No change
Q8IX19	Q8IX19	MCEMP1	0.918183	0.910656	No change	No change
P56199	P56199	ITGA1	0.917164	0.913359	No change	No change
Q96D31	Q96D31	ORAI1	0.915133	1.18434	No change	No change
P30273	P30273	FCER1G	0.914018	0.857205	No change	No change
O14672	O14672	ADAM10	0.912769	0.912884	No change	No change
P30679	P30679	GNA15	0.908728	0.892843	No change	No change
O15031	O15031	PLXNB2	0.908102	0.996038	No change	No change
P26447	P26447	S100A4	0.906111	0.802931	No change	No change
P49019	P49019	HCAR3	0.90409	0.750544	No change	No change
Q9BXX0	Q9BXX0	EMILIN2	0.902261	1.17925	No change	No change
P04083	P04083	ANXA1	0.900746	0.966351	No change	No change
Q9BX67	Q9BX67	JAM3	0.898425	0.765476	No change	No change
Q6PJF5	Q6PJF5	RHBDF2	0.898168	0.925361	No change	No change
P78536	P78536	ADAM17	0.897674	1.03048	No change	No change
P54709	P54709	ATP1B3	0.897342	0.931643	No change	No change
P60953	P60953	CDC42	0.891938	1.18386	No change	No change
P20702	P20702	ITGAX	0.891913	1.24644	No change	No change
Q9Y639	Q9Y639	NPTN	0.888775	0.874092	No change	No change
P40197	P40197	GP5	0.887427	0.855829	No change	No change
Q8NBI5-2	Q8NBI5	SLC43A3	0.88626	1.05456	No change	No change
P35613	P35613	BSG	0.886248	0.859677	No change	No change
P26572	P26572	MGAT1	0.885774	0.949472	No change	No change
P09543	P09543	CNP	0.884865	1.2429	No change	No change
Q8NE01	Q8NE01	CNNM3	0.882517	0.893234	No change	No change
P02652	P02652	APOA2	0.881625	0.845069	No change	No change
P04217	P04217	A1BG	0.877655	0.935541	No change	No change
P06756	P06756	ITGAV	0.876221	0.785898	No change	No change
Q658P3-2	Q658P3	STEAP3	0.875265	0.979456	No change	No change
Q9Y3Z3	Q9Y3Z3	SAMHD1	0.874811	0.806474	No change	No change
Q9Y336	Q9Y336	SIGLEC9	0.873257	0.952515	No change	No change
Q96TA1	Q96TA1	FAM129B	0.869239	0.984335	No change	No change
P16109	P16109	SELP	0.863592	0.674345	No change	No change
Q9UMR7	Q9UMR7	CLEC4A	0.861865	1.03036	No change	No change
Q12999	Q12999	TSPAN31	0.860539	1.32697	No change	No change
P16284	P16284	PECAM1	0.859896	0.906943	No change	No change
P02675	P02675	FGB	0.858752	0.754059	No change	No change
Q9H015	Q9H015	SLC22A4	0.852409	2.95636	No change	No change
Q9UGN4	Q9UGN4	CD300A	0.845866	1.10912	No change	No change
O60603	O60603	TLR2	0.836567	0.966844	No change	No change
P23229	P23229	ITGA6	0.836009	0.91056	No change	No change
P17301	P17301	ITGA2	0.835596	0.909616	No change	No change
O95497	O95497	VNN1	0.835158	0.84084	No change	No change
Q13443	Q13443	ADAM9	0.830431	0.964547	No change	No change
P02679	P02679	FGG	0.830366	0.678989	No change	No change
Q8WWI5	Q8WWI5	SLC44A1	0.826778	0.91271	No change	No change
P05106	P05106	ITGB3	0.825517	0.907635	No change	No change
Q5JXA9	Q5JXA9	SIRPB2	0.824458	0.884007	No change	No change
Q9BZW8	Q9BZW8	CD244	0.823918	0.774236	No change	No change
Q15762	Q15762	CD226	0.819972	0.849708	No change	No change
P19397	P19397	CD53	0.816129	0.926318	No change	No change
Q15758	Q15758	SLC1A5	0.805935	0.925216	No change	No change
P31785	P31785	IL2RG	0.802729	0.875656	No change	No change
O00421-2	O00421	CCRL2	0.802683	1.11443	No change	No change
P08514	P08514	ITGA2B	0.801867	0.962261	No change	No change
Q9C0H2-4	Q9C0H2	TTYH3	0.799145	0.933996	No change	No change
P08567	P08567	PLEK	0.798763	0.799188	No change	No change
Q9HCN6-3	Q9HCN6	GP6	0.794483	1.29416	No change	No change
O75882	O75882	ATRN	0.790084	0.79598	No change	No change
Q8IWA5-3	Q8IWA5	SLC44A2	0.783647	0.968984	No change	No change
O95866	O95866	G6B	0.782677	0.658382	No change	No change
Q9BS26	Q9BS26	ERP44	0.780992	1.05724	No change	No change
P13591	P13591	NCAM1	0.779842	0.903962	No change	No change
P16070	P16070	CD44	0.77957	0.984684	No change	No change
Q9UHX3	Q9UHX3	ADGRE2	0.779543	1.14824	No change	No change
Q8N386	Q8N386	LRRC25	0.779402	1.11978	No change	No change
P61073-2	P61073	CXCR4	0.757782	0.773578	No change	No change
P08648	P08648	ITGA5	0.756269	0.947078	No change	No change
P11717	P11717	IGF2R	0.75332	0.994276	No change	No change
Q9UHW9	Q9UHW9	SLC12A6	0.749481	0.870017	No change	No change
P20333	P20333	TNFRSF1B	0.748202	0.808244	No change	No change
Q08708	Q08708	CD300C	0.743205	0.91034	No change	No change
P04156	P04156	PRNP	0.742683	0.914576	No change	No change
P27701	P27701	CD82	0.740405	0.884829	No change	No change
Q96F46	Q96F46	IL17RA	0.738051	0.839952	No change	No change
Q9NP99	Q9NP99	TREM1	0.730502	0.947028	No change	No change
O75144-2	O75144	ICOSLG	0.711255	1.04723	No change	No change
P06127	P06127	CD5	0.705336	0.831783	No change	No change
P17813	P17813	ENG	0.703567	0.720987	No change	No change
P15260	P15260	IFNGR1	0.70235	0.900323	No change	No change
Q9H3T3	Q9H3T3	SEMA6B	0.647177	0.771881	No change	No change

## Sheet: S4E - CD14+ Monocytes and THP1
Comparison of proteins modulated at the cell surface by IFNa2a in primary CD14+ monocytes and cultured THP-1s
Proteins are determined as upregulated in primary CD14+ monocytes according to criteria of average fold change > 1 SD from mean and FC > 1 in all donors.
Proteins are determined as downregulated in primary CD14+ monocytes according to criteria of average fold change > 1 SD from mean and FC < 1 in all donors.
Proteins are determined as upregulated in cultured THP-1s according to criteria of fold change > 1 SD from mean
Proteins are determined as downregulated in cultured THP-1s according to criteria of fold change > 1 SD from mean
Uniprot-L	Uniprot-S	Gene Symbol	Average fold change in CD14+ Monocytes	Fold Change in THP-1	Modulated in CD14+ monocytes	Modulated in THP-1s
Q10589	Q10589	BST2	3.6372	2.37701	Upregulated	Upregulated
P13762	P13762	HLA-DRB4	2.44819	2.07367	Upregulated	Upregulated
Q9BZZ2	Q9BZZ2	SIGLEC1	2.40751	4.21694	Upregulated	Upregulated
P01589	P01589	IL2RA	2.40282	2.91415	Upregulated	Upregulated
Q9NZQ7	Q9NZQ7	CD274	2.21213	2.69813	Upregulated	Upregulated
		HLA-A	2.10415	1.57903	Upregulated	Upregulated
Q8N131	Q8N131	TMEM123	2.05382	1.86587	Upregulated	Upregulated
P01903	P01903	HLA-DRA	1.86742	1.59151	Upregulated	Upregulated
P13747	P13747	HLA-E	1.82414	1.83528	Upregulated	Upregulated
P79483	P79483	HLA-DRB3	1.78592	1.53609	Upregulated	Upregulated
P25445	P25445	FAS	1.57556	1.51954	Upregulated	Upregulated
		HLA-B	2.07494	1.40369	Upregulated	Upregulated
P30511-3	P30511	HLA-F	2.01614	1.40941	Upregulated	Upregulated
		HLA-C	1.67572	1.36061	Upregulated	Upregulated
Q13873	Q13873	BMPR2	1.63501	1.30176	Upregulated	Upregulated
P04839	P04839	CYBB	1.5312	1.28767	Upregulated	Upregulated
Q07108	Q07108	CD69	4.28656	1.1709	Upregulated	No change
P28907	P28907	CD38	3.87849	1.18379	Upregulated	No change
P25942	P25942	CD40	2.55388	1.14451	Upregulated	No change
Q9H3S1	Q9H3S1	SEMA4A	2.52645	1.23276	Upregulated	No change
Q8NHJ6-2	Q8NHJ6	LILRB4	2.42959	1.0877	Upregulated	No change
Q8NHJ6-3	Q8NHJ6	LILRB4	2.23099	1.2567	Upregulated	No change
		HLA-DRB1	1.92259	1.2538	Upregulated	No change
Q9C0K1	Q9C0K1	SLC39A8	1.75995	1.02778	Upregulated	No change
Q9NQS5	Q9NQS5	GPR84	1.63071	0.788607	Upregulated	No change
P42081	P42081	CD86	1.5565	1.2285	Upregulated	No change
P04440	P04440	HLA-DPB1	1.55554	1.21274	Upregulated	No change
Q8N423	Q8N423	LILRB2	1.52231	1.22977	Upregulated	No change
P13987	P13987	CD59	0.639261	1.74348	Downregulated	Upregulated
P08571	P08571	CD14	0.555986	1.42611	Downregulated	Upregulated
P29323	P29323	EPHB2	2.4097	1.91398	No change	Upregulated
O75022-2	O75022	LILRB3	1.40323	1.75474	No change	Upregulated
P28906	P28906	CD34	1.30096	2.27337	No change	Upregulated
P05362	P05362	ICAM1	1.27195	1.77253	No change	Upregulated
P27105	P27105	STOM	1.22523	1.50229	No change	Upregulated
P02786	P02786	TFRC	1.15981	1.50823	No change	Upregulated
P08670	P08670	VIM	1.09658	3.91928	No change	Upregulated
P08962	P08962	CD63	0.969669	2.04728	No change	Upregulated
Q92854	Q92854	SEMA4D	1.44592	1.31629	No change	Upregulated
Q30154	Q30154	HLA-DRB5	1.40518	1.30663	No change	Upregulated
P07948-2	P07948	LYN	1.27353	1.30218	No change	Upregulated
P23458	P23458	JAK1	1.26793	1.40353	No change	Upregulated
P09619	P09619	PDGFRB	1.17017	1.31608	No change	Upregulated
P01130	P01130	LDLR	1.1517	1.30754	No change	Upregulated
P26951	P26951	IL3RA	1.08877	1.28079	No change	Upregulated
P13473-2	P13473	LAMP2	1.04615	1.40389	No change	Upregulated
P11279	P11279	LAMP1	0.930839	1.37472	No change	Upregulated
P17813	P17813	ENG	0.703567	1.27204	No change	Upregulated
P10721	P10721	KIT	0.392364	0.647836	Downregulated	Downregulated
P24071	P24071	FCAR	0.631989	0.734499	Downregulated	Downregulated
Q9C0C4	Q9C0C4	SEMA4C	0.625028	0.755928	Downregulated	Downregulated
Q07954	Q07954	LRP1	0.396063	0.722376	Downregulated	Downregulated
P17181	P17181	IFNAR1	0.682568	0.41117	Downregulated	Downregulated
Q9P2B2	Q9P2B2	PTGFRN	0.677254	0.753056	Downregulated	Downregulated
P12318	P12318	FCGR2A	0.650675	0.899841	Downregulated	No change
Q03405	Q03405	PLAUR	0.621678	1.02732	Downregulated	No change
P98155	P98155	VLDLR	0.614278	0.987294	Downregulated	No change
Q8N370-3	Q8N370	SLC43A2	0.599464	1.13427	Downregulated	No change
Q9UPY5	Q9UPY5	SLC7A11	0.595011	0.895131	Downregulated	No change
P02656	P02656	APOC3	0.576453	0.869876	Downregulated	No change
Q9NPH3	Q9NPH3	IL1RAP	0.538453	1.01889	Downregulated	No change
Q7Z7N9	Q7Z7N9	TMEM179B	0.533759	1.00191	Downregulated	No change
P32249	P32249	GPR183	0.518655	1.04624	Downregulated	No change
P21730	P21730	C5AR1	0.515733	1.07577	Downregulated	No change
O43493	O43493	TGOLN2	0.515529	0.906632	Downregulated	No change
P07333	P07333	CSF1R	0.442961	0.884211	Downregulated	No change
Q6UWB1	Q6UWB1	IL27RA	0.430014	0.934487	Downregulated	No change
P11166	P11166	SLC2A1	0.418448	1.0578	Downregulated	No change
O95477	O95477	ABCA1	0.37697	0.856283	Downregulated	No change
O14786	O14786	NRP1	0.35049	0.953167	Downregulated	No change
P31994	P31994	FCGR2B	0.320379	0.988133	Downregulated	No change
Q9NY25	Q9NY25	CLEC5A	0.287513	0.841883	Downregulated	No change
Q9NPY3	Q9NPY3	CD93	0.273341	1.00159	Downregulated	No change
P07204	P07204	THBD	0.158917	1.12232	Downregulated	No change
Q92896-2	Q92896	GLG1	0.731491	0.880002	Downregulated	No change
P23469	P23469	PTPRE	0.726756	0.857046	Downregulated	No change
P58335	P58335	ANTXR2	0.72627	1.08616	Downregulated	No change
P53794	P53794	SLC5A3	0.709281	0.886776	Downregulated	No change
P15144	P15144	ANPEP	0.6959	1.07142	Downregulated	No change
P06213	P06213	INSR	0.680302	1.02303	Downregulated	No change
Q9NPR2	Q9NPR2	SEMA4B	0.676237	0.79327	Downregulated	No change
Q9H7F0	Q9H7F0	ATP13A3	0.674083	0.843974	Downregulated	No change
P11169	P11169	SLC2A3	0.672428	1.05071	Downregulated	No change
P05556	P05556	ITGB1	0.672297	0.99201	Downregulated	No change
P48029	P48029	SLC6A8	0.669811	0.913111	Downregulated	No change
P46531	P46531	NOTCH1	0.667816	1.02527	Downregulated	No change
P09326	P09326	CD48	1.10892	0.309794	No change	Downregulated
P25025	P25025	CXCR2	0.990692	0.642528	No change	Downregulated
P20333	P20333	TNFRSF1B	0.748202	0.642588	No change	Downregulated
Q99572	Q99572	P2RX7	1.39588	0.756686	No change	Downregulated
P01920	P01920	HLA-DQB1	1.28615	0.672362	No change	Downregulated
P04406	P04406	GAPDH	1.22293	0.688638	No change	Downregulated
P13639	P13639	EEF2	1.18532	0.702192	No change	Downregulated
Q8TDW0	Q8TDW0	LRRC8C	1.00606	0.754759	No change	Downregulated
Q7L1W4	Q7L1W4	LRRC8D	0.981867	0.747273	No change	Downregulated
P11362-21	P11362	FGFR1	0.978077	0.718004	No change	Downregulated
Q9C0H2-4	Q9C0H2	TTYH3	0.799145	0.717014	No change	Downregulated
Q92673	Q92673	SORL1	0.78065	0.681295	No change	Downregulated
P11142	P11142	HSPA8	1.95576	1.06979	No change	No change
P07602-3	P07602	PSAP	1.94475	1.10554	No change	No change
P49327	P49327	FASN	1.7269	1.03444	No change	No change
P29317	P29317	EPHA2	1.67721	0.903734	No change	No change
P68366	P68366	TUBA4A	1.58826	0.901612	No change	No change
Q06481	Q06481	APLP2	1.52813	1.07645	No change	No change
P05067	P05067	APP	1.50171	1.00982	No change	No change
P07900-2	P07900	HSP90AA1	1.49094	0.947136	No change	No change
Q8TCT8	Q8TCT8	SPPL2A	1.4612	0.917295	No change	No change
P14384	P14384	CPM	1.45905	0.973401	No change	No change
P35241-5	P35241	RDX	1.44951	1.01951	No change	No change
A8MVS5	A8MVS5	HIDE1	1.43042	1.03505	No change	No change
P40926	P40926	MDH2	1.42656	0.952963	No change	No change
Q9UIG8	Q9UIG8	SLCO3A1	1.40856	0.932839	No change	No change
Q92692	Q92692	NECTIN2	1.40251	0.981078	No change	No change
P53621-2	P53621	COPA	1.37051	1.06012	No change	No change
Q06830	Q06830	PRDX1	1.36234	0.924195	No change	No change
P04233-2	P04233	CD74	1.3606	0.972284	No change	No change
P08238	P08238	HSP90AB1	1.35443	0.995067	No change	No change
P10809	P10809	HSPD1	1.35331	0.924019	No change	No change
P15151	P15151	PVR	1.34942	0.978111	No change	No change
O94804	O94804	STK10	1.32528	0.918921	No change	No change
P49368	P49368	CCT3	1.32283	0.939257	No change	No change
Q04721	Q04721	NOTCH2	1.31105	0.903362	No change	No change
Q13162	Q13162	PRDX4	1.30752	0.990771	No change	No change
P00488	P00488	F13A1	1.30554	0.884469	No change	No change
Q92956	Q92956	TNFRSF14	1.29664	0.765312	No change	No change
P78324	P78324	SIRPA	1.29427	1.01333	No change	No change
P15813	P15813	CD1D	1.28071	0.960786	No change	No change
B0I1T2	B0I1T2	MYO1G	1.2783	0.832451	No change	No change
Q5QGZ9-1	Q5QGZ9	CLEC12A	1.27514	0.792011	No change	No change
Q9H7M9	Q9H7M9	C10orf54	1.27472	1.14931	No change	No change
P23528	P23528	CFL1	1.27368	0.974549	No change	No change
Q96LC7	Q96LC7	SIGLEC10	1.27194	0.844217	No change	No change
Q01650	Q01650	SLC7A5	1.2695	1.1489	No change	No change
O15389	O15389	SIGLEC5	1.25967	0.980736	No change	No change
P27797	P27797	CALR	1.25721	0.895206	No change	No change
Q5T3F8	Q5T3F8	TMEM63B	1.25616	0.831116	No change	No change
Q14344	Q14344	GNA13	1.25156	1.15703	No change	No change
Q15084-2	Q15084	PDIA6	1.24351	0.900691	No change	No change
Q92542	Q92542	NCSTN	1.23676	0.874987	No change	No change
Q13740-2	Q13740	ALCAM	1.22187	0.888709	No change	No change
P27487	P27487	DPP4	1.22043	0.993333	No change	No change
Q8NHL6-3	Q8NHL6	LILRB1	1.21553	1.08931	No change	No change
P46940	P46940	IQGAP1	1.21359	0.900618	No change	No change
P04275	P04275	VWF	1.20925	1.02646	No change	No change
Q14114	Q14114	LRP8	1.2074	1.23383	No change	No change
P15311	P15311	EZR	1.19789	1.07304	No change	No change
Q9Y4D7	Q9Y4D7	PLXND1	1.19567	0.940395	No change	No change
P35579	P35579	MYH9	1.19262	0.854984	No change	No change
Q09666	Q09666	AHNAK	1.19246	0.977585	No change	No change
Q12913	Q12913	PTPRJ	1.18956	1.06614	No change	No change
Q5VTE0	Q5VTE0	EEF1A1P5	1.1803	0.999887	No change	No change
P15509-7	P15509	CSF2RA	1.17901	0.858748	No change	No change
P62937	P62937	PPIA	1.17843	0.865617	No change	No change
P07237	P07237	P4HB	1.17748	0.796252	No change	No change
P14618	P14618	PKM	1.17298	0.941799	No change	No change
P15529-2	P15529	CD46	1.17125	1.01269	No change	No change
Q6GTX8	Q6GTX8	LAIR1	1.17009	1.07408	No change	No change
Q08722	Q08722	CD47	1.16592	1.16372	No change	No change
P05026	P05026	ATP1B1	1.16575	0.89424	No change	No change
P12314	P12314	FCGR1A	1.16036	1.18694	No change	No change
Q14242-2	Q14242	SELPLG	1.15757	0.915385	No change	No change
Q969P0	Q969P0	IGSF8	1.15749	1.02292	No change	No change
P63000-2	P63000	RAC1	1.15347	1.11044	No change	No change
P78324-2	P78324	SIRPA	1.15288	0.976535	No change	No change
Q92508	Q92508	PIEZO1	1.15277	0.93534	No change	No change
Q8N149	Q8N149	LILRA2	1.15026	0.798975	No change	No change
P48960	P48960	CD97	1.14838	1.20466	No change	No change
P06733	P06733	ENO1	1.14521	0.948909	No change	No change
P60709	P60709	ACTB	1.14327	0.96449	No change	No change
Q969Z4	Q969Z4	RELT	1.14326	0.779749	No change	No change
Q9NRM0	Q9NRM0	SLC2A9	1.14242	0.863199	No change	No change
P51511	P51511	MMP15	1.13819	0.944504	No change	No change
P26038	P26038	MSN	1.13488	1.20524	No change	No change
P07355-2	P07355	ANXA2	1.13196	1.02745	No change	No change
O00478	O00478	BTN3A3	1.13057	0.991079	No change	No change
Q01518	Q01518	CAP1	1.12946	0.84749	No change	No change
P08174-7	P08174	CD55	1.12872	1.0054	No change	No change
P68371	P68371	TUBB4B	1.12808	0.989353	No change	No change
P34910-2	P34910	EVI2B	1.12545	1.00065	No change	No change
P16615	P16615	ATP2A2	1.12479	0.974508	No change	No change
P06576	P06576	ATP5B	1.12397	0.894721	No change	No change
P33527	P33527	ABCC1	1.12158	0.990312	No change	No change
P15153	P15153	RAC2	1.11993	1.14164	No change	No change
Q92536	Q92536	SLC7A6	1.11837	1.00928	No change	No change
Q6P4Q7	Q6P4Q7	CNNM4	1.1174	0.839243	No change	No change
P31641	P31641	SLC6A6	1.11607	1.04284	No change	No change
P19256	P19256	CD58	1.11352	0.907929	No change	No change
P15529	P15529	CD46	1.11162	1.04054	No change	No change
Q9NY35	Q9NY35	CLDND1	1.11146	0.924099	No change	No change
Q96DU3	Q96DU3	SLAMF6	1.11022	0.913064	No change	No change
Q9H813-2	Q9H813	TMEM206	1.10747	0.930388	No change	No change
O60486	O60486	PLXNC1	1.10663	1.00383	No change	No change
P05141	P05141	SLC25A5	1.10303	0.980982	No change	No change
P49961-6	P49961	ENTPD1	1.10277	0.937483	No change	No change
O75054	O75054	IGSF3	1.09951	0.910302	No change	No change
Q8TCT7	Q8TCT7	SPPL2B	1.0981	0.952015	No change	No change
Q9Y5S1	Q9Y5S1	TRPV2	1.09312	0.982552	No change	No change
P14625	P14625	HSP90B1	1.09046	0.894785	No change	No change
P12259	P12259	F5	1.08964	0.79334	No change	No change
P0CG48	P0CG48	UBC	1.08507	1.16615	No change	No change
O00206	O00206	TLR4	1.08467	1.0261	No change	No change
Q9NV96	Q9NV96	TMEM30A	1.08202	0.873672	No change	No change
P51828	P51828	ADCY7	1.07925	0.886201	No change	No change
P43003	P43003	SLC1A3	1.07873	1.05776	No change	No change
P08575	P08575	PTPRC	1.07821	1.12277	No change	No change
O00161	O00161	SNAP23	1.07669	0.864748	No change	No change
Q9HAB3	Q9HAB3	SLC52A2	1.07626	0.969823	No change	No change
P08754	P08754	GNAI3	1.0745	0.938967	No change	No change
P23141-2	P23141	CES1	1.07346	0.829073	No change	No change
P04921	P04921	GYPC	1.07095	1.19814	No change	No change
P31947	P31947	SFN	1.07018	0.876585	No change	No change
O00241	O00241	SIRPB1	1.06604	0.903138	No change	No change
Q00610	Q00610	CLTC	1.0644	0.797216	No change	No change
P09382	P09382	LGALS1	1.06197	0.986807	No change	No change
Q6PCB8	Q6PCB8	EMB	1.06154	0.970482	No change	No change
P14209	P14209	CD99	1.06091	0.89578	No change	No change
O60449-2	O60449	LY75	1.05985	1.01369	No change	No change
P68032	P68032	ACTC1	1.05615	0.927448	No change	No change
Q9BXP2	Q9BXP2	SLC12A9	1.05559	1.15381	No change	No change
P62879	P62879	GNB2	1.055	1.0992	No change	No change
P35580-4	P35580	MYH10	1.05257	0.841641	No change	No change
Q9UIQ6	Q9UIQ6	LNPEP	1.05133	0.863001	No change	No change
P41231	P41231	P2RY2	1.04842	0.880256	No change	No change
P32418	P32418	SLC8A1	1.04839	0.857565	No change	No change
Q8NG11	Q8NG11	TSPAN14	1.04011	0.870744	No change	No change
P20138	P20138	CD33	1.03757	0.912757	No change	No change
P13796	P13796	LCP1	1.03715	0.913824	No change	No change
Q04941	Q04941	PLP2	1.03715	0.940962	No change	No change
Q9UIW2	Q9UIW2	PLXNA1	1.03704	0.996795	No change	No change
P19440	P19440	GGT1	1.03142	0.934264	No change	No change
P63104	P63104	YWHAZ	1.03002	0.776161	No change	No change
P20701-2	P20701	ITGAL	1.02927	1.05728	No change	No change
O15438-4	O15438	ABCC3	1.02725	0.995408	No change	No change
P11021	P11021	HSPA5	1.02713	1.01476	No change	No change
O00299	O00299	CLIC1	1.02379	0.864927	No change	No change
P08195-4	P08195	SLC3A2	1.02088	1.06832	No change	No change
P30101	P30101	PDIA3	1.02069	0.784686	No change	No change
Q9Y490	Q9Y490	TLN1	1.01363	0.92555	No change	No change
Q9Y666	Q9Y666	SLC12A7	1.0118	1.1544	No change	No change
Q14118	Q14118	DAG1	1.01055	0.943109	No change	No change
P42892	P42892	ECE1	1.01021	1.05686	No change	No change
P12931-2	P12931	SRC	1.01002	1.0935	No change	No change
O15439	O15439	ABCC4	1.00987	0.855748	No change	No change
Q9UIB8-3	Q9UIB8	CD84	1.00513	0.908777	No change	No change
P32942	P32942	ICAM3	1.00405	1.07024	No change	No change
Q00325	Q00325	SLC25A3	1.00232	0.9705	No change	No change
P11215-2	P11215	ITGAM	1.00206	0.982996	No change	No change
Q9Y6M5	Q9Y6M5	SLC30A1	0.998376	1.21496	No change	No change
P23634	P23634	ATP2B4	0.995504	0.907385	No change	No change
Q9NY15	Q9NY15	STAB1	0.995284	0.961166	No change	No change
P13612	P13612	ITGA4	0.992112	0.96427	No change	No change
Q8IU68	Q8IU68	TMC8	0.989572	0.833255	No change	No change
P21333	P21333	FLNA	0.988784	0.986194	No change	No change
P13598	P13598	ICAM2	0.985254	1.10893	No change	No change
P21964	P21964	COMT	0.98465	0.874155	No change	No change
Q8TDQ1-6	Q8TDQ1	CD300LF	0.982326	0.83936	No change	No change
P05023-4	P05023	ATP1A1	0.981229	0.956486	No change	No change
Q10588	Q10588	BST1	0.980926	1.02472	No change	No change
Q7Z6M3	Q7Z6M3	MILR1	0.98052	0.968778	No change	No change
Q14162	Q14162	SCARF1	0.980131	1.061	No change	No change
Q9NX76	Q9NX76	CMTM6	0.979976	1.01392	No change	No change
P02788	P02788	LTF	0.977511	0.879112	No change	No change
Q12907	Q12907	LMAN2	0.9773	0.925278	No change	No change
P02787	P02787	TF	0.976504	0.941987	No change	No change
Q9Y624	Q9Y624	F11R	0.976465	0.894369	No change	No change
Q9UP95	Q9UP95	SLC12A4	0.973642	0.996024	No change	No change
Q9Y2C9	Q9Y2C9	TLR6	0.973485	0.846745	No change	No change
Q96BD0	Q96BD0	SLCO4A1	0.97342	1.00335	No change	No change
Q13444	Q13444	ADAM15	0.972224	0.827541	No change	No change
Q9H0X4	Q9H0X4	FAM234A	0.96913	1.00063	No change	No change
Q9Y5Y0	Q9Y5Y0	FLVCR1	0.967462	0.983671	No change	No change
P20645	P20645	M6PR	0.964567	1.15288	No change	No change
P20020	P20020	ATP2B1	0.962585	1.15001	No change	No change
P04899	P04899	GNAI2	0.956337	1.0933	No change	No change
P18084	P18084	ITGB5	0.956262	0.950115	No change	No change
P16150	P16150	SPN	0.955211	0.962957	No change	No change
Q7KYR7	Q7KYR7	BTN2A1	0.951582	0.934994	No change	No change
P98196	P98196	ATP11A	0.950499	1.02948	No change	No change
Q93033	Q93033	CD101	0.949802	0.803562	No change	No change
P16671	P16671	CD36	0.949025	0.940107	No change	No change
Q9ULQ1-3	Q9ULQ1	TPCN1	0.944311	0.877937	No change	No change
Q4KMQ2-2	Q4KMQ2	ANO6	0.944141	0.923551	No change	No change
Q9Y286	Q9Y286	SIGLEC7	0.943839	0.823938	No change	No change
O95977	O95977	S1PR4	0.943604	1.26176	No change	No change
P02749	P02749	APOH	0.94043	0.783298	No change	No change
P18433	P18433	PTPRA	0.940425	0.982061	No change	No change
P04920	P04920	SLC4A2	0.93886	0.954772	No change	No change
P08887	P08887	IL6R	0.935965	0.982294	No change	No change
Q6UWL2-2	Q6UWL2	SUSD1	0.935925	0.813338	No change	No change
P50281	P50281	MMP14	0.933536	0.992897	No change	No change
P48509	P48509	CD151	0.923782	0.810081	No change	No change
P05107	P05107	ITGB2	0.921261	1.06503	No change	No change
Q8IX19	Q8IX19	MCEMP1	0.918183	0.777694	No change	No change
Q96D31	Q96D31	ORAI1	0.915133	0.908133	No change	No change
P30273	P30273	FCER1G	0.914018	0.983541	No change	No change
Q5ZPR3	Q5ZPR3	CD276	0.913992	0.946733	No change	No change
O14672	O14672	ADAM10	0.912769	0.928609	No change	No change
P30679	P30679	GNA15	0.908728	1.00176	No change	No change
O15031	O15031	PLXNB2	0.908102	0.856675	No change	No change
P26447	P26447	S100A4	0.906111	1.00492	No change	No change
P04083	P04083	ANXA1	0.900746	0.992019	No change	No change
Q9BX67	Q9BX67	JAM3	0.898425	1.17638	No change	No change
P78536	P78536	ADAM17	0.897674	1.14414	No change	No change
P54709	P54709	ATP1B3	0.897342	0.966178	No change	No change
P20702	P20702	ITGAX	0.891913	0.992367	No change	No change
O75084	O75084	FZD7	0.8893	0.871229	No change	No change
Q9Y639	Q9Y639	NPTN	0.888775	0.932395	No change	No change
Q8NBI5-2	Q8NBI5	SLC43A3	0.88626	0.997209	No change	No change
P35613	P35613	BSG	0.886248	0.97348	No change	No change
Q8NE01	Q8NE01	CNNM3	0.882517	0.920268	No change	No change
P06756	P06756	ITGAV	0.876221	0.879876	No change	No change
Q658P3-2	Q658P3	STEAP3	0.875265	0.848879	No change	No change
Q9BY67-3	Q9BY67	CADM1	0.873905	1.14086	No change	No change
O00481	O00481	BTN3A1	0.867379	1.1013	No change	No change
Q12999	Q12999	TSPAN31	0.860539	0.9105	No change	No change
P16284	P16284	PECAM1	0.859896	1.09733	No change	No change
Q13308-6	Q13308	PTK7	0.853272	0.973065	No change	No change
Q9H015	Q9H015	SLC22A4	0.852409	0.974706	No change	No change
P19022	P19022	CDH2	0.851152	0.827519	No change	No change
Q9UGN4	Q9UGN4	CD300A	0.845866	0.997925	No change	No change
O75976	O75976	CPD	0.843624	0.937521	No change	No change
O60603	O60603	TLR2	0.836567	1.10754	No change	No change
P23229	P23229	ITGA6	0.836009	0.931925	No change	No change
P17301	P17301	ITGA2	0.835596	0.911335	No change	No change
Q13443	Q13443	ADAM9	0.830431	0.864488	No change	No change
Q8WWI5	Q8WWI5	SLC44A1	0.826778	0.900011	No change	No change
Q5JXA9	Q5JXA9	SIRPB2	0.824458	0.82303	No change	No change
Q9BZW8	Q9BZW8	CD244	0.823918	0.860855	No change	No change
Q10472	Q10472	GALNT1	0.821002	0.794123	No change	No change
Q15762	Q15762	CD226	0.819972	1.10735	No change	No change
P19397	P19397	CD53	0.816129	0.958574	No change	No change
Q15758	Q15758	SLC1A5	0.805935	0.96892	No change	No change
P31785	P31785	IL2RG	0.802729	1.18394	No change	No change
O00421-2	O00421	CCRL2	0.802683	0.867314	No change	No change
O75882	O75882	ATRN	0.790084	1.04492	No change	No change
Q8IWA5-3	Q8IWA5	SLC44A2	0.783647	0.977355	No change	No change
P78552	P78552	IL13RA1	0.783085	0.83716	No change	No change
Q9BS26	Q9BS26	ERP44	0.780992	0.935898	No change	No change
P13591	P13591	NCAM1	0.779842	0.939761	No change	No change
P16070	P16070	CD44	0.77957	1.00964	No change	No change
Q9UHX3	Q9UHX3	ADGRE2	0.779543	1.07506	No change	No change
Q8N386	Q8N386	LRRC25	0.779402	0.814403	No change	No change
P17927	P17927	CR1	0.772919	0.805611	No change	No change
P61073-2	P61073	CXCR4	0.757782	0.888274	No change	No change
P08648	P08648	ITGA5	0.756269	1.0144	No change	No change
P11717	P11717	IGF2R	0.75332	1.02172	No change	No change
Q9UHW9	Q9UHW9	SLC12A6	0.749481	0.822355	No change	No change
Q08708	Q08708	CD300C	0.743205	0.888418	No change	No change
P04156	P04156	PRNP	0.742683	1.04693	No change	No change
P27701	P27701	CD82	0.740405	0.803071	No change	No change
Q96F46	Q96F46	IL17RA	0.738051	0.854062	No change	No change
Q9NP99	Q9NP99	TREM1	0.730502	0.853196	No change	No change
O75144-2	O75144	ICOSLG	0.711255	0.793422	No change	No change
P15260	P15260	IFNGR1	0.70235	1.13782	No change	No change
Q9HAR2	Q9HAR2	ADGRL3	0.70232	0.94402	No change	No change
Q9UP38	Q9UP38	FZD1	0.672145	1.00284	No change	No change
P62805	P62805	HIST1H4A	0.659955	0.765233	No change	No change

## Sheet: S4F- CD4+ T cell Up
Proteins upregulated at the cell surface by IFNa2a in primary CD4+ T cells
Proteins are upregulated according to the the criteria described in the text, of average fold change > 1 SD from mean and FC > 1 in all donors.
The fold change is given as (abundance in sample stimulated with IFNa2a) / (abundance in unstimulated sample)
' - ' indicates that there was no data meeting the filtering criteria (described in methods) for the given donor
P values are calculated on log (LN) transfromed data, with a paird two-tailed t-test, and corrected for multiple hypotheses using the Benjamini-Hochberg method.
Uniprot-L	Uniprot-S	Gene Symbol	Description	Average Fold Change	Donor 6 Fold Change	Donor 7 Fold Change	Donor 8 Fold Change	Donor 9 Fold Change	Donor 10 Fold Change	BH corrected p-value
P18510-3	P18510	IL1RN	Isoform 3 of Interleukin-1 receptor antagonist protein	2.35062	2.13188	1.31592	3.60405	-	-	0.98252
P42892	P42892	ECE1	Endothelin-converting enzyme 1	2.30427	1.91062	3.67942	2.38304	1.62197	1.92629	0.875141
Q10589	Q10589	BST2	Bone marrow stromal antigen 2	2.1628	1.93881	2.00864	2.54096	-	-	0.880219
Q8N131	Q8N131	TMEM123	Porimin	2.00575	1.13846	1.8194	2.73536	1.85986	2.47567	0.880219
P09543	P09543	CNP	2',3'-cyclic-nucleotide 3'-phosphodiesterase	1.45957	1.64863	1.31286	1.1621	1.28116	1.89312	0.880219
P22001	P22001	KCNA3	Potassium voltage-gated channel subfamily A member 3	1.45463	1.23745	1.6908	1.51806	1.2121	1.61477	0.875141
O14626	O14626	GPR171	Probable G-protein coupled receptor 171	1.3696	1.45773	1.59819	1.27539	1.07305	1.44364	0.880219
P13010	P13010	XRCC5	X-ray repair cross-complementing protein 5	1.33186	1.14485	1.0044	1.31329	2.11088	1.08589	0.98252
		HLA-C	HLA class I histocompatibility antigen (HLA-C) combined data	1.31623	1.01822	1.54518	1.10432	1.29575	1.6177	0.98252
Q13835-2	Q13835	PKP1	Isoform 1 of Plakophilin-1	1.29348	1.70817	1.04136	1.13092	-	-	0.98252
P30511-3	P30511	HLA-F	Isoform 3 of HLA class I histocompatibility antigen, alpha chain F	1.2612	1.01998	1.39121	1.1908	1.16652	1.5375	0.976324
P13747	P13747	HLA-E	HLA class I histocompatibility antigen, alpha chain E	1.2594	1.10754	1.2884	1.1941	1.11398	1.593	0.957897
P02763	P02763	ORM1	Alpha-1-acid glycoprotein 1	1.22351	1.41017	1.2105	1.04987	-	-	0.98252

## Sheet: S4G - CD4+ T cell Down
Proteins downregulated at the cell surface by IFNa2a in primary CD4+ T cells
Proteins are downregulated according to the the criteria described in the text, of average fold change > 1 SD from mean and FC < 1 in all donors.
The fold change is given as (abundance in sample stimulated with IFNa2a) / (abundance in unstimulated sample)
' - ' indicates that there was no data meeting the filtering criteria (described in methods) for the given donor
P values are calculated on log (LN) transfromed data, with a paird two-tailed t-test, and corrected for multiple hypotheses using the Benjamini-Hochberg method.
Uniprot-L	Uniprot-S	Gene Symbol	Description	Average Fold Change	Donor 6 Fold Change	Donor 7 Fold Change	Donor 8 Fold Change	Donor 9 Fold Change	Donor 10 Fold Change	BH corrected p-value
Q9NP59	Q9NP59	SLC40A1	Solute carrier family 40 member 1	0.856183	0.711806	0.988215	0.739676	0.926744	0.914472	0.98252
Q8IU68	Q8IU68	TMC8	Transmembrane channel-like protein 8	0.84986	0.805709	0.942835	0.805832	0.757261	0.937661	0.880219
P40200	P40200	CD96	T-cell surface protein tactile	0.848421	0.675692	0.981016	0.888554	-	-	0.98252
Q9H2H9	Q9H2H9	SLC38A1	Sodium-coupled neutral amino acid transporter 1	0.84383	0.782805	0.767185	0.904318	0.782271	0.982572	0.880219
Q8TDL5	Q8TDL5	BPIFB1	BPI fold-containing family B member 1	0.835948	0.970866	0.875438	0.9592	0.639462	0.734771	0.98252
P04196	P04196	HRG	Histidine-rich glycoprotein	0.830203	0.79024	0.991084	0.95143	0.874483	0.543777	0.98252
P01824	P01824	IGHV4-39	Immunoglobulin heavy variable 4-39	0.805518	0.916388	0.756844	0.743321	-	-	0.98252
O95445	O95445	APOM	Apolipoprotein M	0.795767	0.708447	0.784773	0.793017	0.902791	0.789808	0.875141
P00742	P00742	F10	Coagulation factor X	0.78376	0.991003	0.737152	0.629483	0.800628	0.760535	0.880219
P13987	P13987	CD59	CD59 glycoprotein	0.776197	0.434662	0.89653	0.997399	-	-	0.98252
O60486	O60486	PLXNC1	Plexin-C1	0.771502	0.817816	0.565455	0.931236	-	-	0.98252
P09564	P09564	CD7	T-cell antigen CD7	0.729418	0.437884	0.791696	0.958672	-	-	0.98252
P08887	P08887	IL6R	Interleukin-6 receptor subunit alpha	0.7153	0.509926	0.826979	0.808995	-	-	0.98252
P54764	P54764	EPHA4	Ephrin type-A receptor 4	0.687313	0.754675	0.655764	0.607398	0.559512	0.859215	0.875141

## Sheet: S4H - monocytes and T cells 
Comparison of proteins modulated at the cell surface by IFNa2a in primary CD14+ monocytes and CD4+ T cells
Proteins are determined as upregulated in both cell types according to criteria of average fold change > 1 SD from mean and FC > 1 in all donors.
Proteins are determined as downregulated in both cell types according to criteria of average fold change > 1 SD from mean and FC < 1 in all donors.
Uniprot-L	Uniprot-S	Gene Symbol	Average fold change in CD14+ monocytes	Average fold change in CD4+ T cells	Modulated in CD14+ monocytes	Modulated in CD4+ T cells
Q10589	Q10589	BST2	3.6372	2.1628	Upregulated	Upregulated
		HLA-C	1.67572	1.31623	Upregulated	Upregulated
P13747	P13747	HLA-E	1.82414	1.2594	Upregulated	Upregulated
P30511-3	P30511	HLA-F	2.01614	1.2612	Upregulated	Upregulated
Q8N131	Q8N131	TMEM123	2.05382	2.00575	Upregulated	Upregulated
O43852-4	O43852	CALU	1.89653	1.05089	Upregulated	No change
P32248	P32248	CCR7	2.0696	1.2031	Upregulated	No change
P28907	P28907	CD38	3.87849	1.03606	Upregulated	No change
Q6E0U4	Q6E0U4	DMKN	1.65311	0.696147	Upregulated	No change
P25445	P25445	FAS	1.57556	1.03232	Upregulated	No change
		HLA-A	2.10415	1.20078	Upregulated	No change
		HLA-B	2.07494	1.35546	Upregulated	No change
		HLA-DRB1	1.92259	1.08959	Upregulated	No change
P17066	P17066	HSPA6	2.14227	2.30931	Upregulated	No change
P05161	P05161	ISG15	3.29767	3.53584	Upregulated	No change
Q13291-4	Q13291	SLAMF1	2.40509	0.989846	Upregulated	No change
P13987	P13987	CD59	0.639261	0.776197	Downregulated	Downregulated
P15144	P15144	ANPEP	0.6959	0.965058	Downregulated	No change
P58335	P58335	ANTXR2	0.72627	0.907884	Downregulated	No change
P02656	P02656	APOC3	0.576453	0.943833	Downregulated	No change
P08571	P08571	CD14	0.555986	1.01965	Downregulated	No change
Q92896-2	Q92896	GLG1	0.731491	1.01738	Downregulated	No change
Q14956	Q14956	GPNMB	0.654586	1.11676	Downregulated	No change
P32249	P32249	GPR183	0.518655	0.921464	Downregulated	No change
Q15743	Q15743	GPR68	0.278439	0.937173	Downregulated	No change
Q9NPH3	Q9NPH3	IL1RAP	0.538453	1.47776	Downregulated	No change
Q6UWB1	Q6UWB1	IL27RA	0.430014	1.1412	Downregulated	No change
P06213	P06213	INSR	0.680302	0.896597	Downregulated	No change
P05556	P05556	ITGB1	0.672297	0.991824	Downregulated	No change
P11166	P11166	SLC2A1	0.418448	0.838354	Downregulated	No change
P11169	P11169	SLC2A3	0.672428	1.17465	Downregulated	No change
Q9Y6M7-13	Q9Y6M7	SLC4A7	0.656322	0.908569	Downregulated	No change
O43493	O43493	TGOLN2	0.515529	0.981706	Downregulated	No change
P09543	P09543	CNP	0.884865	1.45957	No change	Upregulated
P42892	P42892	ECE1	1.01021	2.30427	No change	Upregulated
Q13835-2	Q13835	PKP1	1.49984	1.29348	No change	Upregulated
P13010	P13010	XRCC5	1.1554	1.33186	No change	Upregulated
O95445	O95445	APOM	0.962083	0.795767	No change	Downregulated
P08887	P08887	IL6R	0.935965	0.7153	No change	Downregulated
O60486	O60486	PLXNC1	1.10663	0.771502	No change	Downregulated
Q8IU68	Q8IU68	TMC8	0.989572	0.84986	No change	Downregulated
P02751-15	P02751	FN1	2.1773	0.902024	No change	No change
P11142	P11142	HSPA8	1.95576	1.14377	No change	No change
P07602-3	P07602	PSAP	1.94475	1.21605	No change	No change
P68871	P68871	HBB	1.61558	0.86612	No change	No change
P68366	P68366	TUBA4A	1.58826	1.07587	No change	No change
Q8NC51-3	Q8NC51	SERBP1	1.56349	1.2009	No change	No change
P09211	P09211	GSTP1	1.51451	1.00717	No change	No change
P08865	P08865	RPSA	1.50529	1.21212	No change	No change
Q53RT3	Q53RT3	ASPRV1	1.49833	1.1254	No change	No change
P07900-2	P07900	HSP90AA1	1.49094	1.14067	No change	No change
Q92854	Q92854	SEMA4D	1.44592	0.902404	No change	No change
P40926	P40926	MDH2	1.42656	1.14855	No change	No change
P19338	P19338	NCL	1.40914	1.18366	No change	No change
Q9UIG8	Q9UIG8	SLCO3A1	1.40856	1.10054	No change	No change
P53621-2	P53621	COPA	1.37051	1.06226	No change	No change
Q99497	Q99497	PARK7	1.36399	1.00812	No change	No change
Q06830	Q06830	PRDX1	1.36234	0.992164	No change	No change
P08238	P08238	HSP90AB1	1.35443	1.02957	No change	No change
P10809	P10809	HSPD1	1.35331	1.2844	No change	No change
P12814-4	P12814	ACTN1	1.35203	0.927707	No change	No change
P12110	P12110	COL6A2	1.35137	0.985986	No change	No change
Q8TD46-4	Q8TD46	CD200R1	1.34595	0.982071	No change	No change
P04075-2	P04075	ALDOA	1.3441	0.968678	No change	No change
P12111	P12111	COL6A3	1.3402	1.05176	No change	No change
P06396	P06396	GSN	1.33846	0.986825	No change	No change
P60174	P60174	TPI1	1.32813	1.13472	No change	No change
O94804	O94804	STK10	1.32528	1.00213	No change	No change
P49368	P49368	CCT3	1.32283	1.11794	No change	No change
P07996	P07996	THBS1	1.32021	0.718357	No change	No change
P21980	P21980	TGM2	1.31597	0.852455	No change	No change
P30041	P30041	PRDX6	1.31532	0.90164	No change	No change
Q13162	Q13162	PRDX4	1.30752	1.0951	No change	No change
P51884	P51884	LUM	1.2925	1.05618	No change	No change
P62993	P62993	GRB2	1.27938	0.942001	No change	No change
B0I1T2	B0I1T2	MYO1G	1.2783	1.06699	No change	No change
P63010-2	P63010	AP2B1	1.2753	1.15558	No change	No change
Q16181	Q16181	SEPT7	1.27451	0.897942	No change	No change
P23528	P23528	CFL1	1.27368	1.12904	No change	No change
P25705	P25705	ATP5A1	1.27203	1.03621	No change	No change
P05362	P05362	ICAM1	1.27195	0.962144	No change	No change
Q01650	Q01650	SLC7A5	1.2695	1.11092	No change	No change
Q05682-4	Q05682	CALD1	1.26855	0.82124	No change	No change
P23458	P23458	JAK1	1.26793	1.02594	No change	No change
P31146	P31146	CORO1A	1.26228	1.04792	No change	No change
P27797	P27797	CALR	1.25721	1.06412	No change	No change
P52272	P52272	HNRNPM	1.25335	1.07968	No change	No change
Q14344	Q14344	GNA13	1.25156	1.09116	No change	No change
P09104	P09104	ENO2	1.25116	0.984197	No change	No change
Q92542	Q92542	NCSTN	1.23676	1.53968	No change	No change
P61626	P61626	LYZ	1.23328	0.938518	No change	No change
P04406	P04406	GAPDH	1.22293	1.02361	No change	No change
Q13740-2	Q13740	ALCAM	1.22187	0.942392	No change	No change
P27487	P27487	DPP4	1.22043	0.977962	No change	No change
Q9BZQ8	Q9BZQ8	FAM129A	1.21544	1.15724	No change	No change
P46940	P46940	IQGAP1	1.21359	1.18642	No change	No change
P02765	P02765	AHSG	1.2108	1.0487	No change	No change
Q15149	Q15149	PLEC	1.20826	1.03184	No change	No change
P13693	P13693	TPT1	1.19959	1.3081	No change	No change
P0C0L5	P0C0L5	C4B	1.19815	0.93696	No change	No change
P15311	P15311	EZR	1.19789	1.44405	No change	No change
P04792	P04792	HSPB1	1.19639	1.56552	No change	No change
P35579	P35579	MYH9	1.19262	1.01705	No change	No change
Q09666	Q09666	AHNAK	1.19246	0.990483	No change	No change
O75369-8	O75369	FLNB	1.19082	1.14313	No change	No change
Q12913	Q12913	PTPRJ	1.18956	0.907151	No change	No change
P13639	P13639	EEF2	1.18532	1.05101	No change	No change
Q5VTE0	Q5VTE0	EEF1A1P5	1.1803	1.01115	No change	No change
P62937	P62937	PPIA	1.17843	1.13759	No change	No change
P84095	P84095	RHOG	1.17828	1.19074	No change	No change
P07237	P07237	P4HB	1.17748	1.07845	No change	No change
P14618	P14618	PKM	1.17298	1.00441	No change	No change
P15529-2	P15529	CD46	1.17125	0.945869	No change	No change
Q6GTX8	Q6GTX8	LAIR1	1.17009	0.872891	No change	No change
P27816	P27816	MAP4	1.16806	0.913322	No change	No change
Q08722	Q08722	CD47	1.16592	1.00931	No change	No change
P05026	P05026	ATP1B1	1.16575	0.951148	No change	No change
P01857	P01857	IGHG1	1.16472	0.879113	No change	No change
Q14699	Q14699	RFTN1	1.16394	1.1174	No change	No change
P02786	P02786	TFRC	1.15981	1.12721	No change	No change
Q14242-2	Q14242	SELPLG	1.15757	0.908993	No change	No change
P68431	P68431	HIST1H3A	1.15753	1.35981	No change	No change
Q969P0	Q969P0	IGSF8	1.15749	1.02238	No change	No change
P63000-2	P63000	RAC1	1.15347	0.997544	No change	No change
P78324-2	P78324	SIRPA	1.15288	0.947727	No change	No change
P48960	P48960	CD97	1.14838	1.15378	No change	No change
P06733	P06733	ENO1	1.14521	1.06526	No change	No change
P60709	P60709	ACTB	1.14327	0.967754	No change	No change
P01042-2	P01042	KNG1	1.13621	0.932889	No change	No change
P26038	P26038	MSN	1.13488	1.08768	No change	No change
P07355-2	P07355	ANXA2	1.13196	0.996502	No change	No change
P23396-2	P23396	RPS3	1.13182	1.05433	No change	No change
O00478	O00478	BTN3A3	1.13057	1.00224	No change	No change
Q01518	Q01518	CAP1	1.12946	0.82814	No change	No change
P08174-7	P08174	CD55	1.12872	1.04759	No change	No change
Q15286	Q15286	RAB35	1.12861	1.05691	No change	No change
P68371	P68371	TUBB4B	1.12808	1.06168	No change	No change
P34910-2	P34910	EVI2B	1.12545	1.07259	No change	No change
P62158	P62158	CALM1	1.12495	0.893162	No change	No change
P16615	P16615	ATP2A2	1.12479	1.15857	No change	No change
P33527	P33527	ABCC1	1.12158	0.896675	No change	No change
P04040	P04040	CAT	1.12124	1.39075	No change	No change
P18206	P18206	VCL	1.12015	0.952268	No change	No change
P15153	P15153	RAC2	1.11993	1.14743	No change	No change
Q92536	Q92536	SLC7A6	1.11837	0.994678	No change	No change
O43707	O43707	ACTN4	1.11693	0.896424	No change	No change
P19256	P19256	CD58	1.11352	0.970563	No change	No change
P15529	P15529	CD46	1.11162	0.935433	No change	No change
Q14315	Q14315	FLNC	1.11047	0.907526	No change	No change
Q96DU3	Q96DU3	SLAMF6	1.11022	1.01158	No change	No change
P09326	P09326	CD48	1.10892	1.03234	No change	No change
P43652	P43652	AFM	1.10835	0.883111	No change	No change
O75083	O75083	WDR1	1.10603	0.996528	No change	No change
P05141	P05141	SLC25A5	1.10303	1.05646	No change	No change
P49961-6	P49961	ENTPD1	1.10277	1.03069	No change	No change
O75131	O75131	CPNE3	1.10141	1.19715	No change	No change
A6NIZ1	A6NIZ1	RP1BL	1.09864	0.916937	No change	No change
Q8TCT7	Q8TCT7	SPPL2B	1.0981	1.01527	No change	No change
P08670	P08670	VIM	1.09658	1.0272	No change	No change
Q9Y5S1	Q9Y5S1	TRPV2	1.09312	0.987537	No change	No change
P14625	P14625	HSP90B1	1.09046	1.0902	No change	No change
P12259	P12259	F5	1.08964	0.881584	No change	No change
P0CG48	P0CG48	UBC	1.08507	1.11513	No change	No change
Q9NV96	Q9NV96	TMEM30A	1.08202	0.92128	No change	No change
P08575	P08575	PTPRC	1.07821	0.927945	No change	No change
P06703	P06703	S100A6	1.07694	0.956848	No change	No change
Q9HAB3	Q9HAB3	SLC52A2	1.07626	0.980646	No change	No change
Q9NZP8	Q9NZP8	C1RL	1.07484	1.02634	No change	No change
P08754	P08754	GNAI3	1.0745	1.22631	No change	No change
P05155-3	P05155	SERPING1	1.07338	0.896578	No change	No change
P04921	P04921	GYPC	1.07095	0.908442	No change	No change
P0CG05	P0CG05	IGLC2	1.07074	0.989285	No change	No change
P31947	P31947	SFN	1.07018	1.89737	No change	No change
O95466-3	O95466	FMNL1	1.06781	1.03515	No change	No change
Q00610	Q00610	CLTC	1.0644	1.17655	No change	No change
P09382	P09382	LGALS1	1.06197	0.975709	No change	No change
Q6PCB8	Q6PCB8	EMB	1.06154	0.98075	No change	No change
P14209	P14209	CD99	1.06091	0.984985	No change	No change
O60449-2	O60449	LY75	1.05985	0.935211	No change	No change
P01860	P01860	IGHG3	1.05882	0.956437	No change	No change
P25311	P25311	AZGP1	1.05629	0.960649	No change	No change
P68032	P68032	ACTC1	1.05615	1.05698	No change	No change
P62879	P62879	GNB2	1.055	1.01674	No change	No change
P61106	P61106	RAB14	1.05427	1.08011	No change	No change
P35580-4	P35580	MYH10	1.05257	1.04634	No change	No change
Q9UIQ6	Q9UIQ6	LNPEP	1.05133	1.26671	No change	No change
P13473-2	P13473	LAMP2	1.04615	1.20539	No change	No change
P33241-3	P33241	LSP1	1.04331	1.13911	No change	No change
Q8NG11	Q8NG11	TSPAN14	1.04011	0.995384	No change	No change
P13796	P13796	LCP1	1.03715	1.08987	No change	No change
Q9UIW2	Q9UIW2	PLXNA1	1.03704	1.00182	No change	No change
P19440	P19440	GGT1	1.03142	0.983838	No change	No change
P13667	P13667	PDIA4	1.03073	1.06801	No change	No change
P63104	P63104	YWHAZ	1.03002	1.14514	No change	No change
P20701-2	P20701	ITGAL	1.02927	0.991728	No change	No change
P08758	P08758	ANXA5	1.02816	1.1114	No change	No change
O15438-4	O15438	ABCC3	1.02725	1.03158	No change	No change
P11021	P11021	HSPA5	1.02713	1.13849	No change	No change
P51148-2	P51148	RAB5C	1.02699	1.1194	No change	No change
P00738	P00738	HP	1.02398	0.91202	No change	No change
O00299	O00299	CLIC1	1.02379	0.921324	No change	No change
P02790	P02790	HPX	1.02221	0.923636	No change	No change
P08195-4	P08195	SLC3A2	1.02088	1.04701	No change	No change
P30101	P30101	PDIA3	1.02069	1.10823	No change	No change
P02760	P02760	AMBP	1.0189	0.944717	No change	No change
Q9Y490	Q9Y490	TLN1	1.01363	1.08229	No change	No change
P05771-2	P05771	PRKCB	1.01297	1.00633	No change	No change
Q9Y666	Q9Y666	SLC12A7	1.0118	1.00494	No change	No change
Q92930	Q92930	RAB8B	1.01175	1.03013	No change	No change
P12931-2	P12931	SRC	1.01002	1.03052	No change	No change
P41240	P41240	CSK	1.00776	1.06656	No change	No change
Q9UIB8-3	Q9UIB8	CD84	1.00513	0.937034	No change	No change
P32942	P32942	ICAM3	1.00405	0.971692	No change	No change
P07858	P07858	CTSB	1.00362	1.09696	No change	No change
P60903	P60903	S100A10	1.00314	1.06021	No change	No change
O00186	O00186	STXBP3	0.996873	1.00945	No change	No change
P07384	P07384	CAPN1	0.996703	0.9844	No change	No change
P23634	P23634	ATP2B4	0.995504	1.06345	No change	No change
P13612	P13612	ITGA4	0.992112	1.0532	No change	No change
P21333	P21333	FLNA	0.988784	0.93973	No change	No change
P13598	P13598	ICAM2	0.985254	1.00884	No change	No change
Q7L1W4	Q7L1W4	LRRC8D	0.981867	0.848807	No change	No change
P05023-4	P05023	ATP1A1	0.981229	0.975305	No change	No change
Q9NX76	Q9NX76	CMTM6	0.979976	1.07256	No change	No change
P11362-21	P11362	FGFR1	0.978077	0.994992	No change	No change
P05090	P05090	APOD	0.977567	0.90556	No change	No change
P02788	P02788	LTF	0.977511	1.10291	No change	No change
P02787	P02787	TF	0.976504	1.11659	No change	No change
Q9Y624	Q9Y624	F11R	0.976465	0.924404	No change	No change
P01009	P01009	SERPINA1	0.974714	0.940515	No change	No change
P01859	P01859	IGHG2	0.97138	1.22731	No change	No change
Q9H0X4	Q9H0X4	FAM234A	0.96913	0.952057	No change	No change
P20645	P20645	M6PR	0.964567	1.25143	No change	No change
P10909-2	P10909	CLU	0.962669	0.927549	No change	No change
P20020	P20020	ATP2B1	0.962585	1.05449	No change	No change
P04899	P04899	GNAI2	0.956337	0.99824	No change	No change
P18084	P18084	ITGB5	0.956262	1.03369	No change	No change
P16150	P16150	SPN	0.955211	1.06817	No change	No change
Q93033	Q93033	CD101	0.949802	0.960704	No change	No change
Q4KMQ2-2	Q4KMQ2	ANO6	0.944141	0.898111	No change	No change
O95977	O95977	S1PR4	0.943604	0.969867	No change	No change
P02749	P02749	APOH	0.94043	0.924621	No change	No change
P18433	P18433	PTPRA	0.940425	0.977739	No change	No change
P04920	P04920	SLC4A2	0.93886	0.975591	No change	No change
P11279	P11279	LAMP1	0.930839	1.16134	No change	No change
P05107	P05107	ITGB2	0.921261	0.978279	No change	No change
P56199	P56199	ITGA1	0.917164	0.976922	No change	No change
Q96D31	Q96D31	ORAI1	0.915133	0.861724	No change	No change
O14672	O14672	ADAM10	0.912769	0.89918	No change	No change
Q00839	Q00839	HNRNPU	0.912287	1.10849	No change	No change
P26447	P26447	S100A4	0.906111	1.05925	No change	No change
P04083	P04083	ANXA1	0.900746	1.0018	No change	No change
Q9BX67	Q9BX67	JAM3	0.898425	0.82523	No change	No change
P78536	P78536	ADAM17	0.897674	1.00709	No change	No change
P54709	P54709	ATP1B3	0.897342	0.937113	No change	No change
Q9BSJ8-2	Q9BSJ8	ESYT1	0.894162	1.09241	No change	No change
P00450	P00450	CP	0.893403	0.873497	No change	No change
P60953	P60953	CDC42	0.891938	1.0764	No change	No change
Q9Y639	Q9Y639	NPTN	0.888775	0.968888	No change	No change
Q8NBI5-2	Q8NBI5	SLC43A3	0.88626	1.05278	No change	No change
P35613	P35613	BSG	0.886248	0.951058	No change	No change
Q8NE01	Q8NE01	CNNM3	0.882517	1.046	No change	No change
P02652	P02652	APOA2	0.881625	0.911513	No change	No change
P04217	P04217	A1BG	0.877655	0.875065	No change	No change
Q9Y3Z3	Q9Y3Z3	SAMHD1	0.874811	1.18897	No change	No change
O00481	O00481	BTN3A1	0.867379	1.05431	No change	No change
P16284	P16284	PECAM1	0.859896	0.928482	No change	No change
P00736	P00736	C1R	0.85596	0.910967	No change	No change
Q9UGN4	Q9UGN4	CD300A	0.845866	0.954083	No change	No change
P23229	P23229	ITGA6	0.836009	0.959895	No change	No change
Q15762	Q15762	CD226	0.819972	0.972863	No change	No change
P19397	P19397	CD53	0.816129	0.916046	No change	No change
P31785	P31785	IL2RG	0.802729	1.12302	No change	No change
P08514	P08514	ITGA2B	0.801867	0.94314	No change	No change
O00391	O00391	QSOX1	0.797779	0.902551	No change	No change
Q8IWA5-3	Q8IWA5	SLC44A2	0.783647	0.948677	No change	No change
P16070	P16070	CD44	0.77957	0.94327	No change	No change
P61073-2	P61073	CXCR4	0.757782	0.865007	No change	No change
P08648	P08648	ITGA5	0.756269	0.958164	No change	No change
Q9UHW9	Q9UHW9	SLC12A6	0.749481	1.01652	No change	No change
P04156	P04156	PRNP	0.742683	1.09443	No change	No change
Q96F46	Q96F46	IL17RA	0.738051	0.875078	No change	No change
P06127	P06127	CD5	0.705336	0.900362	No change	No change
P62805	P62805	HIST1H4A	0.659955	1.81837	No change	No change
